# Supplementary material for: Immunization with short peptide particles reveals a functional CD8+ T-cell neoepitope in a murine renal carcinoma model
Source: J Immunother Cancer. 2021 Dec 3;9(12):e003101. doi: 10.1136/jitc-2021-003101 (PMC8647534; doi:10.1136/jitc-2021-003101)
Supplement: Supplementary data [file jitc-2021-003101supp002.xlsx]

## Sheet: Renca_candidate_neoantigen_MHC_
name	Chr	Position	Ref_Allele	Alt_Allele	Genotype	Symbol	Ensembl_Gene_ID	Ensembl_transcript_ID	Position_of_peptide	Protein_length	Position	A.A.Change	functional_consequence	RNA-Seq_Raw_count	RNA-Seq_Normalized_count(RPKM)	Peptide	H-2-Dd_Rank	H-2-Ld_Rank	H-2-Kd_Rank
renca_01	1	10189617	T	G	0/1	Arfgef1	ENSMUSG00000067851	ENSMUST00000088615	534-542	1846	542	K/T	missense_variant	19863	12.7193	TSTSSFDHT	18.0923	39.1093	22.8488
renca_02	1	10189617	T	G	0/1	Arfgef1	ENSMUSG00000067851	ENSMUST00000088615	535-543	1846	542	K/T	missense_variant	19863	12.7193	STSSFDHTW	1.7279	9.7727	15.6714
renca_03	1	10189617	T	G	0/1	Arfgef1	ENSMUSG00000067851	ENSMUST00000088615	536-544	1846	542	K/T	missense_variant	19863	12.7193	TSSFDHTWM	4.7103	5.412	15.5834
renca_04	1	10189617	T	G	0/1	Arfgef1	ENSMUSG00000067851	ENSMUST00000088615	537-545	1846	542	K/T	missense_variant	19863	12.7193	SSFDHTWMV	1.4507	1.3474	3.4358
renca_05	1	10189617	T	G	0/1	Arfgef1	ENSMUSG00000067851	ENSMUST00000088615	538-546	1846	542	K/T	missense_variant	19863	12.7193	SFDHTWMVI	4.894	3.9553	1.5525
renca_06	1	10189617	T	G	0/1	Arfgef1	ENSMUSG00000067851	ENSMUST00000088615	539-547	1846	542	K/T	missense_variant	19863	12.7193	FDHTWMVIQ	82.7489	51.9186	89.6085
renca_07	1	10189617	T	G	0/1	Arfgef1	ENSMUSG00000067851	ENSMUST00000088615	540-548	1846	542	K/T	missense_variant	19863	12.7193	DHTWMVIQT	48.8288	34.3989	23.0529
renca_08	1	10189617	T	G	0/1	Arfgef1	ENSMUSG00000067851	ENSMUST00000088615	541-549	1846	542	K/T	missense_variant	19863	12.7193	HTWMVIQTL	5.8761	1.8276	6.5607
renca_09	1	10189617	T	G	0/1	Arfgef1	ENSMUSG00000067851	ENSMUST00000088615	542-550	1846	542	K/T	missense_variant	19863	12.7193	TWMVIQTLT	54.08	21.5004	2.9992
renca_10	1	33454246	C	T	0/1	Prim2	ENSMUSG00000026134	ENSMUST00000027312	445-453	505	453	R/H	missense_variant	10302	12.5739	NQFFFESQH	71.4732	34.954	65.6261
renca_11	1	33454246	C	T	0/1	Prim2	ENSMUSG00000026134	ENSMUST00000027312	446-454	505	453	R/H	missense_variant	10302	12.5739	QFFFESQHI	23.4864	5.9253	0.7258
renca_12	1	33454246	C	T	0/1	Prim2	ENSMUSG00000026134	ENSMUST00000027312	447-455	505	453	R/H	missense_variant	10302	12.5739	FFFESQHIL	3.3265	1.005	0.2866
renca_13	1	33454246	C	T	0/1	Prim2	ENSMUSG00000026134	ENSMUST00000027312	448-456	505	453	R/H	missense_variant	10302	12.5739	FFESQHILT	55.5503	47.714	27.0852
renca_14	1	33454246	C	T	0/1	Prim2	ENSMUSG00000026134	ENSMUST00000027312	449-457	505	453	R/H	missense_variant	10302	12.5739	FESQHILTG	61.2173	37.5163	45.9774
renca_15	1	33454246	C	T	0/1	Prim2	ENSMUSG00000026134	ENSMUST00000027312	450-458	505	453	R/H	missense_variant	10302	12.5739	ESQHILTGG	58.4735	50.9258	57.5756
renca_16	1	33454246	C	T	0/1	Prim2	ENSMUSG00000026134	ENSMUST00000027312	451-459	505	453	R/H	missense_variant	10302	12.5739	SQHILTGGK	51.4286	37.7745	26.6647
renca_17	1	33454246	C	T	0/1	Prim2	ENSMUSG00000026134	ENSMUST00000027312	452-460	505	453	R/H	missense_variant	10302	12.5739	QHILTGGKD	91.5707	74.8387	32.6553
renca_18	1	33454246	C	T	0/1	Prim2	ENSMUSG00000026134	ENSMUST00000027312	453-461	505	453	R/H	missense_variant	10302	12.5739	HILTGGKDI	69.1591	19.6636	9.1684
renca_19	1	33746779	T	G	0/1	Bag2	ENSMUSG00000042215	ENSMUST00000044691	146-154	210	154	K/T	missense_variant	14372	34.0507	VPPGPVDQT	40.4865	25.5196	85.7153
renca_20	1	33746779	T	G	0/1	Bag2	ENSMUSG00000042215	ENSMUST00000044691	147-155	210	154	K/T	missense_variant	14372	34.0507	PPGPVDQTF	55.5291	8.537	84.9905
renca_21	1	33746779	T	G	0/1	Bag2	ENSMUSG00000042215	ENSMUST00000044691	148-156	210	154	K/T	missense_variant	14372	34.0507	PGPVDQTFQ	44.407	95.9617	96.0166
renca_22	1	33746779	T	G	0/1	Bag2	ENSMUSG00000042215	ENSMUST00000044691	149-157	210	154	K/T	missense_variant	14372	34.0507	GPVDQTFQS	92.1289	21.3237	84.4042
renca_23	1	33746779	T	G	0/1	Bag2	ENSMUSG00000042215	ENSMUST00000044691	150-158	210	154	K/T	missense_variant	14372	34.0507	PVDQTFQSI	24.3493	30.6955	25.006
renca_24	1	33746779	T	G	0/1	Bag2	ENSMUSG00000042215	ENSMUST00000044691	151-159	210	154	K/T	missense_variant	14372	34.0507	VDQTFQSIV	18.9666	10.2935	28.2362
renca_25	1	33746779	T	G	0/1	Bag2	ENSMUSG00000042215	ENSMUST00000044691	152-160	210	154	K/T	missense_variant	14372	34.0507	DQTFQSIVI	27.182	15.4565	16.767
renca_26	1	33746779	T	G	0/1	Bag2	ENSMUSG00000042215	ENSMUST00000044691	153-161	210	154	K/T	missense_variant	14372	34.0507	QTFQSIVIG	38.112	54.3809	52.477
renca_27	1	33746779	T	G	0/1	Bag2	ENSMUSG00000042215	ENSMUST00000044691	154-162	210	154	K/T	missense_variant	14372	34.0507	TFQSIVIGC	63.7262	39.3086	29.274
renca_28	1	34173047	T	A	0/1	Dst	ENSMUSG00000026131	ENSMUST00000097785	1342-1350	7393	1350	C/S	missense_variant	93947	16.5443	VKQSKMDES	85.1694	78.5639	68.7915
renca_29	1	34173047	T	A	0/1	Dst	ENSMUSG00000026131	ENSMUST00000097785	1343-1351	7393	1350	C/S	missense_variant	93947	16.5443	KQSKMDESQ	82.0534	86.7084	61.3741
renca_30	1	34173047	T	A	0/1	Dst	ENSMUSG00000026131	ENSMUST00000097785	1344-1352	7393	1350	C/S	missense_variant	93947	16.5443	QSKMDESQK	77.0721	77.2285	78.7122
renca_31	1	34173047	T	A	0/1	Dst	ENSMUSG00000026131	ENSMUST00000097785	1345-1353	7393	1350	C/S	missense_variant	93947	16.5443	SKMDESQKY	80.7028	46.5529	74.4677
renca_32	1	34173047	T	A	0/1	Dst	ENSMUSG00000026131	ENSMUST00000097785	1346-1354	7393	1350	C/S	missense_variant	93947	16.5443	KMDESQKYS	55.254	69.8887	28.5986
renca_33	1	34173047	T	A	0/1	Dst	ENSMUSG00000026131	ENSMUST00000097785	1347-1355	7393	1350	C/S	missense_variant	93947	16.5443	MDESQKYSE	92.3812	64.7542	96.3176
renca_34	1	34173047	T	A	0/1	Dst	ENSMUSG00000026131	ENSMUST00000097785	1348-1356	7393	1350	C/S	missense_variant	93947	16.5443	DESQKYSEQ	95.5509	72.2283	95.9391
renca_35	1	34173047	T	A	0/1	Dst	ENSMUSG00000026131	ENSMUST00000097785	1349-1357	7393	1350	C/S	missense_variant	93947	16.5443	ESQKYSEQY	39.2302	25.1683	74.8175
renca_36	1	34173047	T	A	0/1	Dst	ENSMUSG00000026131	ENSMUST00000097785	1350-1358	7393	1350	C/S	missense_variant	93947	16.5443	SQKYSEQYS	77.5177	48.5556	27.6362
renca_37	1	34201267	G	A	0/1	Dst	ENSMUSG00000026131	ENSMUST00000097785	3905-3913	7393	3913	G/E	missense_variant	93947	16.5443	DLRYITISE	93.5243	53.5471	92.8528
renca_38	1	34201267	G	A	0/1	Dst	ENSMUSG00000026131	ENSMUST00000097785	3906-3914	7393	3913	G/E	missense_variant	93947	16.5443	LRYITISEN	88.7483	64.7296	43.0066
renca_39	1	34201267	G	A	0/1	Dst	ENSMUSG00000026131	ENSMUST00000097785	3907-3915	7393	3913	G/E	missense_variant	93947	16.5443	RYITISENR	54.7758	27.5988	2.4698
renca_40	1	34201267	G	A	0/1	Dst	ENSMUSG00000026131	ENSMUST00000097785	3908-3916	7393	3913	G/E	missense_variant	93947	16.5443	YITISENRV	44.3591	38.1726	21.0183
renca_41	1	34201267	G	A	0/1	Dst	ENSMUSG00000026131	ENSMUST00000097785	3909-3917	7393	3913	G/E	missense_variant	93947	16.5443	ITISENRVI	10.3978	19.5412	5.9557
renca_42	1	34201267	G	A	0/1	Dst	ENSMUSG00000026131	ENSMUST00000097785	3910-3918	7393	3913	G/E	missense_variant	93947	16.5443	TISENRVID	88.8693	79.4483	77.3819
renca_43	1	34201267	G	A	0/1	Dst	ENSMUSG00000026131	ENSMUST00000097785	3911-3919	7393	3913	G/E	missense_variant	93947	16.5443	ISENRVIDA	37.6852	45.4165	77.8602
renca_44	1	34201267	G	A	0/1	Dst	ENSMUSG00000026131	ENSMUST00000097785	3912-3920	7393	3913	G/E	missense_variant	93947	16.5443	SENRVIDAA	63.9286	32.9872	24.0363
renca_45	1	34201267	G	A	0/1	Dst	ENSMUSG00000026131	ENSMUST00000097785	3913-3921	7393	3913	G/E	missense_variant	93947	16.5443	ENRVIDAAK	72.7163	44.7822	69.6185
renca_46	1	34442944	G	C	0/1	Imp4	ENSMUSG00000026127	ENSMUST00000027303	41-49	291	49	E/D	missense_variant	8409	7.12548	LIPTELRRD	59.7302	95.4306	95.3497
renca_47	1	34442944	G	C	0/1	Imp4	ENSMUSG00000026127	ENSMUST00000027303	42-50	291	49	E/D	missense_variant	8409	7.12548	IPTELRRDA	80.3404	6.5206	62.0528
renca_48	1	34442944	G	C	0/1	Imp4	ENSMUSG00000026127	ENSMUST00000027303	43-51	291	49	E/D	missense_variant	8409	7.12548	PTELRRDAL	24.854	32.1381	56.7725
renca_49	1	34442944	G	C	0/1	Imp4	ENSMUSG00000026127	ENSMUST00000027303	44-52	291	49	E/D	missense_variant	8409	7.12548	TELRRDALA	66.4748	28.3921	46.2392
renca_50	1	34442944	G	C	0/1	Imp4	ENSMUSG00000026127	ENSMUST00000027303	45-53	291	49	E/D	missense_variant	8409	7.12548	ELRRDALAL	33.1369	12.4181	34.1834
renca_51	1	34442944	G	C	0/1	Imp4	ENSMUSG00000026127	ENSMUST00000027303	46-54	291	49	E/D	missense_variant	8409	7.12548	LRRDALALQ	92.4495	63.5288	83.7609
renca_52	1	34442944	G	C	0/1	Imp4	ENSMUSG00000026127	ENSMUST00000027303	47-55	291	49	E/D	missense_variant	8409	7.12548	RRDALALQG	64.8601	65.159	64.9264
renca_53	1	34442944	G	C	0/1	Imp4	ENSMUSG00000026127	ENSMUST00000027303	48-56	291	49	E/D	missense_variant	8409	7.12548	RDALALQGS	63.625	74.3633	80.0019
renca_54	1	34442944	G	C	0/1	Imp4	ENSMUSG00000026127	ENSMUST00000027303	49-57	291	49	E/D	missense_variant	8409	7.12548	DALALQGSL	24.117	1.9754	11.2691
renca_55	1	36702581	G	A	0/1	Actr1b	ENSMUSG00000037351	ENSMUST00000043951	62-70	376	70	T/I	missense_variant	17443	29.5784	AEEHRGLLI	29.0669	14.6519	33.2696
renca_56	1	36702581	G	A	0/1	Actr1b	ENSMUSG00000037351	ENSMUST00000043951	63-71	376	70	T/I	missense_variant	17443	29.5784	EEHRGLLII	43.2163	14.0538	20.9029
renca_57	1	36702581	G	A	0/1	Actr1b	ENSMUSG00000037351	ENSMUST00000043951	64-72	376	70	T/I	missense_variant	17443	29.5784	EHRGLLIIR	85.9786	36.9645	55.1664
renca_58	1	36702581	G	A	0/1	Actr1b	ENSMUSG00000037351	ENSMUST00000043951	65-73	376	70	T/I	missense_variant	17443	29.5784	HRGLLIIRY	71.4045	48.6768	89.8921
renca_59	1	36702581	G	A	0/1	Actr1b	ENSMUSG00000037351	ENSMUST00000043951	66-74	376	70	T/I	missense_variant	17443	29.5784	RGLLIIRYP	11.9042	27.812	30.3269
renca_60	1	36702581	G	A	0/1	Actr1b	ENSMUSG00000037351	ENSMUST00000043951	67-75	376	70	T/I	missense_variant	17443	29.5784	GLLIIRYPM	28.6766	3.0813	14.7945
renca_61	1	36702581	G	A	0/1	Actr1b	ENSMUSG00000037351	ENSMUST00000043951	68-76	376	70	T/I	missense_variant	17443	29.5784	LLIIRYPME	53.5321	47.2372	85.4446
renca_62	1	36702581	G	A	0/1	Actr1b	ENSMUSG00000037351	ENSMUST00000043951	69-77	376	70	T/I	missense_variant	17443	29.5784	LIIRYPMEH	71.1023	47.2953	91.1466
renca_63	1	36702581	G	A	0/1	Actr1b	ENSMUSG00000037351	ENSMUST00000043951	70-78	376	70	T/I	missense_variant	17443	29.5784	IIRYPMEHG	67.9916	50.8561	73.4259
renca_64	1	40451750	C	T	0/1	Il1rl1	ENSMUSG00000026069	ENSMUST00000053043	389-397	567	397	A/V	missense_variant	8299	8.72454	PRVFRGSAV	65.2296	54.8829	22.4599
renca_65	1	40451750	C	T	0/1	Il1rl1	ENSMUSG00000026069	ENSMUST00000053043	390-398	567	397	A/V	missense_variant	8299	8.72454	RVFRGSAVG	22.6777	27.2989	20.2884
renca_66	1	40451750	C	T	0/1	Il1rl1	ENSMUSG00000026069	ENSMUST00000053043	391-399	567	397	A/V	missense_variant	8299	8.72454	VFRGSAVGT	85.9267	50.8031	26.5439
renca_67	1	40451750	C	T	0/1	Il1rl1	ENSMUSG00000026069	ENSMUST00000053043	392-400	567	397	A/V	missense_variant	8299	8.72454	FRGSAVGTH	88.6169	76.493	68.7623
renca_68	1	40451750	C	T	0/1	Il1rl1	ENSMUSG00000026069	ENSMUST00000053043	393-401	567	397	A/V	missense_variant	8299	8.72454	RGSAVGTHS	27.1552	34.4979	24.9497
renca_69	1	40451750	C	T	0/1	Il1rl1	ENSMUSG00000026069	ENSMUST00000053043	394-402	567	397	A/V	missense_variant	8299	8.72454	GSAVGTHSV	14.8748	21.9537	4.7844
renca_70	1	40451750	C	T	0/1	Il1rl1	ENSMUSG00000026069	ENSMUST00000053043	395-403	567	397	A/V	missense_variant	8299	8.72454	SAVGTHSVE	59.7487	37.6618	31.5243
renca_71	1	40451750	C	T	0/1	Il1rl1	ENSMUSG00000026069	ENSMUST00000053043	396-404	567	397	A/V	missense_variant	8299	8.72454	AVGTHSVEY	45.0944	19.6248	64.2812
renca_72	1	40451750	C	T	0/1	Il1rl1	ENSMUSG00000026069	ENSMUST00000053043	397-405	567	397	A/V	missense_variant	8299	8.72454	VGTHSVEYF	0.2833	4.3986	14.9575
renca_73	1	42905474	A	T	0/1	Mrps9	ENSMUSG00000060679	ENSMUST00000057208	376-384	390	384	K/M	missense_variant	6565	8.25609	PGQEGARRM	31.3345	26.5873	50.6252
renca_74	1	42905474	A	T	0/1	Mrps9	ENSMUSG00000060679	ENSMUST00000057208	377-385	390	384	K/M	missense_variant	6565	8.25609	GQEGARRMF	37.7559	21.2281	26.2963
renca_75	1	42905474	A	T	0/1	Mrps9	ENSMUSG00000060679	ENSMUST00000057208	378-386	390	384	K/M	missense_variant	6565	8.25609	QEGARRMFT	81.0761	28.3965	80.8691
renca_76	1	42905474	A	T	0/1	Mrps9	ENSMUSG00000060679	ENSMUST00000057208	379-387	390	384	K/M	missense_variant	6565	8.25609	EGARRMFTW	0.2491	8.6072	31.2875
renca_77	1	42905474	A	T	0/1	Mrps9	ENSMUSG00000060679	ENSMUST00000057208	380-388	390	384	K/M	missense_variant	6565	8.25609	GARRMFTWK	19.1163	12.7303	18.8083
renca_78	1	42905474	A	T	0/1	Mrps9	ENSMUSG00000060679	ENSMUST00000057208	381-389	390	384	K/M	missense_variant	6565	8.25609	ARRMFTWKK	56.7487	29.6338	59.5296
renca_79	1	42905474	A	T	0/1	Mrps9	ENSMUSG00000060679	ENSMUST00000057208	382-390	390	384	K/M	missense_variant	6565	8.25609	RRMFTWKKR	68.2762	23.0893	44.4418
renca_80	1	53348262	G	A	0/1	Asnsd1	ENSMUSG00000026095	ENSMUST00000027264	61-69	627	69	H/Y	missense_variant	9431	19.3739	TIQPVEDEY	61.0208	28.2114	75.2692
renca_81	1	53348262	G	A	0/1	Asnsd1	ENSMUSG00000026095	ENSMUST00000027264	62-70	627	69	H/Y	missense_variant	9431	19.3739	IQPVEDEYG	25.9033	73.7097	77.3431
renca_82	1	53348262	G	A	0/1	Asnsd1	ENSMUSG00000026095	ENSMUST00000027264	63-71	627	69	H/Y	missense_variant	9431	19.3739	QPVEDEYGN	97.2994	76.2391	97.5132
renca_83	1	53348262	G	A	0/1	Asnsd1	ENSMUSG00000026095	ENSMUST00000027264	64-72	627	69	H/Y	missense_variant	9431	19.3739	PVEDEYGNV	78.3345	83.7986	90.6333
renca_84	1	53348262	G	A	0/1	Asnsd1	ENSMUSG00000026095	ENSMUST00000027264	65-73	627	69	H/Y	missense_variant	9431	19.3739	VEDEYGNVF	18.6563	8.146	55.1694
renca_85	1	53348262	G	A	0/1	Asnsd1	ENSMUSG00000026095	ENSMUST00000027264	66-74	627	69	H/Y	missense_variant	9431	19.3739	EDEYGNVFL	37.6768	24.6059	77.0004
renca_86	1	53348262	G	A	0/1	Asnsd1	ENSMUSG00000026095	ENSMUST00000027264	67-75	627	69	H/Y	missense_variant	9431	19.3739	DEYGNVFLW	13.502	2.7189	32.6909
renca_87	1	53348262	G	A	0/1	Asnsd1	ENSMUSG00000026095	ENSMUST00000027264	68-76	627	69	H/Y	missense_variant	9431	19.3739	EYGNVFLWN	84.8536	54.6793	52.3322
renca_88	1	53348262	G	A	0/1	Asnsd1	ENSMUSG00000026095	ENSMUST00000027264	69-77	627	69	H/Y	missense_variant	9431	19.3739	YGNVFLWNG	6.8709	19.0674	54.6756
renca_89	1	54427466	C	T	0/1	Gtf3c3	ENSMUSG00000041303	ENSMUST00000041638	264-272	882	272	R/H	missense_variant	5754	8.46744	KMAMDGYRH	68.5931	59.8625	69.2588
renca_90	1	54427466	C	T	0/1	Gtf3c3	ENSMUSG00000041303	ENSMUST00000041638	265-273	882	272	R/H	missense_variant	5754	8.46744	MAMDGYRHI	5.2355	0.3861	0.8627
renca_91	1	54427466	C	T	0/1	Gtf3c3	ENSMUSG00000041303	ENSMUST00000041638	266-274	882	272	R/H	missense_variant	5754	8.46744	AMDGYRHIL	3.9715	2.6328	5.0383
renca_92	1	54427466	C	T	0/1	Gtf3c3	ENSMUSG00000041303	ENSMUST00000041638	267-275	882	272	R/H	missense_variant	5754	8.46744	MDGYRHILN	57.2857	48.9924	94.7203
renca_93	1	54427466	C	T	0/1	Gtf3c3	ENSMUSG00000041303	ENSMUST00000041638	268-276	882	272	R/H	missense_variant	5754	8.46744	DGYRHILNL	0.5937	0.7283	8.4228
renca_94	1	54427466	C	T	0/1	Gtf3c3	ENSMUSG00000041303	ENSMUST00000041638	269-277	882	272	R/H	missense_variant	5754	8.46744	GYRHILNLL	23.2087	8.6477	0.337
renca_95	1	54427466	C	T	0/1	Gtf3c3	ENSMUSG00000041303	ENSMUST00000041638	270-278	882	272	R/H	missense_variant	5754	8.46744	YRHILNLLS	69.8642	34.3584	46.0687
renca_96	1	54427466	C	T	0/1	Gtf3c3	ENSMUSG00000041303	ENSMUST00000041638	271-279	882	272	R/H	missense_variant	5754	8.46744	RHILNLLSP	28.1871	32.7852	3.6008
renca_97	1	54427466	C	T	0/1	Gtf3c3	ENSMUSG00000041303	ENSMUST00000041638	272-280	882	272	R/H	missense_variant	5754	8.46744	HILNLLSPS	62.6905	33.4958	14.689
renca_98	1	58471071	A	T	0/1	Orc2	ENSMUSG00000026037	ENSMUST00000027198	379-387	576	387	L/H	missense_variant	15715	29.5293	FKEDSSLEH	95.7225	87.8697	96.2793
renca_99	1	58471071	A	T	0/1	Orc2	ENSMUSG00000026037	ENSMUST00000027198	380-388	576	387	L/H	missense_variant	15715	29.5293	KEDSSLEHF	28.391	18.5029	39.4629
renca_100	1	58471071	A	T	0/1	Orc2	ENSMUSG00000026037	ENSMUST00000027198	381-389	576	387	L/H	missense_variant	15715	29.5293	EDSSLEHFL	28.5791	10.4144	51.1877
renca_101	1	58471071	A	T	0/1	Orc2	ENSMUSG00000026037	ENSMUST00000027198	382-390	576	387	L/H	missense_variant	15715	29.5293	DSSLEHFLL	1.4625	3.1839	33.02
renca_102	1	58471071	A	T	0/1	Orc2	ENSMUSG00000026037	ENSMUST00000027198	383-391	576	387	L/H	missense_variant	15715	29.5293	SSLEHFLLI	0.0553	1.045	1.1567
renca_103	1	58471071	A	T	0/1	Orc2	ENSMUSG00000026037	ENSMUST00000027198	384-392	576	387	L/H	missense_variant	15715	29.5293	SLEHFLLIH	78.2956	85.9774	96.9032
renca_104	1	58471071	A	T	0/1	Orc2	ENSMUSG00000026037	ENSMUST00000027198	385-393	576	387	L/H	missense_variant	15715	29.5293	LEHFLLIHN	93.8242	55.05	85.2653
renca_105	1	58471071	A	T	0/1	Orc2	ENSMUSG00000026037	ENSMUST00000027198	386-394	576	387	L/H	missense_variant	15715	29.5293	EHFLLIHNL	9.335	0.989	2.3376
renca_106	1	58471071	A	T	0/1	Orc2	ENSMUSG00000026037	ENSMUST00000027198	387-395	576	387	L/H	missense_variant	15715	29.5293	HFLLIHNLD	75.7072	50.3123	26.1923
renca_107	1	59863926	C	A	0/1	Bmpr2	ENSMUSG00000067336	ENSMUST00000087435	512-520	1038	520	P/Q	missense_variant	10591	4.26838	KSVSPTVNQ	50.8946	62.5456	62.9756
renca_108	1	59863926	C	A	0/1	Bmpr2	ENSMUSG00000067336	ENSMUST00000087435	513-521	1038	520	P/Q	missense_variant	10591	4.26838	SVSPTVNQM	25.2293	4.9913	6.484
renca_109	1	59863926	C	A	0/1	Bmpr2	ENSMUSG00000067336	ENSMUST00000087435	514-522	1038	520	P/Q	missense_variant	10591	4.26838	VSPTVNQMS	12.0371	50.5103	55.9271
renca_110	1	59863926	C	A	0/1	Bmpr2	ENSMUSG00000067336	ENSMUST00000087435	515-523	1038	520	P/Q	missense_variant	10591	4.26838	SPTVNQMST	69.9062	7.142	48.3651
renca_111	1	59863926	C	A	0/1	Bmpr2	ENSMUSG00000067336	ENSMUST00000087435	516-524	1038	520	P/Q	missense_variant	10591	4.26838	PTVNQMSTA	77.9774	82.5745	45.8363
renca_112	1	59863926	C	A	0/1	Bmpr2	ENSMUSG00000067336	ENSMUST00000087435	517-525	1038	520	P/Q	missense_variant	10591	4.26838	TVNQMSTAM	21.207	2.6007	3.8153
renca_113	1	59863926	C	A	0/1	Bmpr2	ENSMUSG00000067336	ENSMUST00000087435	518-526	1038	520	P/Q	missense_variant	10591	4.26838	VNQMSTAMQ	47.4317	44.444	68.4538
renca_114	1	59863926	C	A	0/1	Bmpr2	ENSMUSG00000067336	ENSMUST00000087435	519-527	1038	520	P/Q	missense_variant	10591	4.26838	NQMSTAMQN	79.6499	33.7271	13.7733
renca_115	1	59863926	C	A	0/1	Bmpr2	ENSMUSG00000067336	ENSMUST00000087435	520-528	1038	520	P/Q	missense_variant	10591	4.26838	QMSTAMQNE	77.0934	70.8192	46.7132
renca_116	1	64734996	G	C	0/1	Fzd5	ENSMUSG00000045005	ENSMUST00000063982	527-535	585	535	S/R	missense_variant	3922	4.11059	LESWRRFTR	46.7297	13.9005	68.5743
renca_117	1	64734996	G	C	0/1	Fzd5	ENSMUSG00000045005	ENSMUST00000063982	528-536	585	535	S/R	missense_variant	3922	4.11059	ESWRRFTRR	23.7285	19.5133	41.1148
renca_118	1	64734996	G	C	0/1	Fzd5	ENSMUSG00000045005	ENSMUST00000063982	529-537	585	535	S/R	missense_variant	3922	4.11059	SWRRFTRRC	26.1833	29.2862	14.9764
renca_119	1	64734996	G	C	0/1	Fzd5	ENSMUSG00000045005	ENSMUST00000063982	530-538	585	535	S/R	missense_variant	3922	4.11059	WRRFTRRCC	72.9842	44.6266	61.66
renca_120	1	64734996	G	C	0/1	Fzd5	ENSMUSG00000045005	ENSMUST00000063982	531-539	585	535	S/R	missense_variant	3922	4.11059	RRFTRRCCC	25.0308	19.3564	31.9611
renca_121	1	64734996	G	C	0/1	Fzd5	ENSMUSG00000045005	ENSMUST00000063982	532-540	585	535	S/R	missense_variant	3922	4.11059	RFTRRCCCS	36.3831	46.0165	22.1964
renca_122	1	64734996	G	C	0/1	Fzd5	ENSMUSG00000045005	ENSMUST00000063982	533-541	585	535	S/R	missense_variant	3922	4.11059	FTRRCCCSS	19.2326	20.4671	19.4356
renca_123	1	64734996	G	C	0/1	Fzd5	ENSMUSG00000045005	ENSMUST00000063982	534-542	585	535	S/R	missense_variant	3922	4.11059	TRRCCCSSR	64.6786	26.2451	30.189
renca_124	1	64734996	G	C	0/1	Fzd5	ENSMUSG00000045005	ENSMUST00000063982	535-543	585	535	S/R	missense_variant	3922	4.11059	RRCCCSSRR	63.0565	48.2601	40.0342
renca_125	1	65268845	A	T	0/1	Pikfyve	ENSMUSG00000025949	ENSMUST00000081154	1807-1815	2052	1815	K/M	missense_variant	15431	5.82147	SPWQARGGM	30.9787	0.094	17.1474
renca_126	1	65268845	A	T	0/1	Pikfyve	ENSMUSG00000025949	ENSMUST00000081154	1808-1816	2052	1815	K/M	missense_variant	15431	5.82147	PWQARGGMS	93.9578	95.0942	86.8825
renca_127	1	65268845	A	T	0/1	Pikfyve	ENSMUSG00000025949	ENSMUST00000081154	1809-1817	2052	1815	K/M	missense_variant	15431	5.82147	WQARGGMSG	55.4762	43.4221	20.9601
renca_128	1	65268845	A	T	0/1	Pikfyve	ENSMUSG00000025949	ENSMUST00000081154	1810-1818	2052	1815	K/M	missense_variant	15431	5.82147	QARGGMSGA	72.5962	37.4183	41.0634
renca_129	1	65268845	A	T	0/1	Pikfyve	ENSMUSG00000025949	ENSMUST00000081154	1811-1819	2052	1815	K/M	missense_variant	15431	5.82147	ARGGMSGAA	84.4912	67.2496	38.672
renca_130	1	65268845	A	T	0/1	Pikfyve	ENSMUSG00000025949	ENSMUST00000081154	1812-1820	2052	1815	K/M	missense_variant	15431	5.82147	RGGMSGAAF	0.4607	2.1784	10.7074
renca_131	1	65268845	A	T	0/1	Pikfyve	ENSMUSG00000025949	ENSMUST00000081154	1813-1821	2052	1815	K/M	missense_variant	15431	5.82147	GGMSGAAFY	11.009	4.2028	16.9831
renca_132	1	65268845	A	T	0/1	Pikfyve	ENSMUSG00000025949	ENSMUST00000081154	1814-1822	2052	1815	K/M	missense_variant	15431	5.82147	GMSGAAFYA	36.4537	24.5757	9.7419
renca_133	1	65268845	A	T	0/1	Pikfyve	ENSMUSG00000025949	ENSMUST00000081154	1815-1823	2052	1815	K/M	missense_variant	15431	5.82147	MSGAAFYAT	9.0915	7.1722	19.7051
renca_134	1	66714640	A	G	0/1	Rpe	ENSMUSG00000026005	ENSMUST00000027157	81-89	228	89	N/S	missense_variant	9384	21.8473	KPMAVAGAS	61.7321	2.7757	24.5363
renca_135	1	66714640	A	G	0/1	Rpe	ENSMUSG00000026005	ENSMUST00000027157	82-90	228	89	N/S	missense_variant	9384	21.8473	PMAVAGASQ	93.459	88.7176	75.1956
renca_136	1	66714640	A	G	0/1	Rpe	ENSMUSG00000026005	ENSMUST00000027157	83-91	228	89	N/S	missense_variant	9384	21.8473	MAVAGASQY	39.5198	7.451	24.167
renca_137	1	66714640	A	G	0/1	Rpe	ENSMUSG00000026005	ENSMUST00000027157	84-92	228	89	N/S	missense_variant	9384	21.8473	AVAGASQYT	59.3201	43.7213	24.9813
renca_138	1	66714640	A	G	0/1	Rpe	ENSMUSG00000026005	ENSMUST00000027157	85-93	228	89	N/S	missense_variant	9384	21.8473	VAGASQYTF	0.7722	0.7084	11.4881
renca_139	1	66714640	A	G	0/1	Rpe	ENSMUSG00000026005	ENSMUST00000027157	86-94	228	89	N/S	missense_variant	9384	21.8473	AGASQYTFH	17.7913	24.9363	48.1205
renca_140	1	66714640	A	G	0/1	Rpe	ENSMUSG00000026005	ENSMUST00000027157	87-95	228	89	N/S	missense_variant	9384	21.8473	GASQYTFHL	3.0798	1.4307	6.2931
renca_141	1	66714640	A	G	0/1	Rpe	ENSMUSG00000026005	ENSMUST00000027157	88-96	228	89	N/S	missense_variant	9384	21.8473	ASQYTFHLE	11.0695	24.6368	35.5164
renca_142	1	66714640	A	G	0/1	Rpe	ENSMUSG00000026005	ENSMUST00000027157	89-97	228	89	N/S	missense_variant	9384	21.8473	SQYTFHLEA	9.0567	2.8306	4.6544
renca_143	1	66762205	A	C	0/1	Kansl1l	ENSMUSG00000026004	ENSMUST00000068168	526-534	947	534	L/R	missense_variant	4590	4.9919	LSSSSSWLR	19.2326	25.4313	32.5541
renca_144	1	66762205	A	C	0/1	Kansl1l	ENSMUSG00000026004	ENSMUST00000068168	527-535	947	534	L/R	missense_variant	4590	4.9919	SSSSSWLRN	25.1565	35.6938	47.704
renca_145	1	66762205	A	C	0/1	Kansl1l	ENSMUSG00000026004	ENSMUST00000068168	528-536	947	534	L/R	missense_variant	4590	4.9919	SSSSWLRNQ	50.0994	56.675	57.9008
renca_146	1	66762205	A	C	0/1	Kansl1l	ENSMUSG00000026004	ENSMUST00000068168	529-537	947	534	L/R	missense_variant	4590	4.9919	SSSWLRNQK	13.8025	17.0997	13.5708
renca_147	1	66762205	A	C	0/1	Kansl1l	ENSMUSG00000026004	ENSMUST00000068168	530-538	947	534	L/R	missense_variant	4590	4.9919	SSWLRNQKH	51.0818	33.5388	77.0875
renca_148	1	66762205	A	C	0/1	Kansl1l	ENSMUSG00000026004	ENSMUST00000068168	531-539	947	534	L/R	missense_variant	4590	4.9919	SWLRNQKHS	80.4978	61.8048	9.094
renca_149	1	66762205	A	C	0/1	Kansl1l	ENSMUSG00000026004	ENSMUST00000068168	532-540	947	534	L/R	missense_variant	4590	4.9919	WLRNQKHSK	77.3975	35.1903	65.1497
renca_150	1	66762205	A	C	0/1	Kansl1l	ENSMUSG00000026004	ENSMUST00000068168	533-541	947	534	L/R	missense_variant	4590	4.9919	LRNQKHSKK	83.1589	67.6868	62.8068
renca_151	1	66762205	A	C	0/1	Kansl1l	ENSMUSG00000026004	ENSMUST00000068168	534-542	947	534	L/R	missense_variant	4590	4.9919	RNQKHSKKR	62.4673	66.0493	81.4345
renca_152	1	75190391	G	C	0/1	Atg9a	ENSMUSG00000033124	ENSMUST00000040689	2019-01-09	839	5	D/E	missense_variant	6759	8.50154	MAQFETEYQ	43.1332	28.3549	61.2939
renca_153	1	75190391	G	C	0/1	Atg9a	ENSMUSG00000033124	ENSMUST00000040689	2019-02-10	839	5	D/E	missense_variant	6759	8.50154	AQFETEYQR	65.621	31.2336	33.443
renca_154	1	75190391	G	C	0/1	Atg9a	ENSMUSG00000033124	ENSMUST00000040689	2019-03-11	839	5	D/E	missense_variant	6759	8.50154	QFETEYQRL	27.1008	16.6995	12.4138
renca_155	1	75190391	G	C	0/1	Atg9a	ENSMUSG00000033124	ENSMUST00000040689	2019-04-12	839	5	D/E	missense_variant	6759	8.50154	FETEYQRLE	80.3404	51.0736	79.39
renca_156	1	75190391	G	C	0/1	Atg9a	ENSMUSG00000033124	ENSMUST00000040689	2019-05-13	839	5	D/E	missense_variant	6759	8.50154	ETEYQRLEA	70.1168	50.2538	84.0152
renca_157	1	75475490	T	C	0/1	Chpf	ENSMUSG00000032997	ENSMUST00000079205	594-602	774	602	K/R	missense_variant	11365	21.361	LRLMDLLSR	83.3345	54.6458	66.1464
renca_158	1	75475490	T	C	0/1	Chpf	ENSMUSG00000032997	ENSMUST00000079205	595-603	774	602	K/R	missense_variant	11365	21.361	RLMDLLSRK	35.5519	25.5341	14.1745
renca_159	1	75475490	T	C	0/1	Chpf	ENSMUSG00000032997	ENSMUST00000079205	596-604	774	602	K/R	missense_variant	11365	21.361	LMDLLSRKH	78.7871	76.1471	91.6692
renca_160	1	75475490	T	C	0/1	Chpf	ENSMUSG00000032997	ENSMUST00000079205	597-605	774	602	K/R	missense_variant	11365	21.361	MDLLSRKHP	83.4773	50.2259	55.977
renca_161	1	75475490	T	C	0/1	Chpf	ENSMUSG00000032997	ENSMUST00000079205	598-606	774	602	K/R	missense_variant	11365	21.361	DLLSRKHPL	19.4445	3.2184	17.5453
renca_162	1	75475490	T	C	0/1	Chpf	ENSMUSG00000032997	ENSMUST00000079205	599-607	774	602	K/R	missense_variant	11365	21.361	LLSRKHPLD	56.6323	75.6567	84.3757
renca_163	1	75475490	T	C	0/1	Chpf	ENSMUSG00000032997	ENSMUST00000079205	600-608	774	602	K/R	missense_variant	11365	21.361	LSRKHPLDT	53.4928	42.2311	69.2552
renca_164	1	75475490	T	C	0/1	Chpf	ENSMUSG00000032997	ENSMUST00000079205	601-609	774	602	K/R	missense_variant	11365	21.361	SRKHPLDTL	25.698	14.2862	9.1439
renca_165	1	75475490	T	C	0/1	Chpf	ENSMUSG00000032997	ENSMUST00000079205	602-610	774	602	K/R	missense_variant	11365	21.361	RKHPLDTLF	26.0263	9.1383	23.2836
renca_166	1	78360209	A	G	0/1	Sgpp2	ENSMUSG00000032908	ENSMUST00000036172	67-75	354	75	R/G	missense_variant	374	0.677303	NIDPNLSRG	68.522	69.0382	56.5608
renca_167	1	78360209	A	G	0/1	Sgpp2	ENSMUSG00000032908	ENSMUST00000036172	68-76	354	75	R/G	missense_variant	374	0.677303	IDPNLSRGL	7.491	18.0491	50.4664
renca_168	1	78360209	A	G	0/1	Sgpp2	ENSMUSG00000032908	ENSMUST00000036172	69-77	354	75	R/G	missense_variant	374	0.677303	DPNLSRGLV	45.3067	3.6349	39.3936
renca_169	1	78360209	A	G	0/1	Sgpp2	ENSMUSG00000032908	ENSMUST00000036172	70-78	354	75	R/G	missense_variant	374	0.677303	PNLSRGLVV	27.5013	25.4959	19.2115
renca_170	1	78360209	A	G	0/1	Sgpp2	ENSMUSG00000032908	ENSMUST00000036172	71-79	354	75	R/G	missense_variant	374	0.677303	NLSRGLVVI	22.928	27.0588	11.5792
renca_171	1	78360209	A	G	0/1	Sgpp2	ENSMUSG00000032908	ENSMUST00000036172	72-80	354	75	R/G	missense_variant	374	0.677303	LSRGLVVIW	10.6664	23.4336	55.729
renca_172	1	78360209	A	G	0/1	Sgpp2	ENSMUSG00000032908	ENSMUST00000036172	73-81	354	75	R/G	missense_variant	374	0.677303	SRGLVVIWV	49.4192	25.5842	33.5526
renca_173	1	78360209	A	G	0/1	Sgpp2	ENSMUSG00000032908	ENSMUST00000036172	74-82	354	75	R/G	missense_variant	374	0.677303	RGLVVIWVL	0.6908	1.9225	11.0189
renca_174	1	78360209	A	G	0/1	Sgpp2	ENSMUSG00000032908	ENSMUST00000036172	75-83	354	75	R/G	missense_variant	374	0.677303	GLVVIWVLV	51.981	52.8026	44.7744
renca_175	1	88266118	C	G	0/1	Hjurp	ENSMUSG00000044783	ENSMUST00000054674	348-356	667	356	S/T	missense_variant	43287	37.6573	SKRQVHKST	92.8207	56.8937	63.5323
renca_176	1	88266118	C	G	0/1	Hjurp	ENSMUSG00000044783	ENSMUST00000054674	349-357	667	356	S/T	missense_variant	43287	37.6573	KRQVHKSTP	74.8146	63.6482	37.0139
renca_177	1	88266118	C	G	0/1	Hjurp	ENSMUSG00000044783	ENSMUST00000054674	350-358	667	356	S/T	missense_variant	43287	37.6573	RQVHKSTPA	34.5849	24.7177	4.4898
renca_178	1	88266118	C	G	0/1	Hjurp	ENSMUSG00000044783	ENSMUST00000054674	351-359	667	356	S/T	missense_variant	43287	37.6573	QVHKSTPAW	15.4094	10.9408	24.722
renca_179	1	88266118	C	G	0/1	Hjurp	ENSMUSG00000044783	ENSMUST00000054674	352-360	667	356	S/T	missense_variant	43287	37.6573	VHKSTPAWK	60.3452	25.5569	14.6521
renca_180	1	88266118	C	G	0/1	Hjurp	ENSMUSG00000044783	ENSMUST00000054674	353-361	667	356	S/T	missense_variant	43287	37.6573	HKSTPAWKE	95.3849	85.1587	93.2385
renca_181	1	88266118	C	G	0/1	Hjurp	ENSMUSG00000044783	ENSMUST00000054674	354-362	667	356	S/T	missense_variant	43287	37.6573	KSTPAWKEL	1.7562	2.5805	5.8624
renca_182	1	88266118	C	G	0/1	Hjurp	ENSMUSG00000044783	ENSMUST00000054674	355-363	667	356	S/T	missense_variant	43287	37.6573	STPAWKELQ	19.6021	60.9726	73.4202
renca_183	1	88266118	C	G	0/1	Hjurp	ENSMUSG00000044783	ENSMUST00000054674	356-364	667	356	S/T	missense_variant	43287	37.6573	TPAWKELQM	21.6116	0.239	36.445
renca_184	1	97840283	G	T	0/1	Pam	ENSMUSG00000026335	ENSMUST00000058762	733-741	979	741	P/T	missense_variant	15505	9.44942	NVFAISYIT	56.2302	14.9983	38.3885
renca_185	1	97840283	G	T	0/1	Pam	ENSMUSG00000026335	ENSMUST00000058762	734-742	979	741	P/T	missense_variant	15505	9.44942	VFAISYITG	34.6815	34.4435	19.3472
renca_186	1	97840283	G	T	0/1	Pam	ENSMUSG00000026335	ENSMUST00000058762	735-743	979	741	P/T	missense_variant	15505	9.44942	FAISYITGF	2.9026	1.258	6.026
renca_187	1	97840283	G	T	0/1	Pam	ENSMUSG00000026335	ENSMUST00000058762	736-744	979	741	P/T	missense_variant	15505	9.44942	AISYITGFL	12.8308	7.136	14.0903
renca_188	1	97840283	G	T	0/1	Pam	ENSMUSG00000026335	ENSMUST00000058762	737-745	979	741	P/T	missense_variant	15505	9.44942	ISYITGFLF	0.1851	0.5837	12.8237
renca_189	1	97840283	G	T	0/1	Pam	ENSMUSG00000026335	ENSMUST00000058762	738-746	979	741	P/T	missense_variant	15505	9.44942	SYITGFLFA	24.5856	8.6521	0.2864
renca_190	1	97840283	G	T	0/1	Pam	ENSMUSG00000026335	ENSMUST00000058762	739-747	979	741	P/T	missense_variant	15505	9.44942	YITGFLFAV	16.4875	11.3459	23.9028
renca_191	1	97840283	G	T	0/1	Pam	ENSMUSG00000026335	ENSMUST00000058762	740-748	979	741	P/T	missense_variant	15505	9.44942	ITGFLFAVN	27.0277	42.994	68.7258
renca_192	1	97840283	G	T	0/1	Pam	ENSMUSG00000026335	ENSMUST00000058762	741-749	979	741	P/T	missense_variant	15505	9.44942	TGFLFAVNG	4.5834	11.1069	46.3267
renca_193	1	105656738	G	C	0/1	Pign	ENSMUSG00000056536	ENSMUST00000070699	83-91	931	91	P/A	missense_variant	29780	15.8757	WGVSHTRVA	18.5194	14.8501	13.6438
renca_194	1	105656738	G	C	0/1	Pign	ENSMUSG00000056536	ENSMUST00000070699	84-92	931	91	P/A	missense_variant	29780	15.8757	GVSHTRVAT	87.379	64.6138	50.88
renca_195	1	105656738	G	C	0/1	Pign	ENSMUSG00000056536	ENSMUST00000070699	85-93	931	91	P/A	missense_variant	29780	15.8757	VSHTRVATE	17.2341	27.6152	39.3516
renca_196	1	105656738	G	C	0/1	Pign	ENSMUSG00000056536	ENSMUST00000070699	86-94	931	91	P/A	missense_variant	29780	15.8757	SHTRVATES	53.9598	36.0231	4.393
renca_197	1	105656738	G	C	0/1	Pign	ENSMUSG00000056536	ENSMUST00000070699	87-95	931	91	P/A	missense_variant	29780	15.8757	HTRVATESR	49.8559	34.9331	44.4454
renca_198	1	105656738	G	C	0/1	Pign	ENSMUSG00000056536	ENSMUST00000070699	88-96	931	91	P/A	missense_variant	29780	15.8757	TRVATESRP	95.2563	90.7138	50.6307
renca_199	1	105656738	G	C	0/1	Pign	ENSMUSG00000056536	ENSMUST00000070699	89-97	931	91	P/A	missense_variant	29780	15.8757	RVATESRPG	53.1368	50.8756	44.4736
renca_200	1	105656738	G	C	0/1	Pign	ENSMUSG00000056536	ENSMUST00000070699	90-98	931	91	P/A	missense_variant	29780	15.8757	VATESRPGH	80.765	51.2744	90.5994
renca_201	1	105656738	G	C	0/1	Pign	ENSMUSG00000056536	ENSMUST00000070699	91-99	931	91	P/A	missense_variant	29780	15.8757	ATESRPGHV	37.5201	41.6513	37.8895
renca_202	1	134350219	T	G	0/1	Tmem183a	ENSMUSG00000042305	ENSMUST00000049470	261-269	375	269	K/T	missense_variant	14026	28.5223	KQSPRLKST	57.7275	55.4344	29.8542
renca_203	1	134350219	T	G	0/1	Tmem183a	ENSMUSG00000042305	ENSMUST00000049470	262-270	375	269	K/T	missense_variant	14026	28.5223	QSPRLKSTC	2.6742	42.488	25.0165
renca_204	1	134350219	T	G	0/1	Tmem183a	ENSMUSG00000042305	ENSMUST00000049470	263-271	375	269	K/T	missense_variant	14026	28.5223	SPRLKSTCM	26.9701	0.2958	34.7312
renca_205	1	134350219	T	G	0/1	Tmem183a	ENSMUSG00000042305	ENSMUST00000049470	264-272	375	269	K/T	missense_variant	14026	28.5223	PRLKSTCME	96.642	95.1534	86.4014
renca_206	1	134350219	T	G	0/1	Tmem183a	ENSMUSG00000042305	ENSMUST00000049470	265-273	375	269	K/T	missense_variant	14026	28.5223	RLKSTCMER	57.1111	34.622	42.9523
renca_207	1	134350219	T	G	0/1	Tmem183a	ENSMUSG00000042305	ENSMUST00000049470	266-274	375	269	K/T	missense_variant	14026	28.5223	LKSTCMERL	30.6511	25.4122	28.216
renca_208	1	134350219	T	G	0/1	Tmem183a	ENSMUSG00000042305	ENSMUST00000049470	267-275	375	269	K/T	missense_variant	14026	28.5223	KSTCMERLQ	43.2284	61.0323	58.7916
renca_209	1	134350219	T	G	0/1	Tmem183a	ENSMUSG00000042305	ENSMUST00000049470	268-276	375	269	K/T	missense_variant	14026	28.5223	STCMERLQP	51.4378	73.6333	60.112
renca_210	1	134350219	T	G	0/1	Tmem183a	ENSMUSG00000042305	ENSMUST00000049470	269-277	375	269	K/T	missense_variant	14026	28.5223	TCMERLQPP	54.9584	40.973	33.3622
renca_211	1	134987648	C	G	0/1	Lgr6	ENSMUSG00000042793	ENSMUST00000044828	723-731	967	731	G/A	missense_variant	1093	1.15626	PEGRPAALA	91.0808	84.7967	92.158
renca_212	1	134987648	C	G	0/1	Lgr6	ENSMUSG00000042793	ENSMUST00000044828	724-732	967	731	G/A	missense_variant	1093	1.15626	EGRPAALAF	4.0937	1.2716	27.2607
renca_213	1	134987648	C	G	0/1	Lgr6	ENSMUSG00000042793	ENSMUST00000044828	725-733	967	731	G/A	missense_variant	1093	1.15626	GRPAALAFA	35.0164	48.0707	21.1748
renca_214	1	134987648	C	G	0/1	Lgr6	ENSMUSG00000042793	ENSMUST00000044828	726-734	967	731	G/A	missense_variant	1093	1.15626	RPAALAFAV	9.5988	0.0323	5.2597
renca_215	1	134987648	C	G	0/1	Lgr6	ENSMUSG00000042793	ENSMUST00000044828	727-735	967	731	G/A	missense_variant	1093	1.15626	PAALAFAVA	32.3382	32.3504	31.5556
renca_216	1	134987648	C	G	0/1	Lgr6	ENSMUSG00000042793	ENSMUST00000044828	728-736	967	731	G/A	missense_variant	1093	1.15626	AALAFAVAL	2.9618	0.4412	4.2414
renca_217	1	134987648	C	G	0/1	Lgr6	ENSMUSG00000042793	ENSMUST00000044828	729-737	967	731	G/A	missense_variant	1093	1.15626	ALAFAVALV	16.5966	27.4282	10.8287
renca_218	1	134987648	C	G	0/1	Lgr6	ENSMUSG00000042793	ENSMUST00000044828	730-738	967	731	G/A	missense_variant	1093	1.15626	LAFAVALVM	8.8379	1.0974	15.1983
renca_219	1	134987648	C	G	0/1	Lgr6	ENSMUSG00000042793	ENSMUST00000044828	731-739	967	731	G/A	missense_variant	1093	1.15626	AFAVALVMM	29.3905	14.4801	7.2725
renca_220	1	135390578	G	A	0/1	Ipo9	ENSMUSG00000041879	ENSMUST00000041023	690-698	1040	698	A/V	missense_variant	24146	21.2557	ICQAFPAVV	21.9294	12.3012	26.8245
renca_221	1	135390578	G	A	0/1	Ipo9	ENSMUSG00000041879	ENSMUST00000041023	691-699	1040	698	A/V	missense_variant	24146	21.2557	CQAFPAVVQ	63.8423	62.6826	62.2317
renca_222	1	135390578	G	A	0/1	Ipo9	ENSMUSG00000041879	ENSMUST00000041023	692-700	1040	698	A/V	missense_variant	24146	21.2557	QAFPAVVQC	30.3138	13.2593	35.7874
renca_223	1	135390578	G	A	0/1	Ipo9	ENSMUSG00000041879	ENSMUST00000041023	693-701	1040	698	A/V	missense_variant	24146	21.2557	AFPAVVQCT	45.3666	59.1094	14.2193
renca_224	1	135390578	G	A	0/1	Ipo9	ENSMUSG00000041879	ENSMUST00000041023	694-702	1040	698	A/V	missense_variant	24146	21.2557	FPAVVQCTL	5.7785	0.0899	5.0775
renca_225	1	135390578	G	A	0/1	Ipo9	ENSMUSG00000041879	ENSMUST00000041023	695-703	1040	698	A/V	missense_variant	24146	21.2557	PAVVQCTLH	87.2718	87.6399	82.0892
renca_226	1	135390578	G	A	0/1	Ipo9	ENSMUSG00000041879	ENSMUST00000041023	696-704	1040	698	A/V	missense_variant	24146	21.2557	AVVQCTLHT	69.2335	55.8812	28.3142
renca_227	1	135390578	G	A	0/1	Ipo9	ENSMUSG00000041879	ENSMUST00000041023	697-705	1040	698	A/V	missense_variant	24146	21.2557	VVQCTLHTD	50.4785	45.0239	46.474
renca_228	1	135390578	G	A	0/1	Ipo9	ENSMUSG00000041879	ENSMUST00000041023	698-706	1040	698	A/V	missense_variant	24146	21.2557	VQCTLHTDD	89.0595	80.4833	52.9574
renca_229	1	136119068	G	C	0/1	Cacna1s	ENSMUSG00000026407	ENSMUST00000112064	1825-1833	1852	1833	A/P	missense_variant	184	0.203594	MEPEEVEVP	72.3489	74.1087	85.0988
renca_230	1	136119068	G	C	0/1	Cacna1s	ENSMUSG00000026407	ENSMUST00000112064	1826-1834	1852	1833	A/P	missense_variant	184	0.203594	EPEEVEVPA	91.342	31.1957	91.1144
renca_231	1	136119068	G	C	0/1	Cacna1s	ENSMUSG00000026407	ENSMUST00000112064	1827-1835	1852	1833	A/P	missense_variant	184	0.203594	PEEVEVPAT	97.0277	96.2484	97.5175
renca_232	1	136119068	G	C	0/1	Cacna1s	ENSMUSG00000026407	ENSMUST00000112064	1828-1836	1852	1833	A/P	missense_variant	184	0.203594	EEVEVPATE	96.2408	70.9847	87.9985
renca_233	1	136119068	G	C	0/1	Cacna1s	ENSMUSG00000026407	ENSMUST00000112064	1829-1837	1852	1833	A/P	missense_variant	184	0.203594	EVEVPATEL	46.051	14.4677	41.0846
renca_234	1	136119068	G	C	0/1	Cacna1s	ENSMUSG00000026407	ENSMUST00000112064	1830-1838	1852	1833	A/P	missense_variant	184	0.203594	VEVPATELL	19.7196	3.6451	11.9157
renca_235	1	136119068	G	C	0/1	Cacna1s	ENSMUSG00000026407	ENSMUST00000112064	1831-1839	1852	1833	A/P	missense_variant	184	0.203594	EVPATELLK	43.109	66.4308	74.4981
renca_236	1	136119068	G	C	0/1	Cacna1s	ENSMUSG00000026407	ENSMUST00000112064	1832-1840	1852	1833	A/P	missense_variant	184	0.203594	VPATELLKQ	86.971	25.3558	95.2507
renca_237	1	136119068	G	C	0/1	Cacna1s	ENSMUSG00000026407	ENSMUST00000112064	1833-1841	1852	1833	A/P	missense_variant	184	0.203594	PATELLKQE	96.2229	95.7924	93.9118
renca_238	1	150413667	T	G	0/1	Tpr	ENSMUSG00000006005	ENSMUST00000119161	575-583	2357	583	L/R	missense_variant	41217	28.4604	KIAELQHKR	58.0608	46.2259	50.369
renca_239	1	150413667	T	G	0/1	Tpr	ENSMUSG00000006005	ENSMUST00000119161	576-584	2357	583	L/R	missense_variant	41217	28.4604	IAELQHKRE	73.6538	67.3808	94.4374
renca_240	1	150413667	T	G	0/1	Tpr	ENSMUSG00000006005	ENSMUST00000119161	577-585	2357	583	L/R	missense_variant	41217	28.4604	AELQHKREN	95.9561	61.7205	73.4125
renca_241	1	150413667	T	G	0/1	Tpr	ENSMUSG00000006005	ENSMUST00000119161	578-586	2357	583	L/R	missense_variant	41217	28.4604	ELQHKRENS	95.3377	74.4355	90.9468
renca_242	1	150413667	T	G	0/1	Tpr	ENSMUSG00000006005	ENSMUST00000119161	579-587	2357	583	L/R	missense_variant	41217	28.4604	LQHKRENSL	12.8053	5.0107	6.3856
renca_243	1	150413667	T	G	0/1	Tpr	ENSMUSG00000006005	ENSMUST00000119161	580-588	2357	583	L/R	missense_variant	41217	28.4604	QHKRENSLA	69.5796	51.5142	16.6479
renca_244	1	150413667	T	G	0/1	Tpr	ENSMUSG00000006005	ENSMUST00000119161	581-589	2357	583	L/R	missense_variant	41217	28.4604	HKRENSLAE	94.0647	62.3666	82.4345
renca_245	1	150413667	T	G	0/1	Tpr	ENSMUSG00000006005	ENSMUST00000119161	582-590	2357	583	L/R	missense_variant	41217	28.4604	KRENSLAEL	31.7437	20.1454	12.7534
renca_246	1	150413667	T	G	0/1	Tpr	ENSMUSG00000006005	ENSMUST00000119161	583-591	2357	583	L/R	missense_variant	41217	28.4604	RENSLAELE	79.4378	49.488	68.8207
renca_247	1	151796809	A	C	0/1	Edem3	ENSMUSG00000043019	ENSMUST00000059498	417-425	931	425	E/D	missense_variant	11356	12.8981	ATGDPYYLD	42.0855	69.1335	88.6352
renca_248	1	151796809	A	C	0/1	Edem3	ENSMUSG00000043019	ENSMUST00000059498	418-426	931	425	E/D	missense_variant	11356	12.8981	TGDPYYLDV	1.2544	5.6731	36.6778
renca_249	1	151796809	A	C	0/1	Edem3	ENSMUSG00000043019	ENSMUST00000059498	419-427	931	425	E/D	missense_variant	11356	12.8981	GDPYYLDVG	35.556	94.5926	93.4092
renca_250	1	151796809	A	C	0/1	Edem3	ENSMUSG00000043019	ENSMUST00000059498	420-428	931	425	E/D	missense_variant	11356	12.8981	DPYYLDVGK	79.703	17.3053	87.7863
renca_251	1	151796809	A	C	0/1	Edem3	ENSMUSG00000043019	ENSMUST00000059498	421-429	931	425	E/D	missense_variant	11356	12.8981	PYYLDVGKT	95.9577	92.1629	23.9048
renca_252	1	151796809	A	C	0/1	Edem3	ENSMUSG00000043019	ENSMUST00000059498	422-430	931	425	E/D	missense_variant	11356	12.8981	YYLDVGKTL	16.3028	2.4594	0.0295
renca_253	1	151796809	A	C	0/1	Edem3	ENSMUSG00000043019	ENSMUST00000059498	423-431	931	425	E/D	missense_variant	11356	12.8981	YLDVGKTLI	8.5605	12.4516	4.1853
renca_254	1	151796809	A	C	0/1	Edem3	ENSMUSG00000043019	ENSMUST00000059498	424-432	931	425	E/D	missense_variant	11356	12.8981	LDVGKTLIE	90.2791	76.5981	95.1435
renca_255	1	151796809	A	C	0/1	Edem3	ENSMUSG00000043019	ENSMUST00000059498	425-433	931	425	E/D	missense_variant	11356	12.8981	DVGKTLIEN	96.2685	83.3514	94.9062
renca_256	1	156064881	A	C	0/1	Tor1aip2	ENSMUSG00000050565	ENSMUST00000060404	303-311	502	311	K/T	missense_variant	35895	28.2219	SFLWQRGRT	71.3874	37.9183	8.9248
renca_257	1	156064881	A	C	0/1	Tor1aip2	ENSMUSG00000050565	ENSMUST00000060404	304-312	502	311	K/T	missense_variant	35895	28.2219	FLWQRGRTF	4.9115	1.3284	8.528
renca_258	1	156064881	A	C	0/1	Tor1aip2	ENSMUSG00000050565	ENSMUST00000060404	305-313	502	311	K/T	missense_variant	35895	28.2219	LWQRGRTFL	10.846	2.9872	0.6824
renca_259	1	156064881	A	C	0/1	Tor1aip2	ENSMUSG00000050565	ENSMUST00000060404	306-314	502	311	K/T	missense_variant	35895	28.2219	WQRGRTFLQ	63.2857	28.4775	66.7251
renca_260	1	156064881	A	C	0/1	Tor1aip2	ENSMUSG00000050565	ENSMUST00000060404	307-315	502	311	K/T	missense_variant	35895	28.2219	QRGRTFLQK	70.5563	57.4563	56.2704
renca_261	1	156064881	A	C	0/1	Tor1aip2	ENSMUSG00000050565	ENSMUST00000060404	308-316	502	311	K/T	missense_variant	35895	28.2219	RGRTFLQKH	33.9208	37.6846	77.0004
renca_262	1	156064881	A	C	0/1	Tor1aip2	ENSMUSG00000050565	ENSMUST00000060404	309-317	502	311	K/T	missense_variant	35895	28.2219	GRTFLQKHL	50.883	32.1419	17.8272
renca_263	1	156064881	A	C	0/1	Tor1aip2	ENSMUSG00000050565	ENSMUST00000060404	310-318	502	311	K/T	missense_variant	35895	28.2219	RTFLQKHLN	25.1275	29.4978	48.1092
renca_264	1	156064881	A	C	0/1	Tor1aip2	ENSMUSG00000050565	ENSMUST00000060404	311-319	502	311	K/T	missense_variant	35895	28.2219	TFLQKHLNA	51.1373	15.3204	7.3434
renca_265	1	162709592	T	G	0/1	Prrc2c	ENSMUSG00000040225	ENSMUST00000028016	621-629	2844	629	Q/H	missense_variant	35980	16.2046	EAEPESGAH	92.5594	88.183	96.696
renca_266	1	162709592	T	G	0/1	Prrc2c	ENSMUSG00000040225	ENSMUST00000028016	622-630	2844	629	Q/H	missense_variant	35980	16.2046	AEPESGAHP	80.4722	78.9405	70.6198
renca_267	1	162709592	T	G	0/1	Prrc2c	ENSMUSG00000040225	ENSMUST00000028016	623-631	2844	629	Q/H	missense_variant	35980	16.2046	EPESGAHPR	90.291	39.4586	95.4382
renca_268	1	162709592	T	G	0/1	Prrc2c	ENSMUSG00000040225	ENSMUST00000028016	624-632	2844	629	Q/H	missense_variant	35980	16.2046	PESGAHPRP	97.2441	95.4613	96.5357
renca_269	1	162709592	T	G	0/1	Prrc2c	ENSMUSG00000040225	ENSMUST00000028016	625-633	2844	629	Q/H	missense_variant	35980	16.2046	ESGAHPRPG	65.4495	59.375	75.5461
renca_270	1	162709592	T	G	0/1	Prrc2c	ENSMUSG00000040225	ENSMUST00000028016	626-634	2844	629	Q/H	missense_variant	35980	16.2046	SGAHPRPGY	23.9403	18.5427	61.6182
renca_271	1	162709592	T	G	0/1	Prrc2c	ENSMUSG00000040225	ENSMUST00000028016	627-635	2844	629	Q/H	missense_variant	35980	16.2046	GAHPRPGYF	6.4403	1.9871	11.69
renca_272	1	162709592	T	G	0/1	Prrc2c	ENSMUSG00000040225	ENSMUST00000028016	628-636	2844	629	Q/H	missense_variant	35980	16.2046	AHPRPGYFK	11.1058	21.6206	15.4677
renca_273	1	162709592	T	G	0/1	Prrc2c	ENSMUSG00000040225	ENSMUST00000028016	629-637	2844	629	Q/H	missense_variant	35980	16.2046	HPRPGYFKQ	83.459	5.2288	93.7857
renca_274	1	170005158	C	G	0/1	Ddr2	ENSMUSG00000026674	ENSMUST00000027985	103-111	854	111	G/A	missense_variant	50642	39.6187	QGRHAGGHA	47.6337	33.4488	46.1096
renca_275	1	170005158	C	G	0/1	Ddr2	ENSMUSG00000026674	ENSMUST00000027985	104-112	854	111	G/A	missense_variant	50642	39.6187	GRHAGGHAI	44.7606	12.4219	3.3185
renca_276	1	170005158	C	G	0/1	Ddr2	ENSMUSG00000026674	ENSMUST00000027985	105-113	854	111	G/A	missense_variant	50642	39.6187	RHAGGHAIE	52.3948	36.1451	17.5126
renca_277	1	170005158	C	G	0/1	Ddr2	ENSMUSG00000026674	ENSMUST00000027985	106-114	854	111	G/A	missense_variant	50642	39.6187	HAGGHAIEF	5.7803	1.323	22.3325
renca_278	1	170005158	C	G	0/1	Ddr2	ENSMUSG00000026674	ENSMUST00000027985	107-115	854	111	G/A	missense_variant	50642	39.6187	AGGHAIEFA	15.3736	35.7024	32.1167
renca_279	1	170005158	C	G	0/1	Ddr2	ENSMUSG00000026674	ENSMUST00000027985	108-116	854	111	G/A	missense_variant	50642	39.6187	GGHAIEFAP	33.6603	47.3907	51.1807
renca_280	1	170005158	C	G	0/1	Ddr2	ENSMUSG00000026674	ENSMUST00000027985	109-117	854	111	G/A	missense_variant	50642	39.6187	GHAIEFAPM	11.1585	5.4371	1.0743
renca_281	1	170005158	C	G	0/1	Ddr2	ENSMUSG00000026674	ENSMUST00000027985	110-118	854	111	G/A	missense_variant	50642	39.6187	HAIEFAPMY	20.6436	4.7301	42.285
renca_282	1	170005158	C	G	0/1	Ddr2	ENSMUSG00000026674	ENSMUST00000027985	111-119	854	111	G/A	missense_variant	50642	39.6187	AIEFAPMYK	49.476	38.0547	63.4403
renca_283	1	171601306	T	G	0/1	Ly9	ENSMUSG00000004707	ENSMUST00000004827	131-139	544	139	K/Q	missense_variant	1604	3.51527	FCTGASRRQ	95.3686	91.2437	93.8687
renca_284	1	171601306	T	G	0/1	Ly9	ENSMUSG00000004707	ENSMUST00000004827	132-140	544	139	K/Q	missense_variant	1604	3.51527	CTGASRRQT	59.6799	56.0062	45.8668
renca_285	1	171601306	T	G	0/1	Ly9	ENSMUSG00000004707	ENSMUST00000004827	133-141	544	139	K/Q	missense_variant	1604	3.51527	TGASRRQTA	11.3916	11.1309	16.4972
renca_286	1	171601306	T	G	0/1	Ly9	ENSMUSG00000004707	ENSMUST00000004827	134-142	544	139	K/Q	missense_variant	1604	3.51527	GASRRQTAA	37.0735	36	29.7116
renca_287	1	171601306	T	G	0/1	Ly9	ENSMUSG00000004707	ENSMUST00000004827	135-143	544	139	K/Q	missense_variant	1604	3.51527	ASRRQTAAG	26.7867	33.7091	39.5986
renca_288	1	171601306	T	G	0/1	Ly9	ENSMUSG00000004707	ENSMUST00000004827	136-144	544	139	K/Q	missense_variant	1604	3.51527	SRRQTAAGK	83.5359	51.768	51.5831
renca_289	1	171601306	T	G	0/1	Ly9	ENSMUSG00000004707	ENSMUST00000004827	137-145	544	139	K/Q	missense_variant	1604	3.51527	RRQTAAGKT	84.8719	73.7521	47.9099
renca_290	1	171601306	T	G	0/1	Ly9	ENSMUSG00000004707	ENSMUST00000004827	138-146	544	139	K/Q	missense_variant	1604	3.51527	RQTAAGKTV	27.5308	12.6321	2.2133
renca_291	1	171601306	T	G	0/1	Ly9	ENSMUSG00000004707	ENSMUST00000004827	139-147	544	139	K/Q	missense_variant	1604	3.51527	QTAAGKTVV	33.6146	22.5398	9.0449
renca_292	1	175896245	G	A	0/1	Exo1	ENSMUSG00000039748	ENSMUST00000039725	378-386	837	386	A/T	missense_variant	5118	4.40426	LEVNSVSHT	94.5814	62.2507	39.4062
renca_293	1	175896245	G	A	0/1	Exo1	ENSMUSG00000039748	ENSMUST00000039725	379-387	837	386	A/T	missense_variant	5118	4.40426	EVNSVSHTP	89.2254	58.8531	57.8342
renca_294	1	175896245	G	A	0/1	Exo1	ENSMUSG00000039748	ENSMUST00000039725	380-388	837	386	A/T	missense_variant	5118	4.40426	VNSVSHTPQ	45.8385	43.3811	47.4348
renca_295	1	175896245	G	A	0/1	Exo1	ENSMUSG00000039748	ENSMUST00000039725	381-389	837	386	A/T	missense_variant	5118	4.40426	NSVSHTPQL	4.8601	2.4126	5.0038
renca_296	1	175896245	G	A	0/1	Exo1	ENSMUSG00000039748	ENSMUST00000039725	382-390	837	386	A/T	missense_variant	5118	4.40426	SVSHTPQLK	62.5387	58.8625	54.7368
renca_297	1	175896245	G	A	0/1	Exo1	ENSMUSG00000039748	ENSMUST00000039725	383-391	837	386	A/T	missense_variant	5118	4.40426	VSHTPQLKE	47.4416	51.6397	79.0589
renca_298	1	175896245	G	A	0/1	Exo1	ENSMUSG00000039748	ENSMUST00000039725	384-392	837	386	A/T	missense_variant	5118	4.40426	SHTPQLKEK	67.4838	45.2711	19.1711
renca_299	1	175896245	G	A	0/1	Exo1	ENSMUSG00000039748	ENSMUST00000039725	385-393	837	386	A/T	missense_variant	5118	4.40426	HTPQLKEKP	35.9153	88.5422	74.3042
renca_300	1	175896245	G	A	0/1	Exo1	ENSMUSG00000039748	ENSMUST00000039725	386-394	837	386	A/T	missense_variant	5118	4.40426	TPQLKEKPS	89.713	18.5614	89.3652
renca_301	10	4369640	C	G	0/1	Zbtb2	ENSMUSG00000075327	ENSMUST00000100077	121-129	514	129	A/P	missense_variant	3263	3.20702	HPEQVFPLP	54.1262	10.6432	79.8412
renca_302	10	4369640	C	G	0/1	Zbtb2	ENSMUSG00000075327	ENSMUST00000100077	122-130	514	129	A/P	missense_variant	3263	3.20702	PEQVFPLPS	92.117	66.3116	87.5759
renca_303	10	4369640	C	G	0/1	Zbtb2	ENSMUSG00000075327	ENSMUST00000100077	123-131	514	129	A/P	missense_variant	3263	3.20702	EQVFPLPSS	84.6559	50.2287	47.1827
renca_304	10	4369640	C	G	0/1	Zbtb2	ENSMUSG00000075327	ENSMUST00000100077	124-132	514	129	A/P	missense_variant	3263	3.20702	QVFPLPSSL	18.517	1.433	3.9867
renca_305	10	4369640	C	G	0/1	Zbtb2	ENSMUSG00000075327	ENSMUST00000100077	125-133	514	129	A/P	missense_variant	3263	3.20702	VFPLPSSLY	10.7206	20.6804	44.9483
renca_306	10	4369640	C	G	0/1	Zbtb2	ENSMUSG00000075327	ENSMUST00000100077	126-134	514	129	A/P	missense_variant	3263	3.20702	FPLPSSLYG	35.4167	0.9883	19.6063
renca_307	10	4369640	C	G	0/1	Zbtb2	ENSMUSG00000075327	ENSMUST00000100077	127-135	514	129	A/P	missense_variant	3263	3.20702	PLPSSLYGI	11.0219	44.3423	22.6344
renca_308	10	4369640	C	G	0/1	Zbtb2	ENSMUSG00000075327	ENSMUST00000100077	128-136	514	129	A/P	missense_variant	3263	3.20702	LPSSLYGIQ	70.2953	9.0477	81.7021
renca_309	10	4369640	C	G	0/1	Zbtb2	ENSMUSG00000075327	ENSMUST00000100077	129-137	514	129	A/P	missense_variant	3263	3.20702	PSSLYGIQI	12.3172	30.3547	38.5888
renca_310	10	5240212	G	C	0/1	Syne1	ENSMUSG00000096054	ENSMUST00000215295	4041-4049	8799	4049	P/A	missense_variant	15003	2.68539	SAVQPDLKA	63.9732	43.7705	44.8414
renca_311	10	5240212	G	C	0/1	Syne1	ENSMUSG00000096054	ENSMUST00000215295	4042-4050	8799	4049	P/A	missense_variant	15003	2.68539	AVQPDLKAS	93.2066	69.6343	66.6831
renca_312	10	5240212	G	C	0/1	Syne1	ENSMUSG00000096054	ENSMUST00000215295	4043-4051	8799	4049	P/A	missense_variant	15003	2.68539	VQPDLKASP	48.7599	67.3808	41.4512
renca_313	10	5240212	G	C	0/1	Syne1	ENSMUSG00000096054	ENSMUST00000215295	4044-4052	8799	4049	P/A	missense_variant	15003	2.68539	QPDLKASPQ	88.1535	28.5345	95.7229
renca_314	10	5240212	G	C	0/1	Syne1	ENSMUSG00000096054	ENSMUST00000215295	4045-4053	8799	4049	P/A	missense_variant	15003	2.68539	PDLKASPQP	96.1871	96.7615	95.987
renca_315	10	5240212	G	C	0/1	Syne1	ENSMUSG00000096054	ENSMUST00000215295	4046-4054	8799	4049	P/A	missense_variant	15003	2.68539	DLKASPQPP	95.6705	76.8301	77.6181
renca_316	10	5240212	G	C	0/1	Syne1	ENSMUSG00000096054	ENSMUST00000215295	4047-4055	8799	4049	P/A	missense_variant	15003	2.68539	LKASPQPPL	35.265	9.1134	21.4035
renca_317	10	5240212	G	C	0/1	Syne1	ENSMUSG00000096054	ENSMUST00000215295	4048-4056	8799	4049	P/A	missense_variant	15003	2.68539	KASPQPPLS	43.0952	41.4798	59.02
renca_318	10	5240212	G	C	0/1	Syne1	ENSMUSG00000096054	ENSMUST00000215295	4049-4057	8799	4049	P/A	missense_variant	15003	2.68539	ASPQPPLSR	16.7968	62.9389	66.8693
renca_319	10	7590521	G	C	0/1	Lrp11	ENSMUSG00000019796	ENSMUST00000019931	149-157	483	157	G/A	missense_variant	4206	8.91837	YLFNCTARA	28.4308	18.4515	8.5811
renca_320	10	7590521	G	C	0/1	Lrp11	ENSMUSG00000019796	ENSMUST00000019931	150-158	483	157	G/A	missense_variant	4206	8.91837	LFNCTARAR	86.3071	47.3488	41.1954
renca_321	10	7590521	G	C	0/1	Lrp11	ENSMUSG00000019796	ENSMUST00000019931	151-159	483	157	G/A	missense_variant	4206	8.91837	FNCTARARS	51.1627	48.154	29.3192
renca_322	10	7590521	G	C	0/1	Lrp11	ENSMUSG00000019796	ENSMUST00000019931	152-160	483	157	G/A	missense_variant	4206	8.91837	NCTARARSV	53.7471	32.8887	41.6586
renca_323	10	7590521	G	C	0/1	Lrp11	ENSMUSG00000019796	ENSMUST00000019931	153-161	483	157	G/A	missense_variant	4206	8.91837	CTARARSVC	13.0376	38.7778	13.4415
renca_324	10	7590521	G	C	0/1	Lrp11	ENSMUSG00000019796	ENSMUST00000019931	154-162	483	157	G/A	missense_variant	4206	8.91837	TARARSVCK	32.0011	14.5113	47.9464
renca_325	10	7590521	G	C	0/1	Lrp11	ENSMUSG00000019796	ENSMUST00000019931	155-163	483	157	G/A	missense_variant	4206	8.91837	ARARSVCKF	19.2438	19.9715	12.1952
renca_326	10	7590521	G	C	0/1	Lrp11	ENSMUSG00000019796	ENSMUST00000019931	156-164	483	157	G/A	missense_variant	4206	8.91837	RARSVCKFA	27.1864	10.647	17.6956
renca_327	10	7590521	G	C	0/1	Lrp11	ENSMUSG00000019796	ENSMUST00000019931	157-165	483	157	G/A	missense_variant	4206	8.91837	ARSVCKFAP	76.0679	56.2625	48.7152
renca_328	10	7798419	T	G	0/1	Ppil4	ENSMUSG00000015757	ENSMUST00000015901	101-109	492	109	L/R	missense_variant	8774	9.85885	SDQHGSQFR	76.7751	50.923	80.8861
renca_329	10	7798419	T	G	0/1	Ppil4	ENSMUSG00000015757	ENSMUST00000015901	102-110	492	109	L/R	missense_variant	8774	9.85885	DQHGSQFRI	31.2644	5.5365	11.3824
renca_330	10	7798419	T	G	0/1	Ppil4	ENSMUSG00000015757	ENSMUST00000015901	103-111	492	109	L/R	missense_variant	8774	9.85885	QHGSQFRIT	67.0116	44.4938	27.1594
renca_331	10	7798419	T	G	0/1	Ppil4	ENSMUSG00000015757	ENSMUST00000015901	104-112	492	109	L/R	missense_variant	8774	9.85885	HGSQFRITT	14.3114	11.7382	22.7171
renca_332	10	7798419	T	G	0/1	Ppil4	ENSMUSG00000015757	ENSMUST00000015901	105-113	492	109	L/R	missense_variant	8774	9.85885	GSQFRITTG	15.1882	40.8993	33.5763
renca_333	10	7798419	T	G	0/1	Ppil4	ENSMUSG00000015757	ENSMUST00000015901	106-114	492	109	L/R	missense_variant	8774	9.85885	SQFRITTGE	46.7221	29.7116	14.5469
renca_334	10	7798419	T	G	0/1	Ppil4	ENSMUSG00000015757	ENSMUST00000015901	107-115	492	109	L/R	missense_variant	8774	9.85885	QFRITTGEN	95.3165	66.4626	59.1576
renca_335	10	7798419	T	G	0/1	Ppil4	ENSMUSG00000015757	ENSMUST00000015901	108-116	492	109	L/R	missense_variant	8774	9.85885	FRITTGENL	22.8546	6.7693	1.7435
renca_336	10	7798419	T	G	0/1	Ppil4	ENSMUSG00000015757	ENSMUST00000015901	109-117	492	109	L/R	missense_variant	8774	9.85885	RITTGENLD	88.0083	95.2137	85.0293
renca_337	10	9899196	T	G	0/1	Stxbp5	ENSMUSG00000019790	ENSMUST00000038213	63-71	1152	71	K/T	missense_variant	7909	3.47123	ALAFDPVQT	83.0527	85.9691	62.21
renca_338	10	9899196	T	G	0/1	Stxbp5	ENSMUSG00000019790	ENSMUST00000038213	64-72	1152	71	K/T	missense_variant	7909	3.47123	LAFDPVQTI	6.7419	3.113	5.5044
renca_339	10	9899196	T	G	0/1	Stxbp5	ENSMUSG00000019790	ENSMUST00000038213	65-73	1152	71	K/T	missense_variant	7909	3.47123	AFDPVQTIL	11.1576	7.07	1.6042
renca_340	10	9899196	T	G	0/1	Stxbp5	ENSMUSG00000019790	ENSMUST00000038213	66-74	1152	71	K/T	missense_variant	7909	3.47123	FDPVQTILA	21.5598	38.547	64.3113
renca_341	10	9899196	T	G	0/1	Stxbp5	ENSMUSG00000019790	ENSMUST00000038213	67-75	1152	71	K/T	missense_variant	7909	3.47123	DPVQTILAV	50.4646	4.1433	27.4126
renca_342	10	9899196	T	G	0/1	Stxbp5	ENSMUSG00000019790	ENSMUST00000038213	68-76	1152	71	K/T	missense_variant	7909	3.47123	PVQTILAVG	85.9613	74.8005	69.4797
renca_343	10	9899196	T	G	0/1	Stxbp5	ENSMUSG00000019790	ENSMUST00000038213	69-77	1152	71	K/T	missense_variant	7909	3.47123	VQTILAVGT	71.6758	59.8937	46.3123
renca_344	10	9899196	T	G	0/1	Stxbp5	ENSMUSG00000019790	ENSMUST00000038213	70-78	1152	71	K/T	missense_variant	7909	3.47123	QTILAVGTQ	74.1312	71.6299	68.5597
renca_345	10	9899196	T	G	0/1	Stxbp5	ENSMUSG00000019790	ENSMUST00000038213	71-79	1152	71	K/T	missense_variant	7909	3.47123	TILAVGTQT	88.5581	36.5741	28.3455
renca_346	10	12711496	G	C	0/1	Utrn	ENSMUSG00000019820	ENSMUST00000076817	924-932	3430	932	A/G	missense_variant	22105	9.36439	SESEKAAQG	84.6706	61.1271	71.116
renca_347	10	12711496	G	C	0/1	Utrn	ENSMUSG00000019820	ENSMUST00000076817	925-933	3430	932	A/G	missense_variant	22105	9.36439	ESEKAAQGS	83.4078	86.3576	89.8171
renca_348	10	12711496	G	C	0/1	Utrn	ENSMUSG00000019820	ENSMUST00000076817	926-934	3430	932	A/G	missense_variant	22105	9.36439	SEKAAQGSL	36.9336	4.456	18.0986
renca_349	10	12711496	G	C	0/1	Utrn	ENSMUSG00000019820	ENSMUST00000076817	927-935	3430	932	A/G	missense_variant	22105	9.36439	EKAAQGSLN	96.2531	93.6698	89.4164
renca_350	10	12711496	G	C	0/1	Utrn	ENSMUSG00000019820	ENSMUST00000076817	928-936	3430	932	A/G	missense_variant	22105	9.36439	KAAQGSLNA	29.7688	21.4873	16.6567
renca_351	10	12711496	G	C	0/1	Utrn	ENSMUSG00000019820	ENSMUST00000076817	929-937	3430	932	A/G	missense_variant	22105	9.36439	AAQGSLNAL	9.0146	1.3762	2.2826
renca_352	10	12711496	G	C	0/1	Utrn	ENSMUSG00000019820	ENSMUST00000076817	930-938	3430	932	A/G	missense_variant	22105	9.36439	AQGSLNALN	80.4356	71.753	44.8214
renca_353	10	12711496	G	C	0/1	Utrn	ENSMUSG00000019820	ENSMUST00000076817	931-939	3430	932	A/G	missense_variant	22105	9.36439	QGSLNALND	36.4011	69.5866	82.5769
renca_354	10	12711496	G	C	0/1	Utrn	ENSMUSG00000019820	ENSMUST00000076817	932-940	3430	932	A/G	missense_variant	22105	9.36439	GSLNALNDP	63.7708	87.0886	42.285
renca_355	10	12941546	C	T	0/1	Stx11	ENSMUSG00000039232	ENSMUST00000042861	137-145	287	145	E/K	missense_variant	543	0.934995	RAFQQAMYK	7.3176	5.6807	13.0131
renca_356	10	12941546	C	T	0/1	Stx11	ENSMUSG00000039232	ENSMUST00000042861	138-146	287	145	E/K	missense_variant	543	0.934995	AFQQAMYKY	56.6772	18.9298	44.3843
renca_357	10	12941546	C	T	0/1	Stx11	ENSMUSG00000039232	ENSMUST00000042861	139-147	287	145	E/K	missense_variant	543	0.934995	FQQAMYKYN	59.4312	27.0087	10.5483
renca_358	10	12941546	C	T	0/1	Stx11	ENSMUSG00000039232	ENSMUST00000042861	140-148	287	145	E/K	missense_variant	543	0.934995	QQAMYKYNQ	68.9263	42.9761	69.7755
renca_359	10	12941546	C	T	0/1	Stx11	ENSMUSG00000039232	ENSMUST00000042861	141-149	287	145	E/K	missense_variant	543	0.934995	QAMYKYNQA	25.7511	6.1978	12.4714
renca_360	10	12941546	C	T	0/1	Stx11	ENSMUSG00000039232	ENSMUST00000042861	142-150	287	145	E/K	missense_variant	543	0.934995	AMYKYNQAE	42.6924	30.776	30.7294
renca_361	10	12941546	C	T	0/1	Stx11	ENSMUSG00000039232	ENSMUST00000042861	143-151	287	145	E/K	missense_variant	543	0.934995	MYKYNQAEM	16.1778	1.9958	0.328
renca_362	10	12941546	C	T	0/1	Stx11	ENSMUSG00000039232	ENSMUST00000042861	144-152	287	145	E/K	missense_variant	543	0.934995	YKYNQAEMK	69.3629	55.1094	40.7487
renca_363	10	12941546	C	T	0/1	Stx11	ENSMUSG00000039232	ENSMUST00000042861	145-153	287	145	E/K	missense_variant	543	0.934995	KYNQAEMKQ	89.7026	77.3643	27.2878
renca_364	10	14684945	C	G	0/1	Vta1	ENSMUSG00000019868	ENSMUST00000149485	83-91	251	91	E/Q	missense_variant	6833	21.8834	EIVGCAHLQ	92.9068	76.3704	88.5767
renca_365	10	14684945	C	G	0/1	Vta1	ENSMUSG00000019868	ENSMUST00000149485	84-92	251	91	E/Q	missense_variant	6833	21.8834	IVGCAHLQN	70.261	51.2493	76.5782
renca_366	10	14684945	C	G	0/1	Vta1	ENSMUSG00000019868	ENSMUST00000149485	85-93	251	91	E/Q	missense_variant	6833	21.8834	VGCAHLQNY	10.9123	20.8635	49.8826
renca_367	10	14684945	C	G	0/1	Vta1	ENSMUSG00000019868	ENSMUST00000149485	86-94	251	91	E/Q	missense_variant	6833	21.8834	GCAHLQNYA	77.0509	75	44.8038
renca_368	10	14684945	C	G	0/1	Vta1	ENSMUSG00000019868	ENSMUST00000149485	87-95	251	91	E/Q	missense_variant	6833	21.8834	CAHLQNYAL	3.8903	0.707	5.7703
renca_369	10	14684945	C	G	0/1	Vta1	ENSMUSG00000019868	ENSMUST00000149485	88-96	251	91	E/Q	missense_variant	6833	21.8834	AHLQNYALK	27.5986	12.8674	3.1278
renca_370	10	14684945	C	G	0/1	Vta1	ENSMUSG00000019868	ENSMUST00000149485	89-97	251	91	E/Q	missense_variant	6833	21.8834	HLQNYALKM	18.7999	4.4393	28.6135
renca_371	10	14684945	C	G	0/1	Vta1	ENSMUSG00000019868	ENSMUST00000149485	90-98	251	91	E/Q	missense_variant	6833	21.8834	LQNYALKMF	20.0645	13.5793	20.1813
renca_372	10	14684945	C	G	0/1	Vta1	ENSMUSG00000019868	ENSMUST00000149485	91-99	251	91	E/Q	missense_variant	6833	21.8834	QNYALKMFL	2.728	0.5891	3.8037
renca_373	10	22371400	C	T	0/1	Raet1d	ENSMUSG00000078452	ENSMUST00000095795	117-125	249	125	P/L	missense_variant	1432	7.20224	HLQVTMIYL	15.8564	5.5503	16.5187
renca_374	10	22371400	C	T	0/1	Raet1d	ENSMUSG00000078452	ENSMUST00000095795	118-126	249	125	P/L	missense_variant	1432	7.20224	LQVTMIYLQ	65.8409	44.4834	40.9578
renca_375	10	22371400	C	T	0/1	Raet1d	ENSMUSG00000078452	ENSMUST00000095795	119-127	249	125	P/L	missense_variant	1432	7.20224	QVTMIYLQS	69.2012	50.3625	79.5294
renca_376	10	22371400	C	T	0/1	Raet1d	ENSMUSG00000078452	ENSMUST00000095795	120-128	249	125	P/L	missense_variant	1432	7.20224	VTMIYLQSQ	37.2219	34.2022	64.9432
renca_377	10	22371400	C	T	0/1	Raet1d	ENSMUSG00000078452	ENSMUST00000095795	121-129	249	125	P/L	missense_variant	1432	7.20224	TMIYLQSQG	49.369	43.7705	11.841
renca_378	10	22371400	C	T	0/1	Raet1d	ENSMUSG00000078452	ENSMUST00000095795	122-130	249	125	P/L	missense_variant	1432	7.20224	MIYLQSQGQ	75.3112	51.4194	81.112
renca_379	10	22371400	C	T	0/1	Raet1d	ENSMUSG00000078452	ENSMUST00000095795	123-131	249	125	P/L	missense_variant	1432	7.20224	IYLQSQGQT	81.8302	43.1639	1.3392
renca_380	10	22371400	C	T	0/1	Raet1d	ENSMUSG00000078452	ENSMUST00000095795	124-132	249	125	P/L	missense_variant	1432	7.20224	YLQSQGQTP	72.2871	55.6187	28.0599
renca_381	10	22371400	C	T	0/1	Raet1d	ENSMUSG00000078452	ENSMUST00000095795	125-133	249	125	P/L	missense_variant	1432	7.20224	LQSQGQTPS	79.1301	57.0219	24.7796
renca_382	10	22371418	C	T	0/1	Raet1d	ENSMUSG00000078452	ENSMUST00000095795	123-131	249	131	T/I	missense_variant	1432	7.20224	IYPQSQGQI	3.9362	12.2438	0.2965
renca_383	10	22371418	C	T	0/1	Raet1d	ENSMUSG00000078452	ENSMUST00000095795	124-132	249	131	T/I	missense_variant	1432	7.20224	YPQSQGQIP	78.2037	11.8912	63.2146
renca_384	10	22371418	C	T	0/1	Raet1d	ENSMUSG00000078452	ENSMUST00000095795	125-133	249	131	T/I	missense_variant	1432	7.20224	PQSQGQIPS	94.7417	91.3735	71.3669
renca_385	10	22371418	C	T	0/1	Raet1d	ENSMUSG00000078452	ENSMUST00000095795	126-134	249	131	T/I	missense_variant	1432	7.20224	QSQGQIPSA	45.5844	30.3827	39.1641
renca_386	10	22371418	C	T	0/1	Raet1d	ENSMUSG00000078452	ENSMUST00000095795	127-135	249	131	T/I	missense_variant	1432	7.20224	SQGQIPSAT	74.4815	49.936	19.4206
renca_387	10	22371418	C	T	0/1	Raet1d	ENSMUSG00000078452	ENSMUST00000095795	128-136	249	131	T/I	missense_variant	1432	7.20224	QGQIPSATW	1.2754	6.3165	31.5972
renca_388	10	22371418	C	T	0/1	Raet1d	ENSMUSG00000078452	ENSMUST00000095795	129-137	249	131	T/I	missense_variant	1432	7.20224	GQIPSATWE	75.8168	59.6313	24.5586
renca_389	10	22371418	C	T	0/1	Raet1d	ENSMUSG00000078452	ENSMUST00000095795	130-138	249	131	T/I	missense_variant	1432	7.20224	QIPSATWEF	1.2048	3.5375	18.8601
renca_390	10	22371418	C	T	0/1	Raet1d	ENSMUSG00000078452	ENSMUST00000095795	131-139	249	131	T/I	missense_variant	1432	7.20224	IPSATWEFN	41.9918	2.8122	61.6265
renca_391	10	30647592	C	G	0/1	Ncoa7	ENSMUSG00000039697	ENSMUST00000068567	911-919	943	919	S/T	missense_variant	4254	2.91821	YHGRSNSCT	54.2164	56.2313	9.6549
renca_392	10	30647592	C	G	0/1	Ncoa7	ENSMUSG00000039697	ENSMUST00000068567	912-920	943	919	S/T	missense_variant	4254	2.91821	HGRSNSCTT	22.9244	20.2037	17.8437
renca_393	10	30647592	C	G	0/1	Ncoa7	ENSMUSG00000039697	ENSMUST00000068567	913-921	943	919	S/T	missense_variant	4254	2.91821	GRSNSCTTF	27.7012	24.2745	6.3981
renca_394	10	30647592	C	G	0/1	Ncoa7	ENSMUSG00000039697	ENSMUST00000068567	914-922	943	919	S/T	missense_variant	4254	2.91821	RSNSCTTFN	24.8391	32.1905	22.9071
renca_395	10	30647592	C	G	0/1	Ncoa7	ENSMUSG00000039697	ENSMUST00000068567	915-923	943	919	S/T	missense_variant	4254	2.91821	SNSCTTFNN	40.8288	40.2734	51.8059
renca_396	10	30647592	C	G	0/1	Ncoa7	ENSMUSG00000039697	ENSMUST00000068567	916-924	943	919	S/T	missense_variant	4254	2.91821	NSCTTFNND	43.0138	54.8327	55.8364
renca_397	10	30647592	C	G	0/1	Ncoa7	ENSMUSG00000039697	ENSMUST00000068567	917-925	943	919	S/T	missense_variant	4254	2.91821	SCTTFNNDI	33.9988	25.9354	21.524
renca_398	10	30647592	C	G	0/1	Ncoa7	ENSMUSG00000039697	ENSMUST00000068567	918-926	943	919	S/T	missense_variant	4254	2.91821	CTTFNNDIL	2.9803	17.9429	8.9042
renca_399	10	30647592	C	G	0/1	Ncoa7	ENSMUSG00000039697	ENSMUST00000068567	919-927	943	919	S/T	missense_variant	4254	2.91821	TTFNNDILS	37.0458	35.7525	44.4947
renca_400	10	34298609	A	C	0/1	Tspyl4	ENSMUSG00000039485	ENSMUST00000047935	358-366	406	366	K/Q	missense_variant	4442	8.29941	FDRIAEIIQ	93.7292	67.3609	96.5243
renca_401	10	34298609	A	C	0/1	Tspyl4	ENSMUSG00000039485	ENSMUST00000047935	359-367	406	366	K/Q	missense_variant	4442	8.29941	DRIAEIIQG	92.3931	78.1961	77.7885
renca_402	10	34298609	A	C	0/1	Tspyl4	ENSMUSG00000039485	ENSMUST00000047935	360-368	406	366	K/Q	missense_variant	4442	8.29941	RIAEIIQGE	70.7967	60.1053	61.5279
renca_403	10	34298609	A	C	0/1	Tspyl4	ENSMUSG00000039485	ENSMUST00000047935	361-369	406	366	K/Q	missense_variant	4442	8.29941	IAEIIQGEL	9.8831	2.5643	17.69
renca_404	10	34298609	A	C	0/1	Tspyl4	ENSMUSG00000039485	ENSMUST00000047935	362-370	406	366	K/Q	missense_variant	4442	8.29941	AEIIQGELW	28.3771	14.0487	33.4407
renca_405	10	34298609	A	C	0/1	Tspyl4	ENSMUSG00000039485	ENSMUST00000047935	363-371	406	366	K/Q	missense_variant	4442	8.29941	EIIQGELWS	95.6094	82.5339	81.5009
renca_406	10	34298609	A	C	0/1	Tspyl4	ENSMUSG00000039485	ENSMUST00000047935	364-372	406	366	K/Q	missense_variant	4442	8.29941	IIQGELWSN	79.8479	60.8076	81.4972
renca_407	10	34298609	A	C	0/1	Tspyl4	ENSMUSG00000039485	ENSMUST00000047935	365-373	406	366	K/Q	missense_variant	4442	8.29941	IQGELWSNP	55.8333	37.7239	26.6749
renca_408	10	34298609	A	C	0/1	Tspyl4	ENSMUSG00000039485	ENSMUST00000047935	366-374	406	366	K/Q	missense_variant	4442	8.29941	QGELWSNPL	2.4742	2.4109	13.0404
renca_409	10	40142030	G	C	0/1	Slc16a10	ENSMUSG00000019838	ENSMUST00000092566	2019-01-09	512	3	P/A	missense_variant	13623	13.4221	MVASQEEPA	56.0159	37.8366	25.5225
renca_410	10	40142030	G	C	0/1	Slc16a10	ENSMUSG00000019838	ENSMUST00000092566	2019-02-10	512	3	P/A	missense_variant	13623	13.4221	VASQEEPAA	60.494	42.8147	65.5495
renca_411	10	40142030	G	C	0/1	Slc16a10	ENSMUSG00000019838	ENSMUST00000092566	2019-03-11	512	3	P/A	missense_variant	13623	13.4221	ASQEEPAAE	68.2697	70.1868	77.4845
renca_412	10	42696277	A	C	0/1	Ostm1	ENSMUSG00000038280	ENSMUST00000040718	211-219	338	219	K/Q	missense_variant	14736	14.8106	HTYSLLPPQ	40	30.2427	36.3419
renca_413	10	42696277	A	C	0/1	Ostm1	ENSMUSG00000038280	ENSMUST00000040718	212-220	338	219	K/Q	missense_variant	14736	14.8106	TYSLLPPQN	87.3064	63.1461	18.3901
renca_414	10	42696277	A	C	0/1	Ostm1	ENSMUSG00000038280	ENSMUST00000040718	213-221	338	219	K/Q	missense_variant	14736	14.8106	YSLLPPQNY	34.2838	15.9022	50.5054
renca_415	10	42696277	A	C	0/1	Ostm1	ENSMUSG00000038280	ENSMUST00000040718	214-222	338	219	K/Q	missense_variant	14736	14.8106	SLLPPQNYS	65.3072	36.9444	16.1891
renca_416	10	42696277	A	C	0/1	Ostm1	ENSMUSG00000038280	ENSMUST00000040718	215-223	338	219	K/Q	missense_variant	14736	14.8106	LLPPQNYSE	38.4766	58.2781	76.7564
renca_417	10	42696277	A	C	0/1	Ostm1	ENSMUSG00000038280	ENSMUST00000040718	216-224	338	219	K/Q	missense_variant	14736	14.8106	LPPQNYSEV	2.8826	0.4999	6.2089
renca_418	10	42696277	A	C	0/1	Ostm1	ENSMUSG00000038280	ENSMUST00000040718	217-225	338	219	K/Q	missense_variant	14736	14.8106	PPQNYSEVC	70.3846	32.665	95.455
renca_419	10	42696277	A	C	0/1	Ostm1	ENSMUSG00000038280	ENSMUST00000040718	218-226	338	219	K/Q	missense_variant	14736	14.8106	PQNYSEVCR	94.7714	88.7218	85.1116
renca_420	10	42696277	A	C	0/1	Ostm1	ENSMUSG00000038280	ENSMUST00000040718	219-227	338	219	K/Q	missense_variant	14736	14.8106	QNYSEVCRN	57.9206	73.5993	75.1239
renca_421	10	43510632	A	T	0/1	Bend3	ENSMUSG00000038214	ENSMUST00000040147	332-340	825	340	R/S	missense_variant	3647	3.87617	FFSRFWAQS	33.5006	22.2159	12.0599
renca_422	10	43510632	A	T	0/1	Bend3	ENSMUSG00000038214	ENSMUST00000040147	333-341	825	340	R/S	missense_variant	3647	3.87617	FSRFWAQSE	35.5041	30.4201	52.4032
renca_423	10	43510632	A	T	0/1	Bend3	ENSMUSG00000038214	ENSMUST00000040147	334-342	825	340	R/S	missense_variant	3647	3.87617	SRFWAQSEM	15.4782	1.9137	1.9937
renca_424	10	43510632	A	T	0/1	Bend3	ENSMUSG00000038214	ENSMUST00000040147	335-343	825	340	R/S	missense_variant	3647	3.87617	RFWAQSEME	64.6458	38.2462	25.1335
renca_425	10	43510632	A	T	0/1	Bend3	ENSMUSG00000038214	ENSMUST00000040147	336-344	825	340	R/S	missense_variant	3647	3.87617	FWAQSEMED	80.8602	88.4002	35.7307
renca_426	10	43510632	A	T	0/1	Bend3	ENSMUSG00000038214	ENSMUST00000040147	337-345	825	340	R/S	missense_variant	3647	3.87617	WAQSEMEDS	77.256	69.221	72.7129
renca_427	10	43510632	A	T	0/1	Bend3	ENSMUSG00000038214	ENSMUST00000040147	338-346	825	340	R/S	missense_variant	3647	3.87617	AQSEMEDSQ	85.1763	89.0434	61.7369
renca_428	10	43510632	A	T	0/1	Bend3	ENSMUSG00000038214	ENSMUST00000040147	339-347	825	340	R/S	missense_variant	3647	3.87617	QSEMEDSQP	84.623	96.514	94.6695
renca_429	10	43510632	A	T	0/1	Bend3	ENSMUSG00000038214	ENSMUST00000040147	340-348	825	340	R/S	missense_variant	3647	3.87617	SEMEDSQPG	79.9753	38.5214	33.6282
renca_430	10	44003579	G	C	0/1	Crybg1	ENSMUSG00000019866	ENSMUST00000020017	156-164	1691	164	P/A	missense_variant	12113	11.6663	SSLLPEIKA	40.8399	40.6151	42.0342
renca_431	10	44003579	G	C	0/1	Crybg1	ENSMUSG00000019866	ENSMUST00000020017	157-165	1691	164	P/A	missense_variant	12113	11.6663	SLLPEIKAE	88.2503	74.4864	68.9759
renca_432	10	44003579	G	C	0/1	Crybg1	ENSMUSG00000019866	ENSMUST00000020017	158-166	1691	164	P/A	missense_variant	12113	11.6663	LLPEIKAEH	63.2143	71.2351	85.086
renca_433	10	44003579	G	C	0/1	Crybg1	ENSMUSG00000019866	ENSMUST00000020017	159-167	1691	164	P/A	missense_variant	12113	11.6663	LPEIKAEHK	81.8924	22.9898	90.996
renca_434	10	44003579	G	C	0/1	Crybg1	ENSMUSG00000019866	ENSMUST00000020017	160-168	1691	164	P/A	missense_variant	12113	11.6663	PEIKAEHKR	97.2701	95.1777	95.731
renca_435	10	44003579	G	C	0/1	Crybg1	ENSMUSG00000019866	ENSMUST00000020017	161-169	1691	164	P/A	missense_variant	12113	11.6663	EIKAEHKRG	96.2368	89.7201	96.6501
renca_436	10	44003579	G	C	0/1	Crybg1	ENSMUSG00000019866	ENSMUST00000020017	162-170	1691	164	P/A	missense_variant	12113	11.6663	IKAEHKRGP	95.8104	95.2899	86.4618
renca_437	10	44003579	G	C	0/1	Crybg1	ENSMUSG00000019866	ENSMUST00000020017	163-171	1691	164	P/A	missense_variant	12113	11.6663	KAEHKRGPL	13.0302	6.7954	14.416
renca_438	10	44003579	G	C	0/1	Crybg1	ENSMUSG00000019866	ENSMUST00000020017	164-172	1691	164	P/A	missense_variant	12113	11.6663	AEHKRGPLP	80.754	48.3636	66.5206
renca_439	10	50649893	G	A	0/1	Ascc3	ENSMUSG00000038774	ENSMUST00000035606	559-567	2198	567	G/E	missense_variant	19610	8.51804	GIVVKELTE	91.7815	93.0498	90.289
renca_440	10	50649893	G	A	0/1	Ascc3	ENSMUSG00000038774	ENSMUST00000035606	560-568	2198	567	G/E	missense_variant	19610	8.51804	IVVKELTED	84.257	87.8112	72.8308
renca_441	10	50649893	G	A	0/1	Ascc3	ENSMUSG00000038774	ENSMUST00000035606	561-569	2198	567	G/E	missense_variant	19610	8.51804	VVKELTEDM	39.0442	7.2182	30.25
renca_442	10	50649893	G	A	0/1	Ascc3	ENSMUSG00000038774	ENSMUST00000035606	562-570	2198	567	G/E	missense_variant	19610	8.51804	VKELTEDMQ	96.3678	96.1987	97.517
renca_443	10	50649893	G	A	0/1	Ascc3	ENSMUSG00000038774	ENSMUST00000035606	563-571	2198	567	G/E	missense_variant	19610	8.51804	KELTEDMQL	48.9457	10.2086	31.5292
renca_444	10	50649893	G	A	0/1	Ascc3	ENSMUSG00000038774	ENSMUST00000035606	564-572	2198	567	G/E	missense_variant	19610	8.51804	ELTEDMQLS	95.3401	94.9135	83.1499
renca_445	10	50649893	G	A	0/1	Ascc3	ENSMUSG00000038774	ENSMUST00000035606	565-573	2198	567	G/E	missense_variant	19610	8.51804	LTEDMQLSK	54.3158	50.3179	68.9814
renca_446	10	50649893	G	A	0/1	Ascc3	ENSMUSG00000038774	ENSMUST00000035606	566-574	2198	567	G/E	missense_variant	19610	8.51804	TEDMQLSKS	86.8914	74.0535	81.7533
renca_447	10	50649893	G	A	0/1	Ascc3	ENSMUSG00000038774	ENSMUST00000035606	567-575	2198	567	G/E	missense_variant	19610	8.51804	EDMQLSKSE	95.0301	71.3158	90.3551
renca_448	10	58414016	G	A	0/1	Lims1	ENSMUSG00000019920	ENSMUST00000020077	284-292	396	292	R/H	missense_variant	20614	30.5459	CEKPFLGHH	91.6419	58.4031	91.4248
renca_449	10	58414016	G	A	0/1	Lims1	ENSMUSG00000019920	ENSMUST00000020077	285-293	396	292	R/H	missense_variant	20614	30.5459	EKPFLGHHH	95.533	92.7902	96.4238
renca_450	10	58414016	G	A	0/1	Lims1	ENSMUSG00000019920	ENSMUST00000020077	286-294	396	292	R/H	missense_variant	20614	30.5459	KPFLGHHHY	28.8567	0.1713	40.3889
renca_451	10	58414016	G	A	0/1	Lims1	ENSMUSG00000019920	ENSMUST00000020077	287-295	396	292	R/H	missense_variant	20614	30.5459	PFLGHHHYE	82.877	55.2781	51.9451
renca_452	10	58414016	G	A	0/1	Lims1	ENSMUSG00000019920	ENSMUST00000020077	288-296	396	292	R/H	missense_variant	20614	30.5459	FLGHHHYER	43.5433	23.4549	55.6655
renca_453	10	58414016	G	A	0/1	Lims1	ENSMUSG00000019920	ENSMUST00000020077	289-297	396	292	R/H	missense_variant	20614	30.5459	LGHHHYERK	8.3017	20.0878	39.9228
renca_454	10	58414016	G	A	0/1	Lims1	ENSMUSG00000019920	ENSMUST00000020077	290-298	396	292	R/H	missense_variant	20614	30.5459	GHHHYERKG	88.0775	89.0685	59.3451
renca_455	10	58414016	G	A	0/1	Lims1	ENSMUSG00000019920	ENSMUST00000020077	291-299	396	292	R/H	missense_variant	20614	30.5459	HHHYERKGL	37.7184	12.2903	6.1848
renca_456	10	58414016	G	A	0/1	Lims1	ENSMUSG00000019920	ENSMUST00000020077	292-300	396	292	R/H	missense_variant	20614	30.5459	HHYERKGLA	33.6555	15.4881	5.6278
renca_457	10	58454702	A	C	0/1	Ranbp2	ENSMUSG00000003226	ENSMUST00000003310	120-128	3053	128	S/R	missense_variant	55114	34.0586	RAAKLFPGR	17.1908	22.0095	35.7635
renca_458	10	58454702	A	C	0/1	Ranbp2	ENSMUSG00000003226	ENSMUST00000003310	121-129	3053	128	S/R	missense_variant	55114	34.0586	AAKLFPGRP	60.0476	59.8688	67.4224
renca_459	10	58454702	A	C	0/1	Ranbp2	ENSMUSG00000003226	ENSMUST00000003310	122-130	3053	128	S/R	missense_variant	55114	34.0586	AKLFPGRPA	84.817	34.5941	26.9369
renca_460	10	58454702	A	C	0/1	Ranbp2	ENSMUSG00000003226	ENSMUST00000003310	123-131	3053	128	S/R	missense_variant	55114	34.0586	KLFPGRPAI	9.4876	3.012	1.3781
renca_461	10	58454702	A	C	0/1	Ranbp2	ENSMUSG00000003226	ENSMUST00000003310	124-132	3053	128	S/R	missense_variant	55114	34.0586	LFPGRPAIY	20.8365	31.1856	58.6933
renca_462	10	58454702	A	C	0/1	Ranbp2	ENSMUSG00000003226	ENSMUST00000003310	125-133	3053	128	S/R	missense_variant	55114	34.0586	FPGRPAIYK	49.2009	5.6165	56.6394
renca_463	10	58454702	A	C	0/1	Ranbp2	ENSMUSG00000003226	ENSMUST00000003310	126-134	3053	128	S/R	missense_variant	55114	34.0586	PGRPAIYKL	6.0888	7.1463	34.9078
renca_464	10	58454702	A	C	0/1	Ranbp2	ENSMUSG00000003226	ENSMUST00000003310	127-135	3053	128	S/R	missense_variant	55114	34.0586	GRPAIYKLK	49.1616	61.6819	51.8254
renca_465	10	58454702	A	C	0/1	Ranbp2	ENSMUSG00000003226	ENSMUST00000003310	128-136	3053	128	S/R	missense_variant	55114	34.0586	RPAIYKLKE	68.1468	6.8539	90.8408
renca_466	10	59467733	T	C	0/1	Mcu	ENSMUSG00000009647	ENSMUST00000020312	86-94	350	94	E/G	missense_variant	8556	8.94026	SVRLPSRRG	66.4845	37.9918	71.9373
renca_467	10	59467733	T	C	0/1	Mcu	ENSMUSG00000009647	ENSMUST00000020312	87-95	350	94	E/G	missense_variant	8556	8.94026	VRLPSRRGR	93.5956	49.392	70.2814
renca_468	10	59467733	T	C	0/1	Mcu	ENSMUSG00000009647	ENSMUST00000020312	88-96	350	94	E/G	missense_variant	8556	8.94026	RLPSRRGRC	13.8754	42.4861	39.7383
renca_469	10	59467733	T	C	0/1	Mcu	ENSMUSG00000009647	ENSMUST00000020312	89-97	350	94	E/G	missense_variant	8556	8.94026	LPSRRGRCQ	88.2538	31.7626	95.2741
renca_470	10	59467733	T	C	0/1	Mcu	ENSMUSG00000009647	ENSMUST00000020312	90-98	350	94	E/G	missense_variant	8556	8.94026	PSRRGRCQF	17.4369	22.7608	37.4689
renca_471	10	59467733	T	C	0/1	Mcu	ENSMUSG00000009647	ENSMUST00000020312	91-99	350	94	E/G	missense_variant	8556	8.94026	SRRGRCQFT	64.5327	45.5011	42.1368
renca_472	10	59467733	T	C	0/1	Mcu	ENSMUSG00000009647	ENSMUST00000020312	92-100	350	94	E/G	missense_variant	8556	8.94026	RRGRCQFTL	5.8947	5.1803	9.1323
renca_473	10	59467733	T	C	0/1	Mcu	ENSMUSG00000009647	ENSMUST00000020312	93-101	350	94	E/G	missense_variant	8556	8.94026	RGRCQFTLK	2.8876	9.1478	21.7248
renca_474	10	59467733	T	C	0/1	Mcu	ENSMUSG00000009647	ENSMUST00000020312	94-102	350	94	E/G	missense_variant	8556	8.94026	GRCQFTLKP	87.8734	90.6453	67.7839
renca_475	10	75246183	T	G	0/1	Specc1l	ENSMUSG00000033444	ENSMUST00000040105	480-488	1135	488	L/R	missense_variant	18858	10.3033	QIEYFRSLR	55.8651	45.8178	78.9543
renca_476	10	75246183	T	G	0/1	Specc1l	ENSMUSG00000033444	ENSMUST00000040105	481-489	1135	488	L/R	missense_variant	18858	10.3033	IEYFRSLRD	58.8519	35.1602	75.8191
renca_477	10	75246183	T	G	0/1	Specc1l	ENSMUSG00000033444	ENSMUST00000040105	482-490	1135	488	L/R	missense_variant	18858	10.3033	EYFRSLRDE	88.9938	53.7507	18.5744
renca_478	10	75246183	T	G	0/1	Specc1l	ENSMUSG00000033444	ENSMUST00000040105	483-491	1135	488	L/R	missense_variant	18858	10.3033	YFRSLRDEH	83.0161	32.3849	33.3156
renca_479	10	75246183	T	G	0/1	Specc1l	ENSMUSG00000033444	ENSMUST00000040105	484-492	1135	488	L/R	missense_variant	18858	10.3033	FRSLRDEHH	90.1603	82.9359	89.0121
renca_480	10	75246183	T	G	0/1	Specc1l	ENSMUSG00000033444	ENSMUST00000040105	485-493	1135	488	L/R	missense_variant	18858	10.3033	RSLRDEHHI	5.0133	14.1192	4.224
renca_481	10	75246183	T	G	0/1	Specc1l	ENSMUSG00000033444	ENSMUST00000040105	486-494	1135	488	L/R	missense_variant	18858	10.3033	SLRDEHHIS	82.6171	56.3906	64.5353
renca_482	10	75246183	T	G	0/1	Specc1l	ENSMUSG00000033444	ENSMUST00000040105	487-495	1135	488	L/R	missense_variant	18858	10.3033	LRDEHHISY	36.3817	15.9338	63.3952
renca_483	10	75246183	T	G	0/1	Specc1l	ENSMUSG00000033444	ENSMUST00000040105	488-496	1135	488	L/R	missense_variant	18858	10.3033	RDEHHISYV	25.3961	21.5351	31.5083
renca_484	10	79762229	G	C	0/1	Rnf126	ENSMUSG00000035890	ENSMUST00000047203	92-100	313	100	A/G	missense_variant	6014	25.5789	EIPTFPPGG	60.4375	67.4404	87.4936
renca_485	10	79762229	G	C	0/1	Rnf126	ENSMUSG00000035890	ENSMUST00000047203	93-101	313	100	A/G	missense_variant	6014	25.5789	IPTFPPGGQ	95.0098	32.9501	96.0994
renca_486	10	79762229	G	C	0/1	Rnf126	ENSMUSG00000035890	ENSMUST00000047203	94-102	313	100	A/G	missense_variant	6014	25.5789	PTFPPGGQA	76.2376	57.6281	70.1578
renca_487	10	79762229	G	C	0/1	Rnf126	ENSMUSG00000035890	ENSMUST00000047203	95-103	313	100	A/G	missense_variant	6014	25.5789	TFPPGGQAD	69.6119	77.0096	61.1117
renca_488	10	79762229	G	C	0/1	Rnf126	ENSMUSG00000035890	ENSMUST00000047203	96-104	313	100	A/G	missense_variant	6014	25.5789	FPPGGQADD	72.0948	65.4094	95.2818
renca_489	10	79762229	G	C	0/1	Rnf126	ENSMUSG00000035890	ENSMUST00000047203	97-105	313	100	A/G	missense_variant	6014	25.5789	PPGGQADDG	97.86	96.9573	98.9154
renca_490	10	79762229	G	C	0/1	Rnf126	ENSMUSG00000035890	ENSMUST00000047203	98-106	313	100	A/G	missense_variant	6014	25.5789	PGGQADDGR	94.3943	97.0652	96.9658
renca_491	10	79762229	G	C	0/1	Rnf126	ENSMUSG00000035890	ENSMUST00000047203	99-107	313	100	A/G	missense_variant	6014	25.5789	GGQADDGRD	93.9905	97.7232	97.3912
renca_492	10	79762229	G	C	0/1	Rnf126	ENSMUSG00000035890	ENSMUST00000047203	100-108	313	100	A/G	missense_variant	6014	25.5789	GQADDGRDP	97.4369	97.262	84.3871
renca_493	10	79903403	T	G	0/1	Med16	ENSMUSG00000013833	ENSMUST00000105378	174-182	864	182	K/T	missense_variant	1383	2.14954	SGASSFGET	10.2279	17.6493	12.3067
renca_494	10	79903403	T	G	0/1	Med16	ENSMUSG00000013833	ENSMUST00000105378	175-183	864	182	K/T	missense_variant	1383	2.14954	GASSFGETF	3.7785	2.7101	8.0108
renca_495	10	79903403	T	G	0/1	Med16	ENSMUSG00000013833	ENSMUST00000105378	176-184	864	182	K/T	missense_variant	1383	2.14954	ASSFGETFS	39.9832	53.2236	37.3965
renca_496	10	79903403	T	G	0/1	Med16	ENSMUSG00000013833	ENSMUST00000105378	177-185	864	182	K/T	missense_variant	1383	2.14954	SSFGETFSR	14.3359	14.7454	28.0995
renca_497	10	79903403	T	G	0/1	Med16	ENSMUSG00000013833	ENSMUST00000105378	178-186	864	182	K/T	missense_variant	1383	2.14954	SFGETFSRV	20.1622	11.6504	0.6282
renca_498	10	79903403	T	G	0/1	Med16	ENSMUSG00000013833	ENSMUST00000105378	179-187	864	182	K/T	missense_variant	1383	2.14954	FGETFSRVK	18.4741	29.3925	43.546
renca_499	10	79903403	T	G	0/1	Med16	ENSMUSG00000013833	ENSMUST00000105378	180-188	864	182	K/T	missense_variant	1383	2.14954	GETFSRVKF	45.8276	14.041	47.9695
renca_500	10	79903403	T	G	0/1	Med16	ENSMUSG00000013833	ENSMUST00000105378	181-189	864	182	K/T	missense_variant	1383	2.14954	ETFSRVKFS	52.6098	35.6695	58.6373
renca_501	10	79903403	T	G	0/1	Med16	ENSMUSG00000013833	ENSMUST00000105378	182-190	864	182	K/T	missense_variant	1383	2.14954	TFSRVKFSP	63.7976	41.9403	13.1361
renca_502	10	79960251	A	T	0/1	Wdr18	ENSMUSG00000035754	ENSMUST00000045247	22-30	431	30	N/I	missense_variant	9664	11.6636	VWELHSGAI	14.6203	13.451	3.8941
renca_503	10	79960251	A	T	0/1	Wdr18	ENSMUSG00000035754	ENSMUST00000045247	23-31	431	30	N/I	missense_variant	9664	11.6636	WELHSGAIL	31.2218	3.5457	8.5549
renca_504	10	79960251	A	T	0/1	Wdr18	ENSMUSG00000035754	ENSMUST00000045247	24-32	431	30	N/I	missense_variant	9664	11.6636	ELHSGAILL	25.8084	7.1548	19.1872
renca_505	10	79960251	A	T	0/1	Wdr18	ENSMUSG00000035754	ENSMUST00000045247	25-33	431	30	N/I	missense_variant	9664	11.6636	LHSGAILLT	45.1706	30.9113	13.9279
renca_506	10	79960251	A	T	0/1	Wdr18	ENSMUSG00000035754	ENSMUST00000045247	26-34	431	30	N/I	missense_variant	9664	11.6636	HSGAILLTY	21.125	18.2889	52.6511
renca_507	10	79960251	A	T	0/1	Wdr18	ENSMUSG00000035754	ENSMUST00000045247	27-35	431	30	N/I	missense_variant	9664	11.6636	SGAILLTYR	10.369	17.726	19.2514
renca_508	10	79960251	A	T	0/1	Wdr18	ENSMUSG00000035754	ENSMUST00000045247	28-36	431	30	N/I	missense_variant	9664	11.6636	GAILLTYRG	39.9436	37.7386	41.4391
renca_509	10	79960251	A	T	0/1	Wdr18	ENSMUSG00000035754	ENSMUST00000045247	29-37	431	30	N/I	missense_variant	9664	11.6636	AILLTYRGG	67.61	49.4827	49.8396
renca_510	10	79960251	A	T	0/1	Wdr18	ENSMUSG00000035754	ENSMUST00000045247	30-38	431	30	N/I	missense_variant	9664	11.6636	ILLTYRGGQ	83.8543	54.0965	81.0474
renca_511	10	80153897	C	G	0/1	Midn	ENSMUSG00000035621	ENSMUST00000042057	192-200	508	200	L/V	missense_variant	4328	7.28284	HMMFVQLQV	13.4879	3.7603	2.6727
renca_512	10	80153897	C	G	0/1	Midn	ENSMUSG00000035621	ENSMUST00000042057	193-201	508	200	L/V	missense_variant	4328	7.28284	MMFVQLQVA	25.2866	13.8152	9.819
renca_513	10	80153897	C	G	0/1	Midn	ENSMUSG00000035621	ENSMUST00000042057	194-202	508	200	L/V	missense_variant	4328	7.28284	MFVQLQVAA	67.1831	25.3185	8.4163
renca_514	10	80153897	C	G	0/1	Midn	ENSMUSG00000035621	ENSMUST00000042057	195-203	508	200	L/V	missense_variant	4328	7.28284	FVQLQVAAQ	75.4173	51.2242	73.2909
renca_515	10	80153897	C	G	0/1	Midn	ENSMUSG00000035621	ENSMUST00000042057	196-204	508	200	L/V	missense_variant	4328	7.28284	VQLQVAAQH	81.7533	52.7217	60.5801
renca_516	10	80153897	C	G	0/1	Midn	ENSMUSG00000035621	ENSMUST00000042057	197-205	508	200	L/V	missense_variant	4328	7.28284	QLQVAAQHA	78.7306	46.4753	27.7974
renca_517	10	80153897	C	G	0/1	Midn	ENSMUSG00000035621	ENSMUST00000042057	198-206	508	200	L/V	missense_variant	4328	7.28284	LQVAAQHAP	75.9017	56.7281	20.1422
renca_518	10	80153897	C	G	0/1	Midn	ENSMUSG00000035621	ENSMUST00000042057	199-207	508	200	L/V	missense_variant	4328	7.28284	QVAAQHAPL	11.0775	2.9956	5.3582
renca_519	10	80153897	C	G	0/1	Midn	ENSMUSG00000035621	ENSMUST00000042057	200-208	508	200	L/V	missense_variant	4328	7.28284	VAAQHAPLQ	34.9678	26.0333	66.0935
renca_520	10	80238334	G	C	0/1	Mum1	ENSMUSG00000020156	ENSMUST00000020365	399-407	682	407	R/T	missense_variant	7828	5.47567	AVVKSVRRT	83.1772	72.8014	38.1645
renca_521	10	80238334	G	C	0/1	Mum1	ENSMUSG00000020156	ENSMUST00000020365	400-408	682	407	R/T	missense_variant	7828	5.47567	VVKSVRRTD	84.0337	55.9031	74.057
renca_522	10	80238334	G	C	0/1	Mum1	ENSMUSG00000020156	ENSMUST00000020365	401-409	682	407	R/T	missense_variant	7828	5.47567	VKSVRRTDK	89.6611	68.5175	82.8615
renca_523	10	80238334	G	C	0/1	Mum1	ENSMUSG00000020156	ENSMUST00000020365	402-410	682	407	R/T	missense_variant	7828	5.47567	KSVRRTDKK	18.8553	54.498	36.9115
renca_524	10	80238334	G	C	0/1	Mum1	ENSMUSG00000020156	ENSMUST00000020365	403-411	682	407	R/T	missense_variant	7828	5.47567	SVRRTDKKA	84.5864	56.1312	67.0957
renca_525	10	80238334	G	C	0/1	Mum1	ENSMUSG00000020156	ENSMUST00000020365	404-412	682	407	R/T	missense_variant	7828	5.47567	VRRTDKKAS	96.9544	92.6388	90.4165
renca_526	10	80238334	G	C	0/1	Mum1	ENSMUSG00000020156	ENSMUST00000020365	405-413	682	407	R/T	missense_variant	7828	5.47567	RRTDKKASV	48.7891	34.4603	24.2189
renca_527	10	80238334	G	C	0/1	Mum1	ENSMUSG00000020156	ENSMUST00000020365	406-414	682	407	R/T	missense_variant	7828	5.47567	RTDKKASVL	2.0145	8.3285	8.6943
renca_528	10	80238334	G	C	0/1	Mum1	ENSMUSG00000020156	ENSMUST00000020365	407-415	682	407	R/T	missense_variant	7828	5.47567	TDKKASVLF	16.8207	8.308	63.0993
renca_529	10	80287650	G	C	0/1	Dazap1	ENSMUSG00000069565	ENSMUST00000092305	379-387	406	387	G/A	missense_variant	14117	34.753	GSGGPPAGA	68.6481	86.015	76.0748
renca_530	10	80287650	G	C	0/1	Dazap1	ENSMUSG00000069565	ENSMUST00000092305	380-388	406	387	G/A	missense_variant	14117	34.753	SGGPPAGAS	35.3415	44.7905	55.9407
renca_531	10	80287650	G	C	0/1	Dazap1	ENSMUSG00000069565	ENSMUST00000092305	381-389	406	387	G/A	missense_variant	14117	34.753	GGPPAGASG	5.2632	52.8193	51.8351
renca_532	10	80287650	G	C	0/1	Dazap1	ENSMUSG00000069565	ENSMUST00000092305	382-390	406	387	G/A	missense_variant	14117	34.753	GPPAGASGF	14.6654	1.653	36.5859
renca_533	10	80287650	G	C	0/1	Dazap1	ENSMUSG00000069565	ENSMUST00000092305	383-391	406	387	G/A	missense_variant	14117	34.753	PPAGASGFG	88.5685	55.2562	91.1144
renca_534	10	80287650	G	C	0/1	Dazap1	ENSMUSG00000069565	ENSMUST00000092305	384-392	406	387	G/A	missense_variant	14117	34.753	PAGASGFGR	91.0154	70.7046	87.8101
renca_535	10	80287650	G	C	0/1	Dazap1	ENSMUSG00000069565	ENSMUST00000092305	385-393	406	387	G/A	missense_variant	14117	34.753	AGASGFGRG	13.1744	38.1726	37.2442
renca_536	10	80287650	G	C	0/1	Dazap1	ENSMUSG00000069565	ENSMUST00000092305	386-394	406	387	G/A	missense_variant	14117	34.753	GASGFGRGQ	83.7848	76.2785	90.4457
renca_537	10	80287650	G	C	0/1	Dazap1	ENSMUSG00000069565	ENSMUST00000092305	387-395	406	387	G/A	missense_variant	14117	34.753	ASGFGRGQN	71.1813	78.4807	69.9982
renca_538	10	80330288	G	C	0/1	Reep6	ENSMUSG00000035504	ENSMUST00000040081	2019-12-20	124	20	E/Q	missense_variant	40	0.115682	LEQKNVATQ	89.1528	47.2884	70.1958
renca_539	10	80330288	G	C	0/1	Reep6	ENSMUSG00000035504	ENSMUST00000040081	13-21	124	20	E/Q	missense_variant	40	0.115682	EQKNVATQA	93.9608	45.7202	44.7286
renca_540	10	80330288	G	C	0/1	Reep6	ENSMUSG00000035504	ENSMUST00000040081	14-22	124	20	E/Q	missense_variant	40	0.115682	QKNVATQAL	49.3581	10.2305	21.1839
renca_541	10	80330288	G	C	0/1	Reep6	ENSMUSG00000035504	ENSMUST00000040081	15-23	124	20	E/Q	missense_variant	40	0.115682	KNVATQALG	27.5629	53.6196	32.1012
renca_542	10	80330288	G	C	0/1	Reep6	ENSMUSG00000035504	ENSMUST00000040081	16-24	124	20	E/Q	missense_variant	40	0.115682	NVATQALGA	68.729	52.0357	44.8038
renca_543	10	80330288	G	C	0/1	Reep6	ENSMUSG00000035504	ENSMUST00000040081	17-25	124	20	E/Q	missense_variant	40	0.115682	VATQALGAL	6.0345	3.0329	5.672
renca_544	10	80330288	G	C	0/1	Reep6	ENSMUSG00000035504	ENSMUST00000040081	18-26	124	20	E/Q	missense_variant	40	0.115682	ATQALGALE	50.0092	35.1288	47.3228
renca_545	10	80330288	G	C	0/1	Reep6	ENSMUSG00000035504	ENSMUST00000040081	19-27	124	20	E/Q	missense_variant	40	0.115682	TQALGALEA	50.2427	28.988	18.1656
renca_546	10	80330288	G	C	0/1	Reep6	ENSMUSG00000035504	ENSMUST00000040081	20-28	124	20	E/Q	missense_variant	40	0.115682	QALGALEAR	62.4643	40.5773	42.0135
renca_547	10	80330288	G	C	0/1	Reep6	ENSMUSG00000035504	ENSMUST00000105357	85-93	572	93	R/P	missense_variant	40	0.115682	SGTEERGHP	54.6949	84.589	63.9234
renca_548	10	80330288	G	C	0/1	Reep6	ENSMUSG00000035504	ENSMUST00000105357	86-94	572	93	R/P	missense_variant	40	0.115682	GTEERGHPS	75.7214	63.5744	71.2966
renca_549	10	80330288	G	C	0/1	Reep6	ENSMUSG00000035504	ENSMUST00000105357	87-95	572	93	R/P	missense_variant	40	0.115682	TEERGHPSA	78.9144	39.3915	66.4147
renca_550	10	80330288	G	C	0/1	Reep6	ENSMUSG00000035504	ENSMUST00000105357	88-96	572	93	R/P	missense_variant	40	0.115682	EERGHPSAR	96.4996	56.5438	92.6283
renca_551	10	80330288	G	C	0/1	Reep6	ENSMUSG00000035504	ENSMUST00000105357	89-97	572	93	R/P	missense_variant	40	0.115682	ERGHPSARG	95.8633	91.6402	95.222
renca_552	10	80330288	G	C	0/1	Reep6	ENSMUSG00000035504	ENSMUST00000105357	90-98	572	93	R/P	missense_variant	40	0.115682	RGHPSARGA	23.0419	24.1119	29.3368
renca_553	10	80330288	G	C	0/1	Reep6	ENSMUSG00000035504	ENSMUST00000105357	91-99	572	93	R/P	missense_variant	40	0.115682	GHPSARGAR	54.577	54.7323	24.8221
renca_554	10	80330288	G	C	0/1	Reep6	ENSMUSG00000035504	ENSMUST00000105357	92-100	572	93	R/P	missense_variant	40	0.115682	HPSARGARS	76.5842	16.1833	75.4628
renca_555	10	80330288	G	C	0/1	Reep6	ENSMUSG00000035504	ENSMUST00000105357	93-101	572	93	R/P	missense_variant	40	0.115682	PSARGARSK	61.9226	89.0852	71.5342
renca_556	10	80381578	G	C	0/1	Mex3d	ENSMUSG00000048696	ENSMUST00000105350	594-602	718	602	P/A	missense_variant	5803	12.8773	VGAVPWRPA	5.9681	3.664	16.3755
renca_557	10	80381578	G	C	0/1	Mex3d	ENSMUSG00000048696	ENSMUST00000105350	595-603	718	602	P/A	missense_variant	5803	12.8773	GAVPWRPAQ	80.3185	41.9961	69.4085
renca_558	10	80381578	G	C	0/1	Mex3d	ENSMUSG00000048696	ENSMUST00000105350	596-604	718	602	P/A	missense_variant	5803	12.8773	AVPWRPAQS	23.6393	46.9106	57.7314
renca_559	10	80381578	G	C	0/1	Mex3d	ENSMUSG00000048696	ENSMUST00000105350	597-605	718	602	P/A	missense_variant	5803	12.8773	VPWRPAQSA	47.3069	0.9824	38.5595
renca_560	10	80381578	G	C	0/1	Mex3d	ENSMUSG00000048696	ENSMUST00000105350	598-606	718	602	P/A	missense_variant	5803	12.8773	PWRPAQSAL	40.0143	19.8885	5.7246
renca_561	10	80381578	G	C	0/1	Mex3d	ENSMUSG00000048696	ENSMUST00000105350	599-607	718	602	P/A	missense_variant	5803	12.8773	WRPAQSALP	47.0812	79.0718	53.6229
renca_562	10	80381578	G	C	0/1	Mex3d	ENSMUSG00000048696	ENSMUST00000105350	600-608	718	602	P/A	missense_variant	5803	12.8773	RPAQSALPP	47.0238	7.0359	37.1606
renca_563	10	80381578	G	C	0/1	Mex3d	ENSMUSG00000048696	ENSMUST00000105350	601-609	718	602	P/A	missense_variant	5803	12.8773	PAQSALPPF	7.4489	4.3992	17.0529
renca_564	10	80381578	G	C	0/1	Mex3d	ENSMUSG00000048696	ENSMUST00000105350	602-610	718	602	P/A	missense_variant	5803	12.8773	AQSALPPFS	67.0246	46.4282	25.1973
renca_565	10	80381691	G	C	0/1	Mex3d	ENSMUSG00000048696	ENSMUST00000105350	556-564	718	564	A/G	missense_variant	5803	12.8773	RRSSGGGAG	83.9165	75.4247	57.0145
renca_566	10	80381691	G	C	0/1	Mex3d	ENSMUSG00000048696	ENSMUST00000105350	557-565	718	564	A/G	missense_variant	5803	12.8773	RSSGGGAGT	47.8178	61.9628	47.2558
renca_567	10	80381691	G	C	0/1	Mex3d	ENSMUSG00000048696	ENSMUST00000105350	558-566	718	564	A/G	missense_variant	5803	12.8773	SSGGGAGTT	47.9723	62.5176	39.5801
renca_568	10	80381691	G	C	0/1	Mex3d	ENSMUSG00000048696	ENSMUST00000105350	559-567	718	564	A/G	missense_variant	5803	12.8773	SGGGAGTTP	31.7333	55.6094	36.2904
renca_569	10	80381691	G	C	0/1	Mex3d	ENSMUSG00000048696	ENSMUST00000105350	560-568	718	564	A/G	missense_variant	5803	12.8773	GGGAGTTPR	45.8802	53.8344	44.7897
renca_570	10	80381691	G	C	0/1	Mex3d	ENSMUSG00000048696	ENSMUST00000105350	561-569	718	564	A/G	missense_variant	5803	12.8773	GGAGTTPRH	59.1164	81.7525	90.8085
renca_571	10	80381691	G	C	0/1	Mex3d	ENSMUSG00000048696	ENSMUST00000105350	562-570	718	564	A/G	missense_variant	5803	12.8773	GAGTTPRHS	90.9798	85.4971	71.7681
renca_572	10	80381691	G	C	0/1	Mex3d	ENSMUSG00000048696	ENSMUST00000105350	563-571	718	564	A/G	missense_variant	5803	12.8773	AGTTPRHSP	38.0908	51.5421	45.8194
renca_573	10	80381691	G	C	0/1	Mex3d	ENSMUSG00000048696	ENSMUST00000105350	564-572	718	564	A/G	missense_variant	5803	12.8773	GTTPRHSPT	50.5178	45.2082	37.5107
renca_574	10	80586555	G	A	0/1	Abhd17a	ENSMUSG00000003346	ENSMUST00000003436	90-98	310	98	R/C	missense_variant	4982	23.34	VTKSARANC	30.3117	20.9534	37.7493
renca_575	10	80586555	G	A	0/1	Abhd17a	ENSMUSG00000003346	ENSMUST00000003436	91-99	310	98	R/C	missense_variant	4982	23.34	TKSARANCI	30.5819	22.8804	19.5548
renca_576	10	80586555	G	A	0/1	Abhd17a	ENSMUSG00000003346	ENSMUST00000003436	92-100	310	98	R/C	missense_variant	4982	23.34	KSARANCIA	7.1512	32.4399	13.7117
renca_577	10	80586555	G	A	0/1	Abhd17a	ENSMUSG00000003346	ENSMUST00000003436	93-101	310	98	R/C	missense_variant	4982	23.34	SARANCIAC	18.9917	7.9601	12.8536
renca_578	10	80586555	G	A	0/1	Abhd17a	ENSMUSG00000003346	ENSMUST00000003436	94-102	310	98	R/C	missense_variant	4982	23.34	ARANCIACM	28.7114	9.8999	8.9945
renca_579	10	80586555	G	A	0/1	Abhd17a	ENSMUSG00000003346	ENSMUST00000003436	95-103	310	98	R/C	missense_variant	4982	23.34	RANCIACMY	19.1216	7.0061	31.5604
renca_580	10	80586555	G	A	0/1	Abhd17a	ENSMUSG00000003346	ENSMUST00000003436	96-104	310	98	R/C	missense_variant	4982	23.34	ANCIACMYV	10.1729	16.1621	6.4085
renca_581	10	80586555	G	A	0/1	Abhd17a	ENSMUSG00000003346	ENSMUST00000003436	97-105	310	98	R/C	missense_variant	4982	23.34	NCIACMYVR	77.6768	43.3566	75.7223
renca_582	10	80586555	G	A	0/1	Abhd17a	ENSMUSG00000003346	ENSMUST00000003436	98-106	310	98	R/C	missense_variant	4982	23.34	CIACMYVRC	31.5667	45.9783	52.5174
renca_583	10	80716559	C	G	0/1	Ap3d1	ENSMUSG00000020198	ENSMUST00000020420	584-592	1199	592	V/L	missense_variant	19264	15.6625	KLQAKGVPL	7.9366	2.5534	3.9586
renca_584	10	80716559	C	G	0/1	Ap3d1	ENSMUSG00000020198	ENSMUST00000020420	585-593	1199	592	V/L	missense_variant	19264	15.6625	LQAKGVPLA	49.2576	36.1312	17.1434
renca_585	10	80716559	C	G	0/1	Ap3d1	ENSMUSG00000020198	ENSMUST00000020420	586-594	1199	592	V/L	missense_variant	19264	15.6625	QAKGVPLAE	89.6024	49.168	85.8928
renca_586	10	80716559	C	G	0/1	Ap3d1	ENSMUSG00000020198	ENSMUST00000020420	587-595	1199	592	V/L	missense_variant	19264	15.6625	AKGVPLAEE	95.7168	91.5862	94.1116
renca_587	10	80716559	C	G	0/1	Ap3d1	ENSMUSG00000020198	ENSMUST00000020420	588-596	1199	592	V/L	missense_variant	19264	15.6625	KGVPLAEEV	3.63	10.4198	3.9191
renca_588	10	80716559	C	G	0/1	Ap3d1	ENSMUSG00000020198	ENSMUST00000020420	589-597	1199	592	V/L	missense_variant	19264	15.6625	GVPLAEEVS	56.4497	91.1824	77.3335
renca_589	10	80716559	C	G	0/1	Ap3d1	ENSMUSG00000020198	ENSMUST00000020420	590-598	1199	592	V/L	missense_variant	19264	15.6625	VPLAEEVSA	73.7878	3.9522	63.3384
renca_590	10	80716559	C	G	0/1	Ap3d1	ENSMUSG00000020198	ENSMUST00000020420	591-599	1199	592	V/L	missense_variant	19264	15.6625	PLAEEVSAL	36.0747	42.4044	24.9103
renca_591	10	80716559	C	G	0/1	Ap3d1	ENSMUSG00000020198	ENSMUST00000020420	592-600	1199	592	V/L	missense_variant	19264	15.6625	LAEEVSALF	3.83	2.5183	22.1911
renca_592	10	80930489	C	G	0/1	Gadd45b	ENSMUSG00000015312	ENSMUST00000015456	21-29	160	29	A/G	missense_variant	12153	55.4304	AAVEQLLVG	38.3661	48.0732	39.6269
renca_593	10	80930489	C	G	0/1	Gadd45b	ENSMUSG00000015312	ENSMUST00000015456	22-30	160	29	A/G	missense_variant	12153	55.4304	AVEQLLVGA	73.647	63.2725	64.7008
renca_594	10	80930489	C	G	0/1	Gadd45b	ENSMUSG00000015312	ENSMUST00000015456	23-31	160	29	A/G	missense_variant	12153	55.4304	VEQLLVGAQ	90.6829	51.7429	91.0144
renca_595	10	80930489	C	G	0/1	Gadd45b	ENSMUSG00000015312	ENSMUST00000015456	24-32	160	29	A/G	missense_variant	12153	55.4304	EQLLVGAQR	93.5719	42.3327	57.0886
renca_596	10	80930489	C	G	0/1	Gadd45b	ENSMUSG00000015312	ENSMUST00000015456	25-33	160	29	A/G	missense_variant	12153	55.4304	QLLVGAQRQ	95.3173	86.4787	82.2296
renca_597	10	80930489	C	G	0/1	Gadd45b	ENSMUSG00000015312	ENSMUST00000015456	26-34	160	29	A/G	missense_variant	12153	55.4304	LLVGAQRQD	95.6143	95.0741	84.5617
renca_598	10	80930489	C	G	0/1	Gadd45b	ENSMUSG00000015312	ENSMUST00000015456	27-35	160	29	A/G	missense_variant	12153	55.4304	LVGAQRQDR	94.2043	72.4915	92.6529
renca_599	10	80930489	C	G	0/1	Gadd45b	ENSMUSG00000015312	ENSMUST00000015456	28-36	160	29	A/G	missense_variant	12153	55.4304	VGAQRQDRL	0.4131	5.2566	14.36
renca_600	10	80930489	C	G	0/1	Gadd45b	ENSMUSG00000015312	ENSMUST00000015456	29-37	160	29	A/G	missense_variant	12153	55.4304	GAQRQDRLT	74.3235	79.2338	72.2681
renca_601	10	81144332	G	C	0/1	Zbtb7a	ENSMUSG00000035011	ENSMUST00000048128	112-120	569	120	S/T	missense_variant	7266	7.73507	RLLEIPAVT	64.5625	39.6473	22.4886
renca_602	10	81144332	G	C	0/1	Zbtb7a	ENSMUSG00000035011	ENSMUST00000048128	113-121	569	120	S/T	missense_variant	7266	7.73507	LLEIPAVTH	92.8147	84.6838	97.0673
renca_603	10	81144332	G	C	0/1	Zbtb7a	ENSMUSG00000035011	ENSMUST00000048128	114-122	569	120	S/T	missense_variant	7266	7.73507	LEIPAVTHV	60.3423	11.879	5.805
renca_604	10	81144332	G	C	0/1	Zbtb7a	ENSMUSG00000035011	ENSMUST00000048128	115-123	569	120	S/T	missense_variant	7266	7.73507	EIPAVTHVC	23.7781	50.198	53.7218
renca_605	10	81144332	G	C	0/1	Zbtb7a	ENSMUSG00000035011	ENSMUST00000048128	116-124	569	120	S/T	missense_variant	7266	7.73507	IPAVTHVCA	43.1695	1.2983	34.0845
renca_606	10	81144332	G	C	0/1	Zbtb7a	ENSMUSG00000035011	ENSMUST00000048128	117-125	569	120	S/T	missense_variant	7266	7.73507	PAVTHVCAD	79.9788	88.6926	75.9043
renca_607	10	81144332	G	C	0/1	Zbtb7a	ENSMUSG00000035011	ENSMUST00000048128	118-126	569	120	S/T	missense_variant	7266	7.73507	AVTHVCADL	28.7264	15.3655	16.2694
renca_608	10	81144332	G	C	0/1	Zbtb7a	ENSMUSG00000035011	ENSMUST00000048128	119-127	569	120	S/T	missense_variant	7266	7.73507	VTHVCADLL	1.595	3.671	6.8737
renca_609	10	81144332	G	C	0/1	Zbtb7a	ENSMUSG00000035011	ENSMUST00000048128	120-128	569	120	S/T	missense_variant	7266	7.73507	THVCADLLE	58.582	37.4951	26.384
renca_610	10	81155739	G	A	0/1	Pias4	ENSMUSG00000004934	ENSMUST00000005064	317-325	507	325	R/C	missense_variant	4144	8.12818	LICPLVKMC	77.3303	81.486	75.5229
renca_611	10	81155739	G	A	0/1	Pias4	ENSMUSG00000004934	ENSMUST00000005064	318-326	507	325	R/C	missense_variant	4144	8.12818	ICPLVKMCL	3.0909	16.3729	48.1807
renca_612	10	81155739	G	A	0/1	Pias4	ENSMUSG00000004934	ENSMUST00000005064	319-327	507	325	R/C	missense_variant	4144	8.12818	CPLVKMCLS	38.4599	4.1906	48.2459
renca_613	10	81155739	G	A	0/1	Pias4	ENSMUSG00000004934	ENSMUST00000005064	320-328	507	325	R/C	missense_variant	4144	8.12818	PLVKMCLSV	45.735	61.8153	16.9844
renca_614	10	81155739	G	A	0/1	Pias4	ENSMUSG00000004934	ENSMUST00000005064	321-329	507	325	R/C	missense_variant	4144	8.12818	LVKMCLSVP	67.4094	63.5744	53.9432
renca_615	10	81155739	G	A	0/1	Pias4	ENSMUSG00000004934	ENSMUST00000005064	322-330	507	325	R/C	missense_variant	4144	8.12818	VKMCLSVPC	46.7713	18.2643	23.2519
renca_616	10	81155739	G	A	0/1	Pias4	ENSMUSG00000004934	ENSMUST00000005064	323-331	507	325	R/C	missense_variant	4144	8.12818	KMCLSVPCR	53.2293	54.6096	40.6905
renca_617	10	81155739	G	A	0/1	Pias4	ENSMUSG00000004934	ENSMUST00000005064	324-332	507	325	R/C	missense_variant	4144	8.12818	MCLSVPCRA	66.0155	29.4715	38.0076
renca_618	10	81155739	G	A	0/1	Pias4	ENSMUSG00000004934	ENSMUST00000005064	325-333	507	325	R/C	missense_variant	4144	8.12818	CLSVPCRAE	68.3182	72.326	69.4268
renca_619	10	81271821	A	G	0/1	Apba3	ENSMUSG00000004931	ENSMUST00000057798	380-388	571	388	N/D	missense_variant	8164	20.4736	LDHFCNSQD	82.3755	73.8964	86.7289
renca_620	10	81271821	A	G	0/1	Apba3	ENSMUSG00000004931	ENSMUST00000057798	381-389	571	388	N/D	missense_variant	8164	20.4736	DHFCNSQDC	54.1493	27.4889	19.1503
renca_621	10	81271821	A	G	0/1	Apba3	ENSMUSG00000004931	ENSMUST00000057798	382-390	571	388	N/D	missense_variant	8164	20.4736	HFCNSQDCR	85.0104	65.8784	48.1041
renca_622	10	81271821	A	G	0/1	Apba3	ENSMUSG00000004931	ENSMUST00000057798	383-391	571	388	N/D	missense_variant	8164	20.4736	FCNSQDCRE	94.7031	93.2588	95.0325
renca_623	10	81271821	A	G	0/1	Apba3	ENSMUSG00000004931	ENSMUST00000057798	384-392	571	388	N/D	missense_variant	8164	20.4736	CNSQDCREV	26.8004	40.5737	16.3261
renca_624	10	81271821	A	G	0/1	Apba3	ENSMUSG00000004931	ENSMUST00000057798	385-393	571	388	N/D	missense_variant	8164	20.4736	NSQDCREVC	41.1028	37.4118	45.009
renca_625	10	81271821	A	G	0/1	Apba3	ENSMUSG00000004931	ENSMUST00000057798	386-394	571	388	N/D	missense_variant	8164	20.4736	SQDCREVCI	9.7916	16.4493	11.4072
renca_626	10	81271821	A	G	0/1	Apba3	ENSMUSG00000004931	ENSMUST00000057798	387-395	571	388	N/D	missense_variant	8164	20.4736	QDCREVCIQ	91.6004	95.3491	96.2707
renca_627	10	81271821	A	G	0/1	Apba3	ENSMUSG00000004931	ENSMUST00000057798	388-396	571	388	N/D	missense_variant	8164	20.4736	DCREVCIQK	95.4508	63.8132	92.9265
renca_628	10	82638761	A	C	0/1	Tdg	ENSMUSG00000034674	ENSMUST00000092266	2019-01-09	397	4	E/D	missense_variant	8450	11.3959	MMADVPNMA	47.8158	24.7332	11.7747
renca_629	10	82638761	A	C	0/1	Tdg	ENSMUSG00000034674	ENSMUST00000092266	2019-02-10	397	4	E/D	missense_variant	8450	11.3959	MADVPNMAV	10.9485	3.9559	17.8483
renca_630	10	82638761	A	C	0/1	Tdg	ENSMUSG00000034674	ENSMUST00000092266	2019-03-11	397	4	E/D	missense_variant	8450	11.3959	ADVPNMAVT	70.5769	51.0151	42.3482
renca_631	10	82638761	A	C	0/1	Tdg	ENSMUSG00000034674	ENSMUST00000092266	2019-04-12	397	4	E/D	missense_variant	8450	11.3959	DVPNMAVTT	47.404	50.6302	50.9329
renca_632	10	82638761	A	C	0/1	Tdg	ENSMUSG00000034674	ENSMUST00000151390	20-28	421	28	E/D	missense_variant	8450	11.3959	FPFQQMMAD	60.1339	8.3107	55.8137
renca_633	10	82638761	A	C	0/1	Tdg	ENSMUSG00000034674	ENSMUST00000151390	21-29	421	28	E/D	missense_variant	8450	11.3959	PFQQMMADV	66.1287	44.6722	7.232
renca_634	10	82638761	A	C	0/1	Tdg	ENSMUSG00000034674	ENSMUST00000151390	22-30	421	28	E/D	missense_variant	8450	11.3959	FQQMMADVP	48.8518	42.1155	8.4297
renca_635	10	82638761	A	C	0/1	Tdg	ENSMUSG00000034674	ENSMUST00000151390	23-31	421	28	E/D	missense_variant	8450	11.3959	QQMMADVPN	72.84	34.9358	24.6494
renca_636	10	82638761	A	C	0/1	Tdg	ENSMUSG00000034674	ENSMUST00000151390	24-32	421	28	E/D	missense_variant	8450	11.3959	QMMADVPNM	21.9005	2.8986	4.1438
renca_637	10	85907470	G	A	0/1	Prdm4	ENSMUSG00000035529	ENSMUST00000037646	299-307	796	307	S/F	missense_variant	6230	9.18843	LSTSHNLAF	1.52	2.7533	16.6102
renca_638	10	85907470	G	A	0/1	Prdm4	ENSMUSG00000035529	ENSMUST00000037646	300-308	796	307	S/F	missense_variant	6230	9.18843	STSHNLAFL	0.8	4.646	2.1396
renca_639	10	85907470	G	A	0/1	Prdm4	ENSMUSG00000035529	ENSMUST00000037646	301-309	796	307	S/F	missense_variant	6230	9.18843	TSHNLAFLE	17.6981	18.2415	47.5067
renca_640	10	85907470	G	A	0/1	Prdm4	ENSMUSG00000035529	ENSMUST00000037646	302-310	796	307	S/F	missense_variant	6230	9.18843	SHNLAFLES	31.7678	13.491	5.4812
renca_641	10	85907470	G	A	0/1	Prdm4	ENSMUSG00000035529	ENSMUST00000037646	303-311	796	307	S/F	missense_variant	6230	9.18843	HNLAFLESV	6.7383	5.7942	3.3122
renca_642	10	85907470	G	A	0/1	Prdm4	ENSMUSG00000035529	ENSMUST00000037646	304-312	796	307	S/F	missense_variant	6230	9.18843	NLAFLESVS	80.388	73.472	40.8563
renca_643	10	85907470	G	A	0/1	Prdm4	ENSMUSG00000035529	ENSMUST00000037646	305-313	796	307	S/F	missense_variant	6230	9.18843	LAFLESVSL	3.2072	1.1841	9.8646
renca_644	10	85907470	G	A	0/1	Prdm4	ENSMUSG00000035529	ENSMUST00000037646	306-314	796	307	S/F	missense_variant	6230	9.18843	AFLESVSLH	84.9158	55.8094	31.8514
renca_645	10	85907470	G	A	0/1	Prdm4	ENSMUSG00000035529	ENSMUST00000037646	307-315	796	307	S/F	missense_variant	6230	9.18843	FLESVSLHE	84.7291	67.7901	69.6385
renca_646	10	91119640	G	A	0/1	Slc25a3	ENSMUSG00000061904	ENSMUST00000076694	104-112	357	112	R/C	missense_variant	48635	63.5103	ITLKEDGVC	49.1223	75.5166	70.5589
renca_647	10	91119640	G	A	0/1	Slc25a3	ENSMUSG00000061904	ENSMUST00000076694	105-113	357	112	R/C	missense_variant	48635	63.5103	TLKEDGVCG	94.3735	78.6208	87.6729
renca_648	10	91119640	G	A	0/1	Slc25a3	ENSMUSG00000061904	ENSMUST00000076694	106-114	357	112	R/C	missense_variant	48635	63.5103	LKEDGVCGL	61.2143	43.5656	67.6031
renca_649	10	91119640	G	A	0/1	Slc25a3	ENSMUSG00000061904	ENSMUST00000076694	107-115	357	112	R/C	missense_variant	48635	63.5103	KEDGVCGLA	61.7768	46.0682	57.0236
renca_650	10	91119640	G	A	0/1	Slc25a3	ENSMUSG00000061904	ENSMUST00000076694	108-116	357	112	R/C	missense_variant	48635	63.5103	EDGVCGLAK	88.5166	61.1868	92.9127
renca_651	10	91119640	G	A	0/1	Slc25a3	ENSMUSG00000061904	ENSMUST00000076694	109-117	357	112	R/C	missense_variant	48635	63.5103	DGVCGLAKG	48.0397	61.4431	66.4421
renca_652	10	91119640	G	A	0/1	Slc25a3	ENSMUSG00000061904	ENSMUST00000076694	110-118	357	112	R/C	missense_variant	48635	63.5103	GVCGLAKGW	60.372	74.444	64.5955
renca_653	10	91119640	G	A	0/1	Slc25a3	ENSMUSG00000061904	ENSMUST00000076694	111-119	357	112	R/C	missense_variant	48635	63.5103	VCGLAKGWA	83.5944	70.1443	80.7192
renca_654	10	91119640	G	A	0/1	Slc25a3	ENSMUSG00000061904	ENSMUST00000076694	112-120	357	112	R/C	missense_variant	48635	63.5103	CGLAKGWAP	14.8293	18.8456	23.1446
renca_655	10	93578857	G	A	0/1	Ccdc38	ENSMUSG00000036168	ENSMUST00000132214	368-376	524	376	R/K	missense_variant	6351	10.692	KYIIYQLKK	39.9162	32.8913	11.5943
renca_656	10	93578857	G	A	0/1	Ccdc38	ENSMUSG00000036168	ENSMUST00000132214	369-377	524	376	R/K	missense_variant	6351	10.692	YIIYQLKKL	24.7041	14.6698	16.1855
renca_657	10	93578857	G	A	0/1	Ccdc38	ENSMUSG00000036168	ENSMUST00000132214	370-378	524	376	R/K	missense_variant	6351	10.692	IIYQLKKLQ	82.5512	51.821	84.8064
renca_658	10	93578857	G	A	0/1	Ccdc38	ENSMUSG00000036168	ENSMUST00000132214	371-379	524	376	R/K	missense_variant	6351	10.692	IYQLKKLQN	80.6735	49.96	28.7014
renca_659	10	93578857	G	A	0/1	Ccdc38	ENSMUSG00000036168	ENSMUST00000132214	372-380	524	376	R/K	missense_variant	6351	10.692	YQLKKLQNQ	73.4512	55.7687	31.4819
renca_660	10	93578857	G	A	0/1	Ccdc38	ENSMUSG00000036168	ENSMUST00000132214	373-381	524	376	R/K	missense_variant	6351	10.692	QLKKLQNQV	59.0026	30.4364	24.1758
renca_661	10	93578857	G	A	0/1	Ccdc38	ENSMUSG00000036168	ENSMUST00000132214	374-382	524	376	R/K	missense_variant	6351	10.692	LKKLQNQVK	95.1155	87.8989	92.2595
renca_662	10	93578857	G	A	0/1	Ccdc38	ENSMUSG00000036168	ENSMUST00000132214	375-383	524	376	R/K	missense_variant	6351	10.692	KKLQNQVKH	95.8804	91.0851	90.7224
renca_663	10	93578857	G	A	0/1	Ccdc38	ENSMUSG00000036168	ENSMUST00000132214	376-384	524	376	R/K	missense_variant	6351	10.692	KLQNQVKHR	86.7946	75.9238	77.897
renca_664	10	111506783	G	C	0/1	Phlda1	ENSMUSG00000020205	ENSMUST00000164773	119-127	405	127	A/P	missense_variant	242	0.795417	LLLLPPAGP	90.3741	88.3041	66.3089
renca_665	10	111506783	G	C	0/1	Phlda1	ENSMUSG00000020205	ENSMUST00000164773	120-128	405	127	A/P	missense_variant	242	0.795417	LLLPPAGPS	82.0132	56.9	37.8236
renca_666	10	111506783	G	C	0/1	Phlda1	ENSMUSG00000020205	ENSMUST00000164773	121-129	405	127	A/P	missense_variant	242	0.795417	LLPPAGPSG	27.7743	39.5256	45.3758
renca_667	10	111506783	G	C	0/1	Phlda1	ENSMUSG00000020205	ENSMUST00000164773	122-130	405	127	A/P	missense_variant	242	0.795417	LPPAGPSGS	68.108	28.8061	79.2157
renca_668	10	111506783	G	C	0/1	Phlda1	ENSMUSG00000020205	ENSMUST00000164773	123-131	405	127	A/P	missense_variant	242	0.795417	PPAGPSGSL	55.1085	6.9186	60.2625
renca_669	10	111506783	G	C	0/1	Phlda1	ENSMUSG00000020205	ENSMUST00000164773	124-132	405	127	A/P	missense_variant	242	0.795417	PAGPSGSLK	75.4738	69.6582	73.8916
renca_670	10	111506783	G	C	0/1	Phlda1	ENSMUSG00000020205	ENSMUST00000164773	125-133	405	127	A/P	missense_variant	242	0.795417	AGPSGSLKA	3.4469	32.4757	34.1587
renca_671	10	111506783	G	C	0/1	Phlda1	ENSMUSG00000020205	ENSMUST00000164773	126-134	405	127	A/P	missense_variant	242	0.795417	GPSGSLKAE	95.3499	44.1992	95.066
renca_672	10	111506783	G	C	0/1	Phlda1	ENSMUSG00000020205	ENSMUST00000164773	127-135	405	127	A/P	missense_variant	242	0.795417	PSGSLKAER	84.9414	83.6495	85.0311
renca_673	10	121557295	A	C	0/1	Tbk1	ENSMUSG00000020115	ENSMUST00000020316	442-450	729	450	V/G	missense_variant	9310	17.2568	GVRWLVELG	58.0026	59.1688	61.4845
renca_674	10	121557295	A	C	0/1	Tbk1	ENSMUSG00000020115	ENSMUST00000020316	443-451	729	450	V/G	missense_variant	9310	17.2568	VRWLVELGK	72.0158	40.6475	67.1723
renca_675	10	121557295	A	C	0/1	Tbk1	ENSMUSG00000020115	ENSMUST00000020316	444-452	729	450	V/G	missense_variant	9310	17.2568	RWLVELGKD	84.5351	95.036	53.1231
renca_676	10	121557295	A	C	0/1	Tbk1	ENSMUSG00000020115	ENSMUST00000020316	445-453	729	450	V/G	missense_variant	9310	17.2568	WLVELGKDD	96.9748	96.3066	86.1617
renca_677	10	121557295	A	C	0/1	Tbk1	ENSMUSG00000020115	ENSMUST00000020316	446-454	729	450	V/G	missense_variant	9310	17.2568	LVELGKDDY	86.3382	68.8474	95.0694
renca_678	10	121557295	A	C	0/1	Tbk1	ENSMUSG00000020115	ENSMUST00000020316	447-455	729	450	V/G	missense_variant	9310	17.2568	VELGKDDYN	94.8842	73.1706	85.3549
renca_679	10	121557295	A	C	0/1	Tbk1	ENSMUSG00000020115	ENSMUST00000020316	448-456	729	450	V/G	missense_variant	9310	17.2568	ELGKDDYNE	96.6379	95.438	97.106
renca_680	10	121557295	A	C	0/1	Tbk1	ENSMUSG00000020115	ENSMUST00000020316	449-457	729	450	V/G	missense_variant	9310	17.2568	LGKDDYNET	46.3951	44.2967	74.8593
renca_681	10	121557295	A	C	0/1	Tbk1	ENSMUSG00000020115	ENSMUST00000020316	450-458	729	450	V/G	missense_variant	9310	17.2568	GKDDYNETV	63.3036	63.8272	61.9659
renca_682	10	121840112	T	G	0/1	Srgap1	ENSMUSG00000020121	ENSMUST00000020322	434-442	1062	442	K/N	missense_variant&splice_region_variant	396	0.314281	ETEQFYFMN	48.7015	56.4281	95.0057
renca_683	10	121840112	T	G	0/1	Srgap1	ENSMUSG00000020121	ENSMUST00000020322	435-443	1062	442	K/N	missense_variant&splice_region_variant	396	0.314281	TEQFYFMNL	6.9144	0.7115	25.6962
renca_684	10	121840112	T	G	0/1	Srgap1	ENSMUSG00000020121	ENSMUST00000020322	436-444	1062	442	K/N	missense_variant&splice_region_variant	396	0.314281	EQFYFMNLR	39.9771	25.6843	44.5441
renca_685	10	121840112	T	G	0/1	Srgap1	ENSMUSG00000020121	ENSMUST00000020322	437-445	1062	442	K/N	missense_variant&splice_region_variant	396	0.314281	QFYFMNLRE	64.881	37.469	42.7036
renca_686	10	121840112	T	G	0/1	Srgap1	ENSMUSG00000020121	ENSMUST00000020322	438-446	1062	442	K/N	missense_variant&splice_region_variant	396	0.314281	FYFMNLREF	3.2374	1.2259	0.1782
renca_687	10	121840112	T	G	0/1	Srgap1	ENSMUSG00000020121	ENSMUST00000020322	439-447	1062	442	K/N	missense_variant&splice_region_variant	396	0.314281	YFMNLREFL	3.3871	0.4337	0.0297
renca_688	10	121840112	T	G	0/1	Srgap1	ENSMUSG00000020121	ENSMUST00000020322	440-448	1062	442	K/N	missense_variant&splice_region_variant	396	0.314281	FMNLREFLE	35.2104	27.5217	53.8736
renca_689	10	121840112	T	G	0/1	Srgap1	ENSMUSG00000020121	ENSMUST00000020322	441-449	1062	442	K/N	missense_variant&splice_region_variant	396	0.314281	MNLREFLEG	12.5888	23.6451	39.5234
renca_690	10	121840112	T	G	0/1	Srgap1	ENSMUSG00000020121	ENSMUST00000020322	442-450	1062	442	K/N	missense_variant&splice_region_variant	396	0.314281	NLREFLEGS	74.1174	49.944	57.922
renca_691	10	126887584	CC	AA	0/1	Atp23	ENSMUSG00000025436	ENSMUST00000168520	208-216	246	216	R/L	missense_variant	1626	2.79849	VFQTCFNDL	12.3288	2.9869	1.2841
renca_692	10	126887584	CC	AA	0/1	Atp23	ENSMUSG00000025436	ENSMUST00000168520	209-217	246	216	R/L	missense_variant	1626	2.79849	FQTCFNDLE	37.6477	50.0028	29.8267
renca_693	10	126887584	CC	AA	0/1	Atp23	ENSMUSG00000025436	ENSMUST00000168520	210-218	246	216	R/L	missense_variant	1626	2.79849	QTCFNDLEP	65.2264	81.4499	73.6825
renca_694	10	126887584	CC	AA	0/1	Atp23	ENSMUSG00000025436	ENSMUST00000168520	211-219	246	216	R/L	missense_variant	1626	2.79849	TCFNDLEPF	11.074	8.6651	29.5167
renca_695	10	126887584	CC	AA	0/1	Atp23	ENSMUSG00000025436	ENSMUST00000168520	212-220	246	216	R/L	missense_variant	1626	2.79849	CFNDLEPFG	72.3935	59.9719	31.2951
renca_696	10	126887584	CC	AA	0/1	Atp23	ENSMUSG00000025436	ENSMUST00000168520	213-221	246	216	R/L	missense_variant	1626	2.79849	FNDLEPFGR	49.0895	60.4705	86.33
renca_697	10	126887584	CC	AA	0/1	Atp23	ENSMUSG00000025436	ENSMUST00000168520	214-222	246	216	R/L	missense_variant	1626	2.79849	NDLEPFGRI	24.0518	9.8753	25.4533
renca_698	10	126887584	CC	AA	0/1	Atp23	ENSMUSG00000025436	ENSMUST00000168520	215-223	246	216	R/L	missense_variant	1626	2.79849	DLEPFGRIP	91.0808	78.6033	91.9398
renca_699	10	126887584	CC	AA	0/1	Atp23	ENSMUSG00000025436	ENSMUST00000168520	216-224	246	216	R/L	missense_variant	1626	2.79849	LEPFGRIPH	74.5604	48.5909	92.5177
renca_700	10	127096280	T	A	0/1	Os9	ENSMUSG00000040462	ENSMUST00000080975	599-607	617	607	E/D	missense_variant	18039	49.729	RVWGSPGGD	90.8699	78.9667	80.1328
renca_701	10	127096280	T	A	0/1	Os9	ENSMUSG00000040462	ENSMUST00000080975	600-608	617	607	E/D	missense_variant	18039	49.729	VWGSPGGDD	95.9593	96.1543	89.9945
renca_702	10	127096280	T	A	0/1	Os9	ENSMUSG00000040462	ENSMUST00000080975	601-609	617	607	E/D	missense_variant	18039	49.729	WGSPGGDDT	57.4312	63.3638	75.8094
renca_703	10	127096280	T	A	0/1	Os9	ENSMUSG00000040462	ENSMUST00000080975	602-610	617	607	E/D	missense_variant	18039	49.729	GSPGGDDTG	29.9239	95.5914	86.2971
renca_704	10	127096280	T	A	0/1	Os9	ENSMUSG00000040462	ENSMUST00000080975	603-611	617	607	E/D	missense_variant	18039	49.729	SPGGDDTGD	97.7819	95.019	98.1877
renca_705	10	127096280	T	A	0/1	Os9	ENSMUSG00000040462	ENSMUST00000080975	604-612	617	607	E/D	missense_variant	18039	49.729	PGGDDTGDL	54.2164	80.2891	94.3022
renca_706	10	127096280	T	A	0/1	Os9	ENSMUSG00000040462	ENSMUST00000080975	605-613	617	607	E/D	missense_variant	18039	49.729	GGDDTGDLD	68.7484	96.971	96.1305
renca_707	10	127096280	T	A	0/1	Os9	ENSMUSG00000040462	ENSMUST00000080975	606-614	617	607	E/D	missense_variant	18039	49.729	GDDTGDLDE	97.2295	97.7444	98.4217
renca_708	10	127096280	T	A	0/1	Os9	ENSMUSG00000040462	ENSMUST00000080975	607-615	617	607	E/D	missense_variant	18039	49.729	DDTGDLDEF	52.129	51.1015	91.4095
renca_709	10	127170947	G	C	0/1	B4galnt1	ENSMUSG00000006731	ENSMUST00000006914	383-391	533	391	G/A	missense_variant	7770	16.3037	GGAVREISA	26.8294	40.7932	47.7844
renca_710	10	127170947	G	C	0/1	B4galnt1	ENSMUSG00000006731	ENSMUST00000006914	384-392	533	391	G/A	missense_variant	7770	16.3037	GAVREISAY	52.4457	40.964	38.7873
renca_711	10	127170947	G	C	0/1	B4galnt1	ENSMUSG00000006731	ENSMUST00000006914	385-393	533	391	G/A	missense_variant	7770	16.3037	AVREISAYA	51.6389	13.3089	13.516
renca_712	10	127170947	G	C	0/1	B4galnt1	ENSMUSG00000006731	ENSMUST00000006914	386-394	533	391	G/A	missense_variant	7770	16.3037	VREISAYAT	79.3918	43.3135	57.6452
renca_713	10	127170947	G	C	0/1	B4galnt1	ENSMUSG00000006731	ENSMUST00000006914	387-395	533	391	G/A	missense_variant	7770	16.3037	REISAYATT	51.669	18.0485	18.9696
renca_714	10	127170947	G	C	0/1	B4galnt1	ENSMUSG00000006731	ENSMUST00000006914	388-396	533	391	G/A	missense_variant	7770	16.3037	EISAYATTY	54.7758	27.6114	78.5825
renca_715	10	127170947	G	C	0/1	B4galnt1	ENSMUSG00000006731	ENSMUST00000006914	389-397	533	391	G/A	missense_variant	7770	16.3037	ISAYATTYR	11.7457	19.3947	12.5126
renca_716	10	127170947	G	C	0/1	B4galnt1	ENSMUSG00000006731	ENSMUST00000006914	390-398	533	391	G/A	missense_variant	7770	16.3037	SAYATTYRQ	36.5602	12.4513	35.9371
renca_717	10	127170947	G	C	0/1	B4galnt1	ENSMUSG00000006731	ENSMUST00000006914	391-399	533	391	G/A	missense_variant	7770	16.3037	AYATTYRQL	10.7394	3.653	0.0216
renca_718	10	127192816	C	G	0/1	Dtx3	ENSMUSG00000040415	ENSMUST00000038217	173-181	347	181	R/S	missense_variant	2734	7.70399	NAKTLEKCS	92.7257	66.1645	81.0171
renca_719	10	127192816	C	G	0/1	Dtx3	ENSMUSG00000040415	ENSMUST00000038217	174-182	347	181	R/S	missense_variant	2734	7.70399	AKTLEKCSH	96.7201	96.5118	96.5032
renca_720	10	127192816	C	G	0/1	Dtx3	ENSMUSG00000040415	ENSMUST00000038217	175-183	347	181	R/S	missense_variant	2734	7.70399	KTLEKCSHS	35.3142	37.9036	15.1476
renca_721	10	127192816	C	G	0/1	Dtx3	ENSMUSG00000040415	ENSMUST00000038217	176-184	347	181	R/S	missense_variant	2734	7.70399	TLEKCSHSF	13.1387	6.6668	24.5456
renca_722	10	127192816	C	G	0/1	Dtx3	ENSMUSG00000040415	ENSMUST00000038217	177-185	347	181	R/S	missense_variant	2734	7.70399	LEKCSHSFC	62.9792	22.9453	49.0328
renca_723	10	127192816	C	G	0/1	Dtx3	ENSMUSG00000040415	ENSMUST00000038217	178-186	347	181	R/S	missense_variant	2734	7.70399	EKCSHSFCE	95.2091	75.289	93.3385
renca_724	10	127192816	C	G	0/1	Dtx3	ENSMUSG00000040415	ENSMUST00000038217	179-187	347	181	R/S	missense_variant	2734	7.70399	KCSHSFCEG	45.343	66.1566	61.7803
renca_725	10	127192816	C	G	0/1	Dtx3	ENSMUSG00000040415	ENSMUST00000038217	180-188	347	181	R/S	missense_variant	2734	7.70399	CSHSFCEGC	6.9479	29.5329	26.2512
renca_726	10	127192816	C	G	0/1	Dtx3	ENSMUSG00000040415	ENSMUST00000038217	181-189	347	181	R/S	missense_variant	2734	7.70399	SHSFCEGCI	11.0884	12.2181	1.3284
renca_727	10	127559151	C	T	0/1	Lrp1	ENSMUSG00000040249	ENSMUST00000049149	2494-2502	4545	2502	V/I	missense_variant	4026	1.64692	CLLTHQGHI	16.4651	15.8094	2.7302
renca_728	10	127559151	C	T	0/1	Lrp1	ENSMUSG00000040249	ENSMUST00000049149	2495-2503	4545	2502	V/I	missense_variant	4026	1.64692	LLTHQGHIN	94.5873	92.1918	91.4417
renca_729	10	127559151	C	T	0/1	Lrp1	ENSMUSG00000040249	ENSMUST00000049149	2496-2504	4545	2502	V/I	missense_variant	4026	1.64692	LTHQGHINC	33.0276	25.172	48.9373
renca_730	10	127559151	C	T	0/1	Lrp1	ENSMUSG00000040249	ENSMUST00000049149	2497-2505	4545	2502	V/I	missense_variant	4026	1.64692	THQGHINCS	57.9709	35.5122	14.2071
renca_731	10	127559151	C	T	0/1	Lrp1	ENSMUSG00000040249	ENSMUST00000049149	2498-2506	4545	2502	V/I	missense_variant	4026	1.64692	HQGHINCSC	64.997	56.4813	44.0693
renca_732	10	127559151	C	T	0/1	Lrp1	ENSMUSG00000040249	ENSMUST00000049149	2499-2507	4545	2502	V/I	missense_variant	4026	1.64692	QGHINCSCR	29.1998	36.2701	40.5065
renca_733	10	127559151	C	T	0/1	Lrp1	ENSMUSG00000040249	ENSMUST00000049149	2500-2508	4545	2502	V/I	missense_variant	4026	1.64692	GHINCSCRG	58.2804	67.9134	12.1524
renca_734	10	127559151	C	T	0/1	Lrp1	ENSMUSG00000040249	ENSMUST00000049149	2501-2509	4545	2502	V/I	missense_variant	4026	1.64692	HINCSCRGG	71.8098	69.8609	55.5157
renca_735	10	127559151	C	T	0/1	Lrp1	ENSMUSG00000040249	ENSMUST00000049149	2502-2510	4545	2502	V/I	missense_variant	4026	1.64692	INCSCRGGR	62.4375	49.2187	53.9627
renca_736	10	128487994	G	C	0/1	Smarcc2	ENSMUSG00000025369	ENSMUST00000026433	1059-1067	1099	1067	G/A	missense_variant	11822	15.4323	SMMPGAVPA	23.4546	5.3765	1.172
renca_737	10	128487994	G	C	0/1	Smarcc2	ENSMUSG00000025369	ENSMUST00000026433	1060-1068	1099	1067	G/A	missense_variant	11822	15.4323	MMPGAVPAS	22.0536	31.5076	17.6748
renca_738	10	128487994	G	C	0/1	Smarcc2	ENSMUSG00000025369	ENSMUST00000026433	1061-1069	1099	1067	G/A	missense_variant	11822	15.4323	MPGAVPASG	66.4845	4.2923	59.0487
renca_739	10	128487994	G	C	0/1	Smarcc2	ENSMUSG00000025369	ENSMUST00000026433	1062-1070	1099	1067	G/A	missense_variant	11822	15.4323	PGAVPASGH	74.7699	92.7758	95.3014
renca_740	10	128487994	G	C	0/1	Smarcc2	ENSMUSG00000025369	ENSMUST00000026433	1063-1071	1099	1067	G/A	missense_variant	11822	15.4323	GAVPASGHP	76.6231	80.7453	39.7646
renca_741	10	128487994	G	C	0/1	Smarcc2	ENSMUSG00000025369	ENSMUST00000026433	1064-1072	1099	1067	G/A	missense_variant	11822	15.4323	AVPASGHPG	26.2087	33.8089	27.2989
renca_742	10	128487994	G	C	0/1	Smarcc2	ENSMUSG00000025369	ENSMUST00000026433	1065-1073	1099	1067	G/A	missense_variant	11822	15.4323	VPASGHPGV	29.7201	0.3915	20.3317
renca_743	10	128487994	G	C	0/1	Smarcc2	ENSMUSG00000025369	ENSMUST00000026433	1066-1074	1099	1067	G/A	missense_variant	11822	15.4323	PASGHPGVA	83.0271	73.6036	80.1157
renca_744	10	128487994	G	C	0/1	Smarcc2	ENSMUSG00000025369	ENSMUST00000026433	1067-1075	1099	1067	G/A	missense_variant	11822	15.4323	ASGHPGVAD	71.1161	85.0585	86.0501
renca_745	10	128487994	G	C	0/1	Smarcc2	ENSMUSG00000025369	ENSMUST00000105235	1067-1075	1213	1067	G/A	missense_variant	11822	15.4323	ASGHPGVAG	49.9498	61.8855	65.3615
renca_746	11	3680194	G	T	0/1	Morc2a	ENSMUSG00000034543	ENSMUST00000093389	455-463	1030	463	K/N	missense_variant	6746	8.13099	AIAQRGIIN	86.7739	80.5827	86.1544
renca_747	11	3680194	G	T	0/1	Morc2a	ENSMUSG00000034543	ENSMUST00000093389	456-464	1030	463	K/N	missense_variant	6746	8.13099	IAQRGIINF	2.1987	1.107	16.3111
renca_748	11	3680194	G	T	0/1	Morc2a	ENSMUSG00000034543	ENSMUST00000093389	457-465	1030	463	K/N	missense_variant	6746	8.13099	AQRGIINFW	15.3759	9.0401	14.8145
renca_749	11	3680194	G	T	0/1	Morc2a	ENSMUSG00000034543	ENSMUST00000093389	458-466	1030	463	K/N	missense_variant	6746	8.13099	QRGIINFWD	91.2619	68.5294	95.0368
renca_750	11	3680194	G	T	0/1	Morc2a	ENSMUSG00000034543	ENSMUST00000093389	459-467	1030	463	K/N	missense_variant	6746	8.13099	RGIINFWDE	7.6278	21.9442	46.9424
renca_751	11	3680194	G	T	0/1	Morc2a	ENSMUSG00000034543	ENSMUST00000093389	460-468	1030	463	K/N	missense_variant	6746	8.13099	GIINFWDEF	8.4113	3.5995	14.9997
renca_752	11	3680194	G	T	0/1	Morc2a	ENSMUSG00000034543	ENSMUST00000093389	461-469	1030	463	K/N	missense_variant	6746	8.13099	IINFWDEFG	52.1059	57.2969	77.9822
renca_753	11	3680194	G	T	0/1	Morc2a	ENSMUSG00000034543	ENSMUST00000093389	462-470	1030	463	K/N	missense_variant	6746	8.13099	INFWDEFGY	17.3436	12.7282	68.2494
renca_754	11	3680194	G	T	0/1	Morc2a	ENSMUSG00000034543	ENSMUST00000093389	463-471	1030	463	K/N	missense_variant	6746	8.13099	NFWDEFGYL	17.9816	2.3557	3.7788
renca_755	11	48837641	C	G	0/1	Trim7	ENSMUSG00000040350	ENSMUST00000046903	31-39	510	39	P/A	missense_variant	1153	1.09996	ICLEFFREA	37.0236	16.3089	42.1814
renca_756	11	48837641	C	G	0/1	Trim7	ENSMUSG00000040350	ENSMUST00000046903	32-40	510	39	P/A	missense_variant	1153	1.09996	CLEFFREAV	17.4846	19.7006	18.2767
renca_757	11	48837641	C	G	0/1	Trim7	ENSMUSG00000040350	ENSMUST00000046903	33-41	510	39	P/A	missense_variant	1153	1.09996	LEFFREAVS	65.9282	29.9002	63.8816
renca_758	11	48837641	C	G	0/1	Trim7	ENSMUSG00000040350	ENSMUST00000046903	34-42	510	39	P/A	missense_variant	1153	1.09996	EFFREAVSV	32.371	12.9118	3.1385
renca_759	11	48837641	C	G	0/1	Trim7	ENSMUSG00000040350	ENSMUST00000046903	35-43	510	39	P/A	missense_variant	1153	1.09996	FFREAVSVE	76.3402	39.4286	23.2191
renca_760	11	48837641	C	G	0/1	Trim7	ENSMUSG00000040350	ENSMUST00000046903	36-44	510	39	P/A	missense_variant	1153	1.09996	FREAVSVEC	76.9519	51.2409	64.5219
renca_761	11	48837641	C	G	0/1	Trim7	ENSMUSG00000040350	ENSMUST00000046903	37-45	510	39	P/A	missense_variant	1153	1.09996	REAVSVECG	75.4774	66.0294	65.847
renca_762	11	48837641	C	G	0/1	Trim7	ENSMUSG00000040350	ENSMUST00000046903	38-46	510	39	P/A	missense_variant	1153	1.09996	EAVSVECGH	92.7197	73.4083	93.9579
renca_763	11	48837641	C	G	0/1	Trim7	ENSMUSG00000040350	ENSMUST00000046903	39-47	510	39	P/A	missense_variant	1153	1.09996	AVSVECGHS	82.0571	85.4929	60.7757
renca_764	11	48866018	G	A	0/1	Irgm1	ENSMUSG00000046879	ENSMUST00000049519	330-338	409	338	S/F	missense_variant	3305	4.12272	MEYKDNMKF	32.5057	3.5068	37.4847
renca_765	11	48866018	G	A	0/1	Irgm1	ENSMUSG00000046879	ENSMUST00000049519	331-339	409	338	S/F	missense_variant	3305	4.12272	EYKDNMKFQ	95.1644	71.8973	61.8439
renca_766	11	48866018	G	A	0/1	Irgm1	ENSMUSG00000046879	ENSMUST00000049519	332-340	409	338	S/F	missense_variant	3305	4.12272	YKDNMKFQN	88.5028	72.1859	84.6148
renca_767	11	48866018	G	A	0/1	Irgm1	ENSMUSG00000046879	ENSMUST00000049519	333-341	409	338	S/F	missense_variant	3305	4.12272	KDNMKFQNF	6.6613	8.1558	47.5067
renca_768	11	48866018	G	A	0/1	Irgm1	ENSMUSG00000046879	ENSMUST00000049519	334-342	409	338	S/F	missense_variant	3305	4.12272	DNMKFQNFY	25.2027	7.2418	47.9915
renca_769	11	48866018	G	A	0/1	Irgm1	ENSMUSG00000046879	ENSMUST00000049519	335-343	409	338	S/F	missense_variant	3305	4.12272	NMKFQNFYT	51.0379	17.0543	28.3845
renca_770	11	48866018	G	A	0/1	Irgm1	ENSMUSG00000046879	ENSMUST00000049519	336-344	409	338	S/F	missense_variant	3305	4.12272	MKFQNFYTL	2.5506	0.2044	1.4743
renca_771	11	48866018	G	A	0/1	Irgm1	ENSMUSG00000046879	ENSMUST00000049519	337-345	409	338	S/F	missense_variant	3305	4.12272	KFQNFYTLR	27.9848	23.7451	21.2524
renca_772	11	48866018	G	A	0/1	Irgm1	ENSMUSG00000046879	ENSMUST00000049519	338-346	409	338	S/F	missense_variant	3305	4.12272	FQNFYTLRR	40.2599	30.0303	34.878
renca_773	11	48866391	T	A	0/1	Irgm1	ENSMUSG00000046879	ENSMUST00000049519	206-214	409	214	I/F	missense_variant	3305	4.12272	LLQNIQENF	15.4617	5.8762	21.4906
renca_774	11	48866391	T	A	0/1	Irgm1	ENSMUSG00000046879	ENSMUST00000049519	207-215	409	214	I/F	missense_variant	3305	4.12272	LQNIQENFR	74.6909	50.2789	53.9919
renca_775	11	48866391	T	A	0/1	Irgm1	ENSMUSG00000046879	ENSMUST00000049519	208-216	409	214	I/F	missense_variant	3305	4.12272	QNIQENFRE	66.4812	66.093	86.6868
renca_776	11	48866391	T	A	0/1	Irgm1	ENSMUSG00000046879	ENSMUST00000049519	209-217	409	214	I/F	missense_variant	3305	4.12272	NIQENFREN	85.8022	45.5141	57.6558
renca_777	11	48866391	T	A	0/1	Irgm1	ENSMUSG00000046879	ENSMUST00000049519	210-218	409	214	I/F	missense_variant	3305	4.12272	IQENFRENL	9.2872	3.5674	9.0885
renca_778	11	48866391	T	A	0/1	Irgm1	ENSMUSG00000046879	ENSMUST00000049519	211-219	409	214	I/F	missense_variant	3305	4.12272	QENFRENLQ	95.1554	65.4571	96.019
renca_779	11	48866391	T	A	0/1	Irgm1	ENSMUSG00000046879	ENSMUST00000049519	212-220	409	214	I/F	missense_variant	3305	4.12272	ENFRENLQK	48.3987	47.386	66.4951
renca_780	11	48866391	T	A	0/1	Irgm1	ENSMUSG00000046879	ENSMUST00000049519	213-221	409	214	I/F	missense_variant	3305	4.12272	NFRENLQKE	92.598	57.0125	44.6757
renca_781	11	48866391	T	A	0/1	Irgm1	ENSMUSG00000046879	ENSMUST00000049519	214-222	409	214	I/F	missense_variant	3305	4.12272	FRENLQKEK	90.8403	83.8031	73.77
renca_782	11	50171166	A	G	0/1	Tbc1d9b	ENSMUSG00000036644	ENSMUST00000093138	1159-1167	1246	1167	D/G	missense_variant	5905	6.65679	LQCEDLTEG	86.1342	83.5276	44.3866
renca_783	11	50171166	A	G	0/1	Tbc1d9b	ENSMUSG00000036644	ENSMUST00000093138	1160-1168	1246	1167	D/G	missense_variant	5905	6.65679	QCEDLTEGT	96.2319	96.916	96.6429
renca_784	11	50171166	A	G	0/1	Tbc1d9b	ENSMUSG00000036644	ENSMUST00000093138	1161-1169	1246	1167	D/G	missense_variant	5905	6.65679	CEDLTEGTV	37.3925	32.3747	31.8146
renca_785	11	50171166	A	G	0/1	Tbc1d9b	ENSMUSG00000036644	ENSMUST00000093138	1162-1170	1246	1167	D/G	missense_variant	5905	6.65679	EDLTEGTVL	53.8396	14.1675	35.1913
renca_786	11	50171166	A	G	0/1	Tbc1d9b	ENSMUSG00000036644	ENSMUST00000093138	1163-1171	1246	1167	D/G	missense_variant	5905	6.65679	DLTEGTVLV	49.6048	39.5644	41.1722
renca_787	11	50171166	A	G	0/1	Tbc1d9b	ENSMUSG00000036644	ENSMUST00000093138	1164-1172	1246	1167	D/G	missense_variant	5905	6.65679	LTEGTVLVG	51.6043	74.2233	81.9469
renca_788	11	50171166	A	G	0/1	Tbc1d9b	ENSMUSG00000036644	ENSMUST00000093138	1165-1173	1246	1167	D/G	missense_variant	5905	6.65679	TEGTVLVGG	92.3634	63.0653	87.7644
renca_789	11	50171166	A	G	0/1	Tbc1d9b	ENSMUSG00000036644	ENSMUST00000093138	1166-1174	1246	1167	D/G	missense_variant	5905	6.65679	EGTVLVGGG	52.6052	66.9396	81.3207
renca_790	11	50171166	A	G	0/1	Tbc1d9b	ENSMUSG00000036644	ENSMUST00000093138	1167-1175	1246	1167	D/G	missense_variant	5905	6.65679	GTVLVGGGA	81.4019	76.5236	54.7884
renca_791	11	51830516	T	C	0/1	Jade2	ENSMUSG00000020387	ENSMUST00000020655	187-195	829	195	E/G	missense_variant	1729	1.16458	ETQEGLGIG	79.3564	74.6477	78.2959
renca_792	11	51830516	T	C	0/1	Jade2	ENSMUSG00000020387	ENSMUST00000020655	188-196	829	195	E/G	missense_variant	1729	1.16458	TQEGLGIGY	79.8055	38.8923	85.4299
renca_793	11	51830516	T	C	0/1	Jade2	ENSMUSG00000020387	ENSMUST00000020655	189-197	829	195	E/G	missense_variant	1729	1.16458	QEGLGIGYD	96.4199	79.3345	93.2847
renca_794	11	51830516	T	C	0/1	Jade2	ENSMUSG00000020387	ENSMUST00000020655	190-198	829	195	E/G	missense_variant	1729	1.16458	EGLGIGYDE	72.0845	34.2427	89.5097
renca_795	11	51830516	T	C	0/1	Jade2	ENSMUSG00000020387	ENSMUST00000020655	191-199	829	195	E/G	missense_variant	1729	1.16458	GLGIGYDED	94.4091	97.0112	90.3535
renca_796	11	51830516	T	C	0/1	Jade2	ENSMUSG00000020387	ENSMUST00000020655	192-200	829	195	E/G	missense_variant	1729	1.16458	LGIGYDEDV	18.2353	20.0494	35.411
renca_797	11	51830516	T	C	0/1	Jade2	ENSMUSG00000020387	ENSMUST00000020655	193-201	829	195	E/G	missense_variant	1729	1.16458	GIGYDEDVV	76.9661	89.0142	63.9067
renca_798	11	51830516	T	C	0/1	Jade2	ENSMUSG00000020387	ENSMUST00000020655	194-202	829	195	E/G	missense_variant	1729	1.16458	IGYDEDVVC	20.3785	36.6142	67.8952
renca_799	11	51830516	T	C	0/1	Jade2	ENSMUSG00000020387	ENSMUST00000020655	195-203	829	195	E/G	missense_variant	1729	1.16458	GYDEDVVCD	95.2531	96.6155	69.6988
renca_800	11	59210104	G	A	0/1	2310033P09Rik	ENSMUSG00000020441	ENSMUST00000020719	214-222	260	222	R/Q	missense_variant&splice_region_variant	767	4.32594	CSSSPSPPQ	43.5087	54.7825	60.7422
renca_801	11	59210104	G	A	0/1	2310033P09Rik	ENSMUSG00000020441	ENSMUST00000020719	215-223	260	222	R/Q	missense_variant&splice_region_variant	767	4.32594	SSSPSPPQP	41.8026	71.736	52.012
renca_802	11	59210104	G	A	0/1	2310033P09Rik	ENSMUSG00000020441	ENSMUST00000020719	216-224	260	222	R/Q	missense_variant&splice_region_variant	767	4.32594	SSPSPPQPR	12.7703	50.3709	44.1257
renca_803	11	59210104	G	A	0/1	2310033P09Rik	ENSMUSG00000020441	ENSMUST00000020719	217-225	260	222	R/Q	missense_variant&splice_region_variant	767	4.32594	SPSPPQPRH	89.471	29.0669	96.3889
renca_804	11	59210104	G	A	0/1	2310033P09Rik	ENSMUSG00000020441	ENSMUST00000020719	218-226	260	222	R/Q	missense_variant&splice_region_variant	767	4.32594	PSPPQPRHQ	81.1713	97.2662	97.4945
renca_805	11	59210104	G	A	0/1	2310033P09Rik	ENSMUSG00000020441	ENSMUST00000020719	219-227	260	222	R/Q	missense_variant&splice_region_variant	767	4.32594	SPPQPRHQR	41.8206	14.9257	86.502
renca_806	11	59210104	G	A	0/1	2310033P09Rik	ENSMUSG00000020441	ENSMUST00000020719	220-228	260	222	R/Q	missense_variant&splice_region_variant	767	4.32594	PPQPRHQRH	95.9496	61.559	97.4117
renca_807	11	59210104	G	A	0/1	2310033P09Rik	ENSMUSG00000020441	ENSMUST00000020719	221-229	260	222	R/Q	missense_variant&splice_region_variant	767	4.32594	PQPRHQRHS	72.6236	95.5787	86.4874
renca_808	11	59210104	G	A	0/1	2310033P09Rik	ENSMUSG00000020441	ENSMUST00000020719	222-230	260	222	R/Q	missense_variant&splice_region_variant	767	4.32594	QPRHQRHSD	95.7266	43.7377	96.3028
renca_809	11	60189424	C	A	0/1	Rai1	ENSMUSG00000062115	ENSMUST00000064190	1430-1438	1889	1438	P/Q	missense_variant	2431	1.837	GPLEKRPCQ	95.24	22.1276	95.2359
renca_810	11	60189424	C	A	0/1	Rai1	ENSMUSG00000062115	ENSMUST00000064190	1431-1439	1889	1438	P/Q	missense_variant	2431	1.837	PLEKRPCQG	92.503	96.9721	97.2467
renca_811	11	60189424	C	A	0/1	Rai1	ENSMUSG00000062115	ENSMUST00000064190	1432-1440	1889	1438	P/Q	missense_variant	2431	1.837	LEKRPCQGQ	96.4923	87.5355	95.5105
renca_812	11	60189424	C	A	0/1	Rai1	ENSMUSG00000062115	ENSMUST00000064190	1433-1441	1889	1438	P/Q	missense_variant	2431	1.837	EKRPCQGQP	96.7754	89.4862	94.9093
renca_813	11	60189424	C	A	0/1	Rai1	ENSMUSG00000062115	ENSMUST00000064190	1434-1442	1889	1438	P/Q	missense_variant	2431	1.837	KRPCQGQPL	8.1604	14.3311	6.0833
renca_814	11	60189424	C	A	0/1	Rai1	ENSMUSG00000062115	ENSMUST00000064190	1435-1443	1889	1438	P/Q	missense_variant	2431	1.837	RPCQGQPLL	16.8611	0.2286	19.2995
renca_815	11	60189424	C	A	0/1	Rai1	ENSMUSG00000062115	ENSMUST00000064190	1436-1444	1889	1438	P/Q	missense_variant	2431	1.837	PCQGQPLLL	50.668	46.2141	77.9802
renca_816	11	60189424	C	A	0/1	Rai1	ENSMUSG00000062115	ENSMUST00000064190	1437-1445	1889	1438	P/Q	missense_variant	2431	1.837	CQGQPLLLA	43.3166	52.8193	27.8357
renca_817	11	60189424	C	A	0/1	Rai1	ENSMUSG00000062115	ENSMUST00000064190	1438-1446	1889	1438	P/Q	missense_variant	2431	1.837	QGQPLLLAP	23.6827	35.2718	45.1309
renca_818	11	60753960	T	G	0/1	Top3a	ENSMUSG00000002814	ENSMUST00000002891	298-306	1003	306	D/A	missense_variant&splice_region_variant	2542	4.0059	VLYQLCMEA	29.9087	22.081	19.882
renca_819	11	60753960	T	G	0/1	Top3a	ENSMUSG00000002814	ENSMUST00000002891	299-307	1003	306	D/A	missense_variant&splice_region_variant	2542	4.0059	LYQLCMEAP	59.791	54.2108	4.8145
renca_820	11	60753960	T	G	0/1	Top3a	ENSMUSG00000002814	ENSMUST00000002891	300-308	1003	306	D/A	missense_variant&splice_region_variant	2542	4.0059	YQLCMEAPM	9.4482	1.4026	0.5459
renca_821	11	60753960	T	G	0/1	Top3a	ENSMUSG00000002814	ENSMUST00000002891	301-309	1003	306	D/A	missense_variant&splice_region_variant	2542	4.0059	QLCMEAPMA	80.7796	84.8645	66.946
renca_822	11	60753960	T	G	0/1	Top3a	ENSMUSG00000002814	ENSMUST00000002891	302-310	1003	306	D/A	missense_variant&splice_region_variant	2542	4.0059	LCMEAPMAT	80.4173	35.6853	46.5282
renca_823	11	60753960	T	G	0/1	Top3a	ENSMUSG00000002814	ENSMUST00000002891	303-311	1003	306	D/A	missense_variant&splice_region_variant	2542	4.0059	CMEAPMATV	15.7329	24.883	3.8779
renca_824	11	60753960	T	G	0/1	Top3a	ENSMUSG00000002814	ENSMUST00000002891	304-312	1003	306	D/A	missense_variant&splice_region_variant	2542	4.0059	MEAPMATVV	30.7032	3.2415	3.1842
renca_825	11	60753960	T	G	0/1	Top3a	ENSMUSG00000002814	ENSMUST00000002891	305-313	1003	306	D/A	missense_variant&splice_region_variant	2542	4.0059	EAPMATVVE	36.7621	49.1893	76.2568
renca_826	11	60753960	T	G	0/1	Top3a	ENSMUSG00000002814	ENSMUST00000002891	306-314	1003	306	D/A	missense_variant&splice_region_variant	2542	4.0059	APMATVVEV	28.2438	0.12	4.3619
renca_827	11	62265532	A	C	0/1	Adora2b	ENSMUSG00000018500	ENSMUST00000018644	261-269	332	269	K/T	missense_variant	208	0.817062	PALAKDKPT	93.5362	83.6359	73.0817
renca_828	11	62265532	A	C	0/1	Adora2b	ENSMUSG00000018500	ENSMUST00000018644	262-270	332	269	K/T	missense_variant	208	0.817062	ALAKDKPTW	18.8862	32.4271	20.5265
renca_829	11	62265532	A	C	0/1	Adora2b	ENSMUSG00000018500	ENSMUST00000018644	263-271	332	269	K/T	missense_variant	208	0.817062	LAKDKPTWV	27.3649	10.5799	23.5783
renca_830	11	62265532	A	C	0/1	Adora2b	ENSMUSG00000018500	ENSMUST00000018644	264-272	332	269	K/T	missense_variant	208	0.817062	AKDKPTWVM	40.4247	13.169	44.0975
renca_831	11	62265532	A	C	0/1	Adora2b	ENSMUSG00000018500	ENSMUST00000018644	265-273	332	269	K/T	missense_variant	208	0.817062	KDKPTWVMN	79.2893	57.8344	92.2179
renca_832	11	62265532	A	C	0/1	Adora2b	ENSMUSG00000018500	ENSMUST00000018644	266-274	332	269	K/T	missense_variant	208	0.817062	DKPTWVMNV	28.5552	25.9345	40.9417
renca_833	11	62265532	A	C	0/1	Adora2b	ENSMUSG00000018500	ENSMUST00000018644	267-275	332	269	K/T	missense_variant	208	0.817062	KPTWVMNVA	35.903	2.226	23.1239
renca_834	11	62265532	A	C	0/1	Adora2b	ENSMUSG00000018500	ENSMUST00000018644	268-276	332	269	K/T	missense_variant	208	0.817062	PTWVMNVAI	19.6517	15.8873	18.8535
renca_835	11	62265532	A	C	0/1	Adora2b	ENSMUSG00000018500	ENSMUST00000018644	269-277	332	269	K/T	missense_variant	208	0.817062	TWVMNVAIL	9.3939	6.9333	0.9274
renca_836	11	69303227	T	G	0/1	Cntrob	ENSMUSG00000032782	ENSMUST00000092973	733-741	887	741	Q/H	missense_variant	3958	4.30715	VSSWEEAPH	45.2795	64.8771	83.6224
renca_837	11	69303227	T	G	0/1	Cntrob	ENSMUSG00000032782	ENSMUST00000092973	734-742	887	741	Q/H	missense_variant	3958	4.30715	SSWEEAPHV	8.4053	6.0881	7.5443
renca_838	11	69303227	T	G	0/1	Cntrob	ENSMUSG00000032782	ENSMUST00000092973	735-743	887	741	Q/H	missense_variant	3958	4.30715	SWEEAPHVP	74.7356	70.3183	29.7175
renca_839	11	69303227	T	G	0/1	Cntrob	ENSMUSG00000032782	ENSMUST00000092973	736-744	887	741	Q/H	missense_variant	3958	4.30715	WEEAPHVPR	80.5674	34.9847	73.6046
renca_840	11	69303227	T	G	0/1	Cntrob	ENSMUSG00000032782	ENSMUST00000092973	737-745	887	741	Q/H	missense_variant	3958	4.30715	EEAPHVPRL	31.4138	5.5262	29.8829
renca_841	11	69303227	T	G	0/1	Cntrob	ENSMUSG00000032782	ENSMUST00000092973	738-746	887	741	Q/H	missense_variant	3958	4.30715	EAPHVPRLP	51.8909	73.7733	81.4023
renca_842	11	69303227	T	G	0/1	Cntrob	ENSMUSG00000032782	ENSMUST00000092973	739-747	887	741	Q/H	missense_variant	3958	4.30715	APHVPRLPP	68.4961	7.065	47.1218
renca_843	11	69303227	T	G	0/1	Cntrob	ENSMUSG00000032782	ENSMUST00000092973	740-748	887	741	Q/H	missense_variant	3958	4.30715	PHVPRLPPP	82.112	83.2565	24.2526
renca_844	11	69303227	T	G	0/1	Cntrob	ENSMUSG00000032782	ENSMUST00000092973	741-749	887	741	Q/H	missense_variant	3958	4.30715	HVPRLPPPV	5.9186	12.9043	7.4535
renca_845	11	69403622	T	G	0/1	Kdm6b	ENSMUSG00000018476	ENSMUST00000094077	1200-1208	1641	1208	N/T	missense_variant	1436	1.49661	LQFCTDPRT	65.414	47.3744	33.6585
renca_846	11	69403622	T	G	0/1	Kdm6b	ENSMUSG00000018476	ENSMUST00000094077	1201-1209	1641	1208	N/T	missense_variant	1436	1.49661	QFCTDPRTP	96.2734	95.037	47.7856
renca_847	11	69403622	T	G	0/1	Kdm6b	ENSMUSG00000018476	ENSMUST00000094077	1202-1210	1641	1208	N/T	missense_variant	1436	1.49661	FCTDPRTPI	34.368	19.917	10.012
renca_848	11	69403622	T	G	0/1	Kdm6b	ENSMUSG00000018476	ENSMUST00000094077	1203-1211	1641	1208	N/T	missense_variant	1436	1.49661	CTDPRTPIT	29.1045	47.4488	68.1033
renca_849	11	69403622	T	G	0/1	Kdm6b	ENSMUSG00000018476	ENSMUST00000094077	1204-1212	1641	1208	N/T	missense_variant	1436	1.49661	TDPRTPITV	10.2418	28.0821	39.958
renca_850	11	69403622	T	G	0/1	Kdm6b	ENSMUSG00000018476	ENSMUST00000094077	1205-1213	1641	1208	N/T	missense_variant	1436	1.49661	DPRTPITVI	50.9732	3.8281	33.8881
renca_851	11	69403622	T	G	0/1	Kdm6b	ENSMUSG00000018476	ENSMUST00000094077	1206-1214	1641	1208	N/T	missense_variant	1436	1.49661	PRTPITVIR	96.5948	87.3977	91.1835
renca_852	11	69403622	T	G	0/1	Kdm6b	ENSMUSG00000018476	ENSMUST00000094077	1207-1215	1641	1208	N/T	missense_variant	1436	1.49661	RTPITVIRG	4.2893	53.7869	64.343
renca_853	11	69403622	T	G	0/1	Kdm6b	ENSMUSG00000018476	ENSMUST00000094077	1208-1216	1641	1208	N/T	missense_variant	1436	1.49661	TPITVIRGL	31.431	0.2017	12.9017
renca_854	11	69588703	C	T	0/1	Trp53	ENSMUSG00000059552	ENSMUST00000005371	199-207	387	207	R/C	missense_variant	3705	6.63832	YLEDRQTFC	37.0513	48.6869	56.6531
renca_855	11	69588703	C	T	0/1	Trp53	ENSMUSG00000059552	ENSMUST00000005371	200-208	387	207	R/C	missense_variant	3705	6.63832	LEDRQTFCH	86.2033	54.7211	96.1793
renca_856	11	69588703	C	T	0/1	Trp53	ENSMUSG00000059552	ENSMUST00000005371	201-209	387	207	R/C	missense_variant	3705	6.63832	EDRQTFCHS	77.6167	43.5902	84.444
renca_857	11	69588703	C	T	0/1	Trp53	ENSMUSG00000059552	ENSMUST00000005371	202-210	387	207	R/C	missense_variant	3705	6.63832	DRQTFCHSV	27.0134	8.8716	13.5328
renca_858	11	69588703	C	T	0/1	Trp53	ENSMUSG00000059552	ENSMUST00000005371	203-211	387	207	R/C	missense_variant	3705	6.63832	RQTFCHSVV	7.893	6.9966	1.5942
renca_859	11	69588703	C	T	0/1	Trp53	ENSMUSG00000059552	ENSMUST00000005371	204-212	387	207	R/C	missense_variant	3705	6.63832	QTFCHSVVV	4.9621	6.6227	7.2938
renca_860	11	69588703	C	T	0/1	Trp53	ENSMUSG00000059552	ENSMUST00000005371	205-213	387	207	R/C	missense_variant	3705	6.63832	TFCHSVVVP	82.4597	85.7936	24.0488
renca_861	11	69588703	C	T	0/1	Trp53	ENSMUSG00000059552	ENSMUST00000005371	206-214	387	207	R/C	missense_variant	3705	6.63832	FCHSVVVPY	52.4572	20.7627	70.0703
renca_862	11	69588703	C	T	0/1	Trp53	ENSMUSG00000059552	ENSMUST00000005371	207-215	387	207	R/C	missense_variant	3705	6.63832	CHSVVVPYE	53.4605	32.5396	17.034
renca_863	11	69889251	A	T	0/1	Acap1	ENSMUSG00000001588	ENSMUST00000001631	272-280	740	280	F/L	missense_variant	13209	19.6253	LFKRASNAL	16.3376	3.6427	0.8982
renca_864	11	69889251	A	T	0/1	Acap1	ENSMUSG00000001588	ENSMUST00000001631	273-281	740	280	F/L	missense_variant	13209	19.6253	FKRASNALK	75.4703	43.9836	43.2027
renca_865	11	69889251	A	T	0/1	Acap1	ENSMUSG00000001588	ENSMUST00000001631	274-282	740	280	F/L	missense_variant	13209	19.6253	KRASNALKT	72.9052	56.8719	21.6303
renca_866	11	69889251	A	T	0/1	Acap1	ENSMUSG00000001588	ENSMUST00000001631	275-283	740	280	F/L	missense_variant	13209	19.6253	RASNALKTW	3.9084	18.2953	21.3683
renca_867	11	69889251	A	T	0/1	Acap1	ENSMUSG00000001588	ENSMUST00000001631	276-284	740	280	F/L	missense_variant	13209	19.6253	ASNALKTWS	45.8058	37.5866	25.0396
renca_868	11	69889251	A	T	0/1	Acap1	ENSMUSG00000001588	ENSMUST00000001631	277-285	740	280	F/L	missense_variant	13209	19.6253	SNALKTWSR	19.7798	22.0146	34.7611
renca_869	11	69889251	A	T	0/1	Acap1	ENSMUSG00000001588	ENSMUST00000001631	278-286	740	280	F/L	missense_variant	13209	19.6253	NALKTWSRR	55.9841	14.8129	30.0829
renca_870	11	69889251	A	T	0/1	Acap1	ENSMUSG00000001588	ENSMUST00000001631	279-287	740	280	F/L	missense_variant	13209	19.6253	ALKTWSRRW	23.4251	32.1164	46.4153
renca_871	11	69889251	A	T	0/1	Acap1	ENSMUSG00000001588	ENSMUST00000001631	280-288	740	280	F/L	missense_variant	13209	19.6253	LKTWSRRWF	27.9884	12.5556	29.1877
renca_872	11	70436749	T	G	0/1	Arrb2	ENSMUSG00000060216	ENSMUST00000079056	109-117	421	117	F/V	missense_variant	4568	11.6368	LGQHAHPFV	1.6253	3.2037	10.9262
renca_873	11	70436749	T	G	0/1	Arrb2	ENSMUSG00000060216	ENSMUST00000079056	110-118	421	117	F/V	missense_variant	4568	11.6368	GQHAHPFVF	6.2241	1.9793	5.3111
renca_874	11	70436749	T	G	0/1	Arrb2	ENSMUSG00000060216	ENSMUST00000079056	111-119	421	117	F/V	missense_variant	4568	11.6368	QHAHPFVFT	36.0194	21.0521	10.1697
renca_875	11	70436749	T	G	0/1	Arrb2	ENSMUSG00000060216	ENSMUST00000079056	112-120	421	117	F/V	missense_variant	4568	11.6368	HAHPFVFTI	0.625	0.3395	1.3835
renca_876	11	70436749	T	G	0/1	Arrb2	ENSMUSG00000060216	ENSMUST00000079056	113-121	421	117	F/V	missense_variant	4568	11.6368	AHPFVFTIP	12.4782	33.3269	7.7515
renca_877	11	70436749	T	G	0/1	Arrb2	ENSMUSG00000060216	ENSMUST00000079056	114-122	421	117	F/V	missense_variant	4568	11.6368	HPFVFTIPQ	57.8307	2.1529	79.2138
renca_878	11	70436749	T	G	0/1	Arrb2	ENSMUSG00000060216	ENSMUST00000079056	115-123	421	117	F/V	missense_variant	4568	11.6368	PFVFTIPQN	96.4947	95.9628	78.4992
renca_879	11	70436749	T	G	0/1	Arrb2	ENSMUSG00000060216	ENSMUST00000079056	116-124	421	117	F/V	missense_variant	4568	11.6368	FVFTIPQNL	9.9968	1.3263	2.7431
renca_880	11	70436749	T	G	0/1	Arrb2	ENSMUSG00000060216	ENSMUST00000079056	117-125	421	117	F/V	missense_variant	4568	11.6368	VFTIPQNLP	70.4087	73.8582	33.937
renca_881	11	70542775	G	A	0/1	Pld2	ENSMUSG00000020828	ENSMUST00000018429	202-210	933	210	R/Q	missense_variant	3539	4.10251	SKGLEGVIQ	96.7201	96.1077	96.9773
renca_882	11	70542775	G	A	0/1	Pld2	ENSMUSG00000020828	ENSMUST00000018429	203-211	933	210	R/Q	missense_variant	3539	4.10251	KGLEGVIQK	13.0086	33.741	37.5812
renca_883	11	70542775	G	A	0/1	Pld2	ENSMUSG00000020828	ENSMUST00000018429	204-212	933	210	R/Q	missense_variant	3539	4.10251	GLEGVIQKR	96.4589	95.4592	94.2545
renca_884	11	70542775	G	A	0/1	Pld2	ENSMUSG00000020828	ENSMUST00000018429	205-213	933	210	R/Q	missense_variant	3539	4.10251	LEGVIQKRS	96.2433	78.796	91.4448
renca_885	11	70542775	G	A	0/1	Pld2	ENSMUSG00000020828	ENSMUST00000018429	206-214	933	210	R/Q	missense_variant	3539	4.10251	EGVIQKRSG	66.2678	66.0016	84.8311
renca_886	11	70542775	G	A	0/1	Pld2	ENSMUSG00000020828	ENSMUST00000018429	207-215	933	210	R/Q	missense_variant	3539	4.10251	GVIQKRSGG	82.1779	71.8718	55.3463
renca_887	11	70542775	G	A	0/1	Pld2	ENSMUSG00000020828	ENSMUST00000018429	208-216	933	210	R/Q	missense_variant	3539	4.10251	VIQKRSGGH	89.6058	74.9194	95.8985
renca_888	11	70542775	G	A	0/1	Pld2	ENSMUSG00000020828	ENSMUST00000018429	209-217	933	210	R/Q	missense_variant	3539	4.10251	IQKRSGGHR	87.9806	60.4354	47.3934
renca_889	11	70542775	G	A	0/1	Pld2	ENSMUSG00000020828	ENSMUST00000018429	210-218	933	210	R/Q	missense_variant	3539	4.10251	QKRSGGHRV	80.4868	29.9989	37.0046
renca_890	11	70920933	T	G	0/1	Rabep1	ENSMUSG00000020817	ENSMUST00000076270	576-584	862	584	F/V	missense_variant	10400	10.9747	KEKQELEDV	77.3126	42.0339	52.8627
renca_891	11	70920933	T	G	0/1	Rabep1	ENSMUSG00000020817	ENSMUST00000076270	577-585	862	584	F/V	missense_variant	10400	10.9747	EKQELEDVL	54.3897	25.6997	53.6369
renca_892	11	70920933	T	G	0/1	Rabep1	ENSMUSG00000020817	ENSMUST00000076270	578-586	862	584	F/V	missense_variant	10400	10.9747	KQELEDVLK	66.1384	76.7601	75.8598
renca_893	11	70920933	T	G	0/1	Rabep1	ENSMUSG00000020817	ENSMUST00000076270	579-587	862	584	F/V	missense_variant	10400	10.9747	QELEDVLKQ	97.2221	82.9359	96.0597
renca_894	11	70920933	T	G	0/1	Rabep1	ENSMUSG00000020817	ENSMUST00000076270	580-588	862	584	F/V	missense_variant	10400	10.9747	ELEDVLKQS	97.419	95.8845	95.7416
renca_895	11	70920933	T	G	0/1	Rabep1	ENSMUSG00000020817	ENSMUST00000076270	581-589	862	584	F/V	missense_variant	10400	10.9747	LEDVLKQSA	82.8917	43.2336	65.8708
renca_896	11	70920933	T	G	0/1	Rabep1	ENSMUSG00000020817	ENSMUST00000076270	582-590	862	584	F/V	missense_variant	10400	10.9747	EDVLKQSAE	94.4566	85.2924	94.5804
renca_897	11	70920933	T	G	0/1	Rabep1	ENSMUSG00000020817	ENSMUST00000076270	583-591	862	584	F/V	missense_variant	10400	10.9747	DVLKQSAED	95.7982	81.3324	88.9462
renca_898	11	70920933	T	G	0/1	Rabep1	ENSMUSG00000020817	ENSMUST00000076270	584-592	862	584	F/V	missense_variant	10400	10.9747	VLKQSAEDS	91.7013	85.8981	71.673
renca_899	11	71001656	T	G	0/1	Dhx33	ENSMUSG00000040620	ENSMUST00000108527	88-96	698	96	T/P	missense_variant	5887	4.25342	GETGSGKTP	97.3751	91.6979	85.3275
renca_900	11	71001656	T	G	0/1	Dhx33	ENSMUSG00000040620	ENSMUST00000108527	89-97	698	96	T/P	missense_variant	5887	4.25342	ETGSGKTPQ	95.205	77.2285	89.5188
renca_901	11	71001656	T	G	0/1	Dhx33	ENSMUSG00000040620	ENSMUST00000108527	90-98	698	96	T/P	missense_variant	5887	4.25342	TGSGKTPQI	2.6071	8.0621	14.9386
renca_902	11	71001656	T	G	0/1	Dhx33	ENSMUSG00000040620	ENSMUST00000108527	91-99	698	96	T/P	missense_variant	5887	4.25342	GSGKTPQIP	78.9604	96.57	83.7666
renca_903	11	71001656	T	G	0/1	Dhx33	ENSMUSG00000040620	ENSMUST00000108527	92-100	698	96	T/P	missense_variant	5887	4.25342	SGKTPQIPQ	48.1775	42.1514	76.342
renca_904	11	71001656	T	G	0/1	Dhx33	ENSMUSG00000040620	ENSMUST00000108527	93-101	698	96	T/P	missense_variant	5887	4.25342	GKTPQIPQY	93.9103	76.3923	88.3754
renca_905	11	71001656	T	G	0/1	Dhx33	ENSMUSG00000040620	ENSMUST00000108527	94-102	698	96	T/P	missense_variant	5887	4.25342	KTPQIPQYL	0.1497	4.7175	3.8896
renca_906	11	71001656	T	G	0/1	Dhx33	ENSMUSG00000040620	ENSMUST00000108527	95-103	698	96	T/P	missense_variant	5887	4.25342	TPQIPQYLY	44.4273	0.6208	87.2466
renca_907	11	71001656	T	G	0/1	Dhx33	ENSMUSG00000040620	ENSMUST00000108527	96-104	698	96	T/P	missense_variant	5887	4.25342	PQIPQYLYE	73.774	67.655	57.4819
renca_908	11	73185286	C	T	0/1	Ctns	ENSMUSG00000005949	ENSMUST00000006103	300-308	367	308	G/R	missense_variant	2642	5.64668	GGVLLDFTR	29.8418	41.1696	59.4812
renca_909	11	73185286	C	T	0/1	Ctns	ENSMUSG00000005949	ENSMUST00000006103	301-309	367	308	G/R	missense_variant	2642	5.64668	GVLLDFTRG	74.169	70.1273	53.9599
renca_910	11	73185286	C	T	0/1	Ctns	ENSMUSG00000005949	ENSMUST00000006103	302-310	367	308	G/R	missense_variant	2642	5.64668	VLLDFTRGS	70.5254	59.4094	58.7054
renca_911	11	73185286	C	T	0/1	Ctns	ENSMUSG00000005949	ENSMUST00000006103	303-311	367	308	G/R	missense_variant	2642	5.64668	LLDFTRGSF	10.2736	7.6723	25.9747
renca_912	11	73185286	C	T	0/1	Ctns	ENSMUSG00000005949	ENSMUST00000006103	304-312	367	308	G/R	missense_variant	2642	5.64668	LDFTRGSFS	50.1549	21.6452	45.9989
renca_913	11	73185286	C	T	0/1	Ctns	ENSMUSG00000005949	ENSMUST00000006103	305-313	367	308	G/R	missense_variant	2642	5.64668	DFTRGSFSL	13.4099	4.1087	4.167
renca_914	11	73185286	C	T	0/1	Ctns	ENSMUSG00000005949	ENSMUST00000006103	306-314	367	308	G/R	missense_variant	2642	5.64668	FTRGSFSLL	1.9288	1.7422	3.2418
renca_915	11	73185286	C	T	0/1	Ctns	ENSMUSG00000005949	ENSMUST00000006103	307-315	367	308	G/R	missense_variant	2642	5.64668	TRGSFSLLQ	67.1475	44.3631	76.5298
renca_916	11	73185286	C	T	0/1	Ctns	ENSMUSG00000005949	ENSMUST00000006103	308-316	367	308	G/R	missense_variant	2642	5.64668	RGSFSLLQM	0.6252	3.4525	9.9898
renca_917	11	75156288	A	C	0/1	Smg6	ENSMUSG00000038290	ENSMUST00000045281	1261-1269	1418	1269	K/T	missense_variant	4899	4.20034	LARLLESRT	65.3493	40.964	51.4509
renca_918	11	75156288	A	C	0/1	Smg6	ENSMUSG00000038290	ENSMUST00000045281	1262-1270	1418	1269	K/T	missense_variant	4899	4.20034	ARLLESRTY	66.5136	32.766	46.9801
renca_919	11	75156288	A	C	0/1	Smg6	ENSMUSG00000038290	ENSMUST00000045281	1263-1271	1418	1269	K/T	missense_variant	4899	4.20034	RLLESRTYI	8.8569	1.8177	0.2411
renca_920	11	75156288	A	C	0/1	Smg6	ENSMUSG00000038290	ENSMUST00000045281	1264-1272	1418	1269	K/T	missense_variant	4899	4.20034	LLESRTYIL	6.6505	5.7771	26.0931
renca_921	11	75156288	A	C	0/1	Smg6	ENSMUSG00000038290	ENSMUST00000045281	1265-1273	1418	1269	K/T	missense_variant	4899	4.20034	LESRTYILV	24.7104	10.2329	24.2075
renca_922	11	75156288	A	C	0/1	Smg6	ENSMUSG00000038290	ENSMUST00000045281	1266-1274	1418	1269	K/T	missense_variant	4899	4.20034	ESRTYILVV	15.6223	12.1901	30.3296
renca_923	11	75156288	A	C	0/1	Smg6	ENSMUSG00000038290	ENSMUST00000045281	1267-1275	1418	1269	K/T	missense_variant	4899	4.20034	SRTYILVVP	69.1397	64.7331	39.7197
renca_924	11	75156288	A	C	0/1	Smg6	ENSMUSG00000038290	ENSMUST00000045281	1268-1276	1418	1269	K/T	missense_variant	4899	4.20034	RTYILVVPL	0.9242	1.5054	5.5649
renca_925	11	75156288	A	C	0/1	Smg6	ENSMUSG00000038290	ENSMUST00000045281	1269-1277	1418	1269	K/T	missense_variant	4899	4.20034	TYILVVPLI	8.1477	5.2321	0.139
renca_926	11	75679646	C	G	0/1	Crk	ENSMUSG00000017776	ENSMUST00000017920	67-75	304	75	P/A	missense_variant	13968	21.4023	PRPPVPPSA	84.1325	84.869	87.0417
renca_927	11	75679646	C	G	0/1	Crk	ENSMUSG00000017776	ENSMUST00000017920	68-76	304	75	P/A	missense_variant	13968	21.4023	RPPVPPSAA	31.177	3.5183	45.035
renca_928	11	75679646	C	G	0/1	Crk	ENSMUSG00000017776	ENSMUST00000017920	69-77	304	75	P/A	missense_variant	13968	21.4023	PPVPPSAAQ	96.9854	64.9895	96.5051
renca_929	11	75679646	C	G	0/1	Crk	ENSMUSG00000017776	ENSMUST00000017920	70-78	304	75	P/A	missense_variant	13968	21.4023	PVPPSAAQP	63.4673	94.1096	83.4137
renca_930	11	75679646	C	G	0/1	Crk	ENSMUSG00000017776	ENSMUST00000017920	71-79	304	75	P/A	missense_variant	13968	21.4023	VPPSAAQPP	32.2591	13.7215	57.6149
renca_931	11	75679646	C	G	0/1	Crk	ENSMUSG00000017776	ENSMUST00000017920	72-80	304	75	P/A	missense_variant	13968	21.4023	PPSAAQPPP	95.179	60.3125	92.7405
renca_932	11	75679646	C	G	0/1	Crk	ENSMUSG00000017776	ENSMUST00000017920	73-81	304	75	P/A	missense_variant	13968	21.4023	PSAAQPPPG	67.3965	88.3584	83.093
renca_933	11	75679646	C	G	0/1	Crk	ENSMUSG00000017776	ENSMUST00000017920	74-82	304	75	P/A	missense_variant	13968	21.4023	SAAQPPPGV	22.2739	10.9756	13.4822
renca_934	11	75679646	C	G	0/1	Crk	ENSMUSG00000017776	ENSMUST00000017920	75-83	304	75	P/A	missense_variant	13968	21.4023	AAQPPPGVS	74.6016	38.959	56.3218
renca_935	11	75679646	C	G	0/1	Crk	ENSMUSG00000017776	ENSMUST00000108426	74-82	82	75	P/A	missense_variant	13968	21.4023	SAAQPPPGR	60.6756	47.2465	64.2996
renca_936	11	77692630	A	G	0/1	Nufip2	ENSMUSG00000037857	ENSMUST00000100802	449-457	692	457	S/G	missense_variant	15053	18.8357	TDSVLQDMG	68.6417	83.5637	88.2345
renca_937	11	77692630	A	G	0/1	Nufip2	ENSMUSG00000037857	ENSMUST00000100802	450-458	692	457	S/G	missense_variant	15053	18.8357	DSVLQDMGL	25.5389	18.7842	44.9083
renca_938	11	77692630	A	G	0/1	Nufip2	ENSMUSG00000037857	ENSMUST00000100802	451-459	692	457	S/G	missense_variant	15053	18.8357	SVLQDMGLA	63.7679	44.9647	22.6082
renca_939	11	77692630	A	G	0/1	Nufip2	ENSMUSG00000037857	ENSMUST00000100802	452-460	692	457	S/G	missense_variant	15053	18.8357	VLQDMGLAS	75.9972	43.543	49.5455
renca_940	11	77692630	A	G	0/1	Nufip2	ENSMUSG00000037857	ENSMUST00000100802	453-461	692	457	S/G	missense_variant	15053	18.8357	LQDMGLASA	46.1059	40.3111	27.8542
renca_941	11	77692630	A	G	0/1	Nufip2	ENSMUSG00000037857	ENSMUST00000100802	454-462	692	457	S/G	missense_variant	15053	18.8357	QDMGLASAA	70.831	26.8794	32.8284
renca_942	11	77692630	A	G	0/1	Nufip2	ENSMUSG00000037857	ENSMUST00000100802	455-463	692	457	S/G	missense_variant	15053	18.8357	DMGLASAAV	33.575	16.6724	13.7246
renca_943	11	77692630	A	G	0/1	Nufip2	ENSMUSG00000037857	ENSMUST00000100802	456-464	692	457	S/G	missense_variant	15053	18.8357	MGLASAAVE	21.2782	16.2227	26.4573
renca_944	11	77692630	A	G	0/1	Nufip2	ENSMUSG00000037857	ENSMUST00000100802	457-465	692	457	S/G	missense_variant	15053	18.8357	GLASAAVEQ	90.7571	85.7686	65.1752
renca_945	11	77832465	A	G	0/1	Myo18a	ENSMUSG00000000631	ENSMUST00000000645	1124-1132	2036	1132	K/E	missense_variant	12689	5.73446	VLAPHLTKE	55.0952	56.4375	48.3513
renca_946	11	77832465	A	G	0/1	Myo18a	ENSMUSG00000000631	ENSMUST00000000645	1125-1133	2036	1132	K/E	missense_variant	12689	5.73446	LAPHLTKEH	53.6315	70.1995	92.0212
renca_947	11	77832465	A	G	0/1	Myo18a	ENSMUSG00000000631	ENSMUST00000000645	1126-1134	2036	1132	K/E	missense_variant	12689	5.73446	APHLTKEHG	80.8785	13.7714	66.004
renca_948	11	77832465	A	G	0/1	Myo18a	ENSMUSG00000000631	ENSMUST00000000645	1127-1135	2036	1132	K/E	missense_variant	12689	5.73446	PHLTKEHGR	95.6867	85.1378	76.1038
renca_949	11	77832465	A	G	0/1	Myo18a	ENSMUSG00000000631	ENSMUST00000000645	1128-1136	2036	1132	K/E	missense_variant	12689	5.73446	HLTKEHGRN	95.4182	95.9755	93.4076
renca_950	11	77832465	A	G	0/1	Myo18a	ENSMUSG00000000631	ENSMUST00000000645	1129-1137	2036	1132	K/E	missense_variant	12689	5.73446	LTKEHGRNY	52.1613	31.7285	75.9644
renca_951	11	77832465	A	G	0/1	Myo18a	ENSMUSG00000000631	ENSMUST00000000645	1130-1138	2036	1132	K/E	missense_variant	12689	5.73446	TKEHGRNYI	45.0817	19.3772	13.5425
renca_952	11	77832465	A	G	0/1	Myo18a	ENSMUSG00000000631	ENSMUST00000000645	1131-1139	2036	1132	K/E	missense_variant	12689	5.73446	KEHGRNYIV	39.5442	7.2528	30.5166
renca_953	11	77832465	A	G	0/1	Myo18a	ENSMUSG00000000631	ENSMUST00000000645	1132-1140	2036	1132	K/E	missense_variant	12689	5.73446	EHGRNYIVV	15.3157	12.0503	4.6211
renca_954	11	78348190	T	G	0/1	Unc119	ENSMUSG00000002058	ENSMUST00000002127	173-181	240	181	F/V	missense_variant	1616	4.7843	KSFDFHFGV	0.3887	1.5941	5.5044
renca_955	11	78348190	T	G	0/1	Unc119	ENSMUSG00000002058	ENSMUST00000002127	174-182	240	181	F/V	missense_variant	1616	4.7843	SFDFHFGVC	15.9316	32.1087	22.0758
renca_956	11	78348190	T	G	0/1	Unc119	ENSMUSG00000002058	ENSMUST00000002127	175-183	240	181	F/V	missense_variant	1616	4.7843	FDFHFGVCI	11.6183	5.4204	24.8698
renca_957	11	78348190	T	G	0/1	Unc119	ENSMUSG00000002058	ENSMUST00000002127	176-184	240	181	F/V	missense_variant	1616	4.7843	DFHFGVCIP	81.5373	65.5882	46.3134
renca_958	11	78348190	T	G	0/1	Unc119	ENSMUSG00000002058	ENSMUST00000002127	177-185	240	181	F/V	missense_variant	1616	4.7843	FHFGVCIPS	40.0206	14.6531	3.619
renca_959	11	78348190	T	G	0/1	Unc119	ENSMUSG00000002058	ENSMUST00000002127	178-186	240	181	F/V	missense_variant	1616	4.7843	HFGVCIPSS	79.8656	52.783	22.5868
renca_960	11	78348190	T	G	0/1	Unc119	ENSMUSG00000002058	ENSMUST00000002127	179-187	240	181	F/V	missense_variant	1616	4.7843	FGVCIPSSK	20.372	21.2172	11.1538
renca_961	11	78348190	T	G	0/1	Unc119	ENSMUSG00000002058	ENSMUST00000002127	180-188	240	181	F/V	missense_variant	1616	4.7843	GVCIPSSKN	96.2677	96.5436	91.2681
renca_962	11	78348190	T	G	0/1	Unc119	ENSMUSG00000002058	ENSMUST00000002127	181-189	240	181	F/V	missense_variant	1616	4.7843	VCIPSSKNT	90.4216	71.0187	61.8606
renca_963	11	83953289	T	G	0/1	Ddx52	ENSMUSG00000020677	ENSMUST00000049257	393-401	598	401	L/R	missense_variant	12062	26.2363	FVGSETGKR	86.6494	84.1463	82.7685
renca_964	11	83953289	T	G	0/1	Ddx52	ENSMUSG00000020677	ENSMUST00000049257	394-402	598	401	L/R	missense_variant	12062	26.2363	VGSETGKRL	6.2892	7.8288	16.5317
renca_965	11	83953289	T	G	0/1	Ddx52	ENSMUSG00000020677	ENSMUST00000049257	395-403	598	401	L/R	missense_variant	12062	26.2363	GSETGKRLA	63.9137	76.1515	59.7368
renca_966	11	83953289	T	G	0/1	Ddx52	ENSMUSG00000020677	ENSMUST00000049257	396-404	598	401	L/R	missense_variant	12062	26.2363	SETGKRLAM	33.6915	2.8936	26.0054
renca_967	11	83953289	T	G	0/1	Ddx52	ENSMUSG00000020677	ENSMUST00000049257	397-405	598	401	L/R	missense_variant	12062	26.2363	ETGKRLAMR	64.3869	61.6678	88.3407
renca_968	11	83953289	T	G	0/1	Ddx52	ENSMUSG00000020677	ENSMUST00000049257	398-406	598	401	L/R	missense_variant	12062	26.2363	TGKRLAMRE	31.6828	42.006	71.5133
renca_969	11	83953289	T	G	0/1	Ddx52	ENSMUSG00000020677	ENSMUST00000049257	399-407	598	401	L/R	missense_variant	12062	26.2363	GKRLAMREL	49.3646	22.4931	30.1114
renca_970	11	83953289	T	G	0/1	Ddx52	ENSMUSG00000020677	ENSMUST00000049257	400-408	598	401	L/R	missense_variant	12062	26.2363	KRLAMRELV	25.5979	6.3124	1.4023
renca_971	11	83953289	T	G	0/1	Ddx52	ENSMUSG00000020677	ENSMUST00000049257	401-409	598	401	L/R	missense_variant	12062	26.2363	RLAMRELVK	32.3676	34.1869	51.7349
renca_972	11	84364385	A	G	0/1	Acaca	ENSMUSG00000020532	ENSMUST00000020843	1915-1923	2345	1923	E/G	missense_variant	24847	10.547	KDPIDRIIG	47.1624	87.1721	95.3483
renca_973	11	84364385	A	G	0/1	Acaca	ENSMUSG00000020532	ENSMUST00000020843	1916-1924	2345	1923	E/G	missense_variant	24847	10.547	DPIDRIIGF	30.1372	1.8754	73.4449
renca_974	11	84364385	A	G	0/1	Acaca	ENSMUSG00000020532	ENSMUST00000020843	1917-1925	2345	1923	E/G	missense_variant	24847	10.547	PIDRIIGFV	52.1429	61.0218	55.4991
renca_975	11	84364385	A	G	0/1	Acaca	ENSMUSG00000020532	ENSMUST00000020843	1918-1926	2345	1923	E/G	missense_variant	24847	10.547	IDRIIGFVP	71.6106	40.0648	90.1937
renca_976	11	84364385	A	G	0/1	Acaca	ENSMUSG00000020532	ENSMUST00000020843	1919-1927	2345	1923	E/G	missense_variant	24847	10.547	DRIIGFVPT	80.7064	36.9784	49.0871
renca_977	11	84364385	A	G	0/1	Acaca	ENSMUSG00000020532	ENSMUST00000020843	1920-1928	2345	1923	E/G	missense_variant	24847	10.547	RIIGFVPTK	19.4433	20.192	25.6324
renca_978	11	84364385	A	G	0/1	Acaca	ENSMUSG00000020532	ENSMUST00000020843	1921-1929	2345	1923	E/G	missense_variant	24847	10.547	IIGFVPTKA	70.1374	47.7256	54.2815
renca_979	11	84364385	A	G	0/1	Acaca	ENSMUSG00000020532	ENSMUST00000020843	1922-1930	2345	1923	E/G	missense_variant	24847	10.547	IGFVPTKAP	22.5169	35.6738	39.0371
renca_980	11	84364385	A	G	0/1	Acaca	ENSMUSG00000020532	ENSMUST00000020843	1923-1931	2345	1923	E/G	missense_variant	24847	10.547	GFVPTKAPY	76.2659	30.9347	18.0896
renca_981	11	85053953	T	G	0/1	Usp32	ENSMUSG00000000804	ENSMUST00000108075	295-303	1604	303	N/T	missense_variant	10165	9.59256	ALLEVWKDT	89.2497	47.1884	51.9173
renca_982	11	85053953	T	G	0/1	Usp32	ENSMUSG00000000804	ENSMUST00000108075	296-304	1604	303	N/T	missense_variant	10165	9.59256	LLEVWKDTR	78.4583	62.8617	84.6793
renca_983	11	85053953	T	G	0/1	Usp32	ENSMUSG00000000804	ENSMUST00000108075	297-305	1604	303	N/T	missense_variant	10165	9.59256	LEVWKDTRT	90.5641	68.3784	74.7072
renca_984	11	85053953	T	G	0/1	Usp32	ENSMUSG00000000804	ENSMUST00000108075	298-306	1604	303	N/T	missense_variant	10165	9.59256	EVWKDTRTD	95.4776	81.4137	87.6436
renca_985	11	85053953	T	G	0/1	Usp32	ENSMUSG00000000804	ENSMUST00000108075	299-307	1604	303	N/T	missense_variant	10165	9.59256	VWKDTRTDD	96.5248	91.6438	82.3605
renca_986	11	85053953	T	G	0/1	Usp32	ENSMUSG00000000804	ENSMUST00000108075	300-308	1604	303	N/T	missense_variant	10165	9.59256	WKDTRTDDI	34.6679	38.735	37.5645
renca_987	11	85053953	T	G	0/1	Usp32	ENSMUSG00000000804	ENSMUST00000108075	301-309	1604	303	N/T	missense_variant	10165	9.59256	KDTRTDDIP	91.3925	96.8038	95.3665
renca_988	11	85053953	T	G	0/1	Usp32	ENSMUSG00000000804	ENSMUST00000108075	302-310	1604	303	N/T	missense_variant	10165	9.59256	DTRTDDIPE	95.7079	74.2487	95.2631
renca_989	11	85053953	T	G	0/1	Usp32	ENSMUSG00000000804	ENSMUST00000108075	303-311	1604	303	N/T	missense_variant	10165	9.59256	TRTDDIPEL	44.6961	18.493	34.2457
renca_990	11	86555214	T	G	0/1	Tubd1	ENSMUSG00000020513	ENSMUST00000020821	219-227	486	227	L/V	missense_variant	1296	4.53757	IKQISFRDV	47.8752	15.8265	27.7381
renca_991	11	86555214	T	G	0/1	Tubd1	ENSMUSG00000020513	ENSMUST00000020821	220-228	486	227	L/V	missense_variant	1296	4.53757	KQISFRDVN	47.5921	41.3988	14.4213
renca_992	11	86555214	T	G	0/1	Tubd1	ENSMUSG00000020513	ENSMUST00000020821	221-229	486	227	L/V	missense_variant	1296	4.53757	QISFRDVNQ	93.6401	86.8421	95.8497
renca_993	11	86555214	T	G	0/1	Tubd1	ENSMUSG00000020513	ENSMUST00000020821	222-230	486	227	L/V	missense_variant	1296	4.53757	ISFRDVNQV	5.8902	12.7015	5.51
renca_994	11	86555214	T	G	0/1	Tubd1	ENSMUSG00000020513	ENSMUST00000020821	223-231	486	227	L/V	missense_variant	1296	4.53757	SFRDVNQVL	21.8535	2.167	1.3749
renca_995	11	86555214	T	G	0/1	Tubd1	ENSMUSG00000020513	ENSMUST00000020821	224-232	486	227	L/V	missense_variant	1296	4.53757	FRDVNQVLA	34.2577	31.5505	25.2473
renca_996	11	86555214	T	G	0/1	Tubd1	ENSMUSG00000020513	ENSMUST00000020821	225-233	486	227	L/V	missense_variant	1296	4.53757	RDVNQVLAH	85.861	80.9124	95.5277
renca_997	11	86555214	T	G	0/1	Tubd1	ENSMUSG00000020513	ENSMUST00000020821	226-234	486	227	L/V	missense_variant	1296	4.53757	DVNQVLAHQ	95.4036	69.6304	88.1376
renca_998	11	86555214	T	G	0/1	Tubd1	ENSMUSG00000020513	ENSMUST00000020821	227-235	486	227	L/V	missense_variant	1296	4.53757	VNQVLAHQL	3.2978	1.0639	6.7345
renca_999	11	86555214	T	G	0/1	Tubd1	ENSMUSG00000020513	ENSMUST00000164931	2019-01-09	189	8	L/V	missense_variant	1296	4.53757	XQISFRDVN	75.1096	63.3813	24.1146
renca_1000	11	87761668	A	C	0/1	Tspoap1	ENSMUSG00000034156	ENSMUST00000039627	81-89	1846	89	Q/H	missense_variant	3069	2.34157	TGLPKLGQH	50.7305	39.8042	73.865
renca_1001	11	87761668	A	C	0/1	Tspoap1	ENSMUSG00000034156	ENSMUST00000039627	82-90	1846	89	Q/H	missense_variant	3069	2.34157	GLPKLGQHA	54.5261	73.3192	26.2308
renca_1002	11	87761668	A	C	0/1	Tspoap1	ENSMUSG00000034156	ENSMUST00000039627	83-91	1846	89	Q/H	missense_variant	3069	2.34157	LPKLGQHAE	90.3949	14.1892	92.2333
renca_1003	11	87761668	A	C	0/1	Tspoap1	ENSMUSG00000034156	ENSMUST00000039627	84-92	1846	89	Q/H	missense_variant	3069	2.34157	PKLGQHAES	97.3979	95.8802	92.719
renca_1004	11	87761668	A	C	0/1	Tspoap1	ENSMUSG00000034156	ENSMUST00000039627	85-93	1846	89	Q/H	missense_variant	3069	2.34157	KLGQHAESP	61.1369	86.32	53.6216
renca_1005	11	87761668	A	C	0/1	Tspoap1	ENSMUSG00000034156	ENSMUST00000039627	86-94	1846	89	Q/H	missense_variant	3069	2.34157	LGQHAESPG	29.1815	39.5891	44.5899
renca_1006	11	87761668	A	C	0/1	Tspoap1	ENSMUSG00000034156	ENSMUST00000039627	87-95	1846	89	Q/H	missense_variant	3069	2.34157	GQHAESPGY	64.244	54.2554	64.3915
renca_1007	11	87761668	A	C	0/1	Tspoap1	ENSMUSG00000034156	ENSMUST00000039627	88-96	1846	89	Q/H	missense_variant	3069	2.34157	QHAESPGYS	72.4794	50.2761	13.9672
renca_1008	11	87761668	A	C	0/1	Tspoap1	ENSMUSG00000034156	ENSMUST00000039627	89-97	1846	89	Q/H	missense_variant	3069	2.34157	HAESPGYSC	48.4029	22.4668	59.0502
renca_1009	11	94013696	C	G	0/1	Spag9	ENSMUSG00000020859	ENSMUST00000041956	118-126	1307	126	S/C	missense_variant	31197	20.1713	QTRVESLEC	49.9236	41.8112	70.3536
renca_1010	11	94013696	C	G	0/1	Spag9	ENSMUSG00000020859	ENSMUST00000041956	119-127	1307	126	S/C	missense_variant	31197	20.1713	TRVESLECQ	92.022	80.7407	61.7452
renca_1011	11	94013696	C	G	0/1	Spag9	ENSMUSG00000020859	ENSMUST00000041956	120-128	1307	126	S/C	missense_variant	31197	20.1713	RVESLECQT	77.2348	69.8092	64.104
renca_1012	11	94013696	C	G	0/1	Spag9	ENSMUSG00000020859	ENSMUST00000041956	121-129	1307	126	S/C	missense_variant	31197	20.1713	VESLECQTR	81.7094	59.9969	77.682
renca_1013	11	94013696	C	G	0/1	Spag9	ENSMUSG00000020859	ENSMUST00000041956	122-130	1307	126	S/C	missense_variant	31197	20.1713	ESLECQTRQ	83.1003	63.9466	73.4601
renca_1014	11	94013696	C	G	0/1	Spag9	ENSMUSG00000020859	ENSMUST00000041956	123-131	1307	126	S/C	missense_variant	31197	20.1713	SLECQTRQL	17.9463	12.76	11.649
renca_1015	11	94013696	C	G	0/1	Spag9	ENSMUSG00000020859	ENSMUST00000041956	124-132	1307	126	S/C	missense_variant	31197	20.1713	LECQTRQLE	93.6045	63.8378	82.9962
renca_1016	11	94013696	C	G	0/1	Spag9	ENSMUSG00000020859	ENSMUST00000041956	125-133	1307	126	S/C	missense_variant	31197	20.1713	ECQTRQLEL	31.0126	11.9494	61.7168
renca_1017	11	94013696	C	G	0/1	Spag9	ENSMUSG00000020859	ENSMUST00000041956	126-134	1307	126	S/C	missense_variant	31197	20.1713	CQTRQLELK	38.7307	63.9677	19.1215
renca_1018	11	96299390	T	A	0/1	Hoxb6	ENSMUSG00000000690	ENSMUST00000000704	64-72	224	72	C/S	missense_variant	1564	5.77143	GGYGRAAPS	18.5777	23.4148	19.3518
renca_1019	11	96299390	T	A	0/1	Hoxb6	ENSMUSG00000000690	ENSMUST00000000704	65-73	224	72	C/S	missense_variant	1564	5.77143	GYGRAAPSD	85.7918	91.5825	21.9772
renca_1020	11	96299390	T	A	0/1	Hoxb6	ENSMUSG00000000690	ENSMUST00000000704	66-74	224	72	C/S	missense_variant	1564	5.77143	YGRAAPSDY	25.4876	9.5702	39.4404
renca_1021	11	96299390	T	A	0/1	Hoxb6	ENSMUSG00000000690	ENSMUST00000000704	67-75	224	72	C/S	missense_variant	1564	5.77143	GRAAPSDYG	74.8077	80.2304	45.3747
renca_1022	11	96299390	T	A	0/1	Hoxb6	ENSMUSG00000000690	ENSMUST00000000704	68-76	224	72	C/S	missense_variant	1564	5.77143	RAAPSDYGP	44.8361	53.865	56.1388
renca_1023	11	96299390	T	A	0/1	Hoxb6	ENSMUSG00000000690	ENSMUST00000000704	69-77	224	72	C/S	missense_variant	1564	5.77143	AAPSDYGPA	9.4484	21.9334	15.3553
renca_1024	11	96299390	T	A	0/1	Hoxb6	ENSMUSG00000000690	ENSMUST00000000704	70-78	224	72	C/S	missense_variant	1564	5.77143	APSDYGPAP	86.397	16.2798	84.4744
renca_1025	11	96299390	T	A	0/1	Hoxb6	ENSMUSG00000000690	ENSMUST00000000704	71-79	224	72	C/S	missense_variant	1564	5.77143	PSDYGPAPA	58.9656	77.2986	71.9373
renca_1026	11	96299390	T	A	0/1	Hoxb6	ENSMUSG00000000690	ENSMUST00000000704	72-80	224	72	C/S	missense_variant	1564	5.77143	SDYGPAPAF	13.7049	2.4933	34.8225
renca_1027	11	100584586	T	G	0/1	Dnajc7	ENSMUSG00000014195	ENSMUST00000014339	391-399	494	399	K/N	missense_variant	9633	14.3564	NASEDEIKN	95.6265	92.9596	96.618
renca_1028	11	100584586	T	G	0/1	Dnajc7	ENSMUSG00000014195	ENSMUST00000014339	392-400	494	399	K/N	missense_variant	9633	14.3564	ASEDEIKNA	74.8249	89.9457	84.463
renca_1029	11	100584586	T	G	0/1	Dnajc7	ENSMUSG00000014195	ENSMUST00000014339	393-401	494	399	K/N	missense_variant	9633	14.3564	SEDEIKNAY	67.2736	26.8725	73.3118
renca_1030	11	100584586	T	G	0/1	Dnajc7	ENSMUSG00000014195	ENSMUST00000014339	394-402	494	399	K/N	missense_variant	9633	14.3564	EDEIKNAYR	89.0249	65.8347	96.3348
renca_1031	11	100584586	T	G	0/1	Dnajc7	ENSMUSG00000014195	ENSMUST00000014339	395-403	494	399	K/N	missense_variant	9633	14.3564	DEIKNAYRK	84.6742	35.7067	58.5995
renca_1032	11	100584586	T	G	0/1	Dnajc7	ENSMUSG00000014195	ENSMUST00000014339	396-404	494	399	K/N	missense_variant	9633	14.3564	EIKNAYRKR	95.978	74.6095	95.3966
renca_1033	11	100584586	T	G	0/1	Dnajc7	ENSMUSG00000014195	ENSMUST00000014339	397-405	494	399	K/N	missense_variant	9633	14.3564	IKNAYRKRA	85.2248	56.6312	61.9358
renca_1034	11	100584586	T	G	0/1	Dnajc7	ENSMUSG00000014195	ENSMUST00000014339	398-406	494	399	K/N	missense_variant	9633	14.3564	KNAYRKRAL	4.928	6.7265	12.3412
renca_1035	11	100584586	T	G	0/1	Dnajc7	ENSMUSG00000014195	ENSMUST00000014339	399-407	494	399	K/N	missense_variant	9633	14.3564	NAYRKRALM	3.4208	0.6548	6.3612
renca_1036	11	100770255	G	C	0/1	Ghdc	ENSMUSG00000017747	ENSMUST00000017891	20-28	532	28	A/G	missense_variant	2961	7.97171	LWQQRSRGG	74.3956	69.845	63.778
renca_1037	11	100770255	G	C	0/1	Ghdc	ENSMUSG00000017747	ENSMUST00000017891	21-29	532	28	A/G	missense_variant	2961	7.97171	WQQRSRGGR	76.1987	49.2107	37.2999
renca_1038	11	100770255	G	C	0/1	Ghdc	ENSMUSG00000017747	ENSMUST00000017891	22-30	532	28	A/G	missense_variant	2961	7.97171	QQRSRGGRP	89.4018	70.7343	73.7795
renca_1039	11	100770255	G	C	0/1	Ghdc	ENSMUSG00000017747	ENSMUST00000017891	23-31	532	28	A/G	missense_variant	2961	7.97171	QRSRGGRPC	84.1179	69.837	49.3775
renca_1040	11	100770255	G	C	0/1	Ghdc	ENSMUSG00000017747	ENSMUST00000017891	24-32	532	28	A/G	missense_variant	2961	7.97171	RSRGGRPCW	6.1861	10.7177	31.1014
renca_1041	11	100770255	G	C	0/1	Ghdc	ENSMUSG00000017747	ENSMUST00000017891	25-33	532	28	A/G	missense_variant	2961	7.97171	SRGGRPCWL	19.9374	13.1099	27.0377
renca_1042	11	100770255	G	C	0/1	Ghdc	ENSMUSG00000017747	ENSMUST00000017891	26-34	532	28	A/G	missense_variant	2961	7.97171	RGGRPCWLI	0.0802	6.8042	6.1886
renca_1043	11	100770255	G	C	0/1	Ghdc	ENSMUSG00000017747	ENSMUST00000017891	27-35	532	28	A/G	missense_variant	2961	7.97171	GGRPCWLIS	24.8305	22.0029	46.8117
renca_1044	11	100770255	G	C	0/1	Ghdc	ENSMUSG00000017747	ENSMUST00000017891	28-36	532	28	A/G	missense_variant	2961	7.97171	GRPCWLISL	4.8812	13.8321	11.1194
renca_1045	11	101076742	C	T	0/1	Naglu	ENSMUSG00000001751	ENSMUST00000001802	498-506	739	506	A/V	missense_variant	4412	12.0301	SVYNCSGEV	16.0304	6.8353	4.2679
renca_1046	11	101076742	C	T	0/1	Naglu	ENSMUSG00000001751	ENSMUST00000001802	499-507	739	506	A/V	missense_variant	4412	12.0301	VYNCSGEVC	43.7457	33.8698	2.5271
renca_1047	11	101076742	C	T	0/1	Naglu	ENSMUSG00000001751	ENSMUST00000001802	500-508	739	506	A/V	missense_variant	4412	12.0301	YNCSGEVCS	75.8062	64.3258	56.0768
renca_1048	11	101076742	C	T	0/1	Naglu	ENSMUSG00000001751	ENSMUST00000001802	501-509	739	506	A/V	missense_variant	4412	12.0301	NCSGEVCSG	90.2078	93.85	94.4774
renca_1049	11	101076742	C	T	0/1	Naglu	ENSMUSG00000001751	ENSMUST00000001802	502-510	739	506	A/V	missense_variant	4412	12.0301	CSGEVCSGH	56.0238	67.8577	65.4217
renca_1050	11	101076742	C	T	0/1	Naglu	ENSMUSG00000001751	ENSMUST00000001802	503-511	739	506	A/V	missense_variant	4412	12.0301	SGEVCSGHN	45.6733	69.6701	73.3726
renca_1051	11	101076742	C	T	0/1	Naglu	ENSMUSG00000001751	ENSMUST00000001802	504-512	739	506	A/V	missense_variant	4412	12.0301	GEVCSGHNR	95.3426	51.0011	61.9709
renca_1052	11	101076742	C	T	0/1	Naglu	ENSMUSG00000001751	ENSMUST00000001802	505-513	739	506	A/V	missense_variant	4412	12.0301	EVCSGHNRS	94.139	78.8091	76.1716
renca_1053	11	101076742	C	T	0/1	Naglu	ENSMUSG00000001751	ENSMUST00000001802	506-514	739	506	A/V	missense_variant	4412	12.0301	VCSGHNRSP	89.4053	92.372	91.308
renca_1054	11	101085871	T	G	0/1	Coasy	ENSMUSG00000001755	ENSMUST00000001806	481-489	563	489	V/G	missense_variant	8738	22.0888	MVHEVWTVG	44.5599	8.4032	24.6359
renca_1055	11	101085871	T	G	0/1	Coasy	ENSMUSG00000001755	ENSMUST00000001806	482-490	563	489	V/G	missense_variant	8738	22.0888	VHEVWTVGI	12.3285	6.4724	3.2768
renca_1056	11	101085871	T	G	0/1	Coasy	ENSMUSG00000001755	ENSMUST00000001806	483-491	563	489	V/G	missense_variant	8738	22.0888	HEVWTVGIP	85.2282	51.9883	51.3757
renca_1057	11	101085871	T	G	0/1	Coasy	ENSMUSG00000001755	ENSMUST00000001806	484-492	563	489	V/G	missense_variant	8738	22.0888	EVWTVGIPE	90.9056	42.2749	86.8624
renca_1058	11	101085871	T	G	0/1	Coasy	ENSMUSG00000001755	ENSMUST00000001806	485-493	563	489	V/G	missense_variant	8738	22.0888	VWTVGIPET	75.9265	61.9698	21.5212
renca_1059	11	101085871	T	G	0/1	Coasy	ENSMUSG00000001755	ENSMUST00000001806	486-494	563	489	V/G	missense_variant	8738	22.0888	WTVGIPETE	70.158	72.3048	60.6169
renca_1060	11	101085871	T	G	0/1	Coasy	ENSMUSG00000001755	ENSMUST00000001806	487-495	563	489	V/G	missense_variant	8738	22.0888	TVGIPETEA	84.1508	52.9866	65.1205
renca_1061	11	101085871	T	G	0/1	Coasy	ENSMUSG00000001755	ENSMUST00000001806	488-496	563	489	V/G	missense_variant	8738	22.0888	VGIPETEAV	3.6503	7.8911	8.2028
renca_1062	11	101085871	T	G	0/1	Coasy	ENSMUSG00000001755	ENSMUST00000001806	489-497	563	489	V/G	missense_variant	8738	22.0888	GIPETEAVR	70.1408	93.0173	83.9165
renca_1063	11	101275047	G	C	0/1	Wnk4	ENSMUSG00000035112	ENSMUST00000103108	792-800	1222	800	G/A	missense_variant	4298	7.50958	FSTSPSSPA	21.5833	21.9609	5.9556
renca_1064	11	101275047	G	C	0/1	Wnk4	ENSMUSG00000035112	ENSMUST00000103108	793-801	1222	800	G/A	missense_variant	4298	7.50958	STSPSSPAT	45.1107	35.1674	31.9472
renca_1065	11	101275047	G	C	0/1	Wnk4	ENSMUSG00000035112	ENSMUST00000103108	794-802	1222	800	G/A	missense_variant	4298	7.50958	TSPSSPATP	7.6587	61.1025	39.252
renca_1066	11	101275047	G	C	0/1	Wnk4	ENSMUSG00000035112	ENSMUST00000103108	795-803	1222	800	G/A	missense_variant	4298	7.50958	SPSSPATPL	17.1127	0.1253	6.8622
renca_1067	11	101275047	G	C	0/1	Wnk4	ENSMUSG00000035112	ENSMUST00000103108	796-804	1222	800	G/A	missense_variant	4298	7.50958	PSSPATPLS	49.1441	72.8905	79.9864
renca_1068	11	101275047	G	C	0/1	Wnk4	ENSMUSG00000035112	ENSMUST00000103108	797-805	1222	800	G/A	missense_variant	4298	7.50958	SSPATPLSP	7.0663	57.2812	37.8059
renca_1069	11	101275047	G	C	0/1	Wnk4	ENSMUSG00000035112	ENSMUST00000103108	798-806	1222	800	G/A	missense_variant	4298	7.50958	SPATPLSPG	49.3297	6.2753	28.7723
renca_1070	11	101275047	G	C	0/1	Wnk4	ENSMUSG00000035112	ENSMUST00000103108	799-807	1222	800	G/A	missense_variant	4298	7.50958	PATPLSPGA	86.2171	67.0429	74.6331
renca_1071	11	101275047	G	C	0/1	Wnk4	ENSMUSG00000035112	ENSMUST00000103108	800-808	1222	800	G/A	missense_variant	4298	7.50958	ATPLSPGAP	28.8826	82.9584	57.3866
renca_1072	11	101463049	G	A	0/1	Vat1	ENSMUSG00000034993	ENSMUST00000040430	157-165	406	165	A/V	missense_variant	32334	84.7219	QEEVTVPSV	69.5634	26.9873	41.5025
renca_1073	11	101463049	G	A	0/1	Vat1	ENSMUSG00000034993	ENSMUST00000040430	158-166	406	165	A/V	missense_variant	32334	84.7219	EEVTVPSVQ	97.1692	77.2504	90.2398
renca_1074	11	101463049	G	A	0/1	Vat1	ENSMUSG00000034993	ENSMUST00000040430	159-167	406	165	A/V	missense_variant	32334	84.7219	EVTVPSVQT	95.1001	76.2785	86.8514
renca_1075	11	101463049	G	A	0/1	Vat1	ENSMUSG00000034993	ENSMUST00000040430	160-168	406	165	A/V	missense_variant	32334	84.7219	VTVPSVQTF	1.9591	5.3018	9.4572
renca_1076	11	101463049	G	A	0/1	Vat1	ENSMUSG00000034993	ENSMUST00000040430	161-169	406	165	A/V	missense_variant	32334	84.7219	TVPSVQTFL	0.6637	2.9806	2.9678
renca_1077	11	101463049	G	A	0/1	Vat1	ENSMUSG00000034993	ENSMUST00000040430	162-170	406	165	A/V	missense_variant	32334	84.7219	VPSVQTFLM	9.1312	0.0202	26.378
renca_1078	11	101463049	G	A	0/1	Vat1	ENSMUSG00000034993	ENSMUST00000040430	163-171	406	165	A/V	missense_variant	32334	84.7219	PSVQTFLMP	49.4367	86.5581	62.9823
renca_1079	11	101463049	G	A	0/1	Vat1	ENSMUSG00000034993	ENSMUST00000040430	164-172	406	165	A/V	missense_variant	32334	84.7219	SVQTFLMPE	30.5511	17.2633	38.9008
renca_1080	11	101463049	G	A	0/1	Vat1	ENSMUSG00000034993	ENSMUST00000040430	165-173	406	165	A/V	missense_variant	32334	84.7219	VQTFLMPEA	45.98	29.6787	19.7732
renca_1081	11	101667061	G	A	0/1	Arl4d	ENSMUSG00000034936	ENSMUST00000039388	130-138	201	138	D/N	missense_variant	5019	26.3207	VLVLANKQN	95.4622	93.7419	83.463
renca_1082	11	101667061	G	A	0/1	Arl4d	ENSMUSG00000034936	ENSMUST00000039388	131-139	201	138	D/N	missense_variant	5019	26.3207	LVLANKQNQ	93.1473	56.7812	65.3286
renca_1083	11	101667061	G	A	0/1	Arl4d	ENSMUSG00000034936	ENSMUST00000039388	132-140	201	138	D/N	missense_variant	5019	26.3207	VLANKQNQP	71.0543	86.015	58.2411
renca_1084	11	101667061	G	A	0/1	Arl4d	ENSMUSG00000034936	ENSMUST00000039388	133-141	201	138	D/N	missense_variant	5019	26.3207	LANKQNQPG	56.2196	42.9203	55.0544
renca_1085	11	101667061	G	A	0/1	Arl4d	ENSMUSG00000034936	ENSMUST00000039388	134-142	201	138	D/N	missense_variant	5019	26.3207	ANKQNQPGA	61.8929	41.1445	41.6465
renca_1086	11	101667061	G	A	0/1	Arl4d	ENSMUSG00000034936	ENSMUST00000039388	135-143	201	138	D/N	missense_variant	5019	26.3207	NKQNQPGAL	59.5159	17.8717	40.1095
renca_1087	11	101667061	G	A	0/1	Arl4d	ENSMUSG00000034936	ENSMUST00000039388	136-144	201	138	D/N	missense_variant	5019	26.3207	KQNQPGALS	62.494	49.8347	25.7676
renca_1088	11	101667061	G	A	0/1	Arl4d	ENSMUSG00000034936	ENSMUST00000039388	137-145	201	138	D/N	missense_variant	5019	26.3207	QNQPGALSA	52.0643	25.1729	38.844
renca_1089	11	101667061	G	A	0/1	Arl4d	ENSMUSG00000034936	ENSMUST00000039388	138-146	201	138	D/N	missense_variant	5019	26.3207	NQPGALSAA	36.3956	32.7315	10.7776
renca_1090	11	102403822	C	G	0/1	Slc25a39	ENSMUSG00000018677	ENSMUST00000018821	276-284	359	284	Q/H	missense_variant	57397	150.938	FDVVKTQRH	89.8548	82.3171	93.8518
renca_1091	11	102403822	C	G	0/1	Slc25a39	ENSMUSG00000018677	ENSMUST00000018821	277-285	359	284	Q/H	missense_variant	57397	150.938	DVVKTQRHM	60.6548	18.5719	30.994
renca_1092	11	102403822	C	G	0/1	Slc25a39	ENSMUSG00000018677	ENSMUST00000018821	278-286	359	284	Q/H	missense_variant	57397	150.938	VVKTQRHMS	77.8076	43.4918	74.1369
renca_1093	11	102403822	C	G	0/1	Slc25a39	ENSMUSG00000018677	ENSMUST00000018821	279-287	359	284	Q/H	missense_variant	57397	150.938	VKTQRHMSL	13.9965	6.2378	20.7793
renca_1094	11	102403822	C	G	0/1	Slc25a39	ENSMUSG00000018677	ENSMUST00000018821	280-288	359	284	Q/H	missense_variant	57397	150.938	KTQRHMSLG	8.4612	32.046	28.2733
renca_1095	11	102403822	C	G	0/1	Slc25a39	ENSMUSG00000018677	ENSMUST00000018821	281-289	359	284	Q/H	missense_variant	57397	150.938	TQRHMSLGA	59.4418	26.7647	24.8693
renca_1096	11	102403822	C	G	0/1	Slc25a39	ENSMUSG00000018677	ENSMUST00000018821	282-290	359	284	Q/H	missense_variant	57397	150.938	QRHMSLGAV	50.1734	22.7892	8.4869
renca_1097	11	102403822	C	G	0/1	Slc25a39	ENSMUSG00000018677	ENSMUST00000018821	283-291	359	284	Q/H	missense_variant	57397	150.938	RHMSLGAVE	42.403	14.3917	4.2269
renca_1098	11	102403822	C	G	0/1	Slc25a39	ENSMUSG00000018677	ENSMUST00000018821	284-292	359	284	Q/H	missense_variant	57397	150.938	HMSLGAVEA	57.7593	34.304	20.2827
renca_1099	11	103171406	G	C	0/1	Fmnl1	ENSMUSG00000055805	ENSMUST00000042286	24-32	1094	32	A/P	missense_variant	3826	5.67518	VPKQPMPAP	80.0037	14.3029	77.6665
renca_1100	11	103171406	G	C	0/1	Fmnl1	ENSMUSG00000055805	ENSMUST00000042286	25-33	1094	32	A/P	missense_variant	3826	5.67518	PKQPMPAPG	96.192	93.3778	87.2594
renca_1101	11	103171406	G	C	0/1	Fmnl1	ENSMUSG00000055805	ENSMUST00000042286	26-34	1094	32	A/P	missense_variant	3826	5.67518	KQPMPAPGE	31.6759	70.2122	62.9071
renca_1102	11	103171406	G	C	0/1	Fmnl1	ENSMUSG00000055805	ENSMUST00000042286	27-35	1094	32	A/P	missense_variant	3826	5.67518	QPMPAPGEL	31.5575	0.064	12.3468
renca_1103	11	103171406	G	C	0/1	Fmnl1	ENSMUSG00000055805	ENSMUST00000042286	28-36	1094	32	A/P	missense_variant	3826	5.67518	PMPAPGELE	53.62	92.7902	87.4369
renca_1104	11	103171406	G	C	0/1	Fmnl1	ENSMUSG00000055805	ENSMUST00000042286	29-37	1094	32	A/P	missense_variant	3826	5.67518	MPAPGELEE	84.0996	11.5857	87.9473
renca_1105	11	103171406	G	C	0/1	Fmnl1	ENSMUSG00000055805	ENSMUST00000042286	30-38	1094	32	A/P	missense_variant	3826	5.67518	PAPGELEER	58.246	94.9856	93.0941
renca_1106	11	103171406	G	C	0/1	Fmnl1	ENSMUSG00000055805	ENSMUST00000042286	31-39	1094	32	A/P	missense_variant	3826	5.67518	APGELEERF	30.5383	1.0614	62.8017
renca_1107	11	103171406	G	C	0/1	Fmnl1	ENSMUSG00000055805	ENSMUST00000042286	32-40	1094	32	A/P	missense_variant	3826	5.67518	PGELEERFT	89.4917	97.1868	97.595
renca_1108	11	103225065	T	C	0/1	Map3k14	ENSMUSG00000020941	ENSMUST00000021324	788-796	942	796	D/G	missense_variant	1816	2.00938	QILSCLSIG	73.513	49.4053	33.8304
renca_1109	11	103225065	T	C	0/1	Map3k14	ENSMUSG00000020941	ENSMUST00000021324	789-797	942	796	D/G	missense_variant	1816	2.00938	ILSCLSIGS	69.1494	65.942	55.555
renca_1110	11	103225065	T	C	0/1	Map3k14	ENSMUSG00000020941	ENSMUST00000021324	790-798	942	796	D/G	missense_variant	1816	2.00938	LSCLSIGSL	5.0996	11.9727	9.4519
renca_1111	11	103225065	T	C	0/1	Map3k14	ENSMUSG00000020941	ENSMUST00000021324	791-799	942	796	D/G	missense_variant	1816	2.00938	SCLSIGSLS	79.2539	39.8571	28.8953
renca_1112	11	103225065	T	C	0/1	Map3k14	ENSMUSG00000020941	ENSMUST00000021324	792-800	942	796	D/G	missense_variant	1816	2.00938	CLSIGSLSL	11.873	12.7832	15.1206
renca_1113	11	103225065	T	C	0/1	Map3k14	ENSMUSG00000020941	ENSMUST00000021324	793-801	942	796	D/G	missense_variant	1816	2.00938	LSIGSLSLS	28.0328	42.9064	17.8662
renca_1114	11	103225065	T	C	0/1	Map3k14	ENSMUSG00000020941	ENSMUST00000021324	794-802	942	796	D/G	missense_variant	1816	2.00938	SIGSLSLSD	76.8423	70.2717	67.8897
renca_1115	11	103225065	T	C	0/1	Map3k14	ENSMUSG00000020941	ENSMUST00000021324	795-803	942	796	D/G	missense_variant	1816	2.00938	IGSLSLSDD	40.8796	75.4291	79.1208
renca_1116	11	103225065	T	C	0/1	Map3k14	ENSMUSG00000020941	ENSMUST00000021324	796-804	942	796	D/G	missense_variant	1816	2.00938	GSLSLSDDS	68.8551	79.838	41.4935
renca_1117	11	103242356	T	G	0/1	Map3k14	ENSMUSG00000020941	ENSMUST00000021324	2019-01-09	942	5	E/D	missense_variant	1816	2.00938	MAVMDVACP	58.1508	52.5627	43.8571
renca_1118	11	103242356	T	G	0/1	Map3k14	ENSMUSG00000020941	ENSMUST00000021324	2019-02-10	942	5	E/D	missense_variant	1816	2.00938	AVMDVACPG	47.0436	20.8505	14.3769
renca_1119	11	103242356	T	G	0/1	Map3k14	ENSMUSG00000020941	ENSMUST00000021324	2019-03-11	942	5	E/D	missense_variant	1816	2.00938	VMDVACPGT	43.0156	54.2052	39.29
renca_1120	11	103242356	T	G	0/1	Map3k14	ENSMUSG00000020941	ENSMUST00000021324	2019-04-12	942	5	E/D	missense_variant	1816	2.00938	MDVACPGTP	77.8501	54.9442	56.2477
renca_1121	11	103242356	T	G	0/1	Map3k14	ENSMUSG00000020941	ENSMUST00000021324	2019-05-13	942	5	E/D	missense_variant	1816	2.00938	DVACPGTPG	82.1523	53.8455	57.3805
renca_1122	11	106247928	G	C	0/1	Ddx42	ENSMUSG00000020705	ENSMUST00000021046	843-851	929	851	G/A	missense_variant	13951	23.9144	ESGSRHTDA	58.8836	43.0471	69.1694
renca_1123	11	106247928	G	C	0/1	Ddx42	ENSMUSG00000020705	ENSMUST00000021046	844-852	929	851	G/A	missense_variant	13951	23.9144	SGSRHTDAH	26.5054	52.9922	72.9753
renca_1124	11	106247928	G	C	0/1	Ddx42	ENSMUSG00000020705	ENSMUST00000021046	845-853	929	851	G/A	missense_variant	13951	23.9144	GSRHTDAHR	79.0488	72.5891	68.8007
renca_1125	11	106247928	G	C	0/1	Ddx42	ENSMUSG00000020705	ENSMUST00000021046	846-854	929	851	G/A	missense_variant	13951	23.9144	SRHTDAHRH	91.9181	70.1952	75.7029
renca_1126	11	106247928	G	C	0/1	Ddx42	ENSMUSG00000020705	ENSMUST00000021046	847-855	929	851	G/A	missense_variant	13951	23.9144	RHTDAHRHG	64.5	52.8221	24.1276
renca_1127	11	106247928	G	C	0/1	Ddx42	ENSMUSG00000020705	ENSMUST00000021046	848-856	929	851	G/A	missense_variant	13951	23.9144	HTDAHRHGE	50.846	43.1455	74.8422
renca_1128	11	106247928	G	C	0/1	Ddx42	ENSMUSG00000020705	ENSMUST00000021046	849-857	929	851	G/A	missense_variant	13951	23.9144	TDAHRHGET	57.3598	52.1835	85.8617
renca_1129	11	106247928	G	C	0/1	Ddx42	ENSMUSG00000020705	ENSMUST00000021046	850-858	929	851	G/A	missense_variant	13951	23.9144	DAHRHGETR	61.3631	34.5941	58.6298
renca_1130	11	106247928	G	C	0/1	Ddx42	ENSMUSG00000020705	ENSMUST00000021046	851-859	929	851	G/A	missense_variant	13951	23.9144	AHRHGETRH	95.118	81.6079	63.4888
renca_1131	11	106255609	A	C	0/1	Ftsj3	ENSMUSG00000020706	ENSMUST00000021048	2019-07-15	838	15	F/V	missense_variant	16972	28.225	VGKSRRDKV	9.8402	10.3938	20.0468
renca_1132	11	106255609	A	C	0/1	Ftsj3	ENSMUSG00000020706	ENSMUST00000021048	2019-08-16	838	15	F/V	missense_variant	16972	28.225	GKSRRDKVY	91.1787	95.0074	94.5942
renca_1133	11	106255609	A	C	0/1	Ftsj3	ENSMUSG00000020706	ENSMUST00000021048	2019-09-17	838	15	F/V	missense_variant	16972	28.225	KSRRDKVYH	64.3274	49.8907	75.4996
renca_1134	11	106255609	A	C	0/1	Ftsj3	ENSMUSG00000020706	ENSMUST00000021048	2019-10-18	838	15	F/V	missense_variant	16972	28.225	SRRDKVYHL	28.2478	4.3512	16.2336
renca_1135	11	106255609	A	C	0/1	Ftsj3	ENSMUSG00000020706	ENSMUST00000021048	2019-11-19	838	15	F/V	missense_variant	16972	28.225	RRDKVYHLA	35.8429	28.9748	34.7466
renca_1136	11	106255609	A	C	0/1	Ftsj3	ENSMUSG00000020706	ENSMUST00000021048	2019-12-20	838	15	F/V	missense_variant	16972	28.225	RDKVYHLAK	33.7095	34.9107	81.0626
renca_1137	11	106255609	A	C	0/1	Ftsj3	ENSMUSG00000020706	ENSMUST00000021048	13-21	838	15	F/V	missense_variant	16972	28.225	DKVYHLAKE	95.2278	92.354	94.3191
renca_1138	11	106255609	A	C	0/1	Ftsj3	ENSMUSG00000020706	ENSMUST00000021048	14-22	838	15	F/V	missense_variant	16972	28.225	KVYHLAKET	64.7024	43.4775	34.5043
renca_1139	11	106255609	A	C	0/1	Ftsj3	ENSMUSG00000020706	ENSMUST00000021048	15-23	838	15	F/V	missense_variant	16972	28.225	VYHLAKETG	51.81	29.6228	2.3583
renca_1140	11	107072857	T	G	0/1	Bptf	ENSMUSG00000040481	ENSMUST00000057892	1714-1722	2921	1722	K/T	missense_variant	18582	9.56417	GTALPSYRT	50.89	64.4347	61.543
renca_1141	11	107072857	T	G	0/1	Bptf	ENSMUSG00000040481	ENSMUST00000057892	1715-1723	2921	1722	K/T	missense_variant	18582	9.56417	TALPSYRTF	1.1742	0.3716	4.0718
renca_1142	11	107072857	T	G	0/1	Bptf	ENSMUSG00000040481	ENSMUST00000057892	1716-1724	2921	1722	K/T	missense_variant	18582	9.56417	ALPSYRTFV	2.3206	9.3105	3.2336
renca_1143	11	107072857	T	G	0/1	Bptf	ENSMUSG00000040481	ENSMUST00000057892	1717-1725	2921	1722	K/T	missense_variant	18582	9.56417	LPSYRTFVT	36.9474	2.3031	56.9041
renca_1144	11	107072857	T	G	0/1	Bptf	ENSMUSG00000040481	ENSMUST00000057892	1718-1726	2921	1722	K/T	missense_variant	18582	9.56417	PSYRTFVTK	13.5592	35.9828	35.5952
renca_1145	11	107072857	T	G	0/1	Bptf	ENSMUSG00000040481	ENSMUST00000057892	1719-1727	2921	1722	K/T	missense_variant	18582	9.56417	SYRTFVTKS	59.8307	23.9598	1.428
renca_1146	11	107072857	T	G	0/1	Bptf	ENSMUSG00000040481	ENSMUST00000057892	1720-1728	2921	1722	K/T	missense_variant	18582	9.56417	YRTFVTKSS	87.1266	59.225	41.3756
renca_1147	11	107072857	T	G	0/1	Bptf	ENSMUSG00000040481	ENSMUST00000057892	1721-1729	2921	1722	K/T	missense_variant	18582	9.56417	RTFVTKSSK	22.4112	18.7614	14.9136
renca_1148	11	107072857	T	G	0/1	Bptf	ENSMUSG00000040481	ENSMUST00000057892	1722-1730	2921	1722	K/T	missense_variant	18582	9.56417	TFVTKSSKK	76.4958	53.0954	20.9029
renca_1149	11	116223770	G	C	0/1	Evpl	ENSMUSG00000034282	ENSMUST00000037007	1023-1031	2035	1031	S/R	missense_variant	1664	1.88907	IERDPGLDR	96.9333	52.8305	95.8698
renca_1150	11	116223770	G	C	0/1	Evpl	ENSMUSG00000034282	ENSMUST00000037007	1024-1032	2035	1031	S/R	missense_variant	1664	1.88907	ERDPGLDRQ	91.921	95.0074	95.3746
renca_1151	11	116223770	G	C	0/1	Evpl	ENSMUSG00000034282	ENSMUST00000037007	1025-1033	2035	1031	S/R	missense_variant	1664	1.88907	RDPGLDRQV	33.3854	52.7105	68.368
renca_1152	11	116223770	G	C	0/1	Evpl	ENSMUSG00000034282	ENSMUST00000037007	1026-1034	2035	1031	S/R	missense_variant	1664	1.88907	DPGLDRQVT	95.1806	56.5938	95.7693
renca_1153	11	116223770	G	C	0/1	Evpl	ENSMUSG00000034282	ENSMUST00000037007	1027-1035	2035	1031	S/R	missense_variant	1664	1.88907	PGLDRQVTQ	74.1174	81.2376	95.0541
renca_1154	11	116223770	G	C	0/1	Evpl	ENSMUSG00000034282	ENSMUST00000037007	1028-1036	2035	1031	S/R	missense_variant	1664	1.88907	GLDRQVTQL	21.6452	29.6535	13.0414
renca_1155	11	116223770	G	C	0/1	Evpl	ENSMUSG00000034282	ENSMUST00000037007	1029-1037	2035	1031	S/R	missense_variant	1664	1.88907	LDRQVTQLH	90.5077	66.2361	96.285
renca_1156	11	116223770	G	C	0/1	Evpl	ENSMUSG00000034282	ENSMUST00000037007	1030-1038	2035	1031	S/R	missense_variant	1664	1.88907	DRQVTQLHS	94.1894	65.3935	78.2146
renca_1157	11	116223770	G	C	0/1	Evpl	ENSMUSG00000034282	ENSMUST00000037007	1031-1039	2035	1031	S/R	missense_variant	1664	1.88907	RQVTQLHSE	60.2857	52.9113	25.6181
renca_1158	11	116543874	T	G	0/1	Ube2o	ENSMUSG00000020802	ENSMUST00000082152	579-587	1288	587	D/A	missense_variant	7851	10.7602	FCPGDFVVA	29.5953	58.1406	59.9123
renca_1159	11	116543874	T	G	0/1	Ube2o	ENSMUSG00000020802	ENSMUST00000082152	580-588	1288	587	D/A	missense_variant	7851	10.7602	CPGDFVVAK	51.0194	8.0294	71.5266
renca_1160	11	116543874	T	G	0/1	Ube2o	ENSMUSG00000020802	ENSMUST00000082152	581-589	1288	587	D/A	missense_variant	7851	10.7602	PGDFVVAKR	61.1637	83.0488	93.0833
renca_1161	11	116543874	T	G	0/1	Ube2o	ENSMUSG00000020802	ENSMUST00000082152	582-590	1288	587	D/A	missense_variant	7851	10.7602	GDFVVAKRV	57.6138	30.5659	42.5285
renca_1162	11	116543874	T	G	0/1	Ube2o	ENSMUSG00000020802	ENSMUST00000082152	583-591	1288	587	D/A	missense_variant	7851	10.7602	DFVVAKRVQ	96.664	75.0788	79.9845
renca_1163	11	116543874	T	G	0/1	Ube2o	ENSMUSG00000020802	ENSMUST00000082152	584-592	1288	587	D/A	missense_variant	7851	10.7602	FVVAKRVQS	69.4728	40.1349	33.9719
renca_1164	11	116543874	T	G	0/1	Ube2o	ENSMUSG00000020802	ENSMUST00000082152	585-593	1288	587	D/A	missense_variant	7851	10.7602	VVAKRVQSC	20.9075	29.034	32.8632
renca_1165	11	116543874	T	G	0/1	Ube2o	ENSMUSG00000020802	ENSMUST00000082152	586-594	1288	587	D/A	missense_variant	7851	10.7602	VAKRVQSCP	49.4279	53.9598	49.0404
renca_1166	11	116543874	T	G	0/1	Ube2o	ENSMUSG00000020802	ENSMUST00000082152	587-595	1288	587	D/A	missense_variant	7851	10.7602	AKRVQSCPD	90.7512	85.447	80.6338
renca_1167	11	117778773	A	C	0/1	Tmc6	ENSMUSG00000025572	ENSMUST00000026659	59-67	810	67	L/R	missense_variant	2194	3.88683	RGDQTLPGR	29.9888	57.0219	75.8675
renca_1168	11	117778773	A	C	0/1	Tmc6	ENSMUSG00000025572	ENSMUST00000026659	60-68	810	67	L/R	missense_variant	2194	3.88683	GDQTLPGRE	95.5834	95.5766	96.8965
renca_1169	11	117778773	A	C	0/1	Tmc6	ENSMUSG00000025572	ENSMUST00000026659	61-69	810	67	L/R	missense_variant	2194	3.88683	DQTLPGREG	93.0879	65.9022	76.8823
renca_1170	11	117778773	A	C	0/1	Tmc6	ENSMUSG00000025572	ENSMUST00000026659	62-70	810	67	L/R	missense_variant	2194	3.88683	QTLPGREGA	68.8745	36.659	37.8375
renca_1171	11	117778773	A	C	0/1	Tmc6	ENSMUSG00000025572	ENSMUST00000026659	63-71	810	67	L/R	missense_variant	2194	3.88683	TLPGREGAP	60.6845	92.7217	75.1859
renca_1172	11	117778773	A	C	0/1	Tmc6	ENSMUSG00000025572	ENSMUST00000026659	64-72	810	67	L/R	missense_variant	2194	3.88683	LPGREGAPA	62.3155	7.223	51.8365
renca_1173	11	117778773	A	C	0/1	Tmc6	ENSMUSG00000025572	ENSMUST00000026659	65-73	810	67	L/R	missense_variant	2194	3.88683	PGREGAPAL	15.4975	10.681	31.9486
renca_1174	11	117778773	A	C	0/1	Tmc6	ENSMUSG00000025572	ENSMUST00000026659	66-74	810	67	L/R	missense_variant	2194	3.88683	GREGAPALS	95.4874	91.5573	79.849
renca_1175	11	117778773	A	C	0/1	Tmc6	ENSMUSG00000025572	ENSMUST00000026659	67-75	810	67	L/R	missense_variant	2194	3.88683	REGAPALSS	85.6604	56.6437	80.611
renca_1176	11	117809739	G	C	0/1	Syngr2	ENSMUSG00000048277	ENSMUST00000026649	2019-04-12	224	12	G/A	missense_variant	11719	47.8229	GAYGAANAA	42.8882	16.7532	9.9953
renca_1177	11	117809739	G	C	0/1	Syngr2	ENSMUSG00000048277	ENSMUST00000026649	2019-05-13	224	12	G/A	missense_variant	11719	47.8229	AYGAANAAG	70.2885	50.633	2.9194
renca_1178	11	117809739	G	C	0/1	Syngr2	ENSMUSG00000048277	ENSMUST00000026649	2019-06-14	224	12	G/A	missense_variant	11719	47.8229	YGAANAAGS	18.6891	26.9637	15.9344
renca_1179	11	117809739	G	C	0/1	Syngr2	ENSMUSG00000048277	ENSMUST00000026649	2019-07-15	224	12	G/A	missense_variant	11719	47.8229	GAANAAGSF	10.3142	6.1828	10.8451
renca_1180	11	117809739	G	C	0/1	Syngr2	ENSMUSG00000048277	ENSMUST00000026649	2019-08-16	224	12	G/A	missense_variant	11719	47.8229	AANAAGSFD	58.6587	40.5288	33.2726
renca_1181	11	117809739	G	C	0/1	Syngr2	ENSMUSG00000048277	ENSMUST00000026649	2019-09-17	224	12	G/A	missense_variant	11719	47.8229	ANAAGSFDL	8.2761	3.0509	10.8473
renca_1182	11	117809739	G	C	0/1	Syngr2	ENSMUSG00000048277	ENSMUST00000026649	2019-10-18	224	12	G/A	missense_variant	11719	47.8229	NAAGSFDLR	28.8448	24.7272	28.1522
renca_1183	11	117809739	G	C	0/1	Syngr2	ENSMUSG00000048277	ENSMUST00000026649	2019-11-19	224	12	G/A	missense_variant	11719	47.8229	AAGSFDLRR	47.0376	43.7459	72.2909
renca_1184	11	117809739	G	C	0/1	Syngr2	ENSMUSG00000048277	ENSMUST00000026649	2019-12-20	224	12	G/A	missense_variant	11719	47.8229	AGSFDLRRF	2.8584	17.0779	41.998
renca_1185	11	119081128	C	T	0/1	Cbx4	ENSMUSG00000039989	ENSMUST00000026665	466-474	551	474	V/I	missense_variant	8855	12.318	DEPIDLRCI	44.7974	34.7211	60.0485
renca_1186	11	119081128	C	T	0/1	Cbx4	ENSMUSG00000039989	ENSMUST00000026665	467-475	551	474	V/I	missense_variant	8855	12.318	EPIDLRCIK	83.7152	19.7531	77.0565
renca_1187	11	119081128	C	T	0/1	Cbx4	ENSMUSG00000039989	ENSMUST00000026665	468-476	551	474	V/I	missense_variant	8855	12.318	PIDLRCIKM	41.9462	52.9643	86.8203
renca_1188	11	119081128	C	T	0/1	Cbx4	ENSMUSG00000039989	ENSMUST00000026665	469-477	551	474	V/I	missense_variant	8855	12.318	IDLRCIKMR	76.5771	61.71	78.3075
renca_1189	11	119081128	C	T	0/1	Cbx4	ENSMUSG00000039989	ENSMUST00000026665	470-478	551	474	V/I	missense_variant	8855	12.318	DLRCIKMRS	95.4923	55.6687	86.4819
renca_1190	11	119081128	C	T	0/1	Cbx4	ENSMUSG00000039989	ENSMUST00000026665	471-479	551	474	V/I	missense_variant	8855	12.318	LRCIKMRSD	92.7732	94.6539	89.3542
renca_1191	11	119081128	C	T	0/1	Cbx4	ENSMUSG00000039989	ENSMUST00000026665	472-480	551	474	V/I	missense_variant	8855	12.318	RCIKMRSDA	67.2768	43.8934	26.2933
renca_1192	11	119081128	C	T	0/1	Cbx4	ENSMUSG00000039989	ENSMUST00000026665	473-481	551	474	V/I	missense_variant	8855	12.318	CIKMRSDAG	46.4745	41.659	59.3013
renca_1193	11	119081128	C	T	0/1	Cbx4	ENSMUSG00000039989	ENSMUST00000026665	474-482	551	474	V/I	missense_variant	8855	12.318	IKMRSDAGE	91.0986	81.897	73.6749
renca_1194	12	13469942	C	G	0/1	Nbas	ENSMUSG00000020576	ENSMUST00000042953	1610-1618	2356	1618	H/Q	missense_variant	11564	8.80821	LLSLSRQLQ	78.8472	67.9571	76.3284
renca_1195	12	13469942	C	G	0/1	Nbas	ENSMUSG00000020576	ENSMUST00000042953	1611-1619	2356	1618	H/Q	missense_variant	11564	8.80821	LSLSRQLQY	20.1635	9.0493	44.4912
renca_1196	12	13469942	C	G	0/1	Nbas	ENSMUSG00000020576	ENSMUST00000042953	1612-1620	2356	1618	H/Q	missense_variant	11564	8.80821	SLSRQLQYY	32.4468	29.4243	40.6151
renca_1197	12	13469942	C	G	0/1	Nbas	ENSMUSG00000020576	ENSMUST00000042953	1613-1621	2356	1618	H/Q	missense_variant	11564	8.80821	LSRQLQYYS	27.5272	15.6701	35.1922
renca_1198	12	13469942	C	G	0/1	Nbas	ENSMUSG00000020576	ENSMUST00000042953	1614-1622	2356	1618	H/Q	missense_variant	11564	8.80821	SRQLQYYSE	57.6376	25.9563	57.3639
renca_1199	12	13469942	C	G	0/1	Nbas	ENSMUSG00000020576	ENSMUST00000042953	1615-1623	2356	1618	H/Q	missense_variant	11564	8.80821	RQLQYYSER	29.7657	16.9552	16.8308
renca_1200	12	13469942	C	G	0/1	Nbas	ENSMUSG00000020576	ENSMUST00000042953	1616-1624	2356	1618	H/Q	missense_variant	11564	8.80821	QLQYYSERL	11.6614	6.972	21.0511
renca_1201	12	13469942	C	G	0/1	Nbas	ENSMUSG00000020576	ENSMUST00000042953	1617-1625	2356	1618	H/Q	missense_variant	11564	8.80821	LQYYSERLL	8.9225	3.4987	3.778
renca_1202	12	13469942	C	G	0/1	Nbas	ENSMUSG00000020576	ENSMUST00000042953	1618-1626	2356	1618	H/Q	missense_variant	11564	8.80821	QYYSERLLD	63.8423	36.6312	8.0405
renca_1203	12	16940511	G	C	0/1	Rock2	ENSMUSG00000020580	ENSMUST00000020904	137-145	1388	145	A/P	missense_variant	39023	20.3511	FWEERDIMP	82.6318	90.3569	65.5842
renca_1204	12	16940511	G	C	0/1	Rock2	ENSMUSG00000020580	ENSMUST00000020904	138-146	1388	145	A/P	missense_variant	39023	20.3511	WEERDIMPF	30.7532	12.0978	41.6777
renca_1205	12	16940511	G	C	0/1	Rock2	ENSMUSG00000020580	ENSMUST00000020904	139-147	1388	145	A/P	missense_variant	39023	20.3511	EERDIMPFA	90.1277	24.4475	63.7513
renca_1206	12	16940511	G	C	0/1	Rock2	ENSMUSG00000020580	ENSMUST00000020904	140-148	1388	145	A/P	missense_variant	39023	20.3511	ERDIMPFAN	86.6701	62.8406	90.9776
renca_1207	12	16940511	G	C	0/1	Rock2	ENSMUSG00000020580	ENSMUST00000020904	141-149	1388	145	A/P	missense_variant	39023	20.3511	RDIMPFANS	38.3525	30.6161	57.323
renca_1208	12	16940511	G	C	0/1	Rock2	ENSMUSG00000020580	ENSMUST00000020904	142-150	1388	145	A/P	missense_variant	39023	20.3511	DIMPFANSP	76.715	34.6304	37.8886
renca_1209	12	16940511	G	C	0/1	Rock2	ENSMUSG00000020580	ENSMUST00000020904	143-151	1388	145	A/P	missense_variant	39023	20.3511	IMPFANSPW	0.1918	4.9951	3.5103
renca_1210	12	16940511	G	C	0/1	Rock2	ENSMUSG00000020580	ENSMUST00000020904	144-152	1388	145	A/P	missense_variant	39023	20.3511	MPFANSPWV	10.5986	0.0459	4.6541
renca_1211	12	16940511	G	C	0/1	Rock2	ENSMUSG00000020580	ENSMUST00000020904	145-153	1388	145	A/P	missense_variant	39023	20.3511	PFANSPWVV	49.3755	33.9598	7.8242
renca_1212	12	69579944	C	G	0/1	Vcpkmt	ENSMUSG00000049882	ENSMUST00000058639	204-212	228	212	E/Q	missense_variant	3746	26.4354	KHDEEYRSQ	68.4217	71.146	68.2804
renca_1213	12	69579944	C	G	0/1	Vcpkmt	ENSMUSG00000049882	ENSMUST00000058639	205-213	228	212	E/Q	missense_variant	3746	26.4354	HDEEYRSQD	95.0919	91.0634	96.286
renca_1214	12	69579944	C	G	0/1	Vcpkmt	ENSMUSG00000049882	ENSMUST00000058639	206-214	228	212	E/Q	missense_variant	3746	26.4354	DEEYRSQDI	66.064	37.5425	81.2808
renca_1215	12	69579944	C	G	0/1	Vcpkmt	ENSMUSG00000049882	ENSMUST00000058639	207-215	228	212	E/Q	missense_variant	3746	26.4354	EEYRSQDIH	94.2251	64.0239	93.921
renca_1216	12	69579944	C	G	0/1	Vcpkmt	ENSMUSG00000049882	ENSMUST00000058639	208-216	228	212	E/Q	missense_variant	3746	26.4354	EYRSQDIHI	45.8113	11.1851	1.2768
renca_1217	12	69579944	C	G	0/1	Vcpkmt	ENSMUSG00000049882	ENSMUST00000058639	209-217	228	212	E/Q	missense_variant	3746	26.4354	YRSQDIHIV	41.4144	20.2922	10.2078
renca_1218	12	69579944	C	G	0/1	Vcpkmt	ENSMUSG00000049882	ENSMUST00000058639	210-218	228	212	E/Q	missense_variant	3746	26.4354	RSQDIHIVY	11.4495	6.109	49.5556
renca_1219	12	69579944	C	G	0/1	Vcpkmt	ENSMUSG00000049882	ENSMUST00000058639	211-219	228	212	E/Q	missense_variant	3746	26.4354	SQDIHIVYI	3.921	4.2381	2.8303
renca_1220	12	69579944	C	G	0/1	Vcpkmt	ENSMUSG00000049882	ENSMUST00000058639	212-220	228	212	E/Q	missense_variant	3746	26.4354	QDIHIVYIR	76.9802	57.075	85.569
renca_1221	12	69582768	C	G	0/1	Vcpkmt	ENSMUSG00000049882	ENSMUST00000058639	65-73	228	73	E/D	missense_variant	3746	26.4354	ALSRRSVLD	59.7778	86.4996	75.8637
renca_1222	12	69582768	C	G	0/1	Vcpkmt	ENSMUSG00000049882	ENSMUST00000058639	66-74	228	73	E/D	missense_variant	3746	26.4354	LSRRSVLDL	6.4573	6.1374	15.5691
renca_1223	12	69582768	C	G	0/1	Vcpkmt	ENSMUSG00000049882	ENSMUST00000058639	67-75	228	73	E/D	missense_variant	3746	26.4354	SRRSVLDLG	62.1548	43.5451	31.8382
renca_1224	12	69582768	C	G	0/1	Vcpkmt	ENSMUSG00000049882	ENSMUST00000058639	68-76	228	73	E/D	missense_variant	3746	26.4354	RRSVLDLGS	81.2811	77.4606	72.3365
renca_1225	12	69582768	C	G	0/1	Vcpkmt	ENSMUSG00000049882	ENSMUST00000058639	69-77	228	73	E/D	missense_variant	3746	26.4354	RSVLDLGSG	33.2509	67.3927	46.2769
renca_1226	12	69582768	C	G	0/1	Vcpkmt	ENSMUSG00000049882	ENSMUST00000058639	70-78	228	73	E/D	missense_variant	3746	26.4354	SVLDLGSGT	82.0644	44.9357	33.2978
renca_1227	12	69582768	C	G	0/1	Vcpkmt	ENSMUSG00000049882	ENSMUST00000058639	71-79	228	73	E/D	missense_variant	3746	26.4354	VLDLGSGTG	62.5417	77.4869	62.8937
renca_1228	12	69582768	C	G	0/1	Vcpkmt	ENSMUSG00000049882	ENSMUST00000058639	72-80	228	73	E/D	missense_variant	3746	26.4354	LDLGSGTGA	90.3385	46.4329	59.9365
renca_1229	12	69582768	C	G	0/1	Vcpkmt	ENSMUSG00000049882	ENSMUST00000058639	73-81	228	73	E/D	missense_variant	3746	26.4354	DLGSGTGAV	66.1837	41.5318	37.1244
renca_1230	12	72574133	G	C	0/1	Pcnx4	ENSMUSG00000034501	ENSMUST00000044352	901-909	1177	909	S/T	missense_variant	2963	4.99403	AYIPLVEFT	54.6625	30.9137	0.3851
renca_1231	12	72574133	G	C	0/1	Pcnx4	ENSMUSG00000034501	ENSMUST00000044352	902-910	1177	909	S/T	missense_variant	2963	4.99403	YIPLVEFTC	11.6444	46.8753	58.5708
renca_1232	12	72574133	G	C	0/1	Pcnx4	ENSMUSG00000034501	ENSMUST00000044352	903-911	1177	909	S/T	missense_variant	2963	4.99403	IPLVEFTCS	56.4206	3.2297	58.1639
renca_1233	12	72574133	G	C	0/1	Pcnx4	ENSMUSG00000034501	ENSMUST00000044352	904-912	1177	909	S/T	missense_variant	2963	4.99403	PLVEFTCSQ	90.9501	92.1233	88.5016
renca_1234	12	72574133	G	C	0/1	Pcnx4	ENSMUSG00000034501	ENSMUST00000044352	905-913	1177	909	S/T	missense_variant	2963	4.99403	LVEFTCSQS	76.0891	62.3982	58.5526
renca_1235	12	72574133	G	C	0/1	Pcnx4	ENSMUSG00000034501	ENSMUST00000044352	906-914	1177	909	S/T	missense_variant	2963	4.99403	VEFTCSQSR	72.658	22.5704	45.8194
renca_1236	12	72574133	G	C	0/1	Pcnx4	ENSMUSG00000034501	ENSMUST00000044352	907-915	1177	909	S/T	missense_variant	2963	4.99403	EFTCSQSRL	33.2881	16.0286	3.9878
renca_1237	12	72574133	G	C	0/1	Pcnx4	ENSMUSG00000034501	ENSMUST00000044352	908-916	1177	909	S/T	missense_variant	2963	4.99403	FTCSQSRLL	6.3036	13.1368	10.1652
renca_1238	12	72574133	G	C	0/1	Pcnx4	ENSMUSG00000034501	ENSMUST00000044352	909-917	1177	909	S/T	missense_variant	2963	4.99403	TCSQSRLLS	79.9611	64.3715	72.0095
renca_1239	12	75952897	A	C	0/1	Syne2	ENSMUSG00000063450	ENSMUST00000044217	2347-2355	6874	2355	S/R	missense_variant	135306	36.692	LNSILKSKR	64.7411	57.6562	62.8419
renca_1240	12	75952897	A	C	0/1	Syne2	ENSMUSG00000063450	ENSMUST00000044217	2348-2356	6874	2355	S/R	missense_variant	135306	36.692	NSILKSKRS	59.4709	57.2719	55.4386
renca_1241	12	75952897	A	C	0/1	Syne2	ENSMUSG00000063450	ENSMUST00000044217	2349-2357	6874	2355	S/R	missense_variant	135306	36.692	SILKSKRST	82.511	40.7752	27.1754
renca_1242	12	75952897	A	C	0/1	Syne2	ENSMUSG00000063450	ENSMUST00000044217	2350-2358	6874	2355	S/R	missense_variant	135306	36.692	ILKSKRSTE	77.4081	44.9751	65.9712
renca_1243	12	75952897	A	C	0/1	Syne2	ENSMUSG00000063450	ENSMUST00000044217	2351-2359	6874	2355	S/R	missense_variant	135306	36.692	LKSKRSTEK	79.7878	73.6375	69.5491
renca_1244	12	75952897	A	C	0/1	Syne2	ENSMUSG00000063450	ENSMUST00000044217	2352-2360	6874	2355	S/R	missense_variant	135306	36.692	KSKRSTEKH	60.375	78.8135	75.2808
renca_1245	12	75952897	A	C	0/1	Syne2	ENSMUSG00000063450	ENSMUST00000044217	2353-2361	6874	2355	S/R	missense_variant	135306	36.692	SKRSTEKHV	85.038	45.2907	36.067
renca_1246	12	75952897	A	C	0/1	Syne2	ENSMUSG00000063450	ENSMUST00000044217	2354-2362	6874	2355	S/R	missense_variant	135306	36.692	KRSTEKHVK	83.1845	75.6918	58.2849
renca_1247	12	75952897	A	C	0/1	Syne2	ENSMUSG00000063450	ENSMUST00000044217	2355-2363	6874	2355	S/R	missense_variant	135306	36.692	RSTEKHVKF	0.6687	5.3467	20.4584
renca_1248	12	76025648	T	G	0/1	Syne2	ENSMUSG00000063450	ENSMUST00000044217	4484-4492	6874	4492	L/R	missense_variant	135306	36.692	ELQAYTTQR	79.9328	45.7983	71.9202
renca_1249	12	76025648	T	G	0/1	Syne2	ENSMUSG00000063450	ENSMUST00000044217	4485-4493	6874	4492	L/R	missense_variant	135306	36.692	LQAYTTQRE	74.3304	74.7793	47.5384
renca_1250	12	76025648	T	G	0/1	Syne2	ENSMUSG00000063450	ENSMUST00000044217	4486-4494	6874	4492	L/R	missense_variant	135306	36.692	QAYTTQREE	73.8221	34.1632	64.1424
renca_1251	12	76025648	T	G	0/1	Syne2	ENSMUSG00000063450	ENSMUST00000044217	4487-4495	6874	4492	L/R	missense_variant	135306	36.692	AYTTQREEL	21.9879	8.7009	0.0643
renca_1252	12	76025648	T	G	0/1	Syne2	ENSMUSG00000063450	ENSMUST00000044217	4488-4496	6874	4492	L/R	missense_variant	135306	36.692	YTTQREELR	43.6471	66.5183	70.6027
renca_1253	12	76025648	T	G	0/1	Syne2	ENSMUSG00000063450	ENSMUST00000044217	4489-4497	6874	4492	L/R	missense_variant	135306	36.692	TTQREELRQ	78.2885	91.3915	95.6755
renca_1254	12	76025648	T	G	0/1	Syne2	ENSMUSG00000063450	ENSMUST00000044217	4490-4498	6874	4492	L/R	missense_variant	135306	36.692	TQREELRQE	89.509	72.9754	78.8478
renca_1255	12	76025648	T	G	0/1	Syne2	ENSMUSG00000063450	ENSMUST00000044217	4491-4499	6874	4492	L/R	missense_variant	135306	36.692	QREELRQEA	88.0844	58.7313	61.874
renca_1256	12	76025648	T	G	0/1	Syne2	ENSMUSG00000063450	ENSMUST00000044217	4492-4500	6874	4492	L/R	missense_variant	135306	36.692	REELRQEAN	90.5196	78.1392	93.7535
renca_1257	12	78797321	G	A	0/1	Mpp5	ENSMUSG00000021112	ENSMUST00000082024	92-100	675	100	D/N	missense_variant	12373	10.2169	QIPPKTGIN	63.5208	88.9641	91.7
renca_1258	12	78797321	G	A	0/1	Mpp5	ENSMUSG00000021112	ENSMUST00000082024	93-101	675	100	D/N	missense_variant	12373	10.2169	IPPKTGINN	61.3512	20.6591	88.3772
renca_1259	12	78797321	G	A	0/1	Mpp5	ENSMUSG00000021112	ENSMUST00000082024	94-102	675	100	D/N	missense_variant	12373	10.2169	PPKTGINNP	97.2425	76.4098	95.964
renca_1260	12	78797321	G	A	0/1	Mpp5	ENSMUSG00000021112	ENSMUST00000082024	95-103	675	100	D/N	missense_variant	12373	10.2169	PKTGINNPI	81.951	60.769	32.238
renca_1261	12	78797321	G	A	0/1	Mpp5	ENSMUSG00000021112	ENSMUST00000082024	96-104	675	100	D/N	missense_variant	12373	10.2169	KTGINNPIF	1.885	8.2958	22.3272
renca_1262	12	78797321	G	A	0/1	Mpp5	ENSMUSG00000021112	ENSMUST00000082024	97-105	675	100	D/N	missense_variant	12373	10.2169	TGINNPIFD	27.3961	37.0735	56.895
renca_1263	12	78797321	G	A	0/1	Mpp5	ENSMUSG00000021112	ENSMUST00000082024	98-106	675	100	D/N	missense_variant	12373	10.2169	GINNPIFDT	92.3189	82.0506	82.4991
renca_1264	12	78797321	G	A	0/1	Mpp5	ENSMUSG00000021112	ENSMUST00000082024	99-107	675	100	D/N	missense_variant	12373	10.2169	INNPIFDTE	21.3427	32.3811	48.1656
renca_1265	12	78797321	G	A	0/1	Mpp5	ENSMUSG00000021112	ENSMUST00000082024	100-108	675	100	D/N	missense_variant	12373	10.2169	NNPIFDTEE	29.857	59.425	82.389
renca_1266	12	81919113	A	G	0/1	Pcnx	ENSMUSG00000021140	ENSMUST00000021567	677-685	2344	685	S/G	missense_variant	3578	1.6609	ASRRTSSTG	24.4529	36.7515	24.819
renca_1267	12	81919113	A	G	0/1	Pcnx	ENSMUSG00000021140	ENSMUST00000021567	678-686	2344	685	S/G	missense_variant	3578	1.6609	SRRTSSTGS	91.2559	64.2556	41.9728
renca_1268	12	81919113	A	G	0/1	Pcnx	ENSMUSG00000021140	ENSMUST00000021567	679-687	2344	685	S/G	missense_variant	3578	1.6609	RRTSSTGSA	70.2782	56.8062	28.4307
renca_1269	12	81919113	A	G	0/1	Pcnx	ENSMUSG00000021140	ENSMUST00000021567	680-688	2344	685	S/G	missense_variant	3578	1.6609	RTSSTGSAK	36.3541	35.7368	20
renca_1270	12	81919113	A	G	0/1	Pcnx	ENSMUSG00000021140	ENSMUST00000021567	681-689	2344	685	S/G	missense_variant	3578	1.6609	TSSTGSAKT	47.602	61.1236	45.2856
renca_1271	12	81919113	A	G	0/1	Pcnx	ENSMUSG00000021140	ENSMUST00000021567	682-690	2344	685	S/G	missense_variant	3578	1.6609	SSTGSAKTR	54.0846	64.4101	46.598
renca_1272	12	81919113	A	G	0/1	Pcnx	ENSMUSG00000021140	ENSMUST00000021567	683-691	2344	685	S/G	missense_variant	3578	1.6609	STGSAKTRA	48.9603	40.2104	27.6578
renca_1273	12	81919113	A	G	0/1	Pcnx	ENSMUSG00000021140	ENSMUST00000021567	684-692	2344	685	S/G	missense_variant	3578	1.6609	TGSAKTRAR	34.5266	38.8872	55.6413
renca_1274	12	81919113	A	G	0/1	Pcnx	ENSMUSG00000021140	ENSMUST00000021567	685-693	2344	685	S/G	missense_variant	3578	1.6609	GSAKTRARV	15.3364	31.7134	7.0397
renca_1275	12	82341668	T	G	0/1	Sipa1l1	ENSMUSG00000042700	ENSMUST00000053969	215-223	1782	223	F/V	missense_variant	23585	13.3478	QGTSGDSFV	16.5787	21.0666	15.4992
renca_1276	12	82341668	T	G	0/1	Sipa1l1	ENSMUSG00000042700	ENSMUST00000053969	216-224	1782	223	F/V	missense_variant	23585	13.3478	GTSGDSFVD	79.505	93.7491	91.826
renca_1277	12	82341668	T	G	0/1	Sipa1l1	ENSMUSG00000042700	ENSMUST00000053969	217-225	1782	223	F/V	missense_variant	23585	13.3478	TSGDSFVDL	4.0918	5.747	25.4115
renca_1278	12	82341668	T	G	0/1	Sipa1l1	ENSMUSG00000042700	ENSMUST00000053969	218-226	1782	223	F/V	missense_variant	23585	13.3478	SGDSFVDLL	0.2128	4.0202	8.154
renca_1279	12	82341668	T	G	0/1	Sipa1l1	ENSMUSG00000042700	ENSMUST00000053969	219-227	1782	223	F/V	missense_variant	23585	13.3478	GDSFVDLLK	67.1863	64.5787	88.1742
renca_1280	12	82341668	T	G	0/1	Sipa1l1	ENSMUSG00000042700	ENSMUST00000053969	220-228	1782	223	F/V	missense_variant	23585	13.3478	DSFVDLLKG	47.9584	55.7562	76.6073
renca_1281	12	82341668	T	G	0/1	Sipa1l1	ENSMUSG00000042700	ENSMUST00000053969	221-229	1782	223	F/V	missense_variant	23585	13.3478	SFVDLLKGY	74.6772	44.0954	39.3086
renca_1282	12	82341668	T	G	0/1	Sipa1l1	ENSMUSG00000042700	ENSMUST00000053969	222-230	1782	223	F/V	missense_variant	23585	13.3478	FVDLLKGYK	46.5009	34.4812	42.5109
renca_1283	12	82341668	T	G	0/1	Sipa1l1	ENSMUSG00000042700	ENSMUST00000053969	223-231	1782	223	F/V	missense_variant	23585	13.3478	VDLLKGYKD	82.9283	70.4202	93.4491
renca_1284	12	84331734	A	C	0/1	Zfp410	ENSMUSG00000042472	ENSMUST00000045931	269-277	478	277	K/N	missense_variant	6600	4.31049	HMRTHNGEN	80.6845	51.715	58.6797
renca_1285	12	84331734	A	C	0/1	Zfp410	ENSMUSG00000042472	ENSMUST00000045931	270-278	478	277	K/N	missense_variant	6600	4.31049	MRTHNGENP	88.2227	79.5972	48.7001
renca_1286	12	84331734	A	C	0/1	Zfp410	ENSMUSG00000042472	ENSMUST00000045931	271-279	478	277	K/N	missense_variant	6600	4.31049	RTHNGENPF	5.8523	4.5711	9.6282
renca_1287	12	84331734	A	C	0/1	Zfp410	ENSMUSG00000042472	ENSMUST00000045931	272-280	478	277	K/N	missense_variant	6600	4.31049	THNGENPFM	19.8566	5.022	5.3955
renca_1288	12	84331734	A	C	0/1	Zfp410	ENSMUSG00000042472	ENSMUST00000045931	273-281	478	277	K/N	missense_variant	6600	4.31049	HNGENPFMC	31.3517	38.4786	58.0354
renca_1289	12	84331734	A	C	0/1	Zfp410	ENSMUSG00000042472	ENSMUST00000045931	274-282	478	277	K/N	missense_variant	6600	4.31049	NGENPFMCH	51.1674	56.7969	94.9846
renca_1290	12	84331734	A	C	0/1	Zfp410	ENSMUSG00000042472	ENSMUST00000045931	275-283	478	277	K/N	missense_variant	6600	4.31049	GENPFMCHE	90.0475	62.033	75.8288
renca_1291	12	84331734	A	C	0/1	Zfp410	ENSMUSG00000042472	ENSMUST00000045931	276-284	478	277	K/N	missense_variant	6600	4.31049	ENPFMCHES	15.8779	44.3216	51.7836
renca_1292	12	84331734	A	C	0/1	Zfp410	ENSMUSG00000042472	ENSMUST00000045931	277-285	478	277	K/N	missense_variant	6600	4.31049	NPFMCHESG	36.3333	2.3008	41.3092
renca_1293	12	100654423	T	G	0/1	Rps6ka5	ENSMUSG00000021180	ENSMUST00000043599	72-80	863	80	K/T	missense_variant	1270	0.771398	DAGKLYAMT	59.119	30.2357	65.1168
renca_1294	12	100654423	T	G	0/1	Rps6ka5	ENSMUSG00000021180	ENSMUST00000043599	73-81	863	80	K/T	missense_variant	1270	0.771398	AGKLYAMTV	1.6407	4.008	9.7083
renca_1295	12	100654423	T	G	0/1	Rps6ka5	ENSMUSG00000021180	ENSMUST00000043599	74-82	863	80	K/T	missense_variant	1270	0.771398	GKLYAMTVL	38.0877	18.7251	7.637
renca_1296	12	100654423	T	G	0/1	Rps6ka5	ENSMUSG00000021180	ENSMUST00000043599	75-83	863	80	K/T	missense_variant	1270	0.771398	KLYAMTVLK	20.5537	16.7631	20.5698
renca_1297	12	100654423	T	G	0/1	Rps6ka5	ENSMUSG00000021180	ENSMUST00000043599	76-84	863	80	K/T	missense_variant	1270	0.771398	LYAMTVLKK	52.1775	45.4295	15.1573
renca_1298	12	100654423	T	G	0/1	Rps6ka5	ENSMUSG00000021180	ENSMUST00000043599	77-85	863	80	K/T	missense_variant	1270	0.771398	YAMTVLKKA	42.2632	11.7215	7.2193
renca_1299	12	100654423	T	G	0/1	Rps6ka5	ENSMUSG00000021180	ENSMUST00000043599	78-86	863	80	K/T	missense_variant	1270	0.771398	AMTVLKKAT	82.1376	69.1971	30.1538
renca_1300	12	100654423	T	G	0/1	Rps6ka5	ENSMUSG00000021180	ENSMUST00000043599	79-87	863	80	K/T	missense_variant	1270	0.771398	MTVLKKATI	4.1236	7.7681	3.2987
renca_1301	12	100654423	T	G	0/1	Rps6ka5	ENSMUSG00000021180	ENSMUST00000043599	80-88	863	80	K/T	missense_variant	1270	0.771398	TVLKKATIV	24.5149	11.5396	6.0131
renca_1302	12	105813266	T	G	0/1	Papola	ENSMUSG00000021111	ENSMUST00000021535	359-367	739	367	F/V	missense_variant&NMD_transcript_variant	35263	38.7519	SKLFEAPNV	49.2271	16.8256	17.2032
renca_1303	12	105813266	T	G	0/1	Papola	ENSMUSG00000021111	ENSMUST00000021535	360-368	739	367	F/V	missense_variant&NMD_transcript_variant	35263	38.7519	KLFEAPNVF	5.8548	2.3802	2.8776
renca_1304	12	105813266	T	G	0/1	Papola	ENSMUSG00000021111	ENSMUST00000021535	361-369	739	367	F/V	missense_variant&NMD_transcript_variant	35263	38.7519	LFEAPNVFQ	85.8956	65.1033	80.4231
renca_1305	12	105813266	T	G	0/1	Papola	ENSMUSG00000021111	ENSMUST00000021535	362-370	739	367	F/V	missense_variant&NMD_transcript_variant	35263	38.7519	FEAPNVFQK	50.3051	18.9637	28.6122
renca_1306	12	105813266	T	G	0/1	Papola	ENSMUSG00000021111	ENSMUST00000021535	363-371	739	367	F/V	missense_variant&NMD_transcript_variant	35263	38.7519	EAPNVFQKY	16.0782	19.7596	71.1464
renca_1307	12	105813266	T	G	0/1	Papola	ENSMUSG00000021111	ENSMUST00000021535	364-372	739	367	F/V	missense_variant&NMD_transcript_variant	35263	38.7519	APNVFQKYK	55.7011	5.2956	59.268
renca_1308	12	105813266	T	G	0/1	Papola	ENSMUSG00000021111	ENSMUST00000021535	365-373	739	367	F/V	missense_variant&NMD_transcript_variant	35263	38.7519	PNVFQKYKH	96.2815	96.0178	96.7941
renca_1309	12	105813266	T	G	0/1	Papola	ENSMUSG00000021111	ENSMUST00000021535	366-374	739	367	F/V	missense_variant&NMD_transcript_variant	35263	38.7519	NVFQKYKHY	52.3902	13.5682	71.3118
renca_1310	12	105813266	T	G	0/1	Papola	ENSMUSG00000021111	ENSMUST00000021535	367-375	739	367	F/V	missense_variant&NMD_transcript_variant	35263	38.7519	VFQKYKHYI	5.8953	1.6527	0.7048
renca_1311	12	108318503	C	T	0/1	Hhipl1	ENSMUSG00000021260	ENSMUST00000021685	364-372	791	372	R/C	missense_variant	1939	2.509	RIDVDRKEC	75.8593	74.6944	82.3435
renca_1312	12	108318503	C	T	0/1	Hhipl1	ENSMUSG00000021260	ENSMUST00000021685	365-373	791	372	R/C	missense_variant	1939	2.509	IDVDRKECG	84.041	85.6558	94.6065
renca_1313	12	108318503	C	T	0/1	Hhipl1	ENSMUSG00000021260	ENSMUST00000021685	366-374	791	372	R/C	missense_variant	1939	2.509	DVDRKECGL	31.9598	33.8006	73.4449
renca_1314	12	108318503	C	T	0/1	Hhipl1	ENSMUSG00000021260	ENSMUST00000021685	367-375	791	372	R/C	missense_variant	1939	2.509	VDRKECGLH	78.7588	76.9396	96.531
renca_1315	12	108318503	C	T	0/1	Hhipl1	ENSMUSG00000021260	ENSMUST00000021685	368-376	791	372	R/C	missense_variant	1939	2.509	DRKECGLHY	90.3028	48.5404	91.2204
renca_1316	12	108318503	C	T	0/1	Hhipl1	ENSMUSG00000021260	ENSMUST00000021685	369-377	791	372	R/C	missense_variant	1939	2.509	RKECGLHYG	74.4093	61.4256	60.8459
renca_1317	12	108318503	C	T	0/1	Hhipl1	ENSMUSG00000021260	ENSMUST00000021685	370-378	791	372	R/C	missense_variant	1939	2.509	KECGLHYGI	35.8402	8.3018	18.0627
renca_1318	12	108318503	C	T	0/1	Hhipl1	ENSMUSG00000021260	ENSMUST00000021685	371-379	791	372	R/C	missense_variant	1939	2.509	ECGLHYGIP	94.0855	91.0887	96.1229
renca_1319	12	108318503	C	T	0/1	Hhipl1	ENSMUSG00000021260	ENSMUST00000021685	372-380	791	372	R/C	missense_variant	1939	2.509	CGLHYGIPP	16.3566	24.9716	29.1452
renca_1320	12	110580444	A	G	0/1	Ppp2r5c	ENSMUSG00000017843	ENSMUST00000084985	488-496	524	496	K/R	missense_variant	14526	12.7054	KDRPLVRRR	80.2709	67.3688	92.759
renca_1321	12	110580444	A	G	0/1	Ppp2r5c	ENSMUSG00000017843	ENSMUST00000084985	489-497	524	496	K/R	missense_variant	14526	12.7054	DRPLVRRRS	86.8326	71.8421	89.184
renca_1322	12	110580444	A	G	0/1	Ppp2r5c	ENSMUSG00000017843	ENSMUST00000084985	490-498	524	496	K/R	missense_variant	14526	12.7054	RPLVRRRSE	68.826	5.5829	79.0782
renca_1323	12	110580444	A	G	0/1	Ppp2r5c	ENSMUSG00000017843	ENSMUST00000084985	491-499	524	496	K/R	missense_variant	14526	12.7054	PLVRRRSEL	27.8912	27.5931	19.7947
renca_1324	12	110580444	A	G	0/1	Ppp2r5c	ENSMUSG00000017843	ENSMUST00000084985	492-500	524	496	K/R	missense_variant	14526	12.7054	LVRRRSELP	44.9024	54.4869	71.2757
renca_1325	12	110580444	A	G	0/1	Ppp2r5c	ENSMUSG00000017843	ENSMUST00000084985	493-501	524	496	K/R	missense_variant	14526	12.7054	VRRRSELPQ	89.4502	72.6698	82.7078
renca_1326	12	110580444	A	G	0/1	Ppp2r5c	ENSMUSG00000017843	ENSMUST00000084985	494-502	524	496	K/R	missense_variant	14526	12.7054	RRRSELPQD	85.4461	88.2874	88.6663
renca_1327	12	110580444	A	G	0/1	Ppp2r5c	ENSMUSG00000017843	ENSMUST00000084985	495-503	524	496	K/R	missense_variant	14526	12.7054	RRSELPQDP	95.2181	95.2708	83.8861
renca_1328	12	110580444	A	G	0/1	Ppp2r5c	ENSMUSG00000017843	ENSMUST00000084985	496-504	524	496	K/R	missense_variant	14526	12.7054	RSELPQDPH	51.8123	80.4968	88.6132
renca_1329	12	110625492	A	C	0/1	Dync1h1	ENSMUSG00000018707	ENSMUST00000018851	1064-1072	4644	1072	E/D	missense_variant	87043	40.2889	ENIYNRLGD	73.6985	69.3124	77.012
renca_1330	12	110625492	A	C	0/1	Dync1h1	ENSMUSG00000018707	ENSMUST00000018851	1065-1073	4644	1072	E/D	missense_variant	87043	40.2889	NIYNRLGDD	85.9889	77.0709	91.3065
renca_1331	12	110625492	A	C	0/1	Dync1h1	ENSMUSG00000018707	ENSMUST00000018851	1066-1074	4644	1072	E/D	missense_variant	87043	40.2889	IYNRLGDDL	18.2079	7.2839	0.1239
renca_1332	12	110625492	A	C	0/1	Dync1h1	ENSMUSG00000018707	ENSMUST00000018851	1067-1075	4644	1072	E/D	missense_variant	87043	40.2889	YNRLGDDLN	59.6799	58.8219	74.5076
renca_1333	12	110625492	A	C	0/1	Dync1h1	ENSMUSG00000018707	ENSMUST00000018851	1068-1076	4644	1072	E/D	missense_variant	87043	40.2889	NRLGDDLNK	95.1269	75.1095	71.289
renca_1334	12	110625492	A	C	0/1	Dync1h1	ENSMUSG00000018707	ENSMUST00000018851	1069-1077	4644	1072	E/D	missense_variant	87043	40.2889	RLGDDLNKW	27.5111	53.0089	42.8031
renca_1335	12	110625492	A	C	0/1	Dync1h1	ENSMUSG00000018707	ENSMUST00000018851	1070-1078	4644	1072	E/D	missense_variant	87043	40.2889	LGDDLNKWQ	69.2206	82.3668	96.3104
renca_1336	12	110625492	A	C	0/1	Dync1h1	ENSMUSG00000018707	ENSMUST00000018851	1071-1079	4644	1072	E/D	missense_variant	87043	40.2889	GDDLNKWQA	72.682	52.8026	80.7021
renca_1337	12	110625492	A	C	0/1	Dync1h1	ENSMUSG00000018707	ENSMUST00000018851	1072-1080	4644	1072	E/D	missense_variant	87043	40.2889	DDLNKWQAL	28.1512	3.3743	42.3741
renca_1338	12	110628766	T	G	0/1	Dync1h1	ENSMUSG00000018707	ENSMUST00000018851	1363-1371	4644	1371	F/V	missense_variant	87043	40.2889	GLLNQLKNV	61.2054	59.2938	19.654
renca_1339	12	110628766	T	G	0/1	Dync1h1	ENSMUSG00000018707	ENSMUST00000018851	1364-1372	4644	1371	F/V	missense_variant	87043	40.2889	LLNQLKNVP	86.2967	83.785	50.5375
renca_1340	12	110628766	T	G	0/1	Dync1h1	ENSMUSG00000018707	ENSMUST00000018851	1365-1373	4644	1371	F/V	missense_variant	87043	40.2889	LNQLKNVPA	29.217	17.5625	33.9948
renca_1341	12	110628766	T	G	0/1	Dync1h1	ENSMUSG00000018707	ENSMUST00000018851	1366-1374	4644	1371	F/V	missense_variant	87043	40.2889	NQLKNVPAR	68.5931	31.4571	20.7732
renca_1342	12	110628766	T	G	0/1	Dync1h1	ENSMUSG00000018707	ENSMUST00000018851	1367-1375	4644	1371	F/V	missense_variant	87043	40.2889	QLKNVPARL	39.5351	11.7708	26.4615
renca_1343	12	110628766	T	G	0/1	Dync1h1	ENSMUSG00000018707	ENSMUST00000018851	1368-1376	4644	1371	F/V	missense_variant	87043	40.2889	LKNVPARLR	93.557	66.3831	88.5565
renca_1344	12	110628766	T	G	0/1	Dync1h1	ENSMUSG00000018707	ENSMUST00000018851	1369-1377	4644	1371	F/V	missense_variant	87043	40.2889	KNVPARLRQ	57.0635	59.5531	66.946
renca_1345	12	110628766	T	G	0/1	Dync1h1	ENSMUSG00000018707	ENSMUST00000018851	1370-1378	4644	1371	F/V	missense_variant	87043	40.2889	NVPARLRQY	22.9068	27.2353	73.4696
renca_1346	12	110628766	T	G	0/1	Dync1h1	ENSMUSG00000018707	ENSMUST00000018851	1371-1379	4644	1371	F/V	missense_variant	87043	40.2889	VPARLRQYA	36.4246	0.9627	16.2701
renca_1347	12	111627510	A	T	0/1	Mark3	ENSMUSG00000007411	ENSMUST00000075281	262-270	729	270	Y/F	missense_variant	23474	17.539	RERVLRGKF	36.5519	7.5993	43.0576
renca_1348	12	111627510	A	T	0/1	Mark3	ENSMUSG00000007411	ENSMUST00000075281	263-271	729	270	Y/F	missense_variant	23474	17.539	ERVLRGKFR	95.0993	52.1584	88.2108
renca_1349	12	111627510	A	T	0/1	Mark3	ENSMUSG00000007411	ENSMUST00000075281	264-272	729	270	Y/F	missense_variant	23474	17.539	RVLRGKFRI	6.1735	2.8164	3.2127
renca_1350	12	111627510	A	T	0/1	Mark3	ENSMUSG00000007411	ENSMUST00000075281	265-273	729	270	Y/F	missense_variant	23474	17.539	VLRGKFRIP	59.873	53.8037	75.579
renca_1351	12	111627510	A	T	0/1	Mark3	ENSMUSG00000007411	ENSMUST00000075281	266-274	729	270	Y/F	missense_variant	23474	17.539	LRGKFRIPF	13.1477	4.8119	25.089
renca_1352	12	111627510	A	T	0/1	Mark3	ENSMUSG00000007411	ENSMUST00000075281	267-275	729	270	Y/F	missense_variant	23474	17.539	RGKFRIPFY	3.7908	7.4484	56.9238
renca_1353	12	111627510	A	T	0/1	Mark3	ENSMUSG00000007411	ENSMUST00000075281	268-276	729	270	Y/F	missense_variant	23474	17.539	GKFRIPFYM	30.7638	3.0501	9.7651
renca_1354	12	111627510	A	T	0/1	Mark3	ENSMUSG00000007411	ENSMUST00000075281	269-277	729	270	Y/F	missense_variant	23474	17.539	KFRIPFYMS	51.491	26.8049	35.1816
renca_1355	12	111627510	A	T	0/1	Mark3	ENSMUSG00000007411	ENSMUST00000075281	270-278	729	270	Y/F	missense_variant	23474	17.539	FRIPFYMST	39.2835	22.4457	20.2736
renca_1356	12	111823869	G	A	0/1	Zfyve21	ENSMUSG00000021286	ENSMUST00000021714	94-102	234	102	V/M	missense_variant	2020	7.62895	RQCADCALM	17.9946	11.3976	3.9017
renca_1357	12	111823869	G	A	0/1	Zfyve21	ENSMUSG00000021286	ENSMUST00000021714	95-103	234	102	V/M	missense_variant	2020	7.62895	QCADCALMS	91.0748	84.7471	88.0077
renca_1358	12	111823869	G	A	0/1	Zfyve21	ENSMUSG00000021286	ENSMUST00000021714	96-104	234	102	V/M	missense_variant	2020	7.62895	CADCALMSH	53.4882	44.3983	73.9449
renca_1359	12	111823869	G	A	0/1	Zfyve21	ENSMUSG00000021286	ENSMUST00000021714	97-105	234	102	V/M	missense_variant	2020	7.62895	ADCALMSHR	78.6563	66.7091	66.6302
renca_1360	12	111823869	G	A	0/1	Zfyve21	ENSMUSG00000021286	ENSMUST00000021714	98-106	234	102	V/M	missense_variant	2020	7.62895	DCALMSHRE	88.5685	70.2759	91.1328
renca_1361	12	111823869	G	A	0/1	Zfyve21	ENSMUSG00000021286	ENSMUST00000021714	99-107	234	102	V/M	missense_variant	2020	7.62895	CALMSHREA	27.4344	7.6137	7.486
renca_1362	12	111823869	G	A	0/1	Zfyve21	ENSMUSG00000021286	ENSMUST00000021714	100-108	234	102	V/M	missense_variant	2020	7.62895	ALMSHREAE	67.39	33.4695	24.2946
renca_1363	12	111823869	G	A	0/1	Zfyve21	ENSMUSG00000021286	ENSMUST00000021714	101-109	234	102	V/M	missense_variant	2020	7.62895	LMSHREAEF	5.6995	7.3933	17.8427
renca_1364	12	111823869	G	A	0/1	Zfyve21	ENSMUSG00000021286	ENSMUST00000021714	102-110	234	102	V/M	missense_variant	2020	7.62895	MSHREAEFY	10.5571	14.73	34.0452
renca_1365	12	112772913	G	C	0/1	Ahnak2	ENSMUSG00000072812	ENSMUST00000101010	761-769	770	769	A/G	missense_variant	27865	14.2591	DKPIPRPVG	79.901	81.3821	95.9616
renca_1366	12	112772913	G	C	0/1	Ahnak2	ENSMUSG00000072812	ENSMUST00000101010	762-770	770	769	A/G	missense_variant	27865	14.2591	KPIPRPVGK	65.6953	7.8604	67.0829
renca_1367	12	112773591	C	G	0/1	Ahnak2	ENSMUSG00000072812	ENSMUST00000101010	535-543	770	543	S/T	missense_variant	27865	14.2591	APDSQPQET	89.1079	30.1062	92.3962
renca_1368	12	112773591	C	G	0/1	Ahnak2	ENSMUSG00000072812	ENSMUST00000101010	536-544	770	543	S/T	missense_variant	27865	14.2591	PDSQPQETV	76.768	79.8468	84.7628
renca_1369	12	112773591	C	G	0/1	Ahnak2	ENSMUSG00000072812	ENSMUST00000101010	537-545	770	543	S/T	missense_variant	27865	14.2591	DSQPQETVG	71.7891	65.9261	81.5712
renca_1370	12	112773591	C	G	0/1	Ahnak2	ENSMUSG00000072812	ENSMUST00000101010	538-546	770	543	S/T	missense_variant	27865	14.2591	SQPQETVGG	35.7158	72.6443	56.1948
renca_1371	12	112773591	C	G	0/1	Ahnak2	ENSMUSG00000072812	ENSMUST00000101010	539-547	770	543	S/T	missense_variant	27865	14.2591	QPQETVGGA	88.8071	16.799	69.3337
renca_1372	12	112773591	C	G	0/1	Ahnak2	ENSMUSG00000072812	ENSMUST00000101010	540-548	770	543	S/T	missense_variant	27865	14.2591	PQETVGGAP	97.0806	96.7192	84.9013
renca_1373	12	112773591	C	G	0/1	Ahnak2	ENSMUSG00000072812	ENSMUST00000101010	541-549	770	543	S/T	missense_variant	27865	14.2591	QETVGGAPS	95.6314	56.175	64.5921
renca_1374	12	112773591	C	G	0/1	Ahnak2	ENSMUSG00000072812	ENSMUST00000101010	542-550	770	543	S/T	missense_variant	27865	14.2591	ETVGGAPSP	88.6895	79.4965	65.241
renca_1375	12	112773591	C	G	0/1	Ahnak2	ENSMUSG00000072812	ENSMUST00000101010	543-551	770	543	S/T	missense_variant	27865	14.2591	TVGGAPSPA	71.8819	36.9938	33.8333
renca_1376	13	3585194	T	C	0/1	Fam208b	ENSMUSG00000033799	ENSMUST00000096069	530-538	2382	538	S/G	missense_variant	11031	6.4194	NMLADLALG	56.0423	45.8026	21.319
renca_1377	13	3585194	T	C	0/1	Fam208b	ENSMUSG00000033799	ENSMUST00000096069	531-539	2382	538	S/G	missense_variant	11031	6.4194	MLADLALGS	68.4541	58.8563	51.7238
renca_1378	13	3585194	T	C	0/1	Fam208b	ENSMUSG00000033799	ENSMUST00000096069	532-540	2382	538	S/G	missense_variant	11031	6.4194	LADLALGSA	34.8761	27.5034	41.6304
renca_1379	13	3585194	T	C	0/1	Fam208b	ENSMUSG00000033799	ENSMUST00000096069	533-541	2382	538	S/G	missense_variant	11031	6.4194	ADLALGSAA	75.0248	29.83	25.2379
renca_1380	13	3585194	T	C	0/1	Fam208b	ENSMUSG00000033799	ENSMUST00000096069	534-542	2382	538	S/G	missense_variant	11031	6.4194	DLALGSAAA	76.6549	56.4969	42.7503
renca_1381	13	3585194	T	C	0/1	Fam208b	ENSMUSG00000033799	ENSMUST00000096069	535-543	2382	538	S/G	missense_variant	11031	6.4194	LALGSAAAS	62.3304	26.1137	25.1736
renca_1382	13	3585194	T	C	0/1	Fam208b	ENSMUSG00000033799	ENSMUST00000096069	536-544	2382	538	S/G	missense_variant	11031	6.4194	ALGSAAASI	21.4872	17.8588	2.9194
renca_1383	13	3585194	T	C	0/1	Fam208b	ENSMUSG00000033799	ENSMUST00000096069	537-545	2382	538	S/G	missense_variant	11031	6.4194	LGSAAASIP	24.0824	57.4938	40.1839
renca_1384	13	3585194	T	C	0/1	Fam208b	ENSMUSG00000033799	ENSMUST00000096069	538-546	2382	538	S/G	missense_variant	11031	6.4194	GSAAASIPS	34.6803	44.2759	21.901
renca_1385	13	3590630	A	C	0/1	Fam208b	ENSMUSG00000033799	ENSMUST00000096069	161-169	2382	169	V/G	missense_variant	11031	6.4194	TAGAKDLKG	61.0714	70.6239	90.6025
renca_1386	13	3590630	A	C	0/1	Fam208b	ENSMUSG00000033799	ENSMUST00000096069	162-170	2382	169	V/G	missense_variant	11031	6.4194	AGAKDLKGE	64.4137	95.0201	90.7624
renca_1387	13	3590630	A	C	0/1	Fam208b	ENSMUSG00000033799	ENSMUST00000096069	163-171	2382	169	V/G	missense_variant	11031	6.4194	GAKDLKGED	95.8096	94.5169	95.0502
renca_1388	13	3590630	A	C	0/1	Fam208b	ENSMUSG00000033799	ENSMUST00000096069	164-172	2382	169	V/G	missense_variant	11031	6.4194	AKDLKGEDG	96.1009	97.0652	96.6185
renca_1389	13	3590630	A	C	0/1	Fam208b	ENSMUSG00000033799	ENSMUST00000096069	165-173	2382	169	V/G	missense_variant	11031	6.4194	KDLKGEDGI	49.6769	38.9128	36.3015
renca_1390	13	3590630	A	C	0/1	Fam208b	ENSMUSG00000033799	ENSMUST00000096069	166-174	2382	169	V/G	missense_variant	11031	6.4194	DLKGEDGIS	97.4166	96.0696	97.1132
renca_1391	13	3590630	A	C	0/1	Fam208b	ENSMUSG00000033799	ENSMUST00000096069	167-175	2382	169	V/G	missense_variant	11031	6.4194	LKGEDGISL	65.2232	25.3176	62.1147
renca_1392	13	3590630	A	C	0/1	Fam208b	ENSMUSG00000033799	ENSMUST00000096069	168-176	2382	169	V/G	missense_variant	11031	6.4194	KGEDGISLK	22.5125	54.5956	63.0057
renca_1393	13	3590630	A	C	0/1	Fam208b	ENSMUSG00000033799	ENSMUST00000096069	169-177	2382	169	V/G	missense_variant	11031	6.4194	GEDGISLKV	64.631	38.306	56.9782
renca_1394	13	19376528	G	C	0/1	Stard3nl	ENSMUSG00000003062	ENSMUST00000039694	18-26	235	26	H/D	missense_variant	2794	3.61599	SHASLRDID	55.3704	51.9492	13.4092
renca_1395	13	19376528	G	C	0/1	Stard3nl	ENSMUSG00000003062	ENSMUST00000039694	19-27	235	26	H/D	missense_variant	2794	3.61599	HASLRDIDS	77.8784	57.5594	89.5024
renca_1396	13	19376528	G	C	0/1	Stard3nl	ENSMUSG00000003062	ENSMUST00000039694	20-28	235	26	H/D	missense_variant	2794	3.61599	ASLRDIDSI	4.5183	16.9365	2.4483
renca_1397	13	19376528	G	C	0/1	Stard3nl	ENSMUSG00000003062	ENSMUST00000039694	21-29	235	26	H/D	missense_variant	2794	3.61599	SLRDIDSIN	95.4581	81.3234	72.903
renca_1398	13	19376528	G	C	0/1	Stard3nl	ENSMUSG00000003062	ENSMUST00000039694	22-30	235	26	H/D	missense_variant	2794	3.61599	LRDIDSINP	94.4062	95.0307	94.8724
renca_1399	13	19376528	G	C	0/1	Stard3nl	ENSMUSG00000003062	ENSMUST00000039694	23-31	235	26	H/D	missense_variant	2794	3.61599	RDIDSINPA	54.6001	33.2992	26.5312
renca_1400	13	19376528	G	C	0/1	Stard3nl	ENSMUSG00000003062	ENSMUST00000039694	24-32	235	26	H/D	missense_variant	2794	3.61599	DIDSINPAQ	95.3556	71.9355	95.8167
renca_1401	13	19376528	G	C	0/1	Stard3nl	ENSMUSG00000003062	ENSMUST00000039694	25-33	235	26	H/D	missense_variant	2794	3.61599	IDSINPAQL	16.3924	6.3238	31.3118
renca_1402	13	19376528	G	C	0/1	Stard3nl	ENSMUSG00000003062	ENSMUST00000039694	26-34	235	26	H/D	missense_variant	2794	3.61599	DSINPAQLM	15.9133	7.1425	23.1139
renca_1403	13	24753418	C	T	0/1	Gmnn	ENSMUSG00000006715	ENSMUST00000006898	122-130	206	130	R/H	missense_variant	5502	27.2189	EQKDSEIAH	97.6176	86.1445	96.4295
renca_1404	13	24753418	C	T	0/1	Gmnn	ENSMUSG00000006715	ENSMUST00000006898	123-131	206	130	R/H	missense_variant	5502	27.2189	QKDSEIAHL	47.895	34.6583	48.3701
renca_1405	13	24753418	C	T	0/1	Gmnn	ENSMUSG00000006715	ENSMUST00000006898	124-132	206	130	R/H	missense_variant	5502	27.2189	KDSEIAHLR	49.6114	43.7213	66.8675
renca_1406	13	24753418	C	T	0/1	Gmnn	ENSMUSG00000006715	ENSMUST00000006898	125-133	206	130	R/H	missense_variant	5502	27.2189	DSEIAHLRK	51.2228	49.2053	81.704
renca_1407	13	24753418	C	T	0/1	Gmnn	ENSMUSG00000006715	ENSMUST00000006898	126-134	206	130	R/H	missense_variant	5502	27.2189	SEIAHLRKE	84.6815	43.3115	60.2357
renca_1408	13	24753418	C	T	0/1	Gmnn	ENSMUSG00000006715	ENSMUST00000006898	127-135	206	130	R/H	missense_variant	5502	27.2189	EIAHLRKEN	97.0106	92.4838	94.9923
renca_1409	13	24753418	C	T	0/1	Gmnn	ENSMUSG00000006715	ENSMUST00000006898	128-136	206	130	R/H	missense_variant	5502	27.2189	IAHLRKENK	32.6799	17.8112	43.7896
renca_1410	13	24753418	C	T	0/1	Gmnn	ENSMUSG00000006715	ENSMUST00000006898	129-137	206	130	R/H	missense_variant	5502	27.2189	AHLRKENKD	92.1615	93.3129	53.687
renca_1411	13	24753418	C	T	0/1	Gmnn	ENSMUSG00000006715	ENSMUST00000006898	130-138	206	130	R/H	missense_variant	5502	27.2189	HLRKENKDL	57.8492	27.1553	53.1161
renca_1412	13	24831807	G	C	0/1	Tdp2	ENSMUSG00000035958	ENSMUST00000038039	18-26	370	26	A/P	missense_variant	5086	11.2175	RAASAPEAP	39.904	51.7875	36.7234
renca_1413	13	24831807	G	C	0/1	Tdp2	ENSMUSG00000035958	ENSMUST00000038039	19-27	370	26	A/P	missense_variant	5086	11.2175	AASAPEAPQ	77.9243	60.618	74.865
renca_1414	13	24831807	G	C	0/1	Tdp2	ENSMUSG00000035958	ENSMUST00000038039	20-28	370	26	A/P	missense_variant	5086	11.2175	ASAPEAPQA	33.3313	40.8004	35.5713
renca_1415	13	24831807	G	C	0/1	Tdp2	ENSMUSG00000035958	ENSMUST00000038039	21-29	370	26	A/P	missense_variant	5086	11.2175	SAPEAPQAE	29.568	45.3167	66.9898
renca_1416	13	24831807	G	C	0/1	Tdp2	ENSMUSG00000035958	ENSMUST00000038039	22-30	370	26	A/P	missense_variant	5086	11.2175	APEAPQAEE	93.6817	25.8116	95.3957
renca_1417	13	24831807	G	C	0/1	Tdp2	ENSMUSG00000035958	ENSMUST00000038039	23-31	370	26	A/P	missense_variant	5086	11.2175	PEAPQAEED	97.5468	97.5254	97.4098
renca_1418	13	24831807	G	C	0/1	Tdp2	ENSMUSG00000035958	ENSMUST00000038039	24-32	370	26	A/P	missense_variant	5086	11.2175	EAPQAEEDR	72.6992	90.328	95.2612
renca_1419	13	24831807	G	C	0/1	Tdp2	ENSMUSG00000035958	ENSMUST00000038039	25-33	370	26	A/P	missense_variant	5086	11.2175	APQAEEDRV	62.7917	5.7691	53.1356
renca_1420	13	24831807	G	C	0/1	Tdp2	ENSMUSG00000035958	ENSMUST00000038039	26-34	370	26	A/P	missense_variant	5086	11.2175	PQAEEDRVK	96.4296	96.8155	93.6474
renca_1421	13	43421227	G	C	0/1	Ranbp9	ENSMUSG00000038546	ENSMUST00000144326	414-422	710	422	L/V	missense_variant	10196	14.4046	SLLERNPNV	19.5756	9.2664	7.9282
renca_1422	13	43421227	G	C	0/1	Ranbp9	ENSMUSG00000038546	ENSMUST00000144326	415-423	710	422	L/V	missense_variant	10196	14.4046	LLERNPNVL	11.4701	14.8142	11.2251
renca_1423	13	43421227	G	C	0/1	Ranbp9	ENSMUSG00000038546	ENSMUST00000144326	416-424	710	422	L/V	missense_variant	10196	14.4046	LERNPNVLF	41.8907	5.7992	61.349
renca_1424	13	43421227	G	C	0/1	Ranbp9	ENSMUSG00000038546	ENSMUST00000144326	417-425	710	422	L/V	missense_variant	10196	14.4046	ERNPNVLFT	78.5467	35.226	41.7784
renca_1425	13	43421227	G	C	0/1	Ranbp9	ENSMUSG00000038546	ENSMUST00000144326	418-426	710	422	L/V	missense_variant	10196	14.4046	RNPNVLFTL	0.018	2.7425	5.6031
renca_1426	13	43421227	G	C	0/1	Ranbp9	ENSMUSG00000038546	ENSMUST00000144326	419-427	710	422	L/V	missense_variant	10196	14.4046	NPNVLFTLK	38.3011	2.4977	43.3344
renca_1427	13	43421227	G	C	0/1	Ranbp9	ENSMUSG00000038546	ENSMUST00000144326	420-428	710	422	L/V	missense_variant	10196	14.4046	PNVLFTLKV	27.6735	45.4881	46.7099
renca_1428	13	43421227	G	C	0/1	Ranbp9	ENSMUSG00000038546	ENSMUST00000144326	421-429	710	422	L/V	missense_variant	10196	14.4046	NVLFTLKVR	88.4578	53.6893	68.0157
renca_1429	13	43421227	G	C	0/1	Ranbp9	ENSMUSG00000038546	ENSMUST00000144326	422-430	710	422	L/V	missense_variant	10196	14.4046	VLFTLKVRQ	77.6061	48.7323	77.3819
renca_1430	13	48489797	G	A	0/1	Zfp169	ENSMUSG00000050954	ENSMUST00000110110	610-618	731	618	T/M	missense_variant	202	0.182611	LARHQRIHM	32.6719	3.1709	27.0846
renca_1431	13	48489797	G	A	0/1	Zfp169	ENSMUSG00000050954	ENSMUST00000110110	611-619	731	618	T/M	missense_variant	202	0.182611	ARHQRIHMG	64.5179	48.4798	52.2988
renca_1432	13	48489797	G	A	0/1	Zfp169	ENSMUSG00000050954	ENSMUST00000110110	612-620	731	618	T/M	missense_variant	202	0.182611	RHQRIHMGE	40.7163	25.2839	18.3987
renca_1433	13	48489797	G	A	0/1	Zfp169	ENSMUSG00000050954	ENSMUST00000110110	613-621	731	618	T/M	missense_variant	202	0.182611	HQRIHMGEK	62.0476	34.8187	38.6588
renca_1434	13	48489797	G	A	0/1	Zfp169	ENSMUSG00000050954	ENSMUST00000110110	614-622	731	618	T/M	missense_variant	202	0.182611	QRIHMGEKP	94.2488	87.0426	44.7697
renca_1435	13	48489797	G	A	0/1	Zfp169	ENSMUSG00000050954	ENSMUST00000110110	615-623	731	618	T/M	missense_variant	202	0.182611	RIHMGEKPF	18.0602	7.4459	21.5965
renca_1436	13	48489797	G	A	0/1	Zfp169	ENSMUSG00000050954	ENSMUST00000110110	616-624	731	618	T/M	missense_variant	202	0.182611	IHMGEKPFL	7.6709	1.7176	0.9829
renca_1437	13	48489797	G	A	0/1	Zfp169	ENSMUSG00000050954	ENSMUST00000110110	617-625	731	618	T/M	missense_variant	202	0.182611	HMGEKPFLC	22.1167	23.7836	40.5236
renca_1438	13	48489797	G	A	0/1	Zfp169	ENSMUSG00000050954	ENSMUST00000110110	618-626	731	618	T/M	missense_variant	202	0.182611	MGEKPFLCA	9.5618	17.0807	54.5099
renca_1439	13	56451144	G	A	0/1	Slc25a48	ENSMUSG00000021509	ENSMUST00000021971	88-96	306	96	E/K	missense_variant	1031	2.21463	SKYRCGELK	44.1529	32.9054	27.5195
renca_1440	13	56451144	G	A	0/1	Slc25a48	ENSMUSG00000021509	ENSMUST00000021971	89-97	306	96	E/K	missense_variant	1031	2.21463	KYRCGELKA	67.3092	35.5494	2.828
renca_1441	13	56451144	G	A	0/1	Slc25a48	ENSMUSG00000021509	ENSMUST00000021971	90-98	306	96	E/K	missense_variant	1031	2.21463	YRCGELKAG	92.601	94.0627	75.244
renca_1442	13	56451144	G	A	0/1	Slc25a48	ENSMUSG00000021509	ENSMUST00000021971	91-99	306	96	E/K	missense_variant	1031	2.21463	RCGELKAGP	91.7191	92.6063	91.8091
renca_1443	13	56451144	G	A	0/1	Slc25a48	ENSMUSG00000021509	ENSMUST00000021971	92-100	306	96	E/K	missense_variant	1031	2.21463	CGELKAGPG	21.582	48.4874	59.7868
renca_1444	13	56451144	G	A	0/1	Slc25a48	ENSMUSG00000021509	ENSMUST00000021971	93-101	306	96	E/K	missense_variant	1031	2.21463	GELKAGPGR	96.4125	65.3657	79.359
renca_1445	13	56451144	G	A	0/1	Slc25a48	ENSMUSG00000021509	ENSMUST00000021971	94-102	306	96	E/K	missense_variant	1031	2.21463	ELKAGPGRS	96.8039	91.031	93.8119
renca_1446	13	56451144	G	A	0/1	Slc25a48	ENSMUSG00000021509	ENSMUST00000021971	95-103	306	96	E/K	missense_variant	1031	2.21463	LKAGPGRSL	49.8952	13.7526	25.15
renca_1447	13	56451144	G	A	0/1	Slc25a48	ENSMUSG00000021509	ENSMUST00000021971	96-104	306	96	E/K	missense_variant	1031	2.21463	KAGPGRSLS	46.9792	32.0972	30.8806
renca_1448	13	63853711	G	C	0/1	Ercc6l2	ENSMUSG00000021470	ENSMUST00000021925	529-537	589	537	R/S	missense_variant	4571	2.17964	DGSTKSEES	60.3482	63.0442	87.9766
renca_1449	13	63853711	G	C	0/1	Ercc6l2	ENSMUSG00000021470	ENSMUST00000021925	530-538	589	537	R/S	missense_variant	4571	2.17964	GSTKSEESL	15.9587	40.2374	17.5357
renca_1450	13	63853711	G	C	0/1	Ercc6l2	ENSMUSG00000021470	ENSMUST00000021925	531-539	589	537	R/S	missense_variant	4571	2.17964	STKSEESLK	52.2538	57.6875	57.4365
renca_1451	13	63853711	G	C	0/1	Ercc6l2	ENSMUSG00000021470	ENSMUST00000021925	532-540	589	537	R/S	missense_variant	4571	2.17964	TKSEESLKI	47.7505	36.6451	40.4764
renca_1452	13	63853711	G	C	0/1	Ercc6l2	ENSMUSG00000021470	ENSMUST00000021925	533-541	589	537	R/S	missense_variant	4571	2.17964	KSEESLKIV	17.8146	44.4315	21.2364
renca_1453	13	63853711	G	C	0/1	Ercc6l2	ENSMUSG00000021470	ENSMUST00000021925	534-542	589	537	R/S	missense_variant	4571	2.17964	SEESLKIVK	78.773	45.9892	71.8745
renca_1454	13	63853711	G	C	0/1	Ercc6l2	ENSMUSG00000021470	ENSMUST00000021925	535-543	589	537	R/S	missense_variant	4571	2.17964	EESLKIVKE	96.6664	79.7723	96.6841
renca_1455	13	63853711	G	C	0/1	Ercc6l2	ENSMUSG00000021470	ENSMUST00000021925	536-544	589	537	R/S	missense_variant	4571	2.17964	ESLKIVKEF	19.1541	6.1155	28.3884
renca_1456	13	63853711	G	C	0/1	Ercc6l2	ENSMUSG00000021470	ENSMUST00000021925	537-545	589	537	R/S	missense_variant	4571	2.17964	SLKIVKEFN	86.02	58.7781	70.924
renca_1457	13	67542835	G	A	0/1	Zfp748	ENSMUSG00000095432	ENSMUST00000181892	94-102	888	102	T/I	missense_variant	2876	3.68135	SLLLEHQRI	15.4066	16.0232	5.5176
renca_1458	13	67542835	G	A	0/1	Zfp748	ENSMUSG00000095432	ENSMUST00000181892	95-103	888	102	T/I	missense_variant	2876	3.68135	LLLEHQRIN	86.6943	75.8625	74.6122
renca_1459	13	67542835	G	A	0/1	Zfp748	ENSMUSG00000095432	ENSMUST00000181892	96-104	888	102	T/I	missense_variant	2876	3.68135	LLEHQRINP	92.212	91.7952	90.0861
renca_1460	13	67542835	G	A	0/1	Zfp748	ENSMUSG00000095432	ENSMUST00000181892	97-105	888	102	T/I	missense_variant	2876	3.68135	LEHQRINPG	73.3826	32.0908	48.8858
renca_1461	13	67542835	G	A	0/1	Zfp748	ENSMUSG00000095432	ENSMUST00000181892	98-106	888	102	T/I	missense_variant	2876	3.68135	EHQRINPGE	80.9041	45.6985	60.117
renca_1462	13	67542835	G	A	0/1	Zfp748	ENSMUSG00000095432	ENSMUST00000181892	99-107	888	102	T/I	missense_variant	2876	3.68135	HQRINPGEN	92.2268	63.0758	59.1319
renca_1463	13	67542835	G	A	0/1	Zfp748	ENSMUSG00000095432	ENSMUST00000181892	100-108	888	102	T/I	missense_variant	2876	3.68135	QRINPGENA	91.0897	56.0906	40.0352
renca_1464	13	67542835	G	A	0/1	Zfp748	ENSMUSG00000095432	ENSMUST00000181892	101-109	888	102	T/I	missense_variant	2876	3.68135	RINPGENAY	63.1667	28.9573	65.0292
renca_1465	13	67542835	G	A	0/1	Zfp748	ENSMUSG00000095432	ENSMUST00000181892	102-110	888	102	T/I	missense_variant	2876	3.68135	INPGENAYK	8.7873	44.2573	57.6361
renca_1466	13	67592277	A	C	0/1	Zfp729b	ENSMUSG00000058093	ENSMUST00000012873	615-623	1045	623	L/R	missense_variant	1869	2.78429	KAFHYPSRR	25.4003	17.5557	29.6436
renca_1467	13	67592277	A	C	0/1	Zfp729b	ENSMUSG00000058093	ENSMUST00000012873	616-624	1045	623	L/R	missense_variant	1869	2.78429	AFHYPSRRF	22.3025	8.4381	9.6114
renca_1468	13	67592277	A	C	0/1	Zfp729b	ENSMUSG00000058093	ENSMUST00000012873	617-625	1045	623	L/R	missense_variant	1869	2.78429	FHYPSRRFS	39.593	9.6117	2.1684
renca_1469	13	67592277	A	C	0/1	Zfp729b	ENSMUSG00000058093	ENSMUST00000012873	618-626	1045	623	L/R	missense_variant	1869	2.78429	HYPSRRFSH	38.649	33.4363	43.299
renca_1470	13	67592277	A	C	0/1	Zfp729b	ENSMUSG00000058093	ENSMUST00000012873	619-627	1045	623	L/R	missense_variant	1869	2.78429	YPSRRFSHT	25.8092	1.9027	24.9414
renca_1471	13	67592277	A	C	0/1	Zfp729b	ENSMUSG00000058093	ENSMUST00000012873	620-628	1045	623	L/R	missense_variant	1869	2.78429	PSRRFSHTK	29.7454	39.0423	56.8512
renca_1472	13	67592277	A	C	0/1	Zfp729b	ENSMUSG00000058093	ENSMUST00000012873	621-629	1045	623	L/R	missense_variant	1869	2.78429	SRRFSHTKM	40.7496	6.33	9.6971
renca_1473	13	67592277	A	C	0/1	Zfp729b	ENSMUSG00000058093	ENSMUST00000012873	622-630	1045	623	L/R	missense_variant	1869	2.78429	RRFSHTKMH	71.7617	39.6561	64.9816
renca_1474	13	67592277	A	C	0/1	Zfp729b	ENSMUSG00000058093	ENSMUST00000012873	623-631	1045	623	L/R	missense_variant	1869	2.78429	RFSHTKMHT	78.9038	55.3312	10.1575
renca_1475	13	73683925	C	G	0/1	Slc6a19	ENSMUSG00000021565	ENSMUST00000022048	503-511	634	511	V/L	missense_variant	2046	2.96212	FAVVYVYGL	4.3693	1.8053	15.7376
renca_1476	13	73683925	C	G	0/1	Slc6a19	ENSMUSG00000021565	ENSMUST00000022048	504-512	634	511	V/L	missense_variant	2046	2.96212	AVVYVYGLD	72.397	77.338	82.1765
renca_1477	13	73683925	C	G	0/1	Slc6a19	ENSMUSG00000021565	ENSMUST00000022048	505-513	634	511	V/L	missense_variant	2046	2.96212	VVYVYGLDR	50.7698	30.2462	88.8273
renca_1478	13	73683925	C	G	0/1	Slc6a19	ENSMUSG00000021565	ENSMUST00000022048	506-514	634	511	V/L	missense_variant	2046	2.96212	VYVYGLDRF	10.4991	11.3479	1.3073
renca_1479	13	73683925	C	G	0/1	Slc6a19	ENSMUSG00000021565	ENSMUST00000022048	507-515	634	511	V/L	missense_variant	2046	2.96212	YVYGLDRFN	75.2652	48.447	57.0584
renca_1480	13	73683925	C	G	0/1	Slc6a19	ENSMUSG00000021565	ENSMUST00000022048	508-516	634	511	V/L	missense_variant	2046	2.96212	VYGLDRFNK	54.4753	30.6803	21.3948
renca_1481	13	73683925	C	G	0/1	Slc6a19	ENSMUSG00000021565	ENSMUST00000022048	509-517	634	511	V/L	missense_variant	2046	2.96212	YGLDRFNKD	18.5599	29.7774	60.1856
renca_1482	13	73683925	C	G	0/1	Slc6a19	ENSMUSG00000021565	ENSMUST00000022048	510-518	634	511	V/L	missense_variant	2046	2.96212	GLDRFNKDI	44.4991	66.093	40.0894
renca_1483	13	73683925	C	G	0/1	Slc6a19	ENSMUSG00000021565	ENSMUST00000022048	511-519	634	511	V/L	missense_variant	2046	2.96212	LDRFNKDIE	84.0483	66.9515	90.7839
renca_1484	13	74360827	A	C	0/1	Lrrc14b	ENSMUSG00000021579	ENSMUST00000022064	479-487	510	487	L/R	missense_variant	1147	3.01738	DIHETSNER	95.153	65.5405	81.2239
renca_1485	13	74360827	A	C	0/1	Lrrc14b	ENSMUSG00000021579	ENSMUST00000022064	480-488	510	487	L/R	missense_variant	1147	3.01738	IHETSNERG	67.0278	68.4221	47.2107
renca_1486	13	74360827	A	C	0/1	Lrrc14b	ENSMUSG00000021579	ENSMUST00000022064	481-489	510	487	L/R	missense_variant	1147	3.01738	HETSNERGT	96.5525	78.1261	78.7064
renca_1487	13	74360827	A	C	0/1	Lrrc14b	ENSMUSG00000021579	ENSMUST00000022064	482-490	510	487	L/R	missense_variant	1147	3.01738	ETSNERGTF	21.6371	19.9527	50.4288
renca_1488	13	74360827	A	C	0/1	Lrrc14b	ENSMUSG00000021579	ENSMUST00000022064	483-491	510	487	L/R	missense_variant	1147	3.01738	TSNERGTFL	1.824	1.7989	3.8567
renca_1489	13	74360827	A	C	0/1	Lrrc14b	ENSMUSG00000021579	ENSMUST00000022064	484-492	510	487	L/R	missense_variant	1147	3.01738	SNERGTFLL	1.2795	3.2027	8.9085
renca_1490	13	74360827	A	C	0/1	Lrrc14b	ENSMUSG00000021579	ENSMUST00000022064	485-493	510	487	L/R	missense_variant	1147	3.01738	NERGTFLLQ	90.3652	31.8838	89.85
renca_1491	13	74360827	A	C	0/1	Lrrc14b	ENSMUSG00000021579	ENSMUST00000022064	486-494	510	487	L/R	missense_variant	1147	3.01738	ERGTFLLQA	70.1751	47.7349	63.549
renca_1492	13	74360827	A	C	0/1	Lrrc14b	ENSMUSG00000021579	ENSMUST00000022064	487-495	510	487	L/R	missense_variant	1147	3.01738	RGTFLLQAF	0.2716	3.2593	11.652
renca_1493	13	74690715	C	G	0/1	Erap1	ENSMUSG00000021583	ENSMUST00000169114	919-927	930	927	P/A	missense_variant	9586	9.54321	RLWLQKEKA	52.2584	31.4028	38.7873
renca_1494	13	74690715	C	G	0/1	Erap1	ENSMUSG00000021583	ENSMUST00000169114	920-928	930	927	P/A	missense_variant	9586	9.54321	LWLQKEKAE	95.6517	89.1312	73.7167
renca_1495	13	74690715	C	G	0/1	Erap1	ENSMUSG00000021583	ENSMUST00000169114	921-929	930	927	P/A	missense_variant	9586	9.54321	WLQKEKAEL	19.9416	7.6651	12.4661
renca_1496	13	74690715	C	G	0/1	Erap1	ENSMUSG00000021583	ENSMUST00000169114	922-930	930	927	P/A	missense_variant	9586	9.54321	LQKEKAELL	12.4023	7.0868	9.8369
renca_1497	13	76155709	G	C	0/1	Ttc37	ENSMUSG00000033991	ENSMUST00000091466	1241-1249	1563	1249	D/H	missense_variant	11966	7.34821	AMGSSTAEH	72.1257	66.4865	58.8203
renca_1498	13	76155709	G	C	0/1	Ttc37	ENSMUSG00000033991	ENSMUST00000091466	1242-1250	1563	1249	D/H	missense_variant	11966	7.34821	MGSSTAEHK	17.374	26.7549	26.8918
renca_1499	13	76155709	G	C	0/1	Ttc37	ENSMUSG00000033991	ENSMUST00000091466	1243-1251	1563	1249	D/H	missense_variant	11966	7.34821	GSSTAEHKS	67.7199	89.1896	71.749
renca_1500	13	76155709	G	C	0/1	Ttc37	ENSMUSG00000033991	ENSMUST00000091466	1244-1252	1563	1249	D/H	missense_variant	11966	7.34821	SSTAEHKSN	62.7262	85.2673	76.2684
renca_1501	13	76155709	G	C	0/1	Ttc37	ENSMUSG00000033991	ENSMUST00000091466	1245-1253	1563	1249	D/H	missense_variant	11966	7.34821	STAEHKSNT	42.7763	39.9383	29.3453
renca_1502	13	76155709	G	C	0/1	Ttc37	ENSMUSG00000033991	ENSMUST00000091466	1246-1254	1563	1249	D/H	missense_variant	11966	7.34821	TAEHKSNTA	43.2734	34.251	43.6645
renca_1503	13	76155709	G	C	0/1	Ttc37	ENSMUSG00000033991	ENSMUST00000091466	1247-1255	1563	1249	D/H	missense_variant	11966	7.34821	AEHKSNTAL	41.8026	4.9765	9.7299
renca_1504	13	76155709	G	C	0/1	Ttc37	ENSMUSG00000033991	ENSMUST00000091466	1248-1256	1563	1249	D/H	missense_variant	11966	7.34821	EHKSNTALK	64.9762	24.852	16.3375
renca_1505	13	76155709	G	C	0/1	Ttc37	ENSMUSG00000033991	ENSMUST00000091466	1249-1257	1563	1249	D/H	missense_variant	11966	7.34821	HKSNTALKT	94.5012	84.3948	78.6851
renca_1506	13	92349205	C	T	0/1	Msh3	ENSMUSG00000014850	ENSMUST00000022220	196-204	1094	204	A/T	missense_variant	3138	2.02085	DMKQQHKDT	96.1107	81.0705	95.1483
renca_1507	13	92349205	C	T	0/1	Msh3	ENSMUSG00000014850	ENSMUST00000022220	197-205	1094	204	A/T	missense_variant	3138	2.02085	MKQQHKDTV	41.6395	13.5294	11.5977
renca_1508	13	92349205	C	T	0/1	Msh3	ENSMUSG00000014850	ENSMUST00000022220	198-206	1094	204	A/T	missense_variant	3138	2.02085	KQQHKDTVL	14.7156	7.5568	4.1895
renca_1509	13	92349205	C	T	0/1	Msh3	ENSMUSG00000014850	ENSMUST00000022220	199-207	1094	204	A/T	missense_variant	3138	2.02085	QQHKDTVLC	63.6935	49.5547	46.9192
renca_1510	13	92349205	C	T	0/1	Msh3	ENSMUSG00000014850	ENSMUST00000022220	200-208	1094	204	A/T	missense_variant	3138	2.02085	QHKDTVLCV	44.3554	14.9919	6.3742
renca_1511	13	92349205	C	T	0/1	Msh3	ENSMUSG00000014850	ENSMUST00000022220	201-209	1094	204	A/T	missense_variant	3138	2.02085	HKDTVLCVE	83.6969	79.0499	88.2894
renca_1512	13	92349205	C	T	0/1	Msh3	ENSMUSG00000014850	ENSMUST00000022220	202-210	1094	204	A/T	missense_variant	3138	2.02085	KDTVLCVEC	47.5505	66.8323	81.3491
renca_1513	13	92349205	C	T	0/1	Msh3	ENSMUSG00000014850	ENSMUST00000022220	203-211	1094	204	A/T	missense_variant	3138	2.02085	DTVLCVECG	71.7617	71.0611	77.3838
renca_1514	13	92349205	C	T	0/1	Msh3	ENSMUSG00000014850	ENSMUST00000022220	204-212	1094	204	A/T	missense_variant	3138	2.02085	TVLCVECGY	57.6085	28.1752	68.2329
renca_1515	13	92368260	T	C	0/1	Dhfr	ENSMUSG00000021707	ENSMUST00000022218	141-149	187	149	F/L	missense_variant	9442	12.798	QEFESDTFL	35.1093	2.9924	13.6338
renca_1516	13	92368260	T	C	0/1	Dhfr	ENSMUSG00000021707	ENSMUST00000022218	142-150	187	149	F/L	missense_variant	9442	12.798	EFESDTFLP	87.9115	78.2399	72.1065
renca_1517	13	92368260	T	C	0/1	Dhfr	ENSMUSG00000021707	ENSMUST00000022218	143-151	187	149	F/L	missense_variant	9442	12.798	FESDTFLPE	68.2374	30.6511	57.2005
renca_1518	13	92368260	T	C	0/1	Dhfr	ENSMUSG00000021707	ENSMUST00000022218	144-152	187	149	F/L	missense_variant	9442	12.798	ESDTFLPEI	5.8022	9.3885	19.5117
renca_1519	13	92368260	T	C	0/1	Dhfr	ENSMUSG00000021707	ENSMUST00000022218	145-153	187	149	F/L	missense_variant	9442	12.798	SDTFLPEID	79.9823	90.429	93.506
renca_1520	13	92368260	T	C	0/1	Dhfr	ENSMUSG00000021707	ENSMUST00000022218	146-154	187	149	F/L	missense_variant	9442	12.798	DTFLPEIDL	33.9796	11.0546	58.9353
renca_1521	13	92368260	T	C	0/1	Dhfr	ENSMUSG00000021707	ENSMUST00000022218	147-155	187	149	F/L	missense_variant	9442	12.798	TFLPEIDLG	57.2963	57.8937	20.3608
renca_1522	13	92368260	T	C	0/1	Dhfr	ENSMUSG00000021707	ENSMUST00000022218	148-156	187	149	F/L	missense_variant	9442	12.798	FLPEIDLGK	37.3773	62.2051	60.8175
renca_1523	13	92368260	T	C	0/1	Dhfr	ENSMUSG00000021707	ENSMUST00000022218	149-157	187	149	F/L	missense_variant	9442	12.798	LPEIDLGKY	77.6556	16.9631	94.814
renca_1524	13	97131999	C	G	0/1	Nsa2	ENSMUSG00000060739	ENSMUST00000073456	179-187	260	187	E/Q	missense_variant	14506	24.5923	KKAHVTHPQ	88.6653	71.0526	65.1661
renca_1525	13	97131999	C	G	0/1	Nsa2	ENSMUSG00000060739	ENSMUST00000073456	180-188	260	187	E/Q	missense_variant	14506	24.5923	KAHVTHPQL	2.9892	0.9829	3.2553
renca_1526	13	97131999	C	G	0/1	Nsa2	ENSMUSG00000060739	ENSMUST00000073456	181-189	260	187	E/Q	missense_variant	14506	24.5923	AHVTHPQLK	56.6296	29.3004	7.4594
renca_1527	13	97131999	C	G	0/1	Nsa2	ENSMUSG00000060739	ENSMUST00000073456	182-190	260	187	E/Q	missense_variant	14506	24.5923	HVTHPQLKA	80.5747	67.6828	72.4601
renca_1528	13	97131999	C	G	0/1	Nsa2	ENSMUSG00000060739	ENSMUST00000073456	183-191	260	187	E/Q	missense_variant	14506	24.5923	VTHPQLKAT	58.0344	43.8852	52.8293
renca_1529	13	97131999	C	G	0/1	Nsa2	ENSMUSG00000060739	ENSMUST00000073456	184-192	260	187	E/Q	missense_variant	14506	24.5923	THPQLKATF	1.1708	2.5974	1.6651
renca_1530	13	97131999	C	G	0/1	Nsa2	ENSMUSG00000060739	ENSMUST00000073456	185-193	260	187	E/Q	missense_variant	14506	24.5923	HPQLKATFC	32.8077	1.7381	53.8026
renca_1531	13	97131999	C	G	0/1	Nsa2	ENSMUSG00000060739	ENSMUST00000073456	186-194	260	187	E/Q	missense_variant	14506	24.5923	PQLKATFCL	17.4087	9.9463	8.7106
renca_1532	13	97131999	C	G	0/1	Nsa2	ENSMUSG00000060739	ENSMUST00000073456	187-195	260	187	E/Q	missense_variant	14506	24.5923	QLKATFCLP	52.6791	47.4302	43.278
renca_1533	13	100160808	A	T	0/1	Naip2	ENSMUSG00000078945	ENSMUST00000067975	899-907	1447	907	L/I	missense_variant	3455	5.16717	FSLFISENI	2.1021	3.9902	1.2027
renca_1534	13	100160808	A	T	0/1	Naip2	ENSMUSG00000078945	ENSMUST00000067975	900-908	1447	907	L/I	missense_variant	3455	5.16717	SLFISENIL	14.3696	6.8715	5.0227
renca_1535	13	100160808	A	T	0/1	Naip2	ENSMUSG00000078945	ENSMUST00000067975	901-909	1447	907	L/I	missense_variant	3455	5.16717	LFISENILR	75.6577	55.9438	48.8871
renca_1536	13	100160808	A	T	0/1	Naip2	ENSMUSG00000078945	ENSMUST00000067975	902-910	1447	907	L/I	missense_variant	3455	5.16717	FISENILRI	7.3916	12.3706	4.3329
renca_1537	13	100160808	A	T	0/1	Naip2	ENSMUSG00000078945	ENSMUST00000067975	903-911	1447	907	L/I	missense_variant	3455	5.16717	ISENILRIC	28.4448	53.3854	69.0416
renca_1538	13	100160808	A	T	0/1	Naip2	ENSMUSG00000078945	ENSMUST00000067975	904-912	1447	907	L/I	missense_variant	3455	5.16717	SENILRICL	25.6416	2.2134	20.2533
renca_1539	13	100160808	A	T	0/1	Naip2	ENSMUSG00000078945	ENSMUST00000067975	905-913	1447	907	L/I	missense_variant	3455	5.16717	ENILRICLN	52.7277	56.4719	67.605
renca_1540	13	100160808	A	T	0/1	Naip2	ENSMUSG00000078945	ENSMUST00000067975	906-914	1447	907	L/I	missense_variant	3455	5.16717	NILRICLNF	15.0886	5.0663	29.3486
renca_1541	13	100160808	A	T	0/1	Naip2	ENSMUSG00000078945	ENSMUST00000067975	907-915	1447	907	L/I	missense_variant	3455	5.16717	ILRICLNFA	44.0516	30.9253	37.5636
renca_1542	13	104242808	T	G	0/1	Cenpk	ENSMUSG00000021714	ENSMUST00000022227	207-215	306	215	L/R	missense_variant	2348	3.25313	KEFKEKLLR	71.4457	35.3748	74.3175
renca_1543	13	104242808	T	G	0/1	Cenpk	ENSMUSG00000021714	ENSMUST00000022227	208-216	306	215	L/R	missense_variant	2348	3.25313	EFKEKLLRT	89.3326	59.1656	64.445
renca_1544	13	104242808	T	G	0/1	Cenpk	ENSMUSG00000021714	ENSMUST00000022227	209-217	306	215	L/R	missense_variant	2348	3.25313	FKEKLLRTL	25.3097	14.5096	13.7343
renca_1545	13	104242808	T	G	0/1	Cenpk	ENSMUSG00000021714	ENSMUST00000022227	210-218	306	215	L/R	missense_variant	2348	3.25313	KEKLLRTLG	71.9712	32.9514	52.7569
renca_1546	13	104242808	T	G	0/1	Cenpk	ENSMUSG00000021714	ENSMUST00000022227	211-219	306	215	L/R	missense_variant	2348	3.25313	EKLLRTLGA	80.9407	48.154	76.6964
renca_1547	13	104242808	T	G	0/1	Cenpk	ENSMUSG00000021714	ENSMUST00000022227	212-220	306	215	L/R	missense_variant	2348	3.25313	KLLRTLGAF	8.0538	8.0101	4.3757
renca_1548	13	104242808	T	G	0/1	Cenpk	ENSMUSG00000021714	ENSMUST00000022227	213-221	306	215	L/R	missense_variant	2348	3.25313	LLRTLGAFL	16.5613	3.0331	12.8663
renca_1549	13	104242808	T	G	0/1	Cenpk	ENSMUSG00000021714	ENSMUST00000022227	214-222	306	215	L/R	missense_variant	2348	3.25313	LRTLGAFLD	75.3713	57.3781	76.8067
renca_1550	13	104242808	T	G	0/1	Cenpk	ENSMUSG00000021714	ENSMUST00000022227	215-223	306	215	L/R	missense_variant	2348	3.25313	RTLGAFLDN	36.2988	42.241	53.3222
renca_1551	13	104806714	G	C	0/1	Cwc27	ENSMUSG00000021715	ENSMUST00000022228	99-107	469	107	H/D	missense_variant	2352	5.93321	VAMANAGPD	40.8669	23.2295	18.6719
renca_1552	13	104806714	G	C	0/1	Cwc27	ENSMUSG00000021715	ENSMUST00000022228	100-108	469	107	H/D	missense_variant	2352	5.93321	AMANAGPDD	86.4246	88.1704	61.6316
renca_1553	13	104806714	G	C	0/1	Cwc27	ENSMUSG00000021715	ENSMUST00000022228	101-109	469	107	H/D	missense_variant	2352	5.93321	MANAGPDDN	88.0602	67.5358	84.926
renca_1554	13	104806714	G	C	0/1	Cwc27	ENSMUSG00000021715	ENSMUST00000022228	102-110	469	107	H/D	missense_variant	2352	5.93321	ANAGPDDNG	72.8537	95.1312	87.3582
renca_1555	13	104806714	G	C	0/1	Cwc27	ENSMUSG00000021715	ENSMUST00000022228	103-111	469	107	H/D	missense_variant	2352	5.93321	NAGPDDNGS	95.3922	89.9332	95.3086
renca_1556	13	104806714	G	C	0/1	Cwc27	ENSMUSG00000021715	ENSMUST00000022228	104-112	469	107	H/D	missense_variant	2352	5.93321	AGPDDNGSQ	46.5898	95.0942	96.6051
renca_1557	13	104806714	G	C	0/1	Cwc27	ENSMUSG00000021715	ENSMUST00000022228	105-113	469	107	H/D	missense_variant	2352	5.93321	GPDDNGSQF	38.0272	1.5348	44.0799
renca_1558	13	104806714	G	C	0/1	Cwc27	ENSMUSG00000021715	ENSMUST00000022228	106-114	469	107	H/D	missense_variant	2352	5.93321	PDDNGSQFF	46.4764	60.4951	94.2868
renca_1559	13	104806714	G	C	0/1	Cwc27	ENSMUSG00000021715	ENSMUST00000022228	107-115	469	107	H/D	missense_variant	2352	5.93321	DDNGSQFFF	21.83	6.9161	71.2719
renca_1560	14	12122046	A	C	0/1	Ptprg	ENSMUSG00000021745	ENSMUST00000022264	295-303	1442	303	R/S	missense_variant	15890	10.4608	HVKSVEYLS	81.2482	44.9772	63.656
renca_1561	14	12122046	A	C	0/1	Ptprg	ENSMUSG00000021745	ENSMUST00000022264	296-304	1442	303	R/S	missense_variant	15890	10.4608	VKSVEYLSN	85.3976	87.335	94.1208
renca_1562	14	12122046	A	C	0/1	Ptprg	ENSMUSG00000021745	ENSMUST00000022264	297-305	1442	303	R/S	missense_variant	15890	10.4608	KSVEYLSNN	30.9266	56.1312	40.6141
renca_1563	14	12122046	A	C	0/1	Ptprg	ENSMUSG00000021745	ENSMUST00000022264	298-306	1442	303	R/S	missense_variant	15890	10.4608	SVEYLSNNF	13.9929	4.9607	23.0761
renca_1564	14	12122046	A	C	0/1	Ptprg	ENSMUSG00000021745	ENSMUST00000022264	299-307	1442	303	R/S	missense_variant	15890	10.4608	VEYLSNNFR	67.3868	16.4167	50.1615
renca_1565	14	12122046	A	C	0/1	Ptprg	ENSMUSG00000021745	ENSMUST00000022264	300-308	1442	303	R/S	missense_variant	15890	10.4608	EYLSNNFRP	68.5188	33.6759	4.0386
renca_1566	14	12122046	A	C	0/1	Ptprg	ENSMUSG00000021745	ENSMUST00000022264	301-309	1442	303	R/S	missense_variant	15890	10.4608	YLSNNFRPQ	58.664	39.5097	32.7264
renca_1567	14	12122046	A	C	0/1	Ptprg	ENSMUSG00000021745	ENSMUST00000022264	302-310	1442	303	R/S	missense_variant	15890	10.4608	LSNNFRPQQ	54.2395	37.3137	72.1255
renca_1568	14	12122046	A	C	0/1	Ptprg	ENSMUSG00000021745	ENSMUST00000022264	303-311	1442	303	R/S	missense_variant	15890	10.4608	SNNFRPQQA	36.769	25.2821	43.0421
renca_1569	14	12225556	G	C	0/1	Ptprg	ENSMUSG00000021745	ENSMUST00000022264	1273-1281	1442	1281	R/S	missense_variant	15890	10.4608	TVTLISKDS	95.5191	82.3216	82.7381
renca_1570	14	12225556	G	C	0/1	Ptprg	ENSMUSG00000021745	ENSMUST00000022264	1274-1282	1442	1281	R/S	missense_variant	15890	10.4608	VTLISKDSL	7.6047	4.1116	5.2357
renca_1571	14	12225556	G	C	0/1	Ptprg	ENSMUSG00000021745	ENSMUST00000022264	1275-1283	1442	1281	R/S	missense_variant	15890	10.4608	TLISKDSLC	44.2799	55.7375	30.8926
renca_1572	14	12225556	G	C	0/1	Ptprg	ENSMUSG00000021745	ENSMUST00000022264	1276-1284	1442	1281	R/S	missense_variant	15890	10.4608	LISKDSLCL	22.7775	19.0804	43.7442
renca_1573	14	12225556	G	C	0/1	Ptprg	ENSMUSG00000021745	ENSMUST00000022264	1277-1285	1442	1281	R/S	missense_variant	15890	10.4608	ISKDSLCLS	28.9731	36.5849	50.1713
renca_1574	14	12225556	G	C	0/1	Ptprg	ENSMUSG00000021745	ENSMUST00000022264	1278-1286	1442	1281	R/S	missense_variant	15890	10.4608	SKDSLCLSN	77.6733	79.9037	70.8764
renca_1575	14	12225556	G	C	0/1	Ptprg	ENSMUSG00000021745	ENSMUST00000022264	1279-1287	1442	1281	R/S	missense_variant	15890	10.4608	KDSLCLSNE	62.4821	73.5696	83.1063
renca_1576	14	12225556	G	C	0/1	Ptprg	ENSMUSG00000021745	ENSMUST00000022264	1280-1288	1442	1281	R/S	missense_variant	15890	10.4608	DSLCLSNEE	66.0802	41.6204	59.6128
renca_1577	14	12225556	G	C	0/1	Ptprg	ENSMUSG00000021745	ENSMUST00000022264	1281-1289	1442	1281	R/S	missense_variant	15890	10.4608	SLCLSNEEQ	81.2335	85.8688	66.9058
renca_1578	14	16383180	C	G	0/1	Top2b	ENSMUSG00000017485	ENSMUST00000017629	48-56	1612	56	P/R	missense_variant	34799	17.259	QLEHILLRR	90.3474	86.8045	94.5527
renca_1579	14	16383180	C	G	0/1	Top2b	ENSMUSG00000017485	ENSMUST00000017629	49-57	1612	56	P/R	missense_variant	34799	17.259	LEHILLRRD	94.0618	74.4907	85.7629
renca_1580	14	16383180	C	G	0/1	Top2b	ENSMUSG00000017485	ENSMUST00000017629	50-58	1612	56	P/R	missense_variant	34799	17.259	EHILLRRDT	83.2504	36.9815	21.2104
renca_1581	14	16383180	C	G	0/1	Top2b	ENSMUSG00000017485	ENSMUST00000017629	51-59	1612	56	P/R	missense_variant	34799	17.259	HILLRRDTY	40.6688	14.6437	50.0306
renca_1582	14	16383180	C	G	0/1	Top2b	ENSMUSG00000017485	ENSMUST00000017629	52-60	1612	56	P/R	missense_variant	34799	17.259	ILLRRDTYI	5.4099	5.6621	2.4637
renca_1583	14	16383180	C	G	0/1	Top2b	ENSMUSG00000017485	ENSMUST00000017629	53-61	1612	56	P/R	missense_variant	34799	17.259	LLRRDTYIG	68.0304	54.0184	73.0304
renca_1584	14	16383180	C	G	0/1	Top2b	ENSMUSG00000017485	ENSMUST00000017629	54-62	1612	56	P/R	missense_variant	34799	17.259	LRRDTYIGS	92.6247	70.7767	83.4004
renca_1585	14	16383180	C	G	0/1	Top2b	ENSMUSG00000017485	ENSMUST00000017629	55-63	1612	56	P/R	missense_variant	34799	17.259	RRDTYIGSV	26.9192	24.0499	17.3338
renca_1586	14	16383180	C	G	0/1	Top2b	ENSMUSG00000017485	ENSMUST00000017629	56-64	1612	56	P/R	missense_variant	34799	17.259	RDTYIGSVE	75.3536	62.9705	82.2657
renca_1587	14	31010964	A	G	0/1	Glt8d1	ENSMUSG00000021916	ENSMUST00000022476	241-249	371	249	N/S	missense_variant	3524	7.66742	FNPGVFVAS	7.7525	32.1931	43.3699
renca_1588	14	31010964	A	G	0/1	Glt8d1	ENSMUSG00000021916	ENSMUST00000022476	242-250	371	249	N/S	missense_variant	3524	7.66742	NPGVFVASL	15.0821	0.0959	25.7731
renca_1589	14	31010964	A	G	0/1	Glt8d1	ENSMUSG00000021916	ENSMUST00000022476	243-251	371	249	N/S	missense_variant	3524	7.66742	PGVFVASLT	48.7557	60.2774	51.792
renca_1590	14	31010964	A	G	0/1	Glt8d1	ENSMUSG00000021916	ENSMUST00000022476	244-252	371	249	N/S	missense_variant	3524	7.66742	GVFVASLTE	64.5595	55.9031	62.3153
renca_1591	14	31010964	A	G	0/1	Glt8d1	ENSMUSG00000021916	ENSMUST00000022476	245-253	371	249	N/S	missense_variant	3524	7.66742	VFVASLTEW	9.6305	11.317	2.3373
renca_1592	14	31010964	A	G	0/1	Glt8d1	ENSMUSG00000021916	ENSMUST00000022476	246-254	371	249	N/S	missense_variant	3524	7.66742	FVASLTEWK	33.8691	29.0537	20.8075
renca_1593	14	31010964	A	G	0/1	Glt8d1	ENSMUSG00000021916	ENSMUST00000022476	247-255	371	249	N/S	missense_variant	3524	7.66742	VASLTEWKR	53.8719	43.0164	73.1198
renca_1594	14	31010964	A	G	0/1	Glt8d1	ENSMUSG00000021916	ENSMUST00000022476	248-256	371	249	N/S	missense_variant	3524	7.66742	ASLTEWKRQ	67.7361	66.3672	78.8749
renca_1595	14	31010964	A	G	0/1	Glt8d1	ENSMUSG00000021916	ENSMUST00000022476	249-257	371	249	N/S	missense_variant	3524	7.66742	SLTEWKRQN	95.0643	83.7263	75.9373
renca_1596	14	34425122	G	C	0/1	Bmpr1a	ENSMUSG00000021796	ENSMUST00000049005	223-231	532	231	A/G	missense_variant	23188	26.4612	PLLVQRTIG	93.4086	87.5815	75.1336
renca_1597	14	34425122	G	C	0/1	Bmpr1a	ENSMUSG00000021796	ENSMUST00000049005	224-232	532	231	A/G	missense_variant	23188	26.4612	LLVQRTIGK	61.6696	56.4625	72.8308
renca_1598	14	34425122	G	C	0/1	Bmpr1a	ENSMUSG00000021796	ENSMUST00000049005	225-233	532	231	A/G	missense_variant	23188	26.4612	LVQRTIGKQ	90.7452	79.9212	87.4515
renca_1599	14	34425122	G	C	0/1	Bmpr1a	ENSMUSG00000021796	ENSMUST00000049005	226-234	532	231	A/G	missense_variant	23188	26.4612	VQRTIGKQI	34.0235	6.7654	4.1484
renca_1600	14	34425122	G	C	0/1	Bmpr1a	ENSMUSG00000021796	ENSMUST00000049005	227-235	532	231	A/G	missense_variant	23188	26.4612	QRTIGKQIQ	97.2335	92.6063	94.1608
renca_1601	14	34425122	G	C	0/1	Bmpr1a	ENSMUSG00000021796	ENSMUST00000049005	228-236	532	231	A/G	missense_variant	23188	26.4612	RTIGKQIQM	8.6299	4.5876	14.6791
renca_1602	14	34425122	G	C	0/1	Bmpr1a	ENSMUSG00000021796	ENSMUST00000049005	229-237	532	231	A/G	missense_variant	23188	26.4612	TIGKQIQMV	38.7292	37.2598	35.4721
renca_1603	14	34425122	G	C	0/1	Bmpr1a	ENSMUSG00000021796	ENSMUST00000049005	230-238	532	231	A/G	missense_variant	23188	26.4612	IGKQIQMVR	28.5005	28.3187	59.7943
renca_1604	14	34425122	G	C	0/1	Bmpr1a	ENSMUSG00000021796	ENSMUST00000049005	231-239	532	231	A/G	missense_variant	23188	26.4612	GKQIQMVRQ	96.8959	96.4389	96.4922
renca_1605	14	45620747	G	A	0/1	Ddhd1	ENSMUSG00000037697	ENSMUST00000051310	345-353	856	353	A/V	missense_variant	4269	2.19804	SDATTSKIV	47.7842	33.1717	25.7258
renca_1606	14	45620747	G	A	0/1	Ddhd1	ENSMUSG00000037697	ENSMUST00000051310	346-354	856	353	A/V	missense_variant	4269	2.19804	DATTSKIVR	88.0705	55.9313	83.1499
renca_1607	14	45620747	G	A	0/1	Ddhd1	ENSMUSG00000037697	ENSMUST00000051310	347-355	856	353	A/V	missense_variant	4269	2.19804	ATTSKIVRT	52.1822	66.4308	54.1465
renca_1608	14	45620747	G	A	0/1	Ddhd1	ENSMUSG00000037697	ENSMUST00000051310	348-356	856	353	A/V	missense_variant	4269	2.19804	TTSKIVRTV	13.6082	21.2006	7.7808
renca_1609	14	45620747	G	A	0/1	Ddhd1	ENSMUSG00000037697	ENSMUST00000051310	349-357	856	353	A/V	missense_variant	4269	2.19804	TSKIVRTVT	49.7271	28.9693	33.2415
renca_1610	14	45620747	G	A	0/1	Ddhd1	ENSMUSG00000037697	ENSMUST00000051310	350-358	856	353	A/V	missense_variant	4269	2.19804	SKIVRTVTQ	80.9883	55.4031	71.6882
renca_1611	14	45620747	G	A	0/1	Ddhd1	ENSMUSG00000037697	ENSMUST00000051310	351-359	856	353	A/V	missense_variant	4269	2.19804	KIVRTVTQK	54.5492	54.1746	25.0901
renca_1612	14	45620747	G	A	0/1	Ddhd1	ENSMUSG00000037697	ENSMUST00000051310	352-360	856	353	A/V	missense_variant	4269	2.19804	IVRTVTQKL	24.2159	3.6186	14.729
renca_1613	14	45620747	G	A	0/1	Ddhd1	ENSMUSG00000037697	ENSMUST00000051310	353-361	856	353	A/V	missense_variant	4269	2.19804	VRTVTQKLG	82.9209	80.4743	71.2548
renca_1614	14	54664949	G	C	0/1	Acin1	ENSMUSG00000022185	ENSMUST00000022793	454-462	1338	462	A/G	missense_variant	14992	10.3215	SPPNTDAGG	56.3439	38.1556	92.5392
renca_1615	14	54664949	G	C	0/1	Acin1	ENSMUSG00000022185	ENSMUST00000022793	455-463	1338	462	A/G	missense_variant	14992	10.3215	PPNTDAGGR	97.7136	90.2523	97.6701
renca_1616	14	54664949	G	C	0/1	Acin1	ENSMUSG00000022185	ENSMUST00000022793	456-464	1338	462	A/G	missense_variant	14992	10.3215	PNTDAGGRE	96.1432	97.4439	97.1964
renca_1617	14	54664949	G	C	0/1	Acin1	ENSMUSG00000022185	ENSMUST00000022793	457-465	1338	462	A/G	missense_variant	14992	10.3215	NTDAGGREP	84.2716	80.3975	78.05
renca_1618	14	54664949	G	C	0/1	Acin1	ENSMUSG00000022185	ENSMUST00000022793	458-466	1338	462	A/G	missense_variant	14992	10.3215	TDAGGREPL	24.6586	6.1137	19.6259
renca_1619	14	54664949	G	C	0/1	Acin1	ENSMUSG00000022185	ENSMUST00000022793	459-467	1338	462	A/G	missense_variant	14992	10.3215	DAGGREPLA	69.434	45.397	88.9041
renca_1620	14	54664949	G	C	0/1	Acin1	ENSMUSG00000022185	ENSMUST00000022793	460-468	1338	462	A/G	missense_variant	14992	10.3215	AGGREPLAS	40.7401	79.8205	84.2239
renca_1621	14	54664949	G	C	0/1	Acin1	ENSMUSG00000022185	ENSMUST00000022793	461-469	1338	462	A/G	missense_variant	14992	10.3215	GGREPLASP	46.0794	65.3339	53.655
renca_1622	14	54664949	G	C	0/1	Acin1	ENSMUSG00000022185	ENSMUST00000022793	462-470	1338	462	A/G	missense_variant	14992	10.3215	GREPLASPH	95.3092	89.3943	79.9342
renca_1623	14	57843208	C	G	0/1	Zdhhc20	ENSMUSG00000021969	ENSMUST00000089473	273-281	368	281	W/C	missense_variant	3610	3.62727	VFGDEKKYC	79.6888	78.704	59.7232
renca_1624	14	57843208	C	G	0/1	Zdhhc20	ENSMUSG00000021969	ENSMUST00000089473	274-282	368	281	W/C	missense_variant	3610	3.62727	FGDEKKYCL	0.8566	4.2028	19.717
renca_1625	14	57843208	C	G	0/1	Zdhhc20	ENSMUSG00000021969	ENSMUST00000089473	275-283	368	281	W/C	missense_variant	3610	3.62727	GDEKKYCLV	25.9863	35.2103	57.3457
renca_1626	14	57843208	C	G	0/1	Zdhhc20	ENSMUSG00000021969	ENSMUST00000089473	276-284	368	281	W/C	missense_variant	3610	3.62727	DEKKYCLVP	89.2462	63.1215	90.2567
renca_1627	14	57843208	C	G	0/1	Zdhhc20	ENSMUSG00000021969	ENSMUST00000089473	277-285	368	281	W/C	missense_variant	3610	3.62727	EKKYCLVPI	46.3327	14.4571	27.9802
renca_1628	14	57843208	C	G	0/1	Zdhhc20	ENSMUSG00000021969	ENSMUST00000089473	278-286	368	281	W/C	missense_variant	3610	3.62727	KKYCLVPIF	12.533	5.1903	14.8179
renca_1629	14	57843208	C	G	0/1	Zdhhc20	ENSMUSG00000021969	ENSMUST00000089473	279-287	368	281	W/C	missense_variant	3610	3.62727	KYCLVPIFS	66.6106	46.9153	5.7966
renca_1630	14	57843208	C	G	0/1	Zdhhc20	ENSMUSG00000021969	ENSMUST00000089473	280-288	368	281	W/C	missense_variant	3610	3.62727	YCLVPIFSS	71.432	43.5348	76.8377
renca_1631	14	57843208	C	G	0/1	Zdhhc20	ENSMUSG00000021969	ENSMUST00000089473	281-289	368	281	W/C	missense_variant	3610	3.62727	CLVPIFSSL	7.762	4.5253	2.1269
renca_1632	14	64210475	C	T	0/1	Msra	ENSMUSG00000054733	ENSMUST00000067927	156-164	233	164	A/T	missense_variant	1080	1.82242	RSAVYPTST	14.9743	25.0573	19.8947
renca_1633	14	64210475	C	T	0/1	Msra	ENSMUSG00000054733	ENSMUST00000067927	157-165	233	164	A/T	missense_variant	1080	1.82242	SAVYPTSTV	10.3787	6.9662	1.4743
renca_1634	14	64210475	C	T	0/1	Msra	ENSMUSG00000054733	ENSMUST00000067927	158-166	233	164	A/T	missense_variant	1080	1.82242	AVYPTSTVQ	78.1153	39.1199	53.2943
renca_1635	14	64210475	C	T	0/1	Msra	ENSMUSG00000054733	ENSMUST00000067927	159-167	233	164	A/T	missense_variant	1080	1.82242	VYPTSTVQM	2.8516	4.9455	0.5694
renca_1636	14	64210475	C	T	0/1	Msra	ENSMUSG00000054733	ENSMUST00000067927	160-168	233	164	A/T	missense_variant	1080	1.82242	YPTSTVQME	84.5754	16.3099	77.134
renca_1637	14	64210475	C	T	0/1	Msra	ENSMUSG00000054733	ENSMUST00000067927	161-169	233	164	A/T	missense_variant	1080	1.82242	PTSTVQMEA	77.4081	71.5323	72.0989
renca_1638	14	64210475	C	T	0/1	Msra	ENSMUSG00000054733	ENSMUST00000067927	162-170	233	164	A/T	missense_variant	1080	1.82242	TSTVQMEAA	33.9304	48.8409	33.5415
renca_1639	14	64210475	C	T	0/1	Msra	ENSMUSG00000054733	ENSMUST00000067927	163-171	233	164	A/T	missense_variant	1080	1.82242	STVQMEAAL	7.257	6.1779	2.3928
renca_1640	14	64210475	C	T	0/1	Msra	ENSMUSG00000054733	ENSMUST00000067927	164-172	233	164	A/T	missense_variant	1080	1.82242	TVQMEAALR	65.249	47.2023	71.9734
renca_1641	14	75707163	T	G	0/1	Cog3	ENSMUSG00000034893	ENSMUST00000049168	787-795	828	795	K/T	missense_variant	5309	7.42083	NNIQQVFQT	47.4178	25.1893	29.6442
renca_1642	14	75707163	T	G	0/1	Cog3	ENSMUSG00000034893	ENSMUST00000049168	788-796	828	795	K/T	missense_variant	5309	7.42083	NIQQVFQTF	9.2485	1.532	14.9358
renca_1643	14	75707163	T	G	0/1	Cog3	ENSMUSG00000034893	ENSMUST00000049168	789-797	828	795	K/T	missense_variant	5309	7.42083	IQQVFQTFH	49.762	26.2951	58.4301
renca_1644	14	75707163	T	G	0/1	Cog3	ENSMUSG00000034893	ENSMUST00000049168	790-798	828	795	K/T	missense_variant	5309	7.42083	QQVFQTFHA	55.7831	25.0965	16.4361
renca_1645	14	75707163	T	G	0/1	Cog3	ENSMUSG00000034893	ENSMUST00000049168	791-799	828	795	K/T	missense_variant	5309	7.42083	QVFQTFHAL	6.6611	0.6065	3.5715
renca_1646	14	75707163	T	G	0/1	Cog3	ENSMUSG00000034893	ENSMUST00000049168	792-800	828	795	K/T	missense_variant	5309	7.42083	VFQTFHALL	1.2391	1.234	1.445
renca_1647	14	75707163	T	G	0/1	Cog3	ENSMUSG00000034893	ENSMUST00000049168	793-801	828	795	K/T	missense_variant	5309	7.42083	FQTFHALLK	22.0976	25.8025	16.1715
renca_1648	14	75707163	T	G	0/1	Cog3	ENSMUSG00000034893	ENSMUST00000049168	794-802	828	795	K/T	missense_variant	5309	7.42083	QTFHALLKE	54.792	62.6334	75.4454
renca_1649	14	75707163	T	G	0/1	Cog3	ENSMUSG00000034893	ENSMUST00000049168	795-803	828	795	K/T	missense_variant	5309	7.42083	TFHALLKEE	88.9039	48.3737	31.7181
renca_1650	14	86985735	A	C	0/1	Diaph3	ENSMUSG00000022021	ENSMUST00000022599	348-356	1171	356	L/V	missense_variant	35196	45.8041	GLKEILPNV	51.1697	33.4224	18.1797
renca_1651	14	86985735	A	C	0/1	Diaph3	ENSMUSG00000022021	ENSMUST00000022599	349-357	1171	356	L/V	missense_variant	35196	45.8041	LKEILPNVK	95.1082	86.3409	89.7128
renca_1652	14	86985735	A	C	0/1	Diaph3	ENSMUSG00000022021	ENSMUST00000022599	350-358	1171	356	L/V	missense_variant	35196	45.8041	KEILPNVKG	92.111	67.1264	84.3662
renca_1653	14	86985735	A	C	0/1	Diaph3	ENSMUSG00000022021	ENSMUST00000022599	351-359	1171	356	L/V	missense_variant	35196	45.8041	EILPNVKGI	59.3201	22.5828	17.0377
renca_1654	14	86985735	A	C	0/1	Diaph3	ENSMUSG00000022021	ENSMUST00000022599	352-360	1171	356	L/V	missense_variant	35196	45.8041	ILPNVKGIK	47.5287	68.2552	59.0895
renca_1655	14	86985735	A	C	0/1	Diaph3	ENSMUSG00000022021	ENSMUST00000022599	353-361	1171	356	L/V	missense_variant	35196	45.8041	LPNVKGIKN	94.2458	22.3888	93.0341
renca_1656	14	86985735	A	C	0/1	Diaph3	ENSMUSG00000022021	ENSMUST00000022599	354-362	1171	356	L/V	missense_variant	35196	45.8041	PNVKGIKND	97.3377	98.4744	96.4252
renca_1657	14	86985735	A	C	0/1	Diaph3	ENSMUSG00000022021	ENSMUST00000022599	355-363	1171	356	L/V	missense_variant	35196	45.8041	NVKGIKNDG	96.5785	76.3923	90.4673
renca_1658	14	86985735	A	C	0/1	Diaph3	ENSMUSG00000022021	ENSMUST00000022599	356-364	1171	356	L/V	missense_variant	35196	45.8041	VKGIKNDGL	43.5363	36.0123	71.4049
renca_1659	14	87511700	A	C	0/1	Tdrd3	ENSMUSG00000022019	ENSMUST00000168275	674-682	743	682	K/T	missense_variant	2254	2.69036	SSGMTAVVT	30.5957	45.5249	34.0734
renca_1660	14	87511700	A	C	0/1	Tdrd3	ENSMUSG00000022019	ENSMUST00000168275	675-683	743	682	K/T	missense_variant	2254	2.69036	SGMTAVVTF	0.1234	0.3343	1.9266
renca_1661	14	87511700	A	C	0/1	Tdrd3	ENSMUSG00000022019	ENSMUST00000168275	676-684	743	682	K/T	missense_variant	2254	2.69036	GMTAVVTFT	67.7555	60.79	13.1275
renca_1662	14	87511700	A	C	0/1	Tdrd3	ENSMUSG00000022019	ENSMUST00000168275	677-685	743	682	K/T	missense_variant	2254	2.69036	MTAVVTFTD	23.6827	33.349	45.8995
renca_1663	14	87511700	A	C	0/1	Tdrd3	ENSMUSG00000022019	ENSMUST00000168275	678-686	743	682	K/T	missense_variant	2254	2.69036	TAVVTFTDY	37.2705	9.5109	33.7963
renca_1664	14	87511700	A	C	0/1	Tdrd3	ENSMUSG00000022019	ENSMUST00000168275	679-687	743	682	K/T	missense_variant	2254	2.69036	AVVTFTDYG	41.3263	43.5492	21.7298
renca_1665	14	87511700	A	C	0/1	Tdrd3	ENSMUSG00000022019	ENSMUST00000168275	680-688	743	682	K/T	missense_variant	2254	2.69036	VVTFTDYGN	88.316	80.9304	91.703
renca_1666	14	87511700	A	C	0/1	Tdrd3	ENSMUSG00000022019	ENSMUST00000168275	681-689	743	682	K/T	missense_variant	2254	2.69036	VTFTDYGNY	22.301	14.8859	53.8081
renca_1667	14	87511700	A	C	0/1	Tdrd3	ENSMUSG00000022019	ENSMUST00000168275	682-690	743	682	K/T	missense_variant	2254	2.69036	TFTDYGNYE	77.4081	51.319	45.8431
renca_1668	14	121797583	C	G	0/1	Dock9	ENSMUSG00000025558	ENSMUST00000100299	2019-03-11	2058	11	E/D	missense_variant	10584	5.79143	QQQLPVSTD	81.1384	68.1876	51.274
renca_1669	14	121797583	C	G	0/1	Dock9	ENSMUSG00000025558	ENSMUST00000100299	2019-04-12	2058	11	E/D	missense_variant	10584	5.79143	QQLPVSTDT	92.9691	48.9646	26.5931
renca_1670	14	121797583	C	G	0/1	Dock9	ENSMUSG00000025558	ENSMUST00000100299	2019-05-13	2058	11	E/D	missense_variant	10584	5.79143	QLPVSTDTR	45.1506	71.8718	59.9289
renca_1671	14	121797583	C	G	0/1	Dock9	ENSMUSG00000025558	ENSMUST00000100299	2019-06-14	2058	11	E/D	missense_variant	10584	5.79143	LPVSTDTRK	89.2427	24.9148	72.9354
renca_1672	14	121797583	C	G	0/1	Dock9	ENSMUSG00000025558	ENSMUST00000100299	2019-07-15	2058	11	E/D	missense_variant	10584	5.79143	PVSTDTRKF	61.6815	69.1415	85.558
renca_1673	14	121797583	C	G	0/1	Dock9	ENSMUSG00000025558	ENSMUST00000100299	2019-08-16	2058	11	E/D	missense_variant	10584	5.79143	VSTDTRKFT	53.6061	56.375	55.85
renca_1674	14	121797583	C	G	0/1	Dock9	ENSMUSG00000025558	ENSMUST00000100299	2019-09-17	2058	11	E/D	missense_variant	10584	5.79143	STDTRKFTR	27.5227	29.8695	53.7469
renca_1675	14	121797583	C	G	0/1	Dock9	ENSMUSG00000025558	ENSMUST00000100299	2019-10-18	2058	11	E/D	missense_variant	10584	5.79143	TDTRKFTRA	34.6382	35.216	53.2192
renca_1676	14	121797583	C	G	0/1	Dock9	ENSMUSG00000025558	ENSMUST00000100299	2019-11-19	2058	11	E/D	missense_variant	10584	5.79143	DTRKFTRAL	14.4218	3.3963	31.0979
renca_1677	15	27553761	G	A	0/1	Ank	ENSMUSG00000022265	ENSMUST00000022875	121-129	492	129	R/Q	missense_variant	17009	34.1476	DESVGSKTQ	97.4679	87.995	96.6558
renca_1678	15	27553761	G	A	0/1	Ank	ENSMUSG00000022265	ENSMUST00000022875	122-130	492	129	R/Q	missense_variant	17009	34.1476	ESVGSKTQR	81.702	65.9698	56.0662
renca_1679	15	27553761	G	A	0/1	Ank	ENSMUSG00000022265	ENSMUST00000022875	123-131	492	129	R/Q	missense_variant	17009	34.1476	SVGSKTQRA	49.441	37.031	39.1875
renca_1680	15	27553761	G	A	0/1	Ank	ENSMUSG00000022265	ENSMUST00000022875	124-132	492	129	R/Q	missense_variant	17009	34.1476	VGSKTQRAF	1.7125	4.3848	19.2453
renca_1681	15	27553761	G	A	0/1	Ank	ENSMUSG00000022265	ENSMUST00000022875	125-133	492	129	R/Q	missense_variant	17009	34.1476	GSKTQRAFL	7.6507	5.8077	8.9562
renca_1682	15	27553761	G	A	0/1	Ank	ENSMUSG00000022265	ENSMUST00000022875	126-134	492	129	R/Q	missense_variant	17009	34.1476	SKTQRAFLY	37.8488	16.4542	64.786
renca_1683	15	27553761	G	A	0/1	Ank	ENSMUSG00000022265	ENSMUST00000022875	127-135	492	129	R/Q	missense_variant	17009	34.1476	KTQRAFLYL	0.0941	0.9602	1.9528
renca_1684	15	27553761	G	A	0/1	Ank	ENSMUSG00000022265	ENSMUST00000022875	128-136	492	129	R/Q	missense_variant	17009	34.1476	TQRAFLYLA	28.8766	7.5455	21.2629
renca_1685	15	27553761	G	A	0/1	Ank	ENSMUSG00000022265	ENSMUST00000022875	129-137	492	129	R/Q	missense_variant	17009	34.1476	QRAFLYLAA	43.5208	21.1839	31.8937
renca_1686	15	41789083	G	C	0/1	Oxr1	ENSMUSG00000022307	ENSMUST00000170127	2019-09-17	832	17	G/A	missense_variant	43782	44.4661	GKSGRLLRA	82.899	89.4236	77.0256
renca_1687	15	41789083	G	C	0/1	Oxr1	ENSMUSG00000022307	ENSMUST00000170127	2019-10-18	832	17	G/A	missense_variant	43782	44.4661	KSGRLLRAT	22.6006	50.3012	29.1537
renca_1688	15	41789083	G	C	0/1	Oxr1	ENSMUSG00000022307	ENSMUST00000170127	2019-11-19	832	17	G/A	missense_variant	43782	44.4661	SGRLLRATA	15.5503	5.5381	11.2287
renca_1689	15	41789083	G	C	0/1	Oxr1	ENSMUSG00000022307	ENSMUST00000170127	2019-12-20	832	17	G/A	missense_variant	43782	44.4661	GRLLRATAS	82.5915	58.2063	33.1993
renca_1690	15	41789083	G	C	0/1	Oxr1	ENSMUSG00000022307	ENSMUST00000170127	13-21	832	17	G/A	missense_variant	43782	44.4661	RLLRATASR	43.9014	27.0212	23.2917
renca_1691	15	41789083	G	C	0/1	Oxr1	ENSMUSG00000022307	ENSMUST00000170127	14-22	832	17	G/A	missense_variant	43782	44.4661	LLRATASRL	22.1542	5.9519	8.2945
renca_1692	15	41789083	G	C	0/1	Oxr1	ENSMUSG00000022307	ENSMUST00000170127	15-23	832	17	G/A	missense_variant	43782	44.4661	LRATASRLW	12.1487	15.6683	16.9222
renca_1693	15	41789083	G	C	0/1	Oxr1	ENSMUSG00000022307	ENSMUST00000170127	16-24	832	17	G/A	missense_variant	43782	44.4661	RATASRLWG	19.8418	19.7544	24.5576
renca_1694	15	41789083	G	C	0/1	Oxr1	ENSMUSG00000022307	ENSMUST00000170127	17-25	832	17	G/A	missense_variant	43782	44.4661	ATASRLWGL	1.9452	3.3749	8.0295
renca_1695	15	76001964	C	G	0/1	Fam83h	ENSMUSG00000046761	ENSMUST00000060807	1167-1175	1209	1175	A/P	missense_variant	5239	8.20611	EVFCKKDEP	77.6803	62.514	63.6777
renca_1696	15	76001964	C	G	0/1	Fam83h	ENSMUSG00000046761	ENSMUST00000060807	1168-1176	1209	1175	A/P	missense_variant	5239	8.20611	VFCKKDEPG	77.4505	80.131	40.6804
renca_1697	15	76001964	C	G	0/1	Fam83h	ENSMUSG00000046761	ENSMUST00000060807	1169-1177	1209	1175	A/P	missense_variant	5239	8.20611	FCKKDEPGS	97.201	96.0527	96.1511
renca_1698	15	76001964	C	G	0/1	Fam83h	ENSMUSG00000046761	ENSMUST00000060807	1170-1178	1209	1175	A/P	missense_variant	5239	8.20611	CKKDEPGSS	96.8617	96.5161	95.1789
renca_1699	15	76001964	C	G	0/1	Fam83h	ENSMUSG00000046761	ENSMUST00000060807	1171-1179	1209	1175	A/P	missense_variant	5239	8.20611	KKDEPGSSG	91.9359	90.8003	82.8292
renca_1700	15	76001964	C	G	0/1	Fam83h	ENSMUSG00000046761	ENSMUST00000060807	1172-1180	1209	1175	A/P	missense_variant	5239	8.20611	KDEPGSSGA	90.0386	83.3695	90.2751
renca_1701	15	76001964	C	G	0/1	Fam83h	ENSMUSG00000046761	ENSMUST00000060807	1173-1181	1209	1175	A/P	missense_variant	5239	8.20611	DEPGSSGAG	90.1633	77.1191	95.5798
renca_1702	15	76001964	C	G	0/1	Fam83h	ENSMUSG00000046761	ENSMUST00000060807	1174-1182	1209	1175	A/P	missense_variant	5239	8.20611	EPGSSGAGD	96.9227	76.9221	96.9123
renca_1703	15	76001964	C	G	0/1	Fam83h	ENSMUSG00000046761	ENSMUST00000060807	1175-1183	1209	1175	A/P	missense_variant	5239	8.20611	PGSSGAGDN	92.0724	97.9962	97.5452
renca_1704	15	76172589	C	T	0/1	Plec	ENSMUSG00000022565	ENSMUST00000023226	4397-4405	4543	4405	D/N	missense_variant	67519	27.0162	DTPGRVSLN	43.4637	78.0648	90.1737
renca_1705	15	76172589	C	T	0/1	Plec	ENSMUSG00000022565	ENSMUST00000023226	4398-4406	4543	4405	D/N	missense_variant	67519	27.0162	TPGRVSLNE	83.7591	17.0252	91.8721
renca_1706	15	76172589	C	T	0/1	Plec	ENSMUSG00000022565	ENSMUST00000023226	4399-4407	4543	4405	D/N	missense_variant	67519	27.0162	PGRVSLNEA	52.663	46.2471	46.402
renca_1707	15	76172589	C	T	0/1	Plec	ENSMUSG00000022565	ENSMUST00000023226	4400-4408	4543	4405	D/N	missense_variant	67519	27.0162	GRVSLNEAL	41.5139	19.1186	5.7171
renca_1708	15	76172589	C	T	0/1	Plec	ENSMUSG00000022565	ENSMUST00000023226	4401-4409	4543	4405	D/N	missense_variant	67519	27.0162	RVSLNEALQ	64.9226	68.0922	74.9943
renca_1709	15	76172589	C	T	0/1	Plec	ENSMUSG00000022565	ENSMUST00000023226	4402-4410	4543	4405	D/N	missense_variant	67519	27.0162	VSLNEALQR	45.5699	46.1553	60.3143
renca_1710	15	76172589	C	T	0/1	Plec	ENSMUSG00000022565	ENSMUST00000023226	4403-4411	4543	4405	D/N	missense_variant	67519	27.0162	SLNEALQRG	62.0208	68.9825	32.0479
renca_1711	15	76172589	C	T	0/1	Plec	ENSMUSG00000022565	ENSMUST00000023226	4404-4412	4543	4405	D/N	missense_variant	67519	27.0162	LNEALQRGT	73.4753	77.0753	83.5522
renca_1712	15	76172589	C	T	0/1	Plec	ENSMUSG00000022565	ENSMUST00000023226	4405-4413	4543	4405	D/N	missense_variant	67519	27.0162	NEALQRGTV	42.3487	12.865	18.3071
renca_1713	15	76191474	C	G	0/1	Plec	ENSMUSG00000022565	ENSMUST00000023226	214-222	4543	222	A/P	missense_variant	67519	27.0162	TNLENLDQP	45.6878	58.1313	32.9049
renca_1714	15	76191474	C	G	0/1	Plec	ENSMUSG00000022565	ENSMUST00000023226	215-223	4543	222	A/P	missense_variant	67519	27.0162	NLENLDQPF	33.9556	14.754	37.4773
renca_1715	15	76191474	C	G	0/1	Plec	ENSMUSG00000022565	ENSMUST00000023226	216-224	4543	222	A/P	missense_variant	67519	27.0162	LENLDQPFS	93.3492	50.2705	81.6793
renca_1716	15	76191474	C	G	0/1	Plec	ENSMUSG00000022565	ENSMUST00000023226	217-225	4543	222	A/P	missense_variant	67519	27.0162	ENLDQPFSV	38.1422	8.0114	34.0017
renca_1717	15	76191474	C	G	0/1	Plec	ENSMUSG00000022565	ENSMUST00000023226	218-226	4543	222	A/P	missense_variant	67519	27.0162	NLDQPFSVA	48.5407	42.1355	39.5322
renca_1718	15	76191474	C	G	0/1	Plec	ENSMUSG00000022565	ENSMUST00000023226	219-227	4543	222	A/P	missense_variant	67519	27.0162	LDQPFSVAE	66.4877	39.8677	89.85
renca_1719	15	76191474	C	G	0/1	Plec	ENSMUSG00000022565	ENSMUST00000023226	220-228	4543	222	A/P	missense_variant	67519	27.0162	DQPFSVAER	49.845	48.0354	55.667
renca_1720	15	76191474	C	G	0/1	Plec	ENSMUSG00000022565	ENSMUST00000023226	221-229	4543	222	A/P	missense_variant	67519	27.0162	QPFSVAERD	82.1559	27.1013	86.7581
renca_1721	15	76191474	C	G	0/1	Plec	ENSMUSG00000022565	ENSMUST00000023226	222-230	4543	222	A/P	missense_variant	67519	27.0162	PFSVAERDL	68.936	49.728	30.6592
renca_1722	15	76292461	C	A	0/1	Spatc1	ENSMUSG00000049653	ENSMUST00000074173	463-471	480	471	H/N	missense_variant	432	1.84172	LSCLHQLSN	39.4832	58.1938	71.7757
renca_1723	15	76292461	C	A	0/1	Spatc1	ENSMUSG00000049653	ENSMUST00000074173	464-472	480	471	H/N	missense_variant	432	1.84172	SCLHQLSND	91.5053	89.056	78.7587
renca_1724	15	76292461	C	A	0/1	Spatc1	ENSMUSG00000049653	ENSMUST00000074173	465-473	480	471	H/N	missense_variant	432	1.84172	CLHQLSNDD	89.1943	90.256	67.9354
renca_1725	15	76292461	C	A	0/1	Spatc1	ENSMUSG00000049653	ENSMUST00000074173	466-474	480	471	H/N	missense_variant	432	1.84172	LHQLSNDDG	70.6113	65.6558	44.5546
renca_1726	15	76292461	C	A	0/1	Spatc1	ENSMUSG00000049653	ENSMUST00000074173	467-475	480	471	H/N	missense_variant	432	1.84172	HQLSNDDGK	70.8173	54.9108	22.7467
renca_1727	15	76292461	C	A	0/1	Spatc1	ENSMUSG00000049653	ENSMUST00000074173	468-476	480	471	H/N	missense_variant	432	1.84172	QLSNDDGKP	97.5354	98.1432	96.1047
renca_1728	15	76292461	C	A	0/1	Spatc1	ENSMUSG00000049653	ENSMUST00000074173	469-477	480	471	H/N	missense_variant	432	1.84172	LSNDDGKPM	41.8189	16.7	36.0619
renca_1729	15	76292461	C	A	0/1	Spatc1	ENSMUSG00000049653	ENSMUST00000074173	470-478	480	471	H/N	missense_variant	432	1.84172	SNDDGKPMF	12.8145	11.3933	51.0345
renca_1730	15	76292461	C	A	0/1	Spatc1	ENSMUSG00000049653	ENSMUST00000074173	471-479	480	471	H/N	missense_variant	432	1.84172	NDDGKPMFI	24.0188	18.9965	65.2811
renca_1731	15	76596810	A	C	0/1	Cpsf1	ENSMUSG00000034022	ENSMUST00000071898	1250-1258	1441	1258	F/V	missense_variant	22014	28.3034	PLEVYSVDV	69.6087	78.2356	88.7066
renca_1732	15	76596810	A	C	0/1	Cpsf1	ENSMUSG00000034022	ENSMUST00000071898	1251-1259	1441	1258	F/V	missense_variant	22014	28.3034	LEVYSVDVM	41.8026	12.2882	18.4045
renca_1733	15	76596810	A	C	0/1	Cpsf1	ENSMUSG00000034022	ENSMUST00000071898	1252-1260	1441	1258	F/V	missense_variant	22014	28.3034	EVYSVDVMV	57.6852	22.3326	40.1337
renca_1734	15	76596810	A	C	0/1	Cpsf1	ENSMUSG00000034022	ENSMUST00000071898	1253-1261	1441	1258	F/V	missense_variant	22014	28.3034	VYSVDVMVD	76.1704	79.7373	29.8345
renca_1735	15	76596810	A	C	0/1	Cpsf1	ENSMUSG00000034022	ENSMUST00000071898	1254-1262	1441	1258	F/V	missense_variant	22014	28.3034	YSVDVMVDN	75.541	75.7399	74.9981
renca_1736	15	76596810	A	C	0/1	Cpsf1	ENSMUSG00000034022	ENSMUST00000071898	1255-1263	1441	1258	F/V	missense_variant	22014	28.3034	SVDVMVDNA	44.0258	39.8536	24.2412
renca_1737	15	76596810	A	C	0/1	Cpsf1	ENSMUSG00000034022	ENSMUST00000071898	1256-1264	1441	1258	F/V	missense_variant	22014	28.3034	VDVMVDNAQ	95.0464	81.5989	95.1153
renca_1738	15	76596810	A	C	0/1	Cpsf1	ENSMUSG00000034022	ENSMUST00000071898	1257-1265	1441	1258	F/V	missense_variant	22014	28.3034	DVMVDNAQL	40.5594	5.8358	20.1912
renca_1739	15	76596810	A	C	0/1	Cpsf1	ENSMUSG00000034022	ENSMUST00000071898	1258-1266	1441	1258	F/V	missense_variant	22014	28.3034	VMVDNAQLG	45.7423	49.632	18.4127
renca_1740	15	78405291	G	C	0/1	Tst	ENSMUSG00000044986	ENSMUST00000058659	173-181	297	181	D/E	missense_variant	6923	15.8629	QSKRFQLVE	30.1947	45.8265	78.0964
renca_1741	15	78405291	G	C	0/1	Tst	ENSMUSG00000044986	ENSMUST00000058659	174-182	297	181	D/E	missense_variant	6923	15.8629	SKRFQLVES	83.9678	54.4283	64.1441
renca_1742	15	78405291	G	C	0/1	Tst	ENSMUSG00000044986	ENSMUST00000058659	175-183	297	181	D/E	missense_variant	6923	15.8629	KRFQLVESR	55.1693	36.463	34.3387
renca_1743	15	78405291	G	C	0/1	Tst	ENSMUSG00000044986	ENSMUST00000058659	176-184	297	181	D/E	missense_variant	6923	15.8629	RFQLVESRA	62.8482	35.8698	5.9469
renca_1744	15	78405291	G	C	0/1	Tst	ENSMUSG00000044986	ENSMUST00000058659	177-185	297	181	D/E	missense_variant	6923	15.8629	FQLVESRAQ	82.4268	63.2163	47.0195
renca_1745	15	78405291	G	C	0/1	Tst	ENSMUSG00000044986	ENSMUST00000058659	178-186	297	181	D/E	missense_variant	6923	15.8629	QLVESRAQG	88.9246	68.9905	39.5938
renca_1746	15	78405291	G	C	0/1	Tst	ENSMUSG00000044986	ENSMUST00000058659	179-187	297	181	D/E	missense_variant	6923	15.8629	LVESRAQGR	86.4212	75.8888	92.925
renca_1747	15	78405291	G	C	0/1	Tst	ENSMUSG00000044986	ENSMUST00000058659	180-188	297	181	D/E	missense_variant	6923	15.8629	VESRAQGRY	55.0529	38.9026	80.2372
renca_1748	15	78405291	G	C	0/1	Tst	ENSMUSG00000044986	ENSMUST00000058659	181-189	297	181	D/E	missense_variant	6923	15.8629	ESRAQGRYL	19.1187	3.7763	16.7862
renca_1749	15	78410463	T	G	0/1	Mpst	ENSMUSG00000071711	ENSMUST00000043865	124-132	297	132	F/V	missense_variant	4555	15.4047	SVSLLDGGV	50.2705	39.7848	26.8119
renca_1750	15	78410463	T	G	0/1	Mpst	ENSMUSG00000071711	ENSMUST00000043865	125-133	297	132	F/V	missense_variant	4555	15.4047	VSLLDGGVR	60.7946	52.5488	63.2966
renca_1751	15	78410463	T	G	0/1	Mpst	ENSMUSG00000071711	ENSMUST00000043865	126-134	297	132	F/V	missense_variant	4555	15.4047	SLLDGGVRH	93.2779	66.248	87.8632
renca_1752	15	78410463	T	G	0/1	Mpst	ENSMUSG00000071711	ENSMUST00000043865	127-135	297	132	F/V	missense_variant	4555	15.4047	LLDGGVRHW	26.824	38.7538	41.9809
renca_1753	15	78410463	T	G	0/1	Mpst	ENSMUSG00000071711	ENSMUST00000043865	128-136	297	132	F/V	missense_variant	4555	15.4047	LDGGVRHWL	24.9772	6.2747	48.0477
renca_1754	15	78410463	T	G	0/1	Mpst	ENSMUSG00000071711	ENSMUST00000043865	129-137	297	132	F/V	missense_variant	4555	15.4047	DGGVRHWLN	35.291	39.2152	93.0772
renca_1755	15	78410463	T	G	0/1	Mpst	ENSMUSG00000071711	ENSMUST00000043865	130-138	297	132	F/V	missense_variant	4555	15.4047	GGVRHWLNQ	27.8626	39.8589	66.8693
renca_1756	15	78410463	T	G	0/1	Mpst	ENSMUSG00000071711	ENSMUST00000043865	131-139	297	132	F/V	missense_variant	4555	15.4047	GVRHWLNQN	95.3247	84.3406	85.719
renca_1757	15	78410463	T	G	0/1	Mpst	ENSMUSG00000071711	ENSMUST00000043865	132-140	297	132	F/V	missense_variant	4555	15.4047	VRHWLNQNL	17.671	4.4285	9.3369
renca_1758	15	78791154	G	A	0/1	Card10	ENSMUSG00000033170	ENSMUST00000164826	459-467	1070	467	R/W	missense_variant	2683	3.92671	KDQYRKQVW	14.6566	25.3476	64.6523
renca_1759	15	78791154	G	A	0/1	Card10	ENSMUSG00000033170	ENSMUST00000164826	460-468	1070	467	R/W	missense_variant	2683	3.92671	DQYRKQVWG	54.0014	34.099	50.3035
renca_1760	15	78791154	G	A	0/1	Card10	ENSMUSG00000033170	ENSMUST00000164826	461-469	1070	467	R/W	missense_variant	2683	3.92671	QYRKQVWGL	26.0681	3.9692	1.2752
renca_1761	15	78791154	G	A	0/1	Card10	ENSMUSG00000033170	ENSMUST00000164826	462-470	1070	467	R/W	missense_variant	2683	3.92671	YRKQVWGLE	76.0573	41.0308	63.2197
renca_1762	15	78791154	G	A	0/1	Card10	ENSMUSG00000033170	ENSMUST00000164826	463-471	1070	467	R/W	missense_variant	2683	3.92671	RKQVWGLEA	61.9673	23.7246	46.2901
renca_1763	15	78791154	G	A	0/1	Card10	ENSMUSG00000033170	ENSMUST00000164826	464-472	1070	467	R/W	missense_variant	2683	3.92671	KQVWGLEAE	59.709	60.8427	28.149
renca_1764	15	78791154	G	A	0/1	Card10	ENSMUSG00000033170	ENSMUST00000164826	465-473	1070	467	R/W	missense_variant	2683	3.92671	QVWGLEAER	79.4413	50.9983	72.0304
renca_1765	15	78791154	G	A	0/1	Card10	ENSMUSG00000033170	ENSMUST00000164826	466-474	1070	467	R/W	missense_variant	2683	3.92671	VWGLEAERD	86.4972	97.153	88.198
renca_1766	15	78791154	G	A	0/1	Card10	ENSMUSG00000033170	ENSMUST00000164826	467-475	1070	467	R/W	missense_variant	2683	3.92671	WGLEAERDE	76.5735	65.9181	87.4149
renca_1767	15	78990986	C	A	0/1	Triobp	ENSMUSG00000033088	ENSMUST00000109687	84-92	627	92	A/E	missense_variant&splice_region_variant	13368	7.87552	YRDSTAEEE	76.8317	71.3158	68.556
renca_1768	15	78990986	C	A	0/1	Triobp	ENSMUSG00000033088	ENSMUST00000109687	85-93	627	92	A/E	missense_variant&splice_region_variant	13368	7.87552	RDSTAEEED	91.9388	96.6579	96.8257
renca_1769	15	78990986	C	A	0/1	Triobp	ENSMUSG00000033088	ENSMUST00000109687	86-94	627	92	A/E	missense_variant&splice_region_variant	13368	7.87552	DSTAEEEDE	95.5907	97.3223	98.0748
renca_1770	15	78990986	C	A	0/1	Triobp	ENSMUSG00000033088	ENSMUST00000109687	87-95	627	92	A/E	missense_variant&splice_region_variant	13368	7.87552	STAEEEDEL	12.6242	23.8803	18.703
renca_1771	15	78990986	C	A	0/1	Triobp	ENSMUSG00000033088	ENSMUST00000109687	88-96	627	92	A/E	missense_variant&splice_region_variant	13368	7.87552	TAEEEDELD	90.2732	96.8324	97.639
renca_1772	15	78990986	C	A	0/1	Triobp	ENSMUSG00000033088	ENSMUST00000109687	89-97	627	92	A/E	missense_variant&splice_region_variant	13368	7.87552	AEEEDELDG	97.6729	96.7584	97.6275
renca_1773	15	78990986	C	A	0/1	Triobp	ENSMUSG00000033088	ENSMUST00000109687	90-98	627	92	A/E	missense_variant&splice_region_variant	13368	7.87552	EEEDELDGE	97.5004	97.0736	98.0806
renca_1774	15	78990986	C	A	0/1	Triobp	ENSMUSG00000033088	ENSMUST00000109687	91-99	627	92	A/E	missense_variant&splice_region_variant	13368	7.87552	EEDELDGEI	62.8155	34.2483	63.0475
renca_1775	15	78990986	C	A	0/1	Triobp	ENSMUSG00000033088	ENSMUST00000109687	92-100	627	92	A/E	missense_variant&splice_region_variant	13368	7.87552	EDELDGEID	97.0439	97.7285	98.4528
renca_1776	15	79543818	T	G	0/1	Ddx17	ENSMUSG00000055065	ENSMUST00000054014	22-30	652	30	K/T	missense_variant	20850	19.7711	GGSGLPPKT	68.412	83.7398	83.3093
renca_1777	15	79543818	T	G	0/1	Ddx17	ENSMUSG00000055065	ENSMUST00000054014	23-31	652	30	K/T	missense_variant	20850	19.7711	GSGLPPKTF	14.8378	30.923	48.5609
renca_1778	15	79543818	T	G	0/1	Ddx17	ENSMUSG00000055065	ENSMUST00000054014	24-32	652	30	K/T	missense_variant	20850	19.7711	SGLPPKTFG	16.7829	17.391	26.4724
renca_1779	15	79543818	T	G	0/1	Ddx17	ENSMUSG00000055065	ENSMUST00000054014	25-33	652	30	K/T	missense_variant	20850	19.7711	GLPPKTFGN	56.8651	86.1278	83.0379
renca_1780	15	79543818	T	G	0/1	Ddx17	ENSMUSG00000055065	ENSMUST00000054014	26-34	652	30	K/T	missense_variant	20850	19.7711	LPPKTFGNP	27.8216	15.498	61.65
renca_1781	15	79543818	T	G	0/1	Ddx17	ENSMUSG00000055065	ENSMUST00000054014	27-35	652	30	K/T	missense_variant	20850	19.7711	PPKTFGNPG	90.5493	26.7461	89.8262
renca_1782	15	79543818	T	G	0/1	Ddx17	ENSMUSG00000055065	ENSMUST00000054014	28-36	652	30	K/T	missense_variant	20850	19.7711	PKTFGNPGE	98.0407	98.048	98.0734
renca_1783	15	79543818	T	G	0/1	Ddx17	ENSMUSG00000055065	ENSMUST00000054014	29-37	652	30	K/T	missense_variant	20850	19.7711	KTFGNPGER	40.3534	33.9266	31.884
renca_1784	15	79543818	T	G	0/1	Ddx17	ENSMUSG00000055065	ENSMUST00000054014	30-38	652	30	K/T	missense_variant	20850	19.7711	TFGNPGERL	22.1395	11.6011	5.1079
renca_1785	15	81006457	C	T	0/1	Sgsm3	ENSMUSG00000042303	ENSMUST00000137255	63-71	83	71	P/S	missense_variant	4164	6.74081	TGSPLVEDS	41.6525	60.323	71.5437
renca_1786	15	81006457	C	T	0/1	Sgsm3	ENSMUSG00000042303	ENSMUST00000137255	64-72	83	71	P/S	missense_variant	4164	6.74081	GSPLVEDSP	24.062	95.3661	75.3021
renca_1787	15	81006457	C	T	0/1	Sgsm3	ENSMUSG00000042303	ENSMUST00000137255	65-73	83	71	P/S	missense_variant	4164	6.74081	SPLVEDSPQ	92.8741	23.082	90.2997
renca_1788	15	81006457	C	T	0/1	Sgsm3	ENSMUSG00000042303	ENSMUST00000137255	66-74	83	71	P/S	missense_variant	4164	6.74081	PLVEDSPQR	96.2807	96.2262	95.4019
renca_1789	15	81006457	C	T	0/1	Sgsm3	ENSMUSG00000042303	ENSMUST00000137255	67-75	83	71	P/S	missense_variant	4164	6.74081	LVEDSPQRL	41.7455	23.7385	53.7134
renca_1790	15	81006457	C	T	0/1	Sgsm3	ENSMUSG00000042303	ENSMUST00000137255	68-76	83	71	P/S	missense_variant	4164	6.74081	VEDSPQRLR	82.9319	54.4004	92.7375
renca_1791	15	81006457	C	T	0/1	Sgsm3	ENSMUSG00000042303	ENSMUST00000137255	69-77	83	71	P/S	missense_variant	4164	6.74081	EDSPQRLRW	31.092	30.0385	83.3605
renca_1792	15	81006457	C	T	0/1	Sgsm3	ENSMUSG00000042303	ENSMUST00000137255	70-78	83	71	P/S	missense_variant	4164	6.74081	DSPQRLRWQ	46.5709	72.4151	88.9115
renca_1793	15	81006457	C	T	0/1	Sgsm3	ENSMUSG00000042303	ENSMUST00000137255	71-79	83	71	P/S	missense_variant	4164	6.74081	SPQRLRWQA	33.6723	0.3399	23.1179
renca_1794	15	83379112	G	C	0/1	Pacsin2	ENSMUSG00000016664	ENSMUST00000056177	404-412	486	412	A/G	missense_variant	39008	57.602	NNPFSSTDG	30.3809	67.031	69.9489
renca_1795	15	83379112	G	C	0/1	Pacsin2	ENSMUSG00000016664	ENSMUST00000056177	405-413	486	412	A/G	missense_variant	39008	57.602	NPFSSTDGN	83.5761	28.7809	78.6987
renca_1796	15	83379112	G	C	0/1	Pacsin2	ENSMUSG00000016664	ENSMUST00000056177	406-414	486	412	A/G	missense_variant	39008	57.602	PFSSTDGNG	97.0659	97.1265	85.7226
renca_1797	15	83379112	G	C	0/1	Pacsin2	ENSMUSG00000016664	ENSMUST00000056177	407-415	486	412	A/G	missense_variant	39008	57.602	FSSTDGNGD	68.771	92.4441	78.78
renca_1798	15	83379112	G	C	0/1	Pacsin2	ENSMUSG00000016664	ENSMUST00000056177	408-416	486	412	A/G	missense_variant	39008	57.602	SSTDGNGDS	80.2489	87.782	82.112
renca_1799	15	83379112	G	C	0/1	Pacsin2	ENSMUSG00000016664	ENSMUST00000056177	409-417	486	412	A/G	missense_variant	39008	57.602	STDGNGDSN	61.869	82.4074	68.2713
renca_1800	15	83379112	G	C	0/1	Pacsin2	ENSMUSG00000016664	ENSMUST00000056177	410-418	486	412	A/G	missense_variant	39008	57.602	TDGNGDSNP	96.8072	96.7002	96.3324
renca_1801	15	83379112	G	C	0/1	Pacsin2	ENSMUSG00000016664	ENSMUST00000056177	411-419	486	412	A/G	missense_variant	39008	57.602	DGNGDSNPF	12.1225	6.4955	50.5931
renca_1802	15	83379112	G	C	0/1	Pacsin2	ENSMUSG00000016664	ENSMUST00000056177	412-420	486	412	A/G	missense_variant	39008	57.602	GNGDSNPFD	87.3617	96.1141	95.8387
renca_1803	15	86496903	T	G	0/1	Tbc1d22a	ENSMUSG00000051864	ENSMUST00000063414	497-505	516	505	F/V	missense_variant	5657	11.9845	LAEAYRLKV	17.658	6.7884	27.0618
renca_1804	15	86496903	T	G	0/1	Tbc1d22a	ENSMUSG00000051864	ENSMUST00000063414	498-506	516	505	F/V	missense_variant	5657	11.9845	AEAYRLKVA	69.1979	44.3444	54.4305
renca_1805	15	86496903	T	G	0/1	Tbc1d22a	ENSMUSG00000051864	ENSMUST00000063414	499-507	516	505	F/V	missense_variant	5657	11.9845	EAYRLKVAF	7.7116	0.8801	17.9154
renca_1806	15	86496903	T	G	0/1	Tbc1d22a	ENSMUSG00000051864	ENSMUST00000063414	500-508	516	505	F/V	missense_variant	5657	11.9845	AYRLKVAFA	44.825	17.1613	2.3198
renca_1807	15	86496903	T	G	0/1	Tbc1d22a	ENSMUSG00000051864	ENSMUST00000063414	501-509	516	505	F/V	missense_variant	5657	11.9845	YRLKVAFAD	70.4293	33.4114	36.549
renca_1808	15	86496903	T	G	0/1	Tbc1d22a	ENSMUSG00000051864	ENSMUST00000063414	502-510	516	505	F/V	missense_variant	5657	11.9845	RLKVAFADA	48.1649	26.7843	34.3729
renca_1809	15	86496903	T	G	0/1	Tbc1d22a	ENSMUSG00000051864	ENSMUST00000063414	503-511	516	505	F/V	missense_variant	5657	11.9845	LKVAFADAP	81.3653	81.4724	48.8507
renca_1810	15	86496903	T	G	0/1	Tbc1d22a	ENSMUSG00000051864	ENSMUST00000063414	504-512	516	505	F/V	missense_variant	5657	11.9845	KVAFADAPN	62.878	58.5875	46.9668
renca_1811	15	86496903	T	G	0/1	Tbc1d22a	ENSMUSG00000051864	ENSMUST00000063414	505-513	516	505	F/V	missense_variant	5657	11.9845	VAFADAPNH	58.0344	27.3086	82.3567
renca_1812	15	88863234	G	C	0/1	Pim3	ENSMUSG00000035828	ENSMUST00000042818	93-101	326	101	G/A	missense_variant	4376	13.0676	LLRKVGAAA	68.674	28.2344	37.2878
renca_1813	15	88863234	G	C	0/1	Pim3	ENSMUSG00000035828	ENSMUST00000042818	94-102	326	101	G/A	missense_variant	4376	13.0676	LRKVGAAAG	89.5125	62.5562	63.3668
renca_1814	15	88863234	G	C	0/1	Pim3	ENSMUSG00000035828	ENSMUST00000042818	95-103	326	101	G/A	missense_variant	4376	13.0676	RKVGAAAGA	84.8426	63.441	41.3021
renca_1815	15	88863234	G	C	0/1	Pim3	ENSMUSG00000035828	ENSMUST00000042818	96-104	326	101	G/A	missense_variant	4376	13.0676	KVGAAAGAR	75.5481	58.6344	53.1997
renca_1816	15	88863234	G	C	0/1	Pim3	ENSMUSG00000035828	ENSMUST00000042818	97-105	326	101	G/A	missense_variant	4376	13.0676	VGAAAGARG	10.6304	29.4857	34.5486
renca_1817	15	88863234	G	C	0/1	Pim3	ENSMUSG00000035828	ENSMUST00000042818	98-106	326	101	G/A	missense_variant	4376	13.0676	GAAAGARGV	40.5325	27.7146	10.2695
renca_1818	15	88863234	G	C	0/1	Pim3	ENSMUSG00000035828	ENSMUST00000042818	99-107	326	101	G/A	missense_variant	4376	13.0676	AAAGARGVI	12.565	5.6567	2.6524
renca_1819	15	88863234	G	C	0/1	Pim3	ENSMUSG00000035828	ENSMUST00000042818	100-108	326	101	G/A	missense_variant	4376	13.0676	AAGARGVIR	58.7434	39.0317	70.7738
renca_1820	15	88863234	G	C	0/1	Pim3	ENSMUSG00000035828	ENSMUST00000042818	101-109	326	101	G/A	missense_variant	4376	13.0676	AGARGVIRL	0.7665	6.7959	6.8779
renca_1821	15	93503448	C	A	0/1	Prickle1	ENSMUSG00000036158	ENSMUST00000048982	377-385	832	385	G/V	missense_variant	4697	7.83464	DVSLASRQV	60.5655	28.5915	41.9547
renca_1822	15	93503448	C	A	0/1	Prickle1	ENSMUSG00000036158	ENSMUST00000048982	378-386	832	385	G/V	missense_variant	4697	7.83464	VSLASRQVA	27.1739	12.974	7.3264
renca_1823	15	93503448	C	A	0/1	Prickle1	ENSMUSG00000036158	ENSMUST00000048982	379-387	832	385	G/V	missense_variant	4697	7.83464	SLASRQVAG	42.5641	40.759	31.8847
renca_1824	15	93503448	C	A	0/1	Prickle1	ENSMUSG00000036158	ENSMUST00000048982	380-388	832	385	G/V	missense_variant	4697	7.83464	LASRQVAGF	4.6343	7.8896	24.985
renca_1825	15	93503448	C	A	0/1	Prickle1	ENSMUSG00000036158	ENSMUST00000048982	381-389	832	385	G/V	missense_variant	4697	7.83464	ASRQVAGFA	32.2455	22.5047	21.7344
renca_1826	15	93503448	C	A	0/1	Prickle1	ENSMUSG00000036158	ENSMUST00000048982	382-390	832	385	G/V	missense_variant	4697	7.83464	SRQVAGFAN	78.5537	32.7967	42.9057
renca_1827	15	93503448	C	A	0/1	Prickle1	ENSMUSG00000036158	ENSMUST00000048982	383-391	832	385	G/V	missense_variant	4697	7.83464	RQVAGFANE	46.5841	36.1451	20.634
renca_1828	15	93503448	C	A	0/1	Prickle1	ENSMUSG00000036158	ENSMUST00000048982	384-392	832	385	G/V	missense_variant	4697	7.83464	QVAGFANEE	72.5206	56.6969	72.7376
renca_1829	15	93503448	C	A	0/1	Prickle1	ENSMUSG00000036158	ENSMUST00000048982	385-393	832	385	G/V	missense_variant	4697	7.83464	VAGFANEEF	2.4534	2.5663	27.4731
renca_1830	15	93505094	G	T	0/1	Prickle1	ENSMUSG00000036158	ENSMUST00000048982	229-237	832	237	P/H	missense_variant	4697	7.83464	RYIMKDGRH	83.3675	69.1653	39.0635
renca_1831	15	93505094	G	T	0/1	Prickle1	ENSMUSG00000036158	ENSMUST00000048982	230-238	832	237	P/H	missense_variant	4697	7.83464	YIMKDGRHF	17.69	2.8963	6.7565
renca_1832	15	93505094	G	T	0/1	Prickle1	ENSMUSG00000036158	ENSMUST00000048982	231-239	832	237	P/H	missense_variant	4697	7.83464	IMKDGRHFC	38.7973	18.9988	28.2576
renca_1833	15	93505094	G	T	0/1	Prickle1	ENSMUSG00000036158	ENSMUST00000048982	232-240	832	237	P/H	missense_variant	4697	7.83464	MKDGRHFCC	46.8488	32.3222	83.5788
renca_1834	15	93505094	G	T	0/1	Prickle1	ENSMUSG00000036158	ENSMUST00000048982	233-241	832	237	P/H	missense_variant	4697	7.83464	KDGRHFCCG	25.5338	58.8469	79.8354
renca_1835	15	93505094	G	T	0/1	Prickle1	ENSMUSG00000036158	ENSMUST00000048982	234-242	832	237	P/H	missense_variant	4697	7.83464	DGRHFCCGC	19	29.0482	66.0296
renca_1836	15	93505094	G	T	0/1	Prickle1	ENSMUSG00000036158	ENSMUST00000048982	235-243	832	237	P/H	missense_variant	4697	7.83464	GRHFCCGCF	29.2941	20.989	24.8646
renca_1837	15	93505094	G	T	0/1	Prickle1	ENSMUSG00000036158	ENSMUST00000048982	236-244	832	237	P/H	missense_variant	4697	7.83464	RHFCCGCFE	20.4782	12.3227	6.9003
renca_1838	15	93505094	G	T	0/1	Prickle1	ENSMUSG00000036158	ENSMUST00000048982	237-245	832	237	P/H	missense_variant	4697	7.83464	HFCCGCFES	73.2452	44.5685	10.7488
renca_1839	15	97384358	T	G	0/1	Pced1b	ENSMUSG00000044250	ENSMUST00000059433	85-93	433	93	F/V	missense_variant	1655	5.45954	DHHLVRFYV	16.4711	1.218	2.7164
renca_1840	15	97384358	T	G	0/1	Pced1b	ENSMUSG00000044250	ENSMUST00000059433	86-94	433	93	F/V	missense_variant	1655	5.45954	HHLVRFYVL	2.0821	0.5914	1.0662
renca_1841	15	97384358	T	G	0/1	Pced1b	ENSMUSG00000044250	ENSMUST00000059433	87-95	433	93	F/V	missense_variant	1655	5.45954	HLVRFYVLT	38.0197	51.6313	49.75
renca_1842	15	97384358	T	G	0/1	Pced1b	ENSMUSG00000044250	ENSMUST00000059433	88-96	433	93	F/V	missense_variant	1655	5.45954	LVRFYVLTR	45.7604	31.2588	88.2602
renca_1843	15	97384358	T	G	0/1	Pced1b	ENSMUSG00000044250	ENSMUST00000059433	89-97	433	93	F/V	missense_variant	1655	5.45954	VRFYVLTRV	32.3145	13.3427	8.1926
renca_1844	15	97384358	T	G	0/1	Pced1b	ENSMUSG00000044250	ENSMUST00000059433	90-98	433	93	F/V	missense_variant	1655	5.45954	RFYVLTRVY	32.8473	8.9713	25.7577
renca_1845	15	97384358	T	G	0/1	Pced1b	ENSMUSG00000044250	ENSMUST00000059433	91-99	433	93	F/V	missense_variant	1655	5.45954	FYVLTRVYS	68.1856	31.3535	1.2463
renca_1846	15	97384358	T	G	0/1	Pced1b	ENSMUSG00000044250	ENSMUST00000059433	92-100	433	93	F/V	missense_variant	1655	5.45954	YVLTRVYSE	42.6941	16.2429	44.3067
renca_1847	15	97384358	T	G	0/1	Pced1b	ENSMUSG00000044250	ENSMUST00000059433	93-101	433	93	F/V	missense_variant	1655	5.45954	VLTRVYSEY	29.4594	20.3923	46.4895
renca_1848	15	98861089	C	G	0/1	Kmt2d	ENSMUSG00000048154	ENSMUST00000023741	1276-1284	5588	1284	A/P	missense_variant	8109	2.94867	HGGRGRGRP	55.3016	85.6307	76.3575
renca_1849	15	98861089	C	G	0/1	Kmt2d	ENSMUSG00000048154	ENSMUST00000023741	1277-1285	5588	1284	A/P	missense_variant	8109	2.94867	GGRGRGRPR	67.5841	46.8871	73.4981
renca_1850	15	98861089	C	G	0/1	Kmt2d	ENSMUSG00000048154	ENSMUST00000023741	1278-1286	5588	1284	A/P	missense_variant	8109	2.94867	GRGRGRPRL	49.8559	34.6904	27.9642
renca_1851	15	98861089	C	G	0/1	Kmt2d	ENSMUSG00000048154	ENSMUST00000023741	1279-1287	5588	1284	A/P	missense_variant	8109	2.94867	RGRGRPRLK	24.4435	29.2588	65.4016
renca_1852	15	98861089	C	G	0/1	Kmt2d	ENSMUSG00000048154	ENSMUST00000023741	1280-1288	5588	1284	A/P	missense_variant	8109	2.94867	GRGRPRLKS	95.6696	94.2394	87.0929
renca_1853	15	98861089	C	G	0/1	Kmt2d	ENSMUSG00000048154	ENSMUST00000023741	1281-1289	5588	1284	A/P	missense_variant	8109	2.94867	RGRPRLKST	28.1134	29.1053	55.2541
renca_1854	15	98861089	C	G	0/1	Kmt2d	ENSMUSG00000048154	ENSMUST00000023741	1282-1290	5588	1284	A/P	missense_variant	8109	2.94867	GRPRLKSTT	70.6044	89.8747	41.578
renca_1855	15	98861089	C	G	0/1	Kmt2d	ENSMUSG00000048154	ENSMUST00000023741	1283-1291	5588	1284	A/P	missense_variant	8109	2.94867	RPRLKSTTS	56.8598	4.5978	56.1827
renca_1856	15	98861089	C	G	0/1	Kmt2d	ENSMUSG00000048154	ENSMUST00000023741	1284-1292	5588	1284	A/P	missense_variant	8109	2.94867	PRLKSTTSS	96.5321	93.1543	54.3261
renca_1857	15	100484566	C	G	0/1	Csrnp2	ENSMUSG00000044636	ENSMUST00000061457	190-198	534	198	E/Q	missense_variant	4791	7.93663	SGVHRIDAQ	34.5898	56.0125	56.3536
renca_1858	15	100484566	C	G	0/1	Csrnp2	ENSMUSG00000044636	ENSMUST00000061457	191-199	534	198	E/Q	missense_variant	4791	7.93663	GVHRIDAQE	93.5659	82.0912	76.9733
renca_1859	15	100484566	C	G	0/1	Csrnp2	ENSMUSG00000044636	ENSMUST00000061457	192-200	534	198	E/Q	missense_variant	4791	7.93663	VHRIDAQEK	71.1092	39.5097	34.4275
renca_1860	15	100484566	C	G	0/1	Csrnp2	ENSMUSG00000044636	ENSMUST00000061457	193-201	534	198	E/Q	missense_variant	4791	7.93663	HRIDAQEKQ	95.0382	88.6132	82.5351
renca_1861	15	100484566	C	G	0/1	Csrnp2	ENSMUSG00000044636	ENSMUST00000061457	194-202	534	198	E/Q	missense_variant	4791	7.93663	RIDAQEKQE	95.3629	95.401	96.0932
renca_1862	15	100484566	C	G	0/1	Csrnp2	ENSMUSG00000044636	ENSMUST00000061457	195-203	534	198	E/Q	missense_variant	4791	7.93663	IDAQEKQEL	31.6103	14.8056	45.3284
renca_1863	15	100484566	C	G	0/1	Csrnp2	ENSMUSG00000044636	ENSMUST00000061457	196-204	534	198	E/Q	missense_variant	4791	7.93663	DAQEKQELR	74.3407	50.0669	83.7249
renca_1864	15	100484566	C	G	0/1	Csrnp2	ENSMUSG00000044636	ENSMUST00000061457	197-205	534	198	E/Q	missense_variant	4791	7.93663	AQEKQELRA	79.5509	80.1897	66.9569
renca_1865	15	100484566	C	G	0/1	Csrnp2	ENSMUSG00000044636	ENSMUST00000061457	198-206	534	198	E/Q	missense_variant	4791	7.93663	QEKQELRAI	59.0291	21.5844	36.9021
renca_1866	15	100520598	A	T	0/1	Tfcp2	ENSMUSG00000009733	ENSMUST00000009877	220-228	500	228	L/M	missense_variant	3972	3.57027	GNGEYTEHM	20.0671	21.3259	33.3919
renca_1867	15	100520598	A	T	0/1	Tfcp2	ENSMUSG00000009733	ENSMUST00000009877	221-229	500	228	L/M	missense_variant	3972	3.57027	NGEYTEHMH	73.9663	65.7114	95.6894
renca_1868	15	100520598	A	T	0/1	Tfcp2	ENSMUSG00000009733	ENSMUST00000009877	222-230	500	228	L/M	missense_variant	3972	3.57027	GEYTEHMHS	88.5719	52.4568	63.0926
renca_1869	15	100520598	A	T	0/1	Tfcp2	ENSMUSG00000009733	ENSMUST00000009877	223-231	500	228	L/M	missense_variant	3972	3.57027	EYTEHMHSA	58.791	35.4621	3.2275
renca_1870	15	100520598	A	T	0/1	Tfcp2	ENSMUSG00000009733	ENSMUST00000009877	224-232	500	228	L/M	missense_variant	3972	3.57027	YTEHMHSAS	41.6232	40.7212	30.0955
renca_1871	15	100520598	A	T	0/1	Tfcp2	ENSMUSG00000009733	ENSMUST00000009877	225-233	500	228	L/M	missense_variant	3972	3.57027	TEHMHSASC	48.1858	15.7954	40.9337
renca_1872	15	100520598	A	T	0/1	Tfcp2	ENSMUSG00000009733	ENSMUST00000009877	226-234	500	228	L/M	missense_variant	3972	3.57027	EHMHSASCQ	80.8089	37.9069	25.7253
renca_1873	15	100520598	A	T	0/1	Tfcp2	ENSMUSG00000009733	ENSMUST00000009877	227-235	500	228	L/M	missense_variant	3972	3.57027	HMHSASCQI	9.3196	4.0552	0.6172
renca_1874	15	100520598	A	T	0/1	Tfcp2	ENSMUSG00000009733	ENSMUST00000009877	228-236	500	228	L/M	missense_variant	3972	3.57027	MHSASCQIK	34.4721	25.3021	5.161
renca_1875	15	101231929	G	C	0/1	Grasp	ENSMUSG00000000531	ENSMUST00000000543	356-364	392	364	K/N	missense_variant	1579	5.62902	ALCGAGLRN	95.2539	94.1925	78.505
renca_1876	15	101231929	G	C	0/1	Grasp	ENSMUSG00000000531	ENSMUST00000000543	357-365	392	364	K/N	missense_variant	1579	5.62902	LCGAGLRNT	95.1985	86.4703	88.3992
renca_1877	15	101231929	G	C	0/1	Grasp	ENSMUSG00000000531	ENSMUST00000000543	358-366	392	364	K/N	missense_variant	1579	5.62902	CGAGLRNTK	11.1514	23.8295	17.1124
renca_1878	15	101231929	G	C	0/1	Grasp	ENSMUSG00000000531	ENSMUST00000000543	359-367	392	364	K/N	missense_variant	1579	5.62902	GAGLRNTKY	56.4973	37.2059	76.9423
renca_1879	15	101231929	G	C	0/1	Grasp	ENSMUSG00000000531	ENSMUST00000000543	360-368	392	364	K/N	missense_variant	1579	5.62902	AGLRNTKYR	28.0756	25.5878	25.3275
renca_1880	15	101231929	G	C	0/1	Grasp	ENSMUSG00000000531	ENSMUST00000000543	361-369	392	364	K/N	missense_variant	1579	5.62902	GLRNTKYRS	94.6526	75.5867	78.0267
renca_1881	15	101231929	G	C	0/1	Grasp	ENSMUSG00000000531	ENSMUST00000000543	362-370	392	364	K/N	missense_variant	1579	5.62902	LRNTKYRSF	21.1304	10.3264	29.8326
renca_1882	15	101231929	G	C	0/1	Grasp	ENSMUSG00000000531	ENSMUST00000000543	363-371	392	364	K/N	missense_variant	1579	5.62902	RNTKYRSFR	23.5849	23.4705	34.5776
renca_1883	15	101231929	G	C	0/1	Grasp	ENSMUSG00000000531	ENSMUST00000000543	364-372	392	364	K/N	missense_variant	1579	5.62902	NTKYRSFRR	50.1734	33.4958	75.8462
renca_1884	15	102084736	G	A	0/1	Eif4b	ENSMUSG00000058655	ENSMUST00000169681	132-140	611	140	G/S	missense_variant	61327	99.4779	NPDRLKGFS	72.2802	26.1137	82.9639
renca_1885	15	102084736	G	A	0/1	Eif4b	ENSMUSG00000058655	ENSMUST00000169681	133-141	611	140	G/S	missense_variant	61327	99.4779	PDRLKGFSY	83.5029	52.5851	96.6405
renca_1886	15	102084736	G	A	0/1	Eif4b	ENSMUSG00000058655	ENSMUST00000169681	134-142	611	140	G/S	missense_variant	61327	99.4779	DRLKGFSYA	71.772	22.8301	17.1794
renca_1887	15	102084736	G	A	0/1	Eif4b	ENSMUSG00000058655	ENSMUST00000169681	135-143	611	140	G/S	missense_variant	61327	99.4779	RLKGFSYAE	50.1942	28.0241	62.0244
renca_1888	15	102084736	G	A	0/1	Eif4b	ENSMUSG00000058655	ENSMUST00000169681	136-144	611	140	G/S	missense_variant	61327	99.4779	LKGFSYAEF	16.3785	7.0188	38.2599
renca_1889	15	102084736	G	A	0/1	Eif4b	ENSMUSG00000058655	ENSMUST00000169681	137-145	611	140	G/S	missense_variant	61327	99.4779	KGFSYAEFE	2.7015	14.0363	34.3976
renca_1890	15	102084736	G	A	0/1	Eif4b	ENSMUSG00000058655	ENSMUST00000169681	138-146	611	140	G/S	missense_variant	61327	99.4779	GFSYAEFED	86.0028	87.5146	58.0505
renca_1891	15	102084736	G	A	0/1	Eif4b	ENSMUSG00000058655	ENSMUST00000169681	139-147	611	140	G/S	missense_variant	61327	99.4779	FSYAEFEDL	0.742	2.3815	4.6969
renca_1892	15	102084736	G	A	0/1	Eif4b	ENSMUSG00000058655	ENSMUST00000169681	140-148	611	140	G/S	missense_variant	61327	99.4779	SYAEFEDLD	47.5881	67.496	10.1951
renca_1893	15	103155940	G	C	0/1	Smug1	ENSMUSG00000036061	ENSMUST00000064067	177-185	279	185	P/A	missense_variant	2551	3.01065	RNLTPAELA	23.2079	27.6027	20.9107
renca_1894	15	103155940	G	C	0/1	Smug1	ENSMUSG00000036061	ENSMUST00000064067	178-186	279	185	P/A	missense_variant	2551	3.01065	NLTPAELAA	82.8917	50.9147	45.7506
renca_1895	15	103155940	G	C	0/1	Smug1	ENSMUSG00000036061	ENSMUST00000064067	179-187	279	185	P/A	missense_variant	2551	3.01065	LTPAELAAK	11.9897	52.5321	48.3413
renca_1896	15	103155940	G	C	0/1	Smug1	ENSMUSG00000036061	ENSMUST00000064067	180-188	279	185	P/A	missense_variant	2551	3.01065	TPAELAAKQ	89.4087	22.4333	89.6945
renca_1897	15	103155940	G	C	0/1	Smug1	ENSMUSG00000036061	ENSMUST00000064067	181-189	279	185	P/A	missense_variant	2551	3.01065	PAELAAKQR	96.5118	94.5458	95.7172
renca_1898	15	103155940	G	C	0/1	Smug1	ENSMUSG00000036061	ENSMUST00000064067	182-190	279	185	P/A	missense_variant	2551	3.01065	AELAAKQRE	96.1009	68.756	78.3792
renca_1899	15	103155940	G	C	0/1	Smug1	ENSMUSG00000036061	ENSMUST00000064067	183-191	279	185	P/A	missense_variant	2551	3.01065	ELAAKQREQ	95.1489	87.5606	95.4425
renca_1900	15	103155940	G	C	0/1	Smug1	ENSMUSG00000036061	ENSMUST00000064067	184-192	279	185	P/A	missense_variant	2551	3.01065	LAAKQREQL	7.6583	3.1781	7.2127
renca_1901	15	103155940	G	C	0/1	Smug1	ENSMUSG00000036061	ENSMUST00000064067	185-193	279	185	P/A	missense_variant	2551	3.01065	AAKQREQLL	10.5038	5.0089	21.3008
renca_1902	16	3940903	G	A	0/1	Cluap1	ENSMUSG00000014232	ENSMUST00000040881	402-410	413	410	D/N	missense_variant	2806	8.92343	KPEPLDESN	94.7922	57.3375	95.9449
renca_1903	16	3940903	G	A	0/1	Cluap1	ENSMUSG00000014232	ENSMUST00000040881	403-411	413	410	D/N	missense_variant	2806	8.92343	PEPLDESNN	97.6046	98.1993	98.3925
renca_1904	16	3940903	G	A	0/1	Cluap1	ENSMUSG00000014232	ENSMUST00000040881	404-412	413	410	D/N	missense_variant	2806	8.92343	EPLDESNND	97.7624	83.9521	97.4859
renca_1905	16	3940903	G	A	0/1	Cluap1	ENSMUSG00000014232	ENSMUST00000040881	405-413	413	410	D/N	missense_variant	2806	8.92343	PLDESNNDF	49.3384	57.1063	71.5152
renca_1906	16	3986764	C	G	0/1	Slx4	ENSMUSG00000039738	ENSMUST00000040790	721-729	1565	729	E/Q	missense_variant	15213	14.3994	ESSGLEKEQ	95.5199	94.4593	96.6281
renca_1907	16	3986764	C	G	0/1	Slx4	ENSMUSG00000039738	ENSMUST00000040790	722-730	1565	729	E/Q	missense_variant	15213	14.3994	SSGLEKEQA	45.0653	63.8624	56.0859
renca_1908	16	3986764	C	G	0/1	Slx4	ENSMUSG00000039738	ENSMUST00000040790	723-731	1565	729	E/Q	missense_variant	15213	14.3994	SGLEKEQAL	3.4072	2.5459	6.9027
renca_1909	16	3986764	C	G	0/1	Slx4	ENSMUSG00000039738	ENSMUST00000040790	724-732	1565	729	E/Q	missense_variant	15213	14.3994	GLEKEQALA	80.8712	93.6626	73.3897
renca_1910	16	3986764	C	G	0/1	Slx4	ENSMUSG00000039738	ENSMUST00000040790	725-733	1565	729	E/Q	missense_variant	15213	14.3994	LEKEQALAS	95.205	59.3063	80.6793
renca_1911	16	3986764	C	G	0/1	Slx4	ENSMUSG00000039738	ENSMUST00000040790	726-734	1565	729	E/Q	missense_variant	15213	14.3994	EKEQALASW	45.9909	40.3094	72.0171
renca_1912	16	3986764	C	G	0/1	Slx4	ENSMUSG00000039738	ENSMUST00000040790	727-735	1565	729	E/Q	missense_variant	15213	14.3994	KEQALASWE	80.6845	40.3687	59.6189
renca_1913	16	3986764	C	G	0/1	Slx4	ENSMUSG00000039738	ENSMUST00000040790	728-736	1565	729	E/Q	missense_variant	15213	14.3994	EQALASWEQ	81.6837	44.1805	72.8479
renca_1914	16	3986764	C	G	0/1	Slx4	ENSMUSG00000039738	ENSMUST00000040790	729-737	1565	729	E/Q	missense_variant	15213	14.3994	QALASWEQE	46.8015	21.84	49.6654
renca_1915	16	4117488	G	C	0/1	Crebbp	ENSMUSG00000022521	ENSMUST00000023165	876-884	2441	884	P/A	missense_variant	13034	6.97666	APGMTPPQA	80.0696	5.2959	67.8039
renca_1916	16	4117488	G	C	0/1	Crebbp	ENSMUSG00000022521	ENSMUST00000023165	877-885	2441	884	P/A	missense_variant	13034	6.97666	PGMTPPQAA	54.5169	42.9641	42.3326
renca_1917	16	4117488	G	C	0/1	Crebbp	ENSMUSG00000022521	ENSMUST00000023165	878-886	2441	884	P/A	missense_variant	13034	6.97666	GMTPPQAAA	69.2917	58.4094	20.8309
renca_1918	16	4117488	G	C	0/1	Crebbp	ENSMUSG00000022521	ENSMUST00000023165	879-887	2441	884	P/A	missense_variant	13034	6.97666	MTPPQAAAP	14.2019	49.3147	39.1211
renca_1919	16	4117488	G	C	0/1	Crebbp	ENSMUSG00000022521	ENSMUST00000023165	880-888	2441	884	P/A	missense_variant	13034	6.97666	TPPQAAAPT	29.6045	9.5495	44.0329
renca_1920	16	4117488	G	C	0/1	Crebbp	ENSMUSG00000022521	ENSMUST00000023165	881-889	2441	884	P/A	missense_variant	13034	6.97666	PPQAAAPTQ	95.2913	40.6978	95.9147
renca_1921	16	4117488	G	C	0/1	Crebbp	ENSMUSG00000022521	ENSMUST00000023165	882-890	2441	884	P/A	missense_variant	13034	6.97666	PQAAAPTQP	95.8421	95.7861	57.323
renca_1922	16	4117488	G	C	0/1	Crebbp	ENSMUSG00000022521	ENSMUST00000023165	883-891	2441	884	P/A	missense_variant	13034	6.97666	QAAAPTQPS	55.127	30.5391	32.5927
renca_1923	16	4117488	G	C	0/1	Crebbp	ENSMUSG00000022521	ENSMUST00000023165	884-892	2441	884	P/A	missense_variant	13034	6.97666	AAAPTQPST	53.9436	27.5265	32.626
renca_1924	16	4304570	G	A	0/1	Adcy9	ENSMUSG00000005580	ENSMUST00000005719	768-776	1353	776	P/S	missense_variant	3926	5.47502	QEEVIKNSS	96.2758	69.3839	86.8075
renca_1925	16	4304570	G	A	0/1	Adcy9	ENSMUSG00000005580	ENSMUST00000005719	769-777	1353	776	P/S	missense_variant	3926	5.47502	EEVIKNSSV	74.636	25.3185	32.1476
renca_1926	16	4304570	G	A	0/1	Adcy9	ENSMUSG00000005580	ENSMUST00000005719	770-778	1353	776	P/S	missense_variant	3926	5.47502	EVIKNSSVK	74.3647	50.1255	30.1127
renca_1927	16	4304570	G	A	0/1	Adcy9	ENSMUSG00000005580	ENSMUST00000005719	771-779	1353	776	P/S	missense_variant	3926	5.47502	VIKNSSVKT	85.8921	61.3413	72.1483
renca_1928	16	4304570	G	A	0/1	Adcy9	ENSMUSG00000005580	ENSMUST00000005719	772-780	1353	776	P/S	missense_variant	3926	5.47502	IKNSSVKTF	33.6723	12.5891	25.2126
renca_1929	16	4304570	G	A	0/1	Adcy9	ENSMUSG00000005580	ENSMUST00000005719	773-781	1353	776	P/S	missense_variant	3926	5.47502	KNSSVKTFA	29.6907	25.4531	11.7516
renca_1930	16	4304570	G	A	0/1	Adcy9	ENSMUSG00000005580	ENSMUST00000005719	774-782	1353	776	P/S	missense_variant	3926	5.47502	NSSVKTFAS	28.2318	24.9613	44.4548
renca_1931	16	4304570	G	A	0/1	Adcy9	ENSMUSG00000005580	ENSMUST00000005719	775-783	1353	776	P/S	missense_variant	3926	5.47502	SSVKTFASA	7.2371	12.227	3.4792
renca_1932	16	4304570	G	A	0/1	Adcy9	ENSMUSG00000005580	ENSMUST00000005719	776-784	1353	776	P/S	missense_variant	3926	5.47502	SVKTFASAT	50.5224	21.6894	24.0607
renca_1933	16	4418742	G	C	0/1	Adcy9	ENSMUSG00000005580	ENSMUST00000005719	260-268	1353	268	C/W	missense_variant	3926	5.47502	GYHFRNEDW	20.4508	27.7068	8.8777
renca_1934	16	4418742	G	C	0/1	Adcy9	ENSMUSG00000005580	ENSMUST00000005719	261-269	1353	268	C/W	missense_variant	3926	5.47502	YHFRNEDWY	11.7559	6.4463	4.8759
renca_1935	16	4418742	G	C	0/1	Adcy9	ENSMUSG00000005580	ENSMUST00000005719	262-270	1353	268	C/W	missense_variant	3926	5.47502	HFRNEDWYP	73.2727	47.4535	32.5796
renca_1936	16	4418742	G	C	0/1	Adcy9	ENSMUSG00000005580	ENSMUST00000005719	263-271	1353	268	C/W	missense_variant	3926	5.47502	FRNEDWYPS	64.9821	24.1248	29.6207
renca_1937	16	4418742	G	C	0/1	Adcy9	ENSMUSG00000005580	ENSMUST00000005719	264-272	1353	268	C/W	missense_variant	3926	5.47502	RNEDWYPSP	38.5703	63.8237	79.8586
renca_1938	16	4418742	G	C	0/1	Adcy9	ENSMUSG00000005580	ENSMUST00000005719	265-273	1353	268	C/W	missense_variant	3926	5.47502	NEDWYPSPG	68.6578	40.8183	75.6216
renca_1939	16	4418742	G	C	0/1	Adcy9	ENSMUSG00000005580	ENSMUST00000005719	266-274	1353	268	C/W	missense_variant	3926	5.47502	EDWYPSPGP	94.7595	70.798	95.1502
renca_1940	16	4418742	G	C	0/1	Adcy9	ENSMUSG00000005580	ENSMUST00000005719	267-275	1353	268	C/W	missense_variant	3926	5.47502	DWYPSPGPG	77.7687	42.1873	29.3198
renca_1941	16	4418742	G	C	0/1	Adcy9	ENSMUSG00000005580	ENSMUST00000005719	268-276	1353	268	C/W	missense_variant	3926	5.47502	WYPSPGPGA	35.1366	36.2083	6.721
renca_1942	16	4482685	A	C	0/1	Srl	ENSMUSG00000022519	ENSMUST00000023161	833-841	910	841	F/V	missense_variant	1809	2.46211	PNREAYKDV	61.2827	56.8156	73.3384
renca_1943	16	4482685	A	C	0/1	Srl	ENSMUSG00000022519	ENSMUST00000023161	834-842	910	841	F/V	missense_variant	1809	2.46211	NREAYKDVF	28.8945	15.2785	44.4583
renca_1944	16	4482685	A	C	0/1	Srl	ENSMUSG00000022519	ENSMUST00000023161	835-843	910	841	F/V	missense_variant	1809	2.46211	REAYKDVFG	68.9942	50.0809	81.2448
renca_1945	16	4482685	A	C	0/1	Srl	ENSMUSG00000022519	ENSMUST00000023161	836-844	910	841	F/V	missense_variant	1809	2.46211	EAYKDVFGI	16.0618	4.0692	13.1941
renca_1946	16	4482685	A	C	0/1	Srl	ENSMUSG00000022519	ENSMUST00000023161	837-845	910	841	F/V	missense_variant	1809	2.46211	AYKDVFGIN	89.9793	59.3719	23.0751
renca_1947	16	4482685	A	C	0/1	Srl	ENSMUSG00000022519	ENSMUST00000023161	838-846	910	841	F/V	missense_variant	1809	2.46211	YKDVFGINP	77.7793	75.3327	85.3586
renca_1948	16	4482685	A	C	0/1	Srl	ENSMUSG00000022519	ENSMUST00000023161	839-847	910	841	F/V	missense_variant	1809	2.46211	KDVFGINPI	19.3294	10.3291	5.6713
renca_1949	16	4482685	A	C	0/1	Srl	ENSMUSG00000022519	ENSMUST00000023161	840-848	910	841	F/V	missense_variant	1809	2.46211	DVFGINPIS	90.965	44.6266	76.1386
renca_1950	16	4482685	A	C	0/1	Srl	ENSMUSG00000022519	ENSMUST00000023161	841-849	910	841	F/V	missense_variant	1809	2.46211	VFGINPISN	89.6681	67.5199	53.5631
renca_1951	16	5203608	C	G	0/1	Nagpa	ENSMUSG00000023143	ENSMUST00000023911	85-93	517	93	G/A	missense_variant	7523	23.0055	HFEGRAVAA	67.7426	35.7725	25.2154
renca_1952	16	5203608	C	G	0/1	Nagpa	ENSMUSG00000023143	ENSMUST00000023911	86-94	517	93	G/A	missense_variant	7523	23.0055	FEGRAVAAH	87.9426	57.2156	84.1594
renca_1953	16	5203608	C	G	0/1	Nagpa	ENSMUSG00000023143	ENSMUST00000023911	87-95	517	93	G/A	missense_variant	7523	23.0055	EGRAVAAHL	10.4544	1.7484	13.4945
renca_1954	16	5203608	C	G	0/1	Nagpa	ENSMUSG00000023143	ENSMUST00000023911	88-96	517	93	G/A	missense_variant	7523	23.0055	GRAVAAHLT	73.465	55.4062	26.1947
renca_1955	16	5203608	C	G	0/1	Nagpa	ENSMUSG00000023143	ENSMUST00000023911	89-97	517	93	G/A	missense_variant	7523	23.0055	RAVAAHLTR	20.9342	17.3289	20.4753
renca_1956	16	5203608	C	G	0/1	Nagpa	ENSMUSG00000023143	ENSMUST00000023911	90-98	517	93	G/A	missense_variant	7523	23.0055	AVAAHLTRV	15.5668	16.8616	4.2542
renca_1957	16	5203608	C	G	0/1	Nagpa	ENSMUSG00000023143	ENSMUST00000023911	91-99	517	93	G/A	missense_variant	7523	23.0055	VAAHLTRVA	34.0223	20.9986	19.4548
renca_1958	16	5203608	C	G	0/1	Nagpa	ENSMUSG00000023143	ENSMUST00000023911	92-100	517	93	G/A	missense_variant	7523	23.0055	AAHLTRVAD	63.3095	31.4457	41.5891
renca_1959	16	5203608	C	G	0/1	Nagpa	ENSMUSG00000023143	ENSMUST00000023911	93-101	517	93	G/A	missense_variant	7523	23.0055	AHLTRVADP	71.2294	62.1559	11.4181
renca_1960	16	10560047	A	C	0/1	Clec16a	ENSMUSG00000068663	ENSMUST00000038145	28-36	912	36	N/T	missense_variant	3530	3.05732	YLYHVLTKT	63.003	46.7012	30.4808
renca_1961	16	10560047	A	C	0/1	Clec16a	ENSMUSG00000068663	ENSMUST00000038145	29-37	912	36	N/T	missense_variant	3530	3.05732	LYHVLTKTT	77.7369	34.7713	1.39
renca_1962	16	10560047	A	C	0/1	Clec16a	ENSMUSG00000068663	ENSMUST00000038145	30-38	912	36	N/T	missense_variant	3530	3.05732	YHVLTKTTT	53.227	24.5912	1.3191
renca_1963	16	10560047	A	C	0/1	Clec16a	ENSMUSG00000068663	ENSMUST00000038145	31-39	912	36	N/T	missense_variant	3530	3.05732	HVLTKTTTV	22.3231	7.1094	1.7346
renca_1964	16	10560047	A	C	0/1	Clec16a	ENSMUSG00000068663	ENSMUST00000038145	32-40	912	36	N/T	missense_variant	3530	3.05732	VLTKTTTVT	70.4636	70.573	26.8413
renca_1965	16	10560047	A	C	0/1	Clec16a	ENSMUSG00000068663	ENSMUST00000038145	33-41	912	36	N/T	missense_variant	3530	3.05732	LTKTTTVTE	62.2827	50.0641	64.1224
renca_1966	16	10560047	A	C	0/1	Clec16a	ENSMUSG00000068663	ENSMUST00000038145	34-42	912	36	N/T	missense_variant	3530	3.05732	TKTTTVTEQ	96.1587	87.9657	81.241
renca_1967	16	10560047	A	C	0/1	Clec16a	ENSMUSG00000068663	ENSMUST00000038145	35-43	912	36	N/T	missense_variant	3530	3.05732	KTTTVTEQN	65.1682	82.7145	61.3357
renca_1968	16	10560047	A	C	0/1	Clec16a	ENSMUSG00000068663	ENSMUST00000038145	36-44	912	36	N/T	missense_variant	3530	3.05732	TTTVTEQNR	78.4406	74.1553	71.3669
renca_1969	16	14131464	G	A	0/1	Marf1	ENSMUSG00000060657	ENSMUST00000090300	1069-1077	1736	1077	P/L	missense_variant	17136	12.2322	VVKWIHNKL	10.8104	2.7039	16.9792
renca_1970	16	14131464	G	A	0/1	Marf1	ENSMUSG00000060657	ENSMUST00000090300	1070-1078	1736	1077	P/L	missense_variant	17136	12.2322	VKWIHNKLP	84.5608	63.4867	75.6332
renca_1971	16	14131464	G	A	0/1	Marf1	ENSMUSG00000060657	ENSMUST00000090300	1071-1079	1736	1077	P/L	missense_variant	17136	12.2322	KWIHNKLPP	57.2937	49.8213	4.4547
renca_1972	16	14131464	G	A	0/1	Marf1	ENSMUSG00000060657	ENSMUST00000090300	1072-1080	1736	1077	P/L	missense_variant	17136	12.2322	WIHNKLPPP	58.4471	43.6291	36.7096
renca_1973	16	14131464	G	A	0/1	Marf1	ENSMUSG00000060657	ENSMUST00000090300	1073-1081	1736	1077	P/L	missense_variant	17136	12.2322	IHNKLPPPN	76.8989	48.8535	22.5372
renca_1974	16	14131464	G	A	0/1	Marf1	ENSMUSG00000060657	ENSMUST00000090300	1074-1082	1736	1077	P/L	missense_variant	17136	12.2322	HNKLPPPNT	79.3812	47.1256	80.7173
renca_1975	16	14131464	G	A	0/1	Marf1	ENSMUSG00000060657	ENSMUST00000090300	1075-1083	1736	1077	P/L	missense_variant	17136	12.2322	NKLPPPNTD	97.0081	87.2932	88.487
renca_1976	16	14131464	G	A	0/1	Marf1	ENSMUSG00000060657	ENSMUST00000090300	1076-1084	1736	1077	P/L	missense_variant	17136	12.2322	KLPPPNTDP	51.9209	90.2163	59.6189
renca_1977	16	14131464	G	A	0/1	Marf1	ENSMUSG00000060657	ENSMUST00000090300	1077-1085	1736	1077	P/L	missense_variant	17136	12.2322	LPPPNTDPW	1.6706	1.6334	27.7214
renca_1978	16	15629629	A	C	0/1	Mcm4	ENSMUSG00000022673	ENSMUST00000023353	482-490	862	490	D/E	missense_variant	67329	135.962	QLFGGTRKE	90.8759	70.0509	72.5399
renca_1979	16	15629629	A	C	0/1	Mcm4	ENSMUSG00000022673	ENSMUST00000023353	483-491	862	490	D/E	missense_variant	67329	135.962	LFGGTRKEF	36.5823	11.341	11.6941
renca_1980	16	15629629	A	C	0/1	Mcm4	ENSMUSG00000022673	ENSMUST00000023353	484-492	862	490	D/E	missense_variant	67329	135.962	FGGTRKEFS	23.7797	36.4954	50.078
renca_1981	16	15629629	A	C	0/1	Mcm4	ENSMUSG00000022673	ENSMUST00000023353	485-493	862	490	D/E	missense_variant	67329	135.962	GGTRKEFSH	54.8636	79.9168	92.8681
renca_1982	16	15629629	A	C	0/1	Mcm4	ENSMUSG00000022673	ENSMUST00000023353	486-494	862	490	D/E	missense_variant	67329	135.962	GTRKEFSHT	53.8812	53.034	48.9774
renca_1983	16	15629629	A	C	0/1	Mcm4	ENSMUSG00000022673	ENSMUST00000023353	487-495	862	490	D/E	missense_variant	67329	135.962	TRKEFSHTG	65.4043	35.681	46.8605
renca_1984	16	15629629	A	C	0/1	Mcm4	ENSMUSG00000022673	ENSMUST00000023353	488-496	862	490	D/E	missense_variant	67329	135.962	RKEFSHTGR	83.2833	66.4308	78.6522
renca_1985	16	15629629	A	C	0/1	Mcm4	ENSMUSG00000022673	ENSMUST00000023353	489-497	862	490	D/E	missense_variant	67329	135.962	KEFSHTGRG	63.4375	35.9084	52.4213
renca_1986	16	15629629	A	C	0/1	Mcm4	ENSMUSG00000022673	ENSMUST00000023353	490-498	862	490	D/E	missense_variant	67329	135.962	EFSHTGRGK	95.9829	85.0752	73.8175
renca_1987	16	15769921	T	G	0/1	Prkdc	ENSMUSG00000022672	ENSMUST00000023352	2549-2557	4128	2557	F/V	missense_variant	18249	10.0295	HFLSLATNV	43.4844	6.0524	0.1558
renca_1988	16	15769921	T	G	0/1	Prkdc	ENSMUSG00000022672	ENSMUST00000023352	2550-2558	4128	2557	F/V	missense_variant	18249	10.0295	FLSLATNVL	6.9833	6.9197	4.6998
renca_1989	16	15769921	T	G	0/1	Prkdc	ENSMUSG00000022672	ENSMUST00000023352	2551-2559	4128	2557	F/V	missense_variant	18249	10.0295	LSLATNVLL	1.9718	2.4744	4.8412
renca_1990	16	15769921	T	G	0/1	Prkdc	ENSMUSG00000022672	ENSMUST00000023352	2552-2560	4128	2557	F/V	missense_variant	18249	10.0295	SLATNVLLE	46.1267	54.2331	31.2153
renca_1991	16	15769921	T	G	0/1	Prkdc	ENSMUSG00000022672	ENSMUST00000023352	2553-2561	4128	2557	F/V	missense_variant	18249	10.0295	LATNVLLEM	15.5034	2.6862	20.9562
renca_1992	16	15769921	T	G	0/1	Prkdc	ENSMUSG00000022672	ENSMUST00000023352	2554-2562	4128	2557	F/V	missense_variant	18249	10.0295	ATNVLLEMT	54.4521	67.7663	41.7482
renca_1993	16	15769921	T	G	0/1	Prkdc	ENSMUSG00000022672	ENSMUST00000023352	2555-2563	4128	2557	F/V	missense_variant	18249	10.0295	TNVLLEMTR	44.9374	43.4754	46.1805
renca_1994	16	15769921	T	G	0/1	Prkdc	ENSMUSG00000022672	ENSMUST00000023352	2556-2564	4128	2557	F/V	missense_variant	18249	10.0295	NVLLEMTRM	40.8653	11.7294	26.5871
renca_1995	16	15769921	T	G	0/1	Prkdc	ENSMUSG00000022672	ENSMUST00000023352	2557-2565	4128	2557	F/V	missense_variant	18249	10.0295	VLLEMTRMS	73.0254	51.4278	28.853
renca_1996	16	15787175	G	C	0/1	Prkdc	ENSMUSG00000022672	ENSMUST00000023352	2978-2986	4128	2986	E/Q	missense_variant	18249	10.0295	NKLEWVDGQ	96.0415	82.2945	87.7442
renca_1997	16	15787175	G	C	0/1	Prkdc	ENSMUSG00000022672	ENSMUST00000023352	2979-2987	4128	2986	E/Q	missense_variant	18249	10.0295	KLEWVDGQP	88.852	95.2095	75.457
renca_1998	16	15787175	G	C	0/1	Prkdc	ENSMUSG00000022672	ENSMUST00000023352	2980-2988	4128	2986	E/Q	missense_variant	18249	10.0295	LEWVDGQPT	90.8403	29.9693	59.9259
renca_1999	16	15787175	G	C	0/1	Prkdc	ENSMUSG00000022672	ENSMUST00000023352	2981-2989	4128	2986	E/Q	missense_variant	18249	10.0295	EWVDGQPTE	93.459	85.7059	64.9482
[truncated: 2,999 more rows]

## Sheet: S&W binding
name	Chr	Position	Ref_Allele	Alt_Allele	Genotype	Symbol	Ensembl_Gene_ID	Ensembl_transcript_ID	Position_of_peptide	Protein_length	Position	A.A.Change	functional_consequence	RNA-Seq_Raw_count	RNA-Seq_Normalized_count(RPKM)	Peptide	H-2-Dd	H-2-Ld	H-2-Kd
renca_01	8	81001124	T	C	0/1	Usp38	ENSMUSG00000038250	ENSMUST00000042724	326-334	1042	327	R/G	missense_variant	7525	9.50792	VGPGALAVL	0.0084	3.9529	4.8637
renca_02	13	43421227	G	C	0/1	Ranbp9	ENSMUSG00000038546	ENSMUST00000144326	418-426	710	422	L/V	missense_variant	10196	14.4046	RNPNVLFTL	0.018	2.7425	5.6031
renca_03	4	134890378	T	G	0/1	Rhd	ENSMUSG00000028825	ENSMUST00000030627	339-347	418	342	L/R	missense_variant	763	3.46916	LGARTYYCL	0.0371	0.9976	6.0456
renca_04	1	58471071	A	T	0/1	Orc2	ENSMUSG00000026037	ENSMUST00000027198	383-391	576	387	L/H	missense_variant	15715	29.5293	SSLEHFLLI	0.0553	1.045	1.1567		Prediction of peptide-MHC class I binding
renca_05	2	27386535	C	A	0/1	Vav2	ENSMUSG00000009621	ENSMUST00000056176	86-94	868	92	E/D	missense_variant	9010	9.44324	FGLRNSDLF	0.0554	1.1574	2.2591		http://www.cbs.dtu.dk/services/NetMHCpan/
renca_06	16	17575134	G	A	0/1	Slc7a4	ENSMUSG00000022756	ENSMUST00000063544	262-270	635	267	A/V	missense_variant	979	1.70848	KNPRWVVPM	0.0659	3.7195	6.1262
renca_07	11	100770255	G	C	0/1	Ghdc	ENSMUSG00000017747	ENSMUST00000017891	26-34	532	28	A/G	missense_variant	2961	7.97171	RGGRPCWLI	0.0802	6.8042	6.1886		search 9mer peptides for mouse(H-2)
renca_08	2	167644854	C	T	0/1	Tmem189	ENSMUSG00000090213	ENSMUST00000006587	194-202	271	202	V/I	missense_variant	16746	37.172	LGLPYWVTI	0.0925	0.4187	3.4861		Threshold for strong binders: 0.5 % Rank
renca_09	15	27553761	G	A	0/1	Ank	ENSMUSG00000022265	ENSMUST00000022875	127-135	492	129	R/Q	missense_variant	17009	34.1476	KTQRAFLYL	0.0941	0.9602	1.9528		Threshold for weak binders: 2 % Rank
renca_10	14	87511700	A	C	0/1	Tdrd3	ENSMUSG00000022019	ENSMUST00000168275	675-683	743	682	K/T	missense_variant	2254	2.69036	SGMTAVVTF	0.1234	0.3343	1.9266
renca_11	11	71001656	T	G	0/1	Dhx33	ENSMUSG00000040620	ENSMUST00000108527	94-102	698	96	T/P	missense_variant	5887	4.25342	KTPQIPQYL	0.1497	4.7175	3.8896
renca_12	8	94563972	C	G	0/1	Cpne2	ENSMUSG00000034361	ENSMUST00000048653	394-402	548	395	A/G	missense_variant	4311	9.76374	IGQAYSACL	0.1551	0.8548	8.0272
renca_13	19	6122049	C	G	0/1	Snx15	ENSMUSG00000024787	ENSMUST00000025702	115-123	337	121	E/D	missense_variant	2607	8.65121	NSPQLKDFF	0.1567	6.8725	14.6167
renca_14	1	97840283	G	T	0/1	Pam	ENSMUSG00000026335	ENSMUST00000058762	737-745	979	741	P/T	missense_variant	15505	9.44942	ISYITGFLF	0.1851	0.5837	12.8237
renca_15	12	16940511	G	C	0/1	Rock2	ENSMUSG00000020580	ENSMUST00000020904	143-151	1388	145	A/P	missense_variant	39023	20.3511	IMPFANSPW	0.1918	4.9951	3.5103
renca_16	12	82341668	T	G	0/1	Sipa1l1	ENSMUSG00000042700	ENSMUST00000053969	218-226	1782	223	F/V	missense_variant	23585	13.3478	SGDSFVDLL	0.2128	4.0202	8.154
renca_17	5	143253690	C	G	0/1	Zfp316	ENSMUSG00000046658	ENSMUST00000051665	855-863	1017	858	G/A	missense_variant	1529	1.47242	KGFAHSSDF	0.2137	1.0826	4.0972
renca_18	3	27458794	C	G	0/1	Fndc3b	ENSMUSG00000039286	ENSMUST00000046157	725-733	1207	728	E/Q	missense_variant	18286	11.5392	HGPQLECTV	0.2257	13.5766	7.7588
renca_19	1	42905474	A	T	0/1	Mrps9	ENSMUSG00000060679	ENSMUST00000057208	379-387	390	384	K/M	missense_variant	6565	8.25609	EGARRMFTW	0.2491	8.6072	31.2875
renca_20	17	24574136	G	C	0/1	Pkd1	ENSMUSG00000032855	ENSMUST00000035565	1593-1601	4293	1599	G/A	missense_variant	3956	1.64635	YTFRSVATF	0.263	1.3595	2.2003
renca_21	5	43773444	C	G	0/1	Fbxl5	ENSMUSG00000039753	ENSMUST00000141902	47-55	611	53	K/N	missense_variant&splice_region_variant	18985	14.1267	KGLKNVNVF	0.2645	2.1491	3.3921
renca_22	13	74360827	A	C	0/1	Lrrc14b	ENSMUSG00000021579	ENSMUST00000022064	487-495	510	487	L/R	missense_variant	1147	3.01738	RGTFLLQAF	0.2716	3.2593	11.652
renca_23	1	40451750	C	T	0/1	Il1rl1	ENSMUSG00000026069	ENSMUST00000053043	397-405	567	397	A/V	missense_variant	8299	8.72454	VGTHSVEYF	0.2833	4.3986	14.9575
renca_24	18	32265703	G	C	0/1	Ercc3	ENSMUSG00000024382	ENSMUST00000025241	673-681	783	678	Q/H	missense_variant	8542	21.8371	YSTKRHRFL	0.2902	2.0285	5.0392
renca_25	17	24574136	G	C	0/1	Pkd1	ENSMUSG00000032855	ENSMUST00000035565	1596-1604	4293	1599	G/A	missense_variant	3956	1.64635	RSVATFNII	0.3777	5.3766	0.6696
renca_26	11	78348190	T	G	0/1	Unc119	ENSMUSG00000002058	ENSMUST00000002127	173-181	240	181	F/V	missense_variant	1616	4.7843	KSFDFHFGV	0.3887	1.5941	5.5044
renca_27	5	36967234	T	G	0/1	Wfs1	ENSMUSG00000039474	ENSMUST00000043964	764-772	890	771	K/T	missense_variant	1730	3.31085	KHPCHIKTF	0.4059	4.5048	1.649
renca_28	8	70912627	T	G	0/1	Map1s	ENSMUSG00000019261	ENSMUST00000019405	136-144	973	143	F/V	missense_variant	5260	4.78737	GGFSAHHVL	0.4113	0.8035	1.7401
renca_29	10	80930489	C	G	0/1	Gadd45b	ENSMUSG00000015312	ENSMUST00000015456	28-36	160	29	A/G	missense_variant	12153	55.4304	VGAQRQDRL	0.4131	5.2566	14.36
renca_30	8	70914453	C	G	0/1	Map1s	ENSMUSG00000019261	ENSMUST00000019405	659-667	973	667	C/W	missense_variant	5260	4.78737	TSPHDVDLW	0.4272	36.4398	42.0321
renca_31	9	110436108	C	T	0/1	Klhl18	ENSMUSG00000054792	ENSMUST00000068025	342-350	574	342	G/R	missense_variant	939	0.969293	RGYDGQLRL	0.4439	1.7075	5.8052
renca_32	1	65268845	A	T	0/1	Pikfyve	ENSMUSG00000025949	ENSMUST00000081154	1812-1820	2052	1815	K/M	missense_variant	15431	5.82147	RGGMSGAAF	0.4607	2.1784	10.7074
renca_33	2	91265609	C	G	0/1	Arfgap2	ENSMUSG00000027255	ENSMUST00000028691	36-44	534	37	A/G	missense_variant	12291	21.574	WGSITYGVF	0.4663	2.364	17.5929
renca_34	16	64784689	C	T	0/1	Zfp654	ENSMUSG00000047141	ENSMUST00000052588	505-513	571	509	R/H	missense_variant	4709	5.45096	SMPKHRKFL	0.4965	2.397	2.2525
renca_35	5	137641931	C	T	0/1	Sap25	ENSMUSG00000079165	ENSMUST00000166099	63-71	261	68	T/I	missense_variant	674	3.11333	LSPRVISQV	0.5219	15.2893	4.9406
renca_36	3	127870912	T	G	0/1	Fam241a	ENSMUSG00000050549	ENSMUST00000199273	74-82	131	80	N/T	missense_variant	436	1.3951	FGELNKTLL	0.5537	2.8787	3.1558
renca_37	4	137621071	A	T	0/1	Usp48	ENSMUSG00000043411	ENSMUST00000055131	480-488	1052	486	E/V	missense_variant	9866	7.38218	AGAEPYVFV	0.561	4.1153	7.4021
renca_38	2	104730443	A	C	0/1	Depdc7	ENSMUSG00000027173	ENSMUST00000028595	67-75	511	69	S/A	missense_variant	4991	17.2578	VGAEAVDVI	0.5782	5.5809	3.5791
renca_39	1	54427466	C	T	0/1	Gtf3c3	ENSMUSG00000041303	ENSMUST00000041638	268-276	882	272	R/H	missense_variant	5754	8.46744	DGYRHILNL	0.5937	0.7283	8.4228
renca_40	2	71506854	G	C	0/1	Metap1d	ENSMUSG00000041921	ENSMUST00000037210	34-42	335	37	R/T	missense_variant	5082	8.1181	SQQTRHFFF	0.6089	0.2927	3.2348
renca_41	17	74623761	G	T	0/1	Birc6	ENSMUSG00000024073	ENSMUST00000180037	2435-2443	4873	2435	L/F	missense_variant	55598	15.6351	FAPVAAEAM	0.612	2.088	5.5103
renca_42	8	122574988	C	A	0/1	Aprt	ENSMUSG00000006589	ENSMUST00000211823	41-49	49	43	G/W	missense_variant	26362	118.303	SSWLKWWSV	0.6244	0.4247	5.0452
renca_43	11	70436749	T	G	0/1	Arrb2	ENSMUSG00000060216	ENSMUST00000079056	112-120	421	117	F/V	missense_variant	4568	11.6368	HAHPFVFTI	0.625	0.3395	1.3835
renca_44	11	73185286	C	T	0/1	Ctns	ENSMUSG00000005949	ENSMUST00000006103	308-316	367	308	G/R	missense_variant	2642	5.64668	RGSFSLLQM	0.6252	3.4525	9.9898
renca_45	11	101463049	G	A	0/1	Vat1	ENSMUSG00000034993	ENSMUST00000040430	161-169	406	165	A/V	missense_variant	32334	84.7219	TVPSVQTFL	0.6637	2.9806	2.9678
renca_46	19	43986203	T	A	0/1	Cpn1	ENSMUSG00000025196	ENSMUST00000026210	21-29	457	29	D/V	missense_variant	2873	5.6459	VTFRHHRYV	0.6654	2.1893	3.325
renca_47	12	75952897	A	C	0/1	Syne2	ENSMUSG00000063450	ENSMUST00000044217	2355-2363	6874	2355	S/R	missense_variant	135306	36.692	RSTEKHVKF	0.6687	5.3467	20.4584
renca_48	1	78360209	A	G	0/1	Sgpp2	ENSMUSG00000032908	ENSMUST00000036172	74-82	354	75	R/G	missense_variant	374	0.677303	RGLVVIWVL	0.6908	1.9225	11.0189
renca_49	15	102084736	G	A	0/1	Eif4b	ENSMUSG00000058655	ENSMUST00000169681	139-147	611	140	G/S	missense_variant	61327	99.4779	FSYAEFEDL	0.742	2.3815	4.6969
renca_50	9	44090139	C	T	0/1	Usp2	ENSMUSG00000032010	ENSMUST00000034508	321-329	619	326	T/M	missense_variant	3785	5.69361	TSSAHMALM	0.7604	3.1562	8.558
renca_51	15	88863234	G	C	0/1	Pim3	ENSMUSG00000035828	ENSMUST00000042818	101-109	326	101	G/A	missense_variant	4376	13.0676	AGARGVIRL	0.7665	6.7959	6.8779
renca_52	8	91441827	G	T	0/1	Fto	ENSMUSG00000055932	ENSMUST00000125471	298-306	316	303	V/L	missense_variant	4955	2.75584	VGSLRLGHL	0.7705	4.4533	11.2807
renca_53	9	59628629	A	C	0/1	Parp6	ENSMUSG00000025237	ENSMUST00000026267	168-176	630	169	K/T	missense_variant	1722	1.60765	KTFRAGLSI	0.772	2.7422	1.038
renca_54	1	66714640	A	G	0/1	Rpe	ENSMUSG00000026005	ENSMUST00000027157	85-93	228	89	N/S	missense_variant	9384	21.8473	VAGASQYTF	0.7722	0.7084	11.4881
renca_55	10	85907470	G	A	0/1	Prdm4	ENSMUSG00000035529	ENSMUST00000037646	300-308	796	307	S/F	missense_variant	6230	9.18843	STSHNLAFL	0.8	4.646	2.1396
renca_56	18	6439901	G	A	0/1	Epc1	ENSMUSG00000024240	ENSMUST00000028100	679-687	813	687	T/M	missense_variant	4867	7.88237	TTPTALVHM	0.8068	8.1065	10.8727
renca_57	6	136606736	T	G	0/1	Atf7ip	ENSMUSG00000030213	ENSMUST00000032335	1252-1260	1306	1255	V/G	missense_variant	12609	4.40914	IGEGKALPL	0.8225	2.6728	15.1749
renca_58	4	55385586	A	T	0/1	Rad23b	ENSMUSG00000028426	ENSMUST00000030134	369-377	416	374	K/N	missense_variant	28062	35.4752	VTPQENEAI	0.8258	26.0647	19.1234
renca_59	5	121308791	A	C	0/1	Hectd4	ENSMUSG00000042744	ENSMUST00000042614	1614-1622	4418	1619	K/T	missense_variant	4082	1.7992	RGNTRTQAL	0.8427	2.2795	5.7796
renca_60	18	36646753	A	C	0/1	Ankhd1	ENSMUSG00000024483	ENSMUST00000006205	1712-1720	2485	1716	N/T	missense_variant&NMD_transcript_variant	19495	14.3515	RGGCTITAI	0.8517	5.8885	2.0305
renca_61	14	57843208	C	G	0/1	Zdhhc20	ENSMUSG00000021969	ENSMUST00000089473	274-282	368	281	W/C	missense_variant	3610	3.62727	FGDEKKYCL	0.8566	4.2028	19.717
renca_62	6	71868625	C	G	0/1	Immt	ENSMUSG00000052337	ENSMUST00000064062	406-414	757	407	A/G	missense_variant	35845	22.8826	HGHRRIDQL	0.892	2.6282	5.6764
renca_63	3	89889282	G	C	0/1	Il6ra	ENSMUSG00000027947	ENSMUST00000029559	115-123	460	117	C/W	missense_variant	19845	16.6428	LSWFRKNPL	0.9046	0.7633	4.7503
renca_64	11	75156288	A	C	0/1	Smg6	ENSMUSG00000038290	ENSMUST00000045281	1268-1276	1418	1269	K/T	missense_variant	4899	4.20034	RTYILVVPL	0.9242	1.5054	5.5649
renca_65	2	27386535	C	A	0/1	Vav2	ENSMUSG00000009621	ENSMUST00000056176	89-97	868	92	E/D	missense_variant	9010	9.44324	RNSDLFDPF	0.9278	3.6647	12.7499
renca_66	9	7117450	T	G	0/1	Dync2h1	ENSMUSG00000047193	ENSMUST00000048417	2280-2288	4306	2280	S/R	missense_variant	5832	2.58548	RSDTKQPFI	0.9363	10.1135	13.3179
renca_67	2	30820605	G	A	0/1	Ntmt1	ENSMUSG00000026857	ENSMUST00000041830	107-115	223	107	E/K	missense_variant	6613	17.1293	KGKRVRNYF	0.9658	1.9156	6.4366
renca_68	3	90465120	C	G	0/1	Npr1	ENSMUSG00000027931	ENSMUST00000029540	125-133	1057	128	W/C	missense_variant	6441	9.75981	TAHCRVPLL	0.9676	0.688	6.3419
renca_69	17	35824284	C	T	0/1	Flot1	ENSMUSG00000059714	ENSMUST00000001569	40-48	428	42	S/F	missense_variant	2584	6.4734	RIFLNTLTL	0.9753	0.9073	1.8234
renca_70	4	148593859	C	G	0/1	Srm	ENSMUSG00000006442	ENSMUST00000006611	206-214	302	209	C/W	missense_variant	13089	59.3262	QGEWQWLHL	0.9991	1.4567	19.6805
renca_71	5	77321059	T	G	0/1	Polr2b	ENSMUSG00000029250	ENSMUST00000031167	227-235	1174	227	N/K	missense_variant	17215	26.7336	KSSRPTSTI	1.0227	14.4225	1.3844
renca_72	2	52105503	A	C	0/1	Rif1	ENSMUSG00000036202	ENSMUST00000112693	905-913	2426	911	E/D	missense_variant	26027	17.958	LGAYDSDLL	1.036	8.1429	17.1976
renca_73	8	124031074	G	C	0/1	Urb2	ENSMUSG00000031976	ENSMUST00000034457	1173-1181	1524	1173	Q/H	missense_variant	13788	16.2406	HSFQAALQF	1.0662	1.1222	7.5116
renca_74	8	91441827	G	T	0/1	Fto	ENSMUSG00000055932	ENSMUST00000125471	303-311	316	303	V/L	missense_variant	4955	2.75584	LGHLWGFEI	1.128	0.9199	8.8072
renca_75	8	35590582	T	C	0/1	Mfhas1	ENSMUSG00000070056	ENSMUST00000037666	736-744	1048	737	F/S	missense_variant	6895	7.49648	FSQRDASLL	1.1419	5.1016	2.7094
renca_76	4	138237203	T	C	0/1	Hp1bp3	ENSMUSG00000028759	ENSMUST00000030541	339-347	554	346	I/T	missense_variant	17111	14.7056	GSLMEYATL	1.1502	5.5875	4.1696
renca_77	13	97131999	C	G	0/1	Nsa2	ENSMUSG00000060739	ENSMUST00000073456	184-192	260	187	E/Q	missense_variant	14506	24.5923	THPQLKATF	1.1708	2.5974	1.6651
renca_78	11	107072857	T	G	0/1	Bptf	ENSMUSG00000040481	ENSMUST00000057892	1715-1723	2921	1722	K/T	missense_variant	18582	9.56417	TALPSYRTF	1.1742	0.3716	4.0718
renca_79	2	71506854	G	C	0/1	Metap1d	ENSMUSG00000041921	ENSMUST00000037210	35-43	335	37	R/T	missense_variant	5082	8.1181	QQTRHFFFW	1.1756	3.7381	11.1542
renca_80	MT	6234	G	A	0/1	mt-Co1	ENSMUSG00000064351	ENSMUST00000082402	302-310	514	303	A/T	missense_variant	913014	4282.89	RTYFTSATM	1.1841	1.4636	2.3109
renca_81	3	36566241	C	G	0/1	Ccna2	ENSMUSG00000027715	ENSMUST00000029270	414-422	422	421	S/T	missense_variant	33781	59.9627	LNPPETLTV	1.1894	21.05	24.3382
renca_82	10	22371418	C	T	0/1	Raet1d	ENSMUSG00000078452	ENSMUST00000095795	130-138	249	131	T/I	missense_variant	1432	7.20224	QIPSATWEF	1.2048	3.5375	18.8601
renca_83	4	154148775	C	G	0/1	Wrap73	ENSMUSG00000029029	ENSMUST00000030895	133-141	462	135	C/W	missense_variant	3458	5.78128	KAWQQGLTF	1.2209	0.4941	4.8676
renca_84	7	29263690	C	A	0/1	Spint2	ENSMUSG00000074227	ENSMUST00000098604	58-66	252	61	G/V	missense_variant	10022	15.9426	ITDVSCQPF	1.2238	4.9856	13.6472
renca_85	14	75707163	T	G	0/1	Cog3	ENSMUSG00000034893	ENSMUST00000049168	792-800	828	795	K/T	missense_variant	5309	7.42083	VFQTFHALL	1.2391	1.234	1.445
renca_86	7	30241290	A	C	0/1	Wdr62	ENSMUSG00000037020	ENSMUST00000108190	1365-1373	1524	1372	L/R	missense_variant	2815	3.55245	TPPAHLQRL	1.2434	0.5083	16.5008
renca_87	2	91165452	T	G	0/1	Madd	ENSMUSG00000040687	ENSMUST00000066420	854-862	1115	855	N/T	missense_variant	3755	2.9952	RTHSTSFSL	1.2451	0.6579	1.8075
renca_88	1	151796809	A	C	0/1	Edem3	ENSMUSG00000043019	ENSMUST00000059498	418-426	931	425	E/D	missense_variant	11356	12.8981	TGDPYYLDV	1.2544	5.6731	36.6778
renca_89	10	22371418	C	T	0/1	Raet1d	ENSMUSG00000078452	ENSMUST00000095795	128-136	249	131	T/I	missense_variant	1432	7.20224	QGQIPSATW	1.2754	6.3165	31.5972
renca_90	13	74360827	A	C	0/1	Lrrc14b	ENSMUSG00000021579	ENSMUST00000022064	484-492	510	487	L/R	missense_variant	1147	3.01738	SNERGTFLL	1.2795	3.2027	8.9085
renca_91	4	33330916	T	G	0/1	Rngtt	ENSMUSG00000028274	ENSMUST00000029942	166-174	581	173	L/R	missense_variant	2309	2.35896	KGDYLKERF	1.3016	11.8823	36.1005
renca_92	8	84004608	G	C	0/1	1700067K01Rik	ENSMUSG00000046408	ENSMUST00000060357	291-299	301	297	A/P	missense_variant	249	0.92214	AGPAAWPAP	1.351	25.98	33.8489
renca_93	2	31054064	T	G	0/1	Fnbp1	ENSMUSG00000075415	ENSMUST00000073879	315-323	554	315	K/T	missense_variant	5927	4.28275	TSRGKLWPF	1.3647	1.3124	13.5905
renca_94	3	108433109	T	G	0/1	Sars	ENSMUSG00000068739	ENSMUST00000090553	166-174	512	167	K/T	missense_variant	67936	95.7538	KTYSHVDLV	1.3736	6.7146	2.4635
renca_95	16	64784689	C	T	0/1	Zfp654	ENSMUSG00000047141	ENSMUST00000052588	504-512	571	509	R/H	missense_variant	4709	5.45096	LSMPKHRKF	1.3873	1.8703	11.8018
renca_96	19	21856184	A	C	0/1	Cemip2	ENSMUSG00000024754	ENSMUST00000025663	1326-1334	1383	1329	N/H	missense_variant	2454	2.66767	FSGHFAPSW	1.4088	13.9328	23.0035
renca_97	4	55008367	A	C	0/1	Zfp462	ENSMUSG00000060206	ENSMUST00000098070	104-112	2495	111	K/T	missense_variant	4184	2.83345	TNKFFQCTF	1.4134	2.2466	28.7417
renca_98	5	28071789	G	C	0/1	Insig1	ENSMUSG00000045294	ENSMUST00000059155	116-124	259	118	A/P	missense_variant	10978	25.7236	GTPAAVVGL	1.4278	20.465	14.5395
renca_99	6	4631540	G	C	0/1	Casd1	ENSMUSG00000015189	ENSMUST00000015333	545-553	797	552	G/A	missense_variant	6246	11.2132	GNFFWYLAL	1.4302	1.571	14.698
renca_100	1	10189617	T	G	0/1	Arfgef1	ENSMUSG00000067851	ENSMUST00000088615	537-545	1846	542	K/T	missense_variant	19863	12.7193	SSFDHTWMV	1.4507	1.3474	3.4358
renca_101	1	58471071	A	T	0/1	Orc2	ENSMUSG00000026037	ENSMUST00000027198	382-390	576	387	L/H	missense_variant	15715	29.5293	DSSLEHFLL	1.4625	3.1839	33.02
renca_102	17	48467428	T	C	0/1	Unc5cl	ENSMUSG00000043592	ENSMUST00000074574	483-491	518	483	C/R	missense_variant	314	0.705867	RASAIQNYL	1.4773	0.5813	1.231
renca_103	9	44819631	C	T	0/1	Kmt2a	ENSMUSG00000002028	ENSMUST00000002095	3120-3128	3963	3127	G/R	missense_variant	6391	2.77857	SGLTLTTRL	1.5102	0.9472	1.0015
renca_104	10	85907470	G	A	0/1	Prdm4	ENSMUSG00000035529	ENSMUST00000037646	299-307	796	307	S/F	missense_variant	6230	9.18843	LSTSHNLAF	1.52	2.7533	16.6102
renca_105	2	25573650	T	G	0/1	Phpt1	ENSMUSG00000036504	ENSMUST00000039156	111-119	124	111	K/T	missense_variant	1656	11.1749	TYPDYEVTW	1.5548	14.4545	9.4643
renca_106	16	16484203	A	C	0/1	Fgd4	ENSMUSG00000022788	ENSMUST00000069284	157-165	754	163	L/V	missense_variant	15550	6.43367	RTPGTDVGL	1.5762	20.4835	24.1748
renca_107	5	137600388	G	T	0/1	Mospd3	ENSMUSG00000037221	ENSMUST00000037620	23-31	235	30	P/T	missense_variant	927	3.65331	GSPPSSGTV	1.5909	29.2412	6.7847
renca_108	3	108428262	C	T	0/1	Sars	ENSMUSG00000068739	ENSMUST00000090553	384-392	512	390	R/H	missense_variant	67936	95.7538	PGSGAFHEL	1.5918	6.0939	19.1296
renca_109	10	81144332	G	C	0/1	Zbtb7a	ENSMUSG00000035011	ENSMUST00000048128	119-127	569	120	S/T	missense_variant	7266	7.73507	VTHVCADLL	1.595	3.671	6.8737
renca_110	11	70436749	T	G	0/1	Arrb2	ENSMUSG00000060216	ENSMUST00000079056	109-117	421	117	F/V	missense_variant	4568	11.6368	LGQHAHPFV	1.6253	3.2037	10.9262
renca_111	12	100654423	T	G	0/1	Rps6ka5	ENSMUSG00000021180	ENSMUST00000043599	73-81	863	80	K/T	missense_variant	1270	0.771398	AGKLYAMTV	1.6407	4.008	9.7083
renca_112	2	155992718	A	T	0/1	Cep250	ENSMUSG00000038241	ENSMUST00000039994	2186-2194	2434	2187	T/S	missense_variant	13369	9.34077	ISMFLQASV	1.6425	2.1556	1.3341
renca_113	16	14131464	G	A	0/1	Marf1	ENSMUSG00000060657	ENSMUST00000090300	1077-1085	1736	1077	P/L	missense_variant	17136	12.2322	LPPPNTDPW	1.6706	1.6334	27.7214
renca_114	15	27553761	G	A	0/1	Ank	ENSMUSG00000022265	ENSMUST00000022875	124-132	492	129	R/Q	missense_variant	17009	34.1476	VGSKTQRAF	1.7125	4.3848	19.2453
renca_115	1	10189617	T	G	0/1	Arfgef1	ENSMUSG00000067851	ENSMUST00000088615	535-543	1846	542	K/T	missense_variant	19863	12.7193	STSSFDHTW	1.7279	9.7727	15.6714
renca_116	17	24426712	G	C	0/1	Eci1	ENSMUSG00000024132	ENSMUST00000024946	2019-02-10	286	4	A/P	missense_variant	2506	8.5389	ALPAARRLL	1.7413	6.5611	3.8287
renca_117	1	88266118	C	G	0/1	Hjurp	ENSMUSG00000044783	ENSMUST00000054674	354-362	667	356	S/T	missense_variant	43287	37.6573	KSTPAWKEL	1.7562	2.5805	5.8624
renca_118	2	180207037	C	G	0/1	Lama5	ENSMUSG00000015647	ENSMUST00000015791	251-259	3718	257	D/H	missense_variant	37766	24.0349	YSPLLRHFT	1.772	12.1726	11.3178
renca_119	13	74360827	A	C	0/1	Lrrc14b	ENSMUSG00000021579	ENSMUST00000022064	483-491	510	487	L/R	missense_variant	1147	3.01738	TSNERGTFL	1.824	1.7989	3.8567
renca_120	2	146342594	T	G	0/1	Ralgapa2	ENSMUSG00000037110	ENSMUST00000109986	1449-1457	1910	1451	T/P	missense_variant	4749	1.82969	EGPELSSEV	1.8434	12.9638	12.3174
renca_121	12	78797321	G	A	0/1	Mpp5	ENSMUSG00000021112	ENSMUST00000082024	96-104	675	100	D/N	missense_variant	12373	10.2169	KTGINNPIF	1.885	8.2958	22.3272
renca_122	17	71517626	G	A	0/1	Ndc80	ENSMUSG00000024056	ENSMUST00000024851	196-204	642	196	T/I	missense_variant	9613	10.7301	IAMKESSPL	1.892	0.5503	0.9239
renca_123	8	46593685	A	C	0/1	Primpol	ENSMUSG00000038225	ENSMUST00000040468	191-199	537	192	I/S	missense_variant	6153	6.95584	KSLQPALHL	1.8923	3.301	3.1646
renca_124	2	160702733	A	C	0/1	Top1	ENSMUSG00000070544	ENSMUST00000109468	254-262	767	256	E/D	missense_variant	12828	8.91722	KADEVATFF	1.8981	1.6381	7.2863
renca_125	11	73185286	C	T	0/1	Ctns	ENSMUSG00000005949	ENSMUST00000006103	306-314	367	308	G/R	missense_variant	2642	5.64668	FTRGSFSLL	1.9288	1.7422	3.2418
renca_126	15	41789083	G	C	0/1	Oxr1	ENSMUSG00000022307	ENSMUST00000170127	17-25	832	17	G/A	missense_variant	43782	44.4661	ATASRLWGL	1.9452	3.3749	8.0295
renca_127	2	71506854	G	C	0/1	Metap1d	ENSMUSG00000041921	ENSMUST00000037210	33-41	335	37	R/T	missense_variant	5082	8.1181	GSQQTRHFF	1.9542	2.4327	5.872
renca_128	11	101463049	G	A	0/1	Vat1	ENSMUSG00000034993	ENSMUST00000040430	160-168	406	165	A/V	missense_variant	32334	84.7219	VTVPSVQTF	1.9591	5.3018	9.4572
renca_129	16	15769921	T	G	0/1	Prkdc	ENSMUSG00000022672	ENSMUST00000023352	2551-2559	4128	2557	F/V	missense_variant	18249	10.0295	LSLATNVLL	1.9718	2.4744	4.8412
renca_130	3	90465120	C	G	0/1	Npr1	ENSMUSG00000027931	ENSMUST00000029540	124-132	1057	128	W/C	missense_variant	6441	9.75981	FTAHCRVPL	1.9944	1.9549	2.3872
renca_131	11	101463049	G	A	0/1	Vat1	ENSMUSG00000034993	ENSMUST00000040430	162-170	406	165	A/V	missense_variant	32334	84.7219	VPSVQTFLM	9.1312	0.0202	26.378
renca_132	5	136120029	G	A	0/1	Polr2j	ENSMUSG00000039771	ENSMUST00000041366	27-35	117	30	A/T	missense_variant	6729	44.0944	VPNTCLFTI	5.2418	0.0253	4.4422
renca_133	17	24426712	G	C	0/1	Eci1	ENSMUSG00000024132	ENSMUST00000024946	2019-03-11	286	4	A/P	missense_variant	2506	8.5389	LPAARRLLL	3.9566	0.0294	12.1598
renca_134	1	134987648	C	G	0/1	Lgr6	ENSMUSG00000042793	ENSMUST00000044828	726-734	967	731	G/A	missense_variant	1093	1.15626	RPAALAFAV	9.5988	0.0323	5.2597
renca_135	7	79695023	A	C	0/1	Ticrr	ENSMUSG00000046591	ENSMUST00000035977	1540-1548	1889	1545	E/D	missense_variant	2245	1.62593	SPQTYDVEL	17.9138	0.0347	21.9233
renca_136	12	16940511	G	C	0/1	Rock2	ENSMUSG00000020580	ENSMUST00000020904	144-152	1388	145	A/P	missense_variant	39023	20.3511	MPFANSPWV	10.5986	0.0459	4.6541
renca_137	2	112337873	T	G	0/1	Slc12a6	ENSMUSG00000027130	ENSMUST00000028549	247-255	1150	254	F/V	missense_variant	6743	4.80766	VPAGGSYVM	20.4228	0.0485	19.5882
renca_138	11	103171406	G	C	0/1	Fmnl1	ENSMUSG00000055805	ENSMUST00000042286	27-35	1094	32	A/P	missense_variant	3826	5.67518	QPMPAPGEL	31.5575	0.064	12.3468
renca_139	8	81001124	T	C	0/1	Usp38	ENSMUSG00000038250	ENSMUST00000042724	323-331	1042	327	R/G	missense_variant	7525	9.50792	FPLVGPGAL	21.1519	0.084	6.8952
renca_140	1	135390578	G	A	0/1	Ipo9	ENSMUSG00000041879	ENSMUST00000041023	694-702	1040	698	A/V	missense_variant	24146	21.2557	FPAVVQCTL	5.7785	0.0899	5.0775
renca_141	9	99580342	C	T	0/1	Dbr1	ENSMUSG00000032469	ENSMUST00000156035	138-146	148	146	S/L	missense_variant	4222	12.2986	SPRTCMSSL	15.2497	0.0917	6.0927
renca_142	1	65268845	A	T	0/1	Pikfyve	ENSMUSG00000025949	ENSMUST00000081154	1807-1815	2052	1815	K/M	missense_variant	15431	5.82147	SPWQARGGM	30.9787	0.094	17.1474
renca_143	14	31010964	A	G	0/1	Glt8d1	ENSMUSG00000021916	ENSMUST00000022476	242-250	371	249	N/S	missense_variant	3524	7.66742	NPGVFVASL	15.0821	0.0959	25.7731
renca_144	8	3604925	A	C	0/1	Camsap3	ENSMUSG00000044433	ENSMUST00000057028	838-846	1252	838	K/T	missense_variant	850	1.00676	TPALIEIPL	17.3447	0.1104	20.3261
renca_145	11	60753960	T	G	0/1	Top3a	ENSMUSG00000002814	ENSMUST00000002891	306-314	1003	306	D/A	missense_variant&splice_region_variant	2542	4.0059	APMATVVEV	28.2438	0.12	4.3619
renca_146	11	101275047	G	C	0/1	Wnk4	ENSMUSG00000035112	ENSMUST00000103108	795-803	1222	800	G/A	missense_variant	4298	7.50958	SPSSPATPL	17.1127	0.1253	6.8622
renca_147	17	46722299	G	A	0/1	Pex6	ENSMUSG00000002763	ENSMUST00000002840	580-588	981	583	D/N	missense_variant	2194	4.18889	LPTNVQTAF	23.6144	0.1334	26.131
renca_148	5	28071789	G	C	0/1	Insig1	ENSMUSG00000045294	ENSMUST00000059155	117-125	259	118	A/P	missense_variant	10978	25.7236	TPAAVVGLL	12.5415	0.1445	10.4933
renca_149	4	154148775	C	G	0/1	Wrap73	ENSMUSG00000029029	ENSMUST00000030895	131-139	462	135	C/W	missense_variant	3458	5.78128	YPKAWQQGL	23.3235	0.17	24.9321
renca_150	10	58414016	G	A	0/1	Lims1	ENSMUSG00000019920	ENSMUST00000020077	286-294	396	292	R/H	missense_variant	20614	30.5459	KPFLGHHHY	28.8567	0.1713	40.3889
renca_151	8	70914453	C	G	0/1	Map1s	ENSMUSG00000019261	ENSMUST00000019405	660-668	973	667	C/W	missense_variant	5260	4.78737	SPHDVDLWL	28.2736	0.1779	26.759
renca_152	6	124522276	T	A	0/1	C1ra	ENSMUSG00000055172	ENSMUST00000068593	474-482	707	474	F/I	missense_variant	10367	25.2046	IPWQAFTTT	27.4362	0.1986	20.814
renca_153	11	69403622	T	G	0/1	Kdm6b	ENSMUSG00000018476	ENSMUST00000094077	1208-1216	1641	1208	N/T	missense_variant	1436	1.49661	TPITVIRGL	31.431	0.2017	12.9017
renca_154	11	48866018	G	A	0/1	Irgm1	ENSMUSG00000046879	ENSMUST00000049519	336-344	409	338	S/F	missense_variant	3305	4.12272	MKFQNFYTL	2.5506	0.2044	1.4743
renca_155	3	129280570	A	C	0/1	Enpep	ENSMUSG00000028024	ENSMUST00000029658	769-777	945	776	L/R	missense_variant	18149	27.9505	IPVNLRLRV	25.444	0.2226	12.9815
renca_156	11	60189424	C	A	0/1	Rai1	ENSMUSG00000062115	ENSMUST00000064190	1435-1443	1889	1438	P/Q	missense_variant	2431	1.837	RPCQGQPLL	16.8611	0.2286	19.2995
renca_157	1	88266118	C	G	0/1	Hjurp	ENSMUSG00000044783	ENSMUST00000054674	356-364	667	356	S/T	missense_variant	43287	37.6573	TPAWKELQM	21.6116	0.239	36.445
renca_158	7	80238400	G	C	0/1	Gdpgp1	ENSMUSG00000050973	ENSMUST00000062915	54-62	386	60	D/H	missense_variant	946	1.6367	VPLSRFHSA	19.4669	0.2518	18.9045
renca_159	4	119282189	C	T	0/1	Ybx1	ENSMUSG00000028639	ENSMUST00000079644	198-206	322	203	R/Q	missense_variant	46411	132.898	RPYARQPQY	27.7315	0.2636	54.0142
renca_160	1	134350219	T	G	0/1	Tmem183a	ENSMUSG00000042305	ENSMUST00000049470	263-271	375	269	K/T	missense_variant	14026	28.5223	SPRLKSTCM	26.9701	0.2958	34.7312
renca_161	15	81006457	C	T	0/1	Sgsm3	ENSMUSG00000042303	ENSMUST00000137255	71-79	83	71	P/S	missense_variant	4164	6.74081	SPQRLRWQA	33.6723	0.3399	23.1179
renca_162	17	45590026	G	C	0/1	Slc29a1	ENSMUSG00000023942	ENSMUST00000051574	68-76	460	71	P/A	missense_variant	3045	5.50615	VALAARSSL	5.1434	0.3402	0.8594
renca_163	8	124031074	G	C	0/1	Urb2	ENSMUSG00000031976	ENSMUST00000034457	1171-1179	1524	1173	Q/H	missense_variant	13788	16.2406	NAHSFQAAL	4.5369	0.3615	3.522
renca_164	7	24924984	A	C	0/1	Arhgef1	ENSMUSG00000040940	ENSMUST00000047873	745-753	920	752	N/T	missense_variant	3565	3.34161	SERKNWCTL	9.0704	0.3813	4.2054
renca_165	1	54427466	C	T	0/1	Gtf3c3	ENSMUSG00000041303	ENSMUST00000041638	265-273	882	272	R/H	missense_variant	5754	8.46744	MAMDGYRHI	5.2355	0.3861	0.8627
renca_166	10	128487994	G	C	0/1	Smarcc2	ENSMUSG00000025369	ENSMUST00000026433	1065-1073	1099	1067	G/A	missense_variant	11822	15.4323	VPASGHPGV	29.7201	0.3915	20.3317
renca_167	2	94375120	A	C	0/1	Ttc17	ENSMUSG00000027194	ENSMUST00000094801	293-301	956	294	F/V	missense_variant	5065	4.086	DVFTSYYTL	4.9444	0.3931	6.1089
renca_168	9	53480734	C	T	0/1	Atm	ENSMUSG00000034218	ENSMUST00000118282	1783-1791	3063	1785	R/Q	missense_variant	16708	11.7132	VPQSVKEDV	50.3837	0.4012	34.8942
renca_169	10	121840112	T	G	0/1	Srgap1	ENSMUSG00000020121	ENSMUST00000020322	439-447	1062	442	K/N	missense_variant&splice_region_variant	396	0.314281	YFMNLREFL	3.3871	0.4337	0.0297
renca_170	1	134987648	C	G	0/1	Lgr6	ENSMUSG00000042793	ENSMUST00000044828	728-736	967	731	G/A	missense_variant	1093	1.15626	AALAFAVAL	2.9618	0.4412	4.2414
renca_171	2	170120364	T	A	0/1	Zfp217	ENSMUSG00000052056	ENSMUST00000063710	2019-12-20	1041	14	E/D	missense_variant	4052	4.78366	GPDVLSSSL	23.8099	0.4664	16.7426
renca_172	3	86417940	G	A	0/1	Lrba	ENSMUSG00000028080	ENSMUST00000107635	1897-1905	2854	1902	E/K	missense_variant	12733	4.77553	VANEAKFIL	3.7987	0.4721	6.3504
renca_173	10	42696277	A	C	0/1	Ostm1	ENSMUSG00000038280	ENSMUST00000040718	216-224	338	219	K/Q	missense_variant	14736	14.8106	LPPQNYSEV	2.8826	0.4999	6.2089
renca_174	5	137606845	C	G	0/1	Pcolce	ENSMUSG00000029718	ENSMUST00000031731	324-332	468	329	A/P	missense_variant	18307	34.7057	SPATQPTPV	29.073	0.5217	5.7955
renca_175	4	119282189	C	T	0/1	Ybx1	ENSMUSG00000028639	ENSMUST00000079644	203-211	322	203	R/Q	missense_variant	46411	132.898	QPQYSNPPV	43.0917	0.5504	25.1841
renca_176	17	24426712	G	C	0/1	Eci1	ENSMUSG00000024132	ENSMUST00000024946	2019-01-09	286	4	A/P	missense_variant	2506	8.5389	MALPAARRL	6.1076	0.5567	2.8623
renca_177	10	14684945	C	G	0/1	Vta1	ENSMUSG00000019868	ENSMUST00000149485	91-99	251	91	E/Q	missense_variant	6833	21.8834	QNYALKMFL	2.728	0.5891	3.8037
renca_178	15	97384358	T	G	0/1	Pced1b	ENSMUSG00000044250	ENSMUST00000059433	86-94	433	93	F/V	missense_variant	1655	5.45954	HHLVRFYVL	2.0821	0.5914	1.0662
renca_179	2	91265609	C	G	0/1	Arfgap2	ENSMUSG00000027255	ENSMUST00000028691	33-41	534	37	A/G	missense_variant	12291	21.574	SPSWGSITY	32.2647	0.5985	54.2746
renca_180	14	75707163	T	G	0/1	Cog3	ENSMUSG00000034893	ENSMUST00000049168	791-799	828	795	K/T	missense_variant	5309	7.42083	QVFQTFHAL	6.6611	0.6065	3.5715
renca_181	8	11612796	C	A	0/1	Ankrd10	ENSMUSG00000031508	ENSMUST00000033905	306-314	415	312	Q/H	missense_variant	6324	6.11762	NGVSNGHPL	2.0653	0.6142	1.2413
renca_182	11	71001656	T	G	0/1	Dhx33	ENSMUSG00000040620	ENSMUST00000108527	95-103	698	96	T/P	missense_variant	5887	4.25342	TPQIPQYLY	44.4273	0.6208	87.2466
renca_183	3	90459972	C	G	0/1	Npr1	ENSMUSG00000027931	ENSMUST00000029540	512-520	1057	518	R/S	missense_variant	6441	9.75981	QPSSLESHL	41.3442	0.6282	21.8877
renca_184	11	100584586	T	G	0/1	Dnajc7	ENSMUSG00000014195	ENSMUST00000014339	399-407	494	399	K/N	missense_variant	9633	14.3564	NAYRKRALM	3.4208	0.6548	6.3612
renca_185	7	12977879	G	C	0/1	Zfp446	ENSMUSG00000033961	ENSMUST00000045810	2019-06-14	523	10	A/P	missense_variant	1018	1.02829	NPQSPPSYV	42.4227	0.6732	19.2568
renca_186	4	137956484	A	C	0/1	Ece1	ENSMUSG00000057530	ENSMUST00000102518	544-552	753	549	N/T	missense_variant	7448	10.1848	TPPMVTAYY	10.179	0.6819	56.0436
renca_187	10	14684945	C	G	0/1	Vta1	ENSMUSG00000019868	ENSMUST00000149485	87-95	251	91	E/Q	missense_variant	6833	21.8834	CAHLQNYAL	3.8903	0.707	5.7703
renca_188	10	121840112	T	G	0/1	Srgap1	ENSMUSG00000020121	ENSMUST00000020322	435-443	1062	442	K/N	missense_variant&splice_region_variant	396	0.314281	TEQFYFMNL	6.9144	0.7115	25.6962
renca_189	2	33453963	T	C	0/1	Zbtb43	ENSMUSG00000026788	ENSMUST00000028125	373-381	467	380	S/G	missense_variant	6503	9.02019	YPCQCGKGF	35.5779	0.7124	43.3522
renca_190	5	121334367	A	C	0/1	Hectd4	ENSMUSG00000042744	ENSMUST00000042614	2716-2724	4418	2722	E/A	missense_variant	4082	1.7992	IARQTVAFL	3.4194	0.7448	4.1315
renca_191	2	131172729	T	G	0/1	Spef1	ENSMUSG00000027329	ENSMUST00000028801	84-92	234	91	K/T	missense_variant	1439	3.79656	VPDDVMRTI	19.222	0.7758	19.4698
renca_192	15	86496903	T	G	0/1	Tbc1d22a	ENSMUSG00000051864	ENSMUST00000063414	499-507	516	505	F/V	missense_variant	5657	11.9845	EAYRLKVAF	7.7116	0.8801	17.9154
renca_193	5	137600388	G	T	0/1	Mospd3	ENSMUSG00000037221	ENSMUST00000037620	24-32	235	30	P/T	missense_variant	927	3.65331	SPPSSGTVV	9.4537	0.886	6.604
renca_194	5	31261055	C	T	0/1	Ift172	ENSMUSG00000038564	ENSMUST00000041565	1195-1203	1749	1195	D/N	missense_variant	3865	4.23328	NPDSVAEVL	21.7655	0.9076	30.628
renca_195	2	180207037	C	G	0/1	Lama5	ENSMUSG00000015647	ENSMUST00000015791	252-260	3718	257	D/H	missense_variant	37766	24.0349	SPLLRHFTK	19.925	0.9599	49.9937
renca_196	12	110628766	T	G	0/1	Dync1h1	ENSMUSG00000018707	ENSMUST00000018851	1371-1379	4644	1371	F/V	missense_variant	87043	40.2889	VPARLRQYA	36.4246	0.9627	16.2701
renca_197	4	137621071	A	T	0/1	Usp48	ENSMUSG00000043411	ENSMUST00000055131	478-486	1052	486	E/V	missense_variant	9866	7.38218	LPAGAEPYV	35.485	0.972	25.728
renca_198	10	80381578	G	C	0/1	Mex3d	ENSMUSG00000048696	ENSMUST00000105350	597-605	718	602	P/A	missense_variant	5803	12.8773	VPWRPAQSA	47.3069	0.9824	38.5595
renca_199	13	97131999	C	G	0/1	Nsa2	ENSMUSG00000060739	ENSMUST00000073456	180-188	260	187	E/Q	missense_variant	14506	24.5923	KAHVTHPQL	2.9892	0.9829	3.2553
renca_200	10	4369640	C	G	0/1	Zbtb2	ENSMUSG00000075327	ENSMUST00000100077	126-134	514	129	A/P	missense_variant	3263	3.20702	FPLPSSLYG	35.4167	0.9883	19.6063
renca_201	1	58471071	A	T	0/1	Orc2	ENSMUSG00000026037	ENSMUST00000027198	386-394	576	387	L/H	missense_variant	15715	29.5293	EHFLLIHNL	9.335	0.989	2.3376
renca_202	1	33454246	C	T	0/1	Prim2	ENSMUSG00000026134	ENSMUST00000027312	447-455	505	453	R/H	missense_variant	10302	12.5739	FFFESQHIL	3.3265	1.005	0.2866
renca_203	11	103171406	G	C	0/1	Fmnl1	ENSMUSG00000055805	ENSMUST00000042286	31-39	1094	32	A/P	missense_variant	3826	5.67518	APGELEERF	30.5383	1.0614	62.8017
renca_204	11	86555214	T	G	0/1	Tubd1	ENSMUSG00000020513	ENSMUST00000020821	227-235	486	227	L/V	missense_variant	1296	4.53757	VNQVLAHQL	3.2978	1.0639	6.7345
renca_205	1	134987648	C	G	0/1	Lgr6	ENSMUSG00000042793	ENSMUST00000044828	730-738	967	731	G/A	missense_variant	1093	1.15626	LAFAVALVM	8.8379	1.0974	15.1983
renca_206	11	3680194	G	T	0/1	Morc2a	ENSMUSG00000034543	ENSMUST00000093389	456-464	1030	463	K/N	missense_variant	6746	8.13099	IAQRGIINF	2.1987	1.107	16.3111
renca_207	9	44090139	C	T	0/1	Usp2	ENSMUSG00000032010	ENSMUST00000034508	324-332	619	326	T/M	missense_variant	3785	5.69361	AHMALMEEF	4.6692	1.1159	0.4261
renca_208	17	35824284	C	T	0/1	Flot1	ENSMUSG00000059714	ENSMUST00000001569	35-43	428	42	S/F	missense_variant	2584	6.4734	IQQIQRIFL	6.4446	1.1169	4.9313
renca_209	4	46005622	C	T	0/1	Tdrd7	ENSMUSG00000035517	ENSMUST00000102929	443-451	1086	443	P/L	missense_variant	4834	8.85155	LPLVIPTEA	69.0653	1.1725	30.2838
renca_210	10	85907470	G	A	0/1	Prdm4	ENSMUSG00000035529	ENSMUST00000037646	305-313	796	307	S/F	missense_variant	6230	9.18843	LAFLESVSL	3.2072	1.1841	9.8646
renca_211	19	21856184	A	C	0/1	Cemip2	ENSMUSG00000024754	ENSMUST00000025663	1329-1337	1383	1329	N/H	missense_variant	2454	2.66767	HFAPSWTKL	9.5032	1.1997	0.2458
renca_212	15	97384358	T	G	0/1	Pced1b	ENSMUSG00000044250	ENSMUST00000059433	85-93	433	93	F/V	missense_variant	1655	5.45954	DHHLVRFYV	16.4711	1.218	2.7164
renca_213	10	121840112	T	G	0/1	Srgap1	ENSMUSG00000020121	ENSMUST00000020322	438-446	1062	442	K/N	missense_variant&splice_region_variant	396	0.314281	FYFMNLREF	3.2374	1.2259	0.1782
renca_214	2	155992718	A	T	0/1	Cep250	ENSMUSG00000038241	ENSMUST00000039994	2187-2195	2434	2187	T/S	missense_variant	13369	9.34077	SMFLQASVL	2.3079	1.2263	0.5942
renca_215	2	155992718	A	T	0/1	Cep250	ENSMUSG00000038241	ENSMUST00000039994	2182-2190	2434	2187	T/S	missense_variant	13369	9.34077	SLQEISMFL	3.8792	1.2431	3.1827
renca_216	5	124376186	T	G	0/1	Sbno1	ENSMUSG00000038095	ENSMUST00000065263	1308-1316	1391	1315	K/N	missense_variant	18656	6.78319	SVLSVWTNV	16.6325	1.256	1.6108
renca_217	1	97840283	G	T	0/1	Pam	ENSMUSG00000026335	ENSMUST00000058762	735-743	979	741	P/T	missense_variant	15505	9.44942	FAISYITGF	2.9026	1.258	6.026
renca_218	1	134987648	C	G	0/1	Lgr6	ENSMUSG00000042793	ENSMUST00000044828	724-732	967	731	G/A	missense_variant	1093	1.15626	EGRPAALAF	4.0937	1.2716	27.2607
renca_219	8	122896007	C	T	0/1	Ankrd11	ENSMUSG00000035569	ENSMUST00000098333	362-370	2664	369	E/K	missense_variant	44778	19.5735	TPVKDEYKF	38.1498	1.2916	68.0814
renca_220	10	81144332	G	C	0/1	Zbtb7a	ENSMUSG00000035011	ENSMUST00000048128	116-124	569	120	S/T	missense_variant	7266	7.73507	IPAVTHVCA	43.1695	1.2983	34.0845
renca_221	1	170005158	C	G	0/1	Ddr2	ENSMUSG00000026674	ENSMUST00000027985	106-114	854	111	G/A	missense_variant	50642	39.6187	HAGGHAIEF	5.7803	1.323	22.3325
renca_222	11	70436749	T	G	0/1	Arrb2	ENSMUSG00000060216	ENSMUST00000079056	116-124	421	117	F/V	missense_variant	4568	11.6368	FVFTIPQNL	9.9968	1.3263	2.7431
renca_223	1	156064881	A	C	0/1	Tor1aip2	ENSMUSG00000050565	ENSMUST00000060404	304-312	502	311	K/T	missense_variant	35895	28.2219	FLWQRGRTF	4.9115	1.3284	8.528
renca_224	17	15555196	A	C	0/1	Prdm9	ENSMUSG00000051977	ENSMUST00000147532	132-140	283	137	L/R	missense_variant	1499	2.52182	IPEAGRGVW	20.4339	1.3486	40.0824
renca_225	5	149188403	G	C	0/1	Uspl1	ENSMUSG00000041264	ENSMUST00000050472	51-59	1089	54	G/A	missense_variant	7286	5.15777	RAKAKLSAL	3.38	1.3596	3.5153
renca_226	2	146342594	T	G	0/1	Ralgapa2	ENSMUSG00000037110	ENSMUST00000109986	1445-1453	1910	1451	T/P	missense_variant	4749	1.82969	NAHVEGPEL	18.6665	1.3649	14.295
renca_227	10	12711496	G	C	0/1	Utrn	ENSMUSG00000019820	ENSMUST00000076817	929-937	3430	932	A/G	missense_variant	22105	9.36439	AAQGSLNAL	9.0146	1.3762	2.2826
renca_228	4	138237203	T	C	0/1	Hp1bp3	ENSMUSG00000028759	ENSMUST00000030541	342-350	554	346	I/T	missense_variant	17111	14.7056	MEYATLSAI	18.4741	1.3896	1.3252
renca_229	8	35590582	T	C	0/1	Mfhas1	ENSMUSG00000070056	ENSMUST00000037666	737-745	1048	737	F/S	missense_variant	6895	7.49648	SQRDASLLL	8.7514	1.3993	3.6724
renca_230	11	60753960	T	G	0/1	Top3a	ENSMUSG00000002814	ENSMUST00000002891	300-308	1003	306	D/A	missense_variant&splice_region_variant	2542	4.0059	YQLCMEAPM	9.4482	1.4026	0.5459
renca_231	6	124522276	T	A	0/1	C1ra	ENSMUSG00000055172	ENSMUST00000068593	470-478	707	474	F/I	missense_variant	10367	25.2046	RPGNIPWQA	56.6058	1.4146	59.4117
renca_232	1	66714640	A	G	0/1	Rpe	ENSMUSG00000026005	ENSMUST00000027157	87-95	228	89	N/S	missense_variant	9384	21.8473	GASQYTFHL	3.0798	1.4307	6.2931
renca_233	10	4369640	C	G	0/1	Zbtb2	ENSMUSG00000075327	ENSMUST00000100077	124-132	514	129	A/P	missense_variant	3263	3.20702	QVFPLPSSL	18.517	1.433	3.9867
renca_234	3	67596691	G	A	0/1	Mfsd1	ENSMUSG00000027775	ENSMUST00000029344	333-341	464	339	A/T	missense_variant	21618	51.5044	VLYAVATTL	5.633	1.4345	1.6505
renca_235	16	36970545	A	T	0/1	Fbxo40	ENSMUSG00000047746	ENSMUST00000075869	68-76	710	68	S/T	missense_variant	5400	7.0938	TEYGCPLSM	30.2617	1.463	15.8415
renca_236	8	70912627	T	G	0/1	Map1s	ENSMUSG00000019261	ENSMUST00000019405	139-147	973	143	F/V	missense_variant	5260	4.78737	SAHHVLQVL	7.2368	1.4805	2.7152
renca_237	16	90252363	C	T	0/1	Scaf4	ENSMUSG00000022983	ENSMUST00000039280	272-280	1209	279	A/T	missense_variant	4235	5.53429	AAAISTATL	2.4562	1.4818	1.4935
renca_238	5	28071789	G	C	0/1	Insig1	ENSMUSG00000045294	ENSMUST00000059155	111-119	259	118	A/P	missense_variant	10978	25.7236	VPPCCGTPA	18.782	1.5059	16.8679
renca_239	9	78098410	G	C	0/1	Fbxo9	ENSMUSG00000001366	ENSMUST00000001402	109-117	437	115	P/A	missense_variant	2769	6.4674	RAMQLVADI	3.0089	1.5292	0.6892
renca_240	14	75707163	T	G	0/1	Cog3	ENSMUSG00000034893	ENSMUST00000049168	788-796	828	795	K/T	missense_variant	5309	7.42083	NIQQVFQTF	9.2485	1.532	14.9358
renca_241	13	104806714	G	C	0/1	Cwc27	ENSMUSG00000021715	ENSMUST00000022228	105-113	469	107	H/D	missense_variant	2352	5.93321	GPDDNGSQF	38.0272	1.5348	44.0799
renca_242	8	71465271	G	C	0/1	Mrpl34	ENSMUSG00000034880	ENSMUST00000048914	22-30	92	29	W/C	missense_variant	2235	26.6856	RYLQSRVCM	14.1361	1.5367	0.1026
renca_243	2	167989487	C	G	0/1	Ripor3	ENSMUSG00000074577	ENSMUST00000099073	464-472	938	465	E/Q	missense_variant	1116	1.9058	VQRPGWRDL	18.1912	1.5734	8.9031
renca_244	3	129280570	A	C	0/1	Enpep	ENSMUSG00000028024	ENSMUST00000029658	774-782	945	776	L/R	missense_variant	18149	27.9505	RLRVYRYGM	12.9295	1.5761	25.8967
renca_245	2	146342594	T	G	0/1	Ralgapa2	ENSMUSG00000037110	ENSMUST00000109986	1450-1458	1910	1451	T/P	missense_variant	4749	1.82969	GPELSSEVF	30.4585	1.5825	55.4915
renca_246	2	30113388	G	C	0/1	Zer1	ENSMUSG00000039686	ENSMUST00000044751	2019-01-09	779	6	P/A	missense_variant	1734	1.28446	MASDTAESL	8.7885	1.6148	7.7751
renca_247	2	180207037	C	G	0/1	Lama5	ENSMUSG00000015647	ENSMUST00000015791	256-264	3718	257	D/H	missense_variant	37766	24.0349	RHFTKATNI	3.6014	1.6299	0.1004
renca_248	3	107985075	C	G	0/1	Gstm2	ENSMUSG00000040562	ENSMUST00000012348	111-119	218	112	A/P	missense_variant	13362	57.6778	LPMVCYSPD	39.5198	1.6383	32.5286
renca_249	12	105813266	T	G	0/1	Papola	ENSMUSG00000021111	ENSMUST00000021535	367-375	739	367	F/V	missense_variant&NMD_transcript_variant	35263	38.7519	VFQKYKHYI	5.8953	1.6527	0.7048
renca_250	10	80287650	G	C	0/1	Dazap1	ENSMUSG00000069565	ENSMUST00000092305	382-390	406	387	G/A	missense_variant	14117	34.753	GPPAGASGF	14.6654	1.653	36.5859
renca_251	7	25388474	G	T	0/1	Lipe	ENSMUSG00000003123	ENSMUST00000003207	96-104	802	97	L/M	missense_variant	986	1.21407	QMLGVAHHF	13.2253	1.6655	3.3956
renca_252	6	4631540	G	C	0/1	Casd1	ENSMUSG00000015189	ENSMUST00000015333	544-552	797	552	G/A	missense_variant	6246	11.2132	NGNFFWYLA	2.7022	1.7082	25.5451
renca_253	18	60821651	A	C	0/1	Tcof1	ENSMUSG00000024613	ENSMUST00000163446	972-980	1013	976	S/A	missense_variant&NMD_transcript_variant	10593	14.579	KAAAAAQVL	2.5985	1.7155	1.471
renca_254	13	48489797	G	A	0/1	Zfp169	ENSMUSG00000050954	ENSMUST00000110110	616-624	731	618	T/M	missense_variant	202	0.182611	IHMGEKPFL	7.6709	1.7176	0.9829
renca_255	6	4631540	G	C	0/1	Casd1	ENSMUSG00000015189	ENSMUST00000015333	551-559	797	552	G/A	missense_variant	6246	11.2132	LALLLKLGL	11.3955	1.727	14.5744
renca_256	13	97131999	C	G	0/1	Nsa2	ENSMUSG00000060739	ENSMUST00000073456	185-193	260	187	E/Q	missense_variant	14506	24.5923	HPQLKATFC	32.8077	1.7381	53.8026
renca_257	3	122512670	C	G	0/1	Bcar3	ENSMUSG00000028121	ENSMUST00000029766	444-452	820	446	H/Q	missense_variant	1969	2.54645	QAQDSHEML	11.8961	1.7382	11.8175
renca_258	16	5203608	C	G	0/1	Nagpa	ENSMUSG00000023143	ENSMUST00000023911	87-95	517	93	G/A	missense_variant	7523	23.0055	EGRAVAAHL	10.4544	1.7484	13.4945
renca_259	16	26371423	G	C	0/1	Cldn1	ENSMUSG00000022512	ENSMUST00000023154	65-73	211	68	D/E	missense_variant	17516	26.2233	KVFESLLNL	3.4716	1.7494	3.2289
renca_260	7	127801870	G	C	0/1	Hsd3b7	ENSMUSG00000042289	ENSMUST00000046863	116-124	369	120	G/A	missense_variant	3775	9.88058	CVQTATQYL	5.4245	1.7499	1.7276
renca_261	9	44090139	C	T	0/1	Usp2	ENSMUSG00000032010	ENSMUST00000034508	320-328	619	326	T/M	missense_variant	3785	5.69361	HTSSAHMAL	3.2463	1.7575	3.7617
renca_262	18	35654235	G	A	0/1	Prob1	ENSMUSG00000073600	ENSMUST00000097619	311-319	1006	318	A/V	missense_variant	563	1.34532	WPSLRERVI	20.9889	1.772	25.1335
renca_263	2	112337873	T	G	0/1	Slc12a6	ENSMUSG00000027130	ENSMUST00000028549	252-260	1150	254	F/V	missense_variant	6743	4.80766	SYVMISRAL	12.0265	1.7929	0.0107
renca_264	13	73683925	C	G	0/1	Slc6a19	ENSMUSG00000021565	ENSMUST00000022048	503-511	634	511	V/L	missense_variant	2046	2.96212	FAVVYVYGL	4.3693	1.8053	15.7376
renca_265	2	122068772	G	T	0/1	Spg11	ENSMUSG00000033396	ENSMUST00000036450	1603-1611	2430	1611	L/M	missense_variant	8328	7.50525	YELGKLLQM	29.5385	1.8128	13.6204
renca_266	11	75156288	A	C	0/1	Smg6	ENSMUSG00000038290	ENSMUST00000045281	1263-1271	1418	1269	K/T	missense_variant	4899	4.20034	RLLESRTYI	8.8569	1.8177	0.2411
renca_267	1	10189617	T	G	0/1	Arfgef1	ENSMUSG00000067851	ENSMUST00000088615	541-549	1846	542	K/T	missense_variant	19863	12.7193	HTWMVIQTL	5.8761	1.8276	6.5607
renca_268	16	23027122	T	C	0/1	Kng2	ENSMUSG00000060459	ENSMUST00000039338	70-78	462	78	I/V	missense_variant	3314	8.78501	TFYSFNYQV	9.1986	1.8576	1.5064
renca_269	17	84423150	A	G	0/1	Thada	ENSMUSG00000024251	ENSMUST00000047524	1040-1048	1938	1040	V/A	missense_variant	5796	3.65719	ALACCWRSM	9.5298	1.8627	5.3604
renca_270	17	35824284	C	T	0/1	Flot1	ENSMUSG00000059714	ENSMUST00000001569	38-46	428	42	S/F	missense_variant	2584	6.4734	IQRIFLNTL	4.8596	1.8732	5.1144
renca_271	11	84364385	A	G	0/1	Acaca	ENSMUSG00000020532	ENSMUST00000020843	1916-1924	2345	1923	E/G	missense_variant	24847	10.547	DPIDRIIGF	30.1372	1.8754	73.4449
renca_272	8	13172564	C	G	0/1	Lamp1	ENSMUSG00000031447	ENSMUST00000033824	241-249	406	249	I/M	missense_variant	122969	333.166	KTVTRAFNM	2.9042	1.8824	7.5068
renca_273	13	67592277	A	C	0/1	Zfp729b	ENSMUSG00000058093	ENSMUST00000012873	619-627	1045	623	L/R	missense_variant	1869	2.78429	YPSRRFSHT	25.8092	1.9027	24.9414
renca_274	MT	6234	G	A	0/1	mt-Co1	ENSMUSG00000064351	ENSMUST00000082402	303-311	514	303	A/T	missense_variant	913014	4282.89	TYFTSATMI	7.7401	1.9134	0.0067
renca_275	10	43510632	A	T	0/1	Bend3	ENSMUSG00000038214	ENSMUST00000040147	334-342	825	340	R/S	missense_variant	3647	3.87617	SRFWAQSEM	15.4782	1.9137	1.9937
renca_276	9	78098410	G	C	0/1	Fbxo9	ENSMUSG00000001366	ENSMUST00000001402	111-119	437	115	P/A	missense_variant	2769	6.4674	MQLVADIEF	16.5478	1.9287	12.291
renca_277	5	30256288	A	C	0/1	Selenoi	ENSMUSG00000075703	ENSMUST00000132404	149-157	198	149	K/T	missense_variant&NMD_transcript_variant	9588	5.29037	TYNTGVLFL	7.704	1.9353	0.0938
renca_278	19	29811212	T	A	0/1	Ranbp6	ENSMUSG00000074909	ENSMUST00000099525	572-580	1105	580	K/I	missense_variant	1718	2.72158	VGLAVGKEI	5.6687	1.9667	3.1954
renca_279	9	44090139	C	T	0/1	Usp2	ENSMUSG00000032010	ENSMUST00000034508	318-326	619	326	T/M	missense_variant	3785	5.69361	LGHTSSAHM	4.5002	1.967	4.6685
renca_280	16	55998220	A	C	0/1	Zbtb11	ENSMUSG00000022601	ENSMUST00000050248	665-673	1050	669	K/T	missense_variant	15421	15.022	IHMLTHTGV	11.9868	1.9698	0.191
renca_281	1	34442944	G	C	0/1	Imp4	ENSMUSG00000026127	ENSMUST00000027303	49-57	291	49	E/D	missense_variant	8409	7.12548	DALALQGSL	24.117	1.9754	11.2691
renca_282	11	70436749	T	G	0/1	Arrb2	ENSMUSG00000060216	ENSMUST00000079056	110-118	421	117	F/V	missense_variant	4568	11.6368	GQHAHPFVF	6.2241	1.9793	5.3111
renca_283	1	162709592	T	G	0/1	Prrc2c	ENSMUSG00000040225	ENSMUST00000028016	627-635	2844	629	Q/H	missense_variant	35980	16.2046	GAHPRPGYF	6.4403	1.9871	11.69
renca_284	6	34908164	G	A	0/1	Wdr91	ENSMUSG00000058486	ENSMUST00000081214	149-157	748	154	T/I	missense_variant	2268	3.53339	RQWADIFII	4.5298	1.9932	2.5275
renca_285	10	12941546	C	T	0/1	Stx11	ENSMUSG00000039232	ENSMUST00000042861	143-151	287	145	E/K	missense_variant	543	0.934995	MYKYNQAEM	16.1778	1.9958	0.328
renca_286	2	23193139	C	G	0/1	Yme1l1	ENSMUSG00000026775	ENSMUST00000028117	539-547	715	539	A/G	missense_variant	29545	26.7358	GYHESGHAI	29.7718	6.331	0.0086
renca_287	19	43986203	T	A	0/1	Cpn1	ENSMUSG00000025196	ENSMUST00000026210	27-35	457	29	D/V	missense_variant	2873	5.6459	RYVDLVRTL	8.5631	3.7215	0.0184
renca_288	10	127170947	G	C	0/1	B4galnt1	ENSMUSG00000006731	ENSMUST00000006914	391-399	533	391	G/A	missense_variant	7770	16.3037	AYATTYRQL	10.7394	3.653	0.0216
renca_289	9	110378749	T	G	0/1	Scap	ENSMUSG00000032485	ENSMUST00000098350	507-515	1276	509	F/V	missense_variant	11056	10.7656	IYVLARTRL	11.7251	3.3605	0.0268
renca_290	1	151796809	A	C	0/1	Edem3	ENSMUSG00000043019	ENSMUST00000059498	422-430	931	425	E/D	missense_variant	11356	12.8981	YYLDVGKTL	16.3028	2.4594	0.0295
renca_291	2	131296297	C	A	0/1	Pank2	ENSMUSG00000037514	ENSMUST00000145904	168-176	183	176	L/I	missense_variant	16034	23.6577	GYFGAVGAI	27.5584	10.6791	0.0296
renca_292	3	67596691	G	A	0/1	Mfsd1	ENSMUSG00000027775	ENSMUST00000029344	334-342	464	339	A/T	missense_variant	21618	51.5044	LYAVATTLV	12.4033	7.6561	0.0372
renca_293	2	170120364	T	A	0/1	Zfp217	ENSMUSG00000052056	ENSMUST00000063710	2019-08-16	1041	14	E/D	missense_variant	4052	4.78366	VYMDGPDVL	9.7047	2.3102	0.0633
renca_294	12	76025648	T	G	0/1	Syne2	ENSMUSG00000063450	ENSMUST00000044217	4487-4495	6874	4492	L/R	missense_variant	135306	36.692	AYTTQREEL	21.9879	8.7009	0.0643
renca_295	12	110625492	A	C	0/1	Dync1h1	ENSMUSG00000018707	ENSMUST00000018851	1066-1074	4644	1072	E/D	missense_variant	87043	40.2889	IYNRLGDDL	18.2079	7.2839	0.1239
renca_296	11	75156288	A	C	0/1	Smg6	ENSMUSG00000038290	ENSMUST00000045281	1269-1277	1418	1269	K/T	missense_variant	4899	4.20034	TYILVVPLI	8.1477	5.2321	0.139
renca_297	7	79464802	G	C	0/1	Polg	ENSMUSG00000039176	ENSMUST00000073889	132-140	1217	137	A/G	missense_variant	10534	7.10717	PYLEAGASL	32.2183	10.1472	0.1544
renca_298	16	15769921	T	G	0/1	Prkdc	ENSMUSG00000022672	ENSMUST00000023352	2549-2557	4128	2557	F/V	missense_variant	18249	10.0295	HFLSLATNV	43.4844	6.0524	0.1558
renca_299	5	142904212	T	G	0/1	Actb	ENSMUSG00000029580	ENSMUST00000100497	274-282	375	280	N/T	missense_variant	477032	1290.52	IHETTFTSI	4.8739	2.8566	0.2296
renca_300	9	53480734	C	T	0/1	Atm	ENSMUSG00000034218	ENSMUST00000118282	1779-1787	3063	1785	R/Q	missense_variant	16708	11.7132	KFLEVPQSV	36.0277	7.0583	0.2631
renca_301	1	97840283	G	T	0/1	Pam	ENSMUSG00000026335	ENSMUST00000058762	738-746	979	741	P/T	missense_variant	15505	9.44942	SYITGFLFA	24.5856	8.6521	0.2864
renca_302	10	22371418	C	T	0/1	Raet1d	ENSMUSG00000078452	ENSMUST00000095795	123-131	249	131	T/I	missense_variant	1432	7.20224	IYPQSQGQI	3.9362	12.2438	0.2965
renca_303	2	180207037	C	G	0/1	Lama5	ENSMUSG00000015647	ENSMUST00000015791	250-258	3718	257	D/H	missense_variant	37766	24.0349	SYSPLLRHF	10.4997	3.9118	0.3049
renca_304	6	4631540	G	C	0/1	Casd1	ENSMUSG00000015189	ENSMUST00000015333	549-557	797	552	G/A	missense_variant	6246	11.2132	WYLALLLKL	15.3222	5.2306	0.3369
renca_305	1	54427466	C	T	0/1	Gtf3c3	ENSMUSG00000041303	ENSMUST00000041638	269-277	882	272	R/H	missense_variant	5754	8.46744	GYRHILNLL	23.2087	8.6477	0.337
renca_306	6	134718581	G	C	0/1	Dusp16	ENSMUSG00000030203	ENSMUST00000100857	423-431	660	429	A/G	missense_variant	13977	12.9903	DYYKPSGTL	15.7577	3.1146	0.3616
renca_307	19	29811212	T	A	0/1	Ranbp6	ENSMUSG00000074909	ENSMUST00000099525	580-588	1105	580	K/I	missense_variant	1718	2.72158	IFMQDASNV	38.1044	8.3374	0.3768
renca_308	12	72574133	G	C	0/1	Pcnx4	ENSMUSG00000034501	ENSMUST00000044352	901-909	1177	909	S/T	missense_variant	2963	4.99403	AYIPLVEFT	54.6625	30.9137	0.3851
renca_309	MT	13329	C	A	0/1	mt-Nd5	ENSMUSG00000064367	ENSMUST00000082418	528-536	607	530	P/T	missense_variant	23926	95.0678	FFTSIIHRI	13.1458	7.9314	0.4354
renca_310	18	35213371	C	G	0/1	Lrrtm2	ENSMUSG00000071862	ENSMUST00000091636	292-300	515	293	D/H	missense_variant	392	0.501504	LHSKILNSL	8.0209	2.885	0.443
renca_311	16	64784689	C	T	0/1	Zfp654	ENSMUSG00000047141	ENSMUST00000052588	508-516	571	509	R/H	missense_variant	4709	5.45096	KHRKFLTDI	12.7066	6.2817	0.5552
renca_312	14	64210475	C	T	0/1	Msra	ENSMUSG00000054733	ENSMUST00000067927	159-167	233	164	A/T	missense_variant	1080	1.82242	VYPTSTVQM	2.8516	4.9455	0.5694
renca_313	7	29263690	C	A	0/1	Spint2	ENSMUSG00000074227	ENSMUST00000098604	53-61	252	61	G/V	missense_variant	10022	15.9426	RWWYNITDV	21.7896	6.3003	0.5924
renca_314	5	143255023	T	G	0/1	Zfp316	ENSMUSG00000046658	ENSMUST00000051665	410-418	1017	414	T/P	missense_variant	1529	1.47242	SHLVPHRRI	12.7076	3.5824	0.5952
renca_315	3	108433109	T	G	0/1	Sars	ENSMUSG00000068739	ENSMUST00000090553	167-175	512	167	K/T	missense_variant	67936	95.7538	TYSHVDLVV	26.9583	15.215	0.6062
renca_316	6	38195052	A	C	0/1	D630045J12Rik	ENSMUSG00000063455	ENSMUST00000117556	582-590	1799	586	L/R	missense_variant	2823	1.52117	SHVHRTSAF	5.5801	2.5924	0.6067
renca_317	8	45984052	T	G	0/1	Ufsp2	ENSMUSG00000031634	ENSMUST00000209443	78-86	211	85	L/R	missense_variant&NMD_transcript_variant	16619	27.3307	RFIQVRKRL	23.3313	4.2821	0.6171
renca_318	15	100520598	A	T	0/1	Tfcp2	ENSMUSG00000009733	ENSMUST00000009877	227-235	500	228	L/M	missense_variant	3972	3.57027	HMHSASCQI	9.3196	4.0552	0.6172
renca_319	10	79903403	T	G	0/1	Med16	ENSMUSG00000013833	ENSMUST00000105378	178-186	864	182	K/T	missense_variant	1383	2.14954	SFGETFSRV	20.1622	11.6504	0.6282
renca_320	1	156064881	A	C	0/1	Tor1aip2	ENSMUSG00000050565	ENSMUST00000060404	305-313	502	311	K/T	missense_variant	35895	28.2219	LWQRGRTFL	10.846	2.9872	0.6824
renca_321	19	43986203	T	A	0/1	Cpn1	ENSMUSG00000025196	ENSMUST00000026210	24-32	457	29	D/V	missense_variant	2873	5.6459	RHHRYVDLV	3.8088	6.1458	0.7062
renca_322	18	80197319	T	G	0/1	Rbfa	ENSMUSG00000024570	ENSMUST00000025462	140-148	350	143	K/T	missense_variant	2255	11.8686	VYWTTGVSA	57.9735	8.7827	0.7184
renca_323	1	33454246	C	T	0/1	Prim2	ENSMUSG00000026134	ENSMUST00000027312	446-454	505	453	R/H	missense_variant	10302	12.5739	QFFFESQHI	23.4864	5.9253	0.7258
renca_324	3	122007566	A	C	0/1	Arhgap29	ENSMUSG00000039831	ENSMUST00000037958	647-655	1266	650	K/T	missense_variant	14945	12.2875	CHRTCLENL	10.2323	4.097	0.7925
renca_325	2	91165452	T	G	0/1	Madd	ENSMUSG00000040687	ENSMUST00000066420	852-860	1115	855	N/T	missense_variant	3755	2.9952	LYRTHSTSF	10.9161	2.704	0.8416
renca_326	19	6910210	T	G	0/1	Trmt112	ENSMUSG00000038812	ENSMUST00000088257	2019-05-13	125	9	L/R	missense_variant	5808	34.1391	THNLRSSHV	18.4973	7.4395	0.8553
renca_327	11	69889251	A	T	0/1	Acap1	ENSMUSG00000001588	ENSMUST00000001631	272-280	740	280	F/L	missense_variant	13209	19.6253	LFKRASNAL	16.3376	3.6427	0.8982
renca_328	11	62265532	A	C	0/1	Adora2b	ENSMUSG00000018500	ENSMUST00000018644	269-277	332	269	K/T	missense_variant	208	0.817062	TWVMNVAIL	9.3939	6.9333	0.9274
renca_329	4	128747133	T	A	0/1	Phc2	ENSMUSG00000028796	ENSMUST00000030588	671-679	850	671	L/H	missense_variant	3271	3.35597	HFHSDRSKL	40.7702	6.4342	0.9464
renca_330	2	91720560	T	G	0/1	Harbi1	ENSMUSG00000027243	ENSMUST00000090608	289-297	349	293	L/V	missense_variant	1095	1.42019	SHIIVACCV	14.8298	5.1892	0.9536
renca_331	3	36567876	C	T	0/1	Ccna2	ENSMUSG00000027715	ENSMUST00000029270	269-277	422	274	D/N	missense_variant	33781	59.9627	VYITDNTYS	71.6964	39.1146	0.9616
renca_332	7	80238400	G	C	0/1	Gdpgp1	ENSMUSG00000050973	ENSMUST00000062915	59-67	386	60	D/H	missense_variant	946	1.6367	FHSALRSAW	5.9757	3.104	0.9757
renca_333	6	131376089	T	A	0/1	Ybx3	ENSMUSG00000030189	ENSMUST00000032309	207-215	361	214	Q/L	missense_variant	24647	58.0908	QFSGARNLL	17.8558	4.0028	1.0259
renca_334	17	45590026	G	C	0/1	Slc29a1	ENSMUSG00000023942	ENSMUST00000051574	71-79	460	71	P/A	missense_variant	3045	5.50615	AARSSLSAI	11.3666	2.6741	1.0518
renca_335	3	89889282	G	C	0/1	Il6ra	ENSMUSG00000027947	ENSMUST00000029559	116-124	460	117	C/W	missense_variant	19845	16.6428	SWFRKNPLV	6.8553	5.9716	1.062
renca_336	1	170005158	C	G	0/1	Ddr2	ENSMUSG00000026674	ENSMUST00000027985	109-117	854	111	G/A	missense_variant	50642	39.6187	GHAIEFAPM	11.1585	5.4371	1.0743
renca_337	6	82760229	T	G	0/1	Hk2	ENSMUSG00000000628	ENSMUST00000000642	27-35	917	34	E/A	missense_variant	21906	26.598	YHMRLSDAT	27.7475	16.7892	1.0751
renca_338	6	34908164	G	A	0/1	Wdr91	ENSMUSG00000058486	ENSMUST00000081214	146-154	748	154	T/I	missense_variant	2268	3.53339	YFSRQWADI	10.1413	5.1046	1.0942
renca_339	10	128487994	G	C	0/1	Smarcc2	ENSMUSG00000025369	ENSMUST00000026433	1059-1067	1099	1067	G/A	missense_variant	11822	15.4323	SMMPGAVPA	23.4546	5.3765	1.172
renca_340	2	166585260	G	A	0/1	Prex1	ENSMUSG00000039621	ENSMUST00000036719	1007-1015	1650	1015	A/V	missense_variant	9736	6.87334	TQHCITTMV	23.4081	5.5429	1.1925
renca_341	8	122574988	C	A	0/1	Aprt	ENSMUSG00000006589	ENSMUST00000006764	143-151	180	147	R/L	missense_variant	26362	118.303	LHQLLAEVV	15.4259	6.0908	1.1926
renca_342	13	100160808	A	T	0/1	Naip2	ENSMUSG00000078945	ENSMUST00000067975	899-907	1447	907	L/I	missense_variant	3455	5.16717	FSLFISENI	2.1021	3.9902	1.2027
renca_343	18	36646753	A	C	0/1	Ankhd1	ENSMUSG00000024483	ENSMUST00000006205	1709-1717	2485	1716	N/T	missense_variant&NMD_transcript_variant	19495	14.3515	IMGRGGCTI	4.1048	8.0337	1.2376
renca_344	15	97384358	T	G	0/1	Pced1b	ENSMUSG00000044250	ENSMUST00000059433	91-99	433	93	F/V	missense_variant	1655	5.45954	FYVLTRVYS	68.1856	31.3535	1.2463
renca_345	9	54451708	T	G	0/1	Dmxl2	ENSMUSG00000041268	ENSMUST00000118163	406-414	3054	413	K/N	missense_variant	15022	8.1951	IFMHQLRNL	14.287	3.4983	1.2469
renca_346	15	78791154	G	A	0/1	Card10	ENSMUSG00000033170	ENSMUST00000164826	461-469	1070	467	R/W	missense_variant	2683	3.92671	QYRKQVWGL	26.0681	3.9692	1.2752
renca_347	12	69579944	C	G	0/1	Vcpkmt	ENSMUSG00000049882	ENSMUST00000058639	208-216	228	212	E/Q	missense_variant	3746	26.4354	EYRSQDIHI	45.8113	11.1851	1.2768
renca_348	10	126887584	CC	AA	0/1	Atp23	ENSMUSG00000025436	ENSMUST00000168520	208-216	246	216	R/L	missense_variant	1626	2.79849	VFQTCFNDL	12.3288	2.9869	1.2841
renca_349	13	73683925	C	G	0/1	Slc6a19	ENSMUSG00000021565	ENSMUST00000022048	506-514	634	511	V/L	missense_variant	2046	2.96212	VYVYGLDRF	10.4991	11.3479	1.3073
renca_350	16	10560047	A	C	0/1	Clec16a	ENSMUSG00000068663	ENSMUST00000038145	30-38	912	36	N/T	missense_variant	3530	3.05732	YHVLTKTTT	53.227	24.5912	1.3191
renca_351	10	127192816	C	G	0/1	Dtx3	ENSMUSG00000040415	ENSMUST00000038217	181-189	347	181	R/S	missense_variant	2734	7.70399	SHSFCEGCI	11.0884	12.2181	1.3284
renca_352	10	22371400	C	T	0/1	Raet1d	ENSMUSG00000078452	ENSMUST00000095795	123-131	249	125	P/L	missense_variant	1432	7.20224	IYLQSQGQT	81.8302	43.1639	1.3392
renca_353	8	22663700	C	G	0/1	Ikbkb	ENSMUSG00000031537	ENSMUST00000033939	701-709	757	702	D/H	missense_variant	11123	4.22549	SHKKSEELV	29.8367	15.4741	1.3456
renca_354	11	86555214	T	G	0/1	Tubd1	ENSMUSG00000020513	ENSMUST00000020821	223-231	486	227	L/V	missense_variant	1296	4.53757	SFRDVNQVL	21.8535	2.167	1.3749
renca_355	10	58454702	A	C	0/1	Ranbp2	ENSMUSG00000003226	ENSMUST00000003310	123-131	3053	128	S/R	missense_variant	55114	34.0586	KLFPGRPAI	9.4876	3.012	1.3781
renca_356	16	10560047	A	C	0/1	Clec16a	ENSMUSG00000068663	ENSMUST00000038145	29-37	912	36	N/T	missense_variant	3530	3.05732	LYHVLTKTT	77.7369	34.7713	1.39
renca_357	11	83953289	T	G	0/1	Ddx52	ENSMUSG00000020677	ENSMUST00000049257	400-408	598	401	L/R	missense_variant	12062	26.2363	KRLAMRELV	25.5979	6.3124	1.4023
renca_358	7	80238400	G	C	0/1	Gdpgp1	ENSMUSG00000050973	ENSMUST00000062915	58-66	386	60	D/H	missense_variant	946	1.6367	RFHSALRSA	46.3157	17.5076	1.41
renca_359	11	107072857	T	G	0/1	Bptf	ENSMUSG00000040481	ENSMUST00000057892	1719-1727	2921	1722	K/T	missense_variant	18582	9.56417	SYRTFVTKS	59.8307	23.9598	1.428
renca_360	7	41648302	C	G	0/1	Zfp788	ENSMUSG00000074165	ENSMUST00000045720	93-101	864	101	L/V	missense_variant	1323	2.20627	IFPGLKSEV	14.0952	16.5167	1.4377
renca_361	6	135377272	T	A	0/1	Emp1	ENSMUSG00000030208	ENSMUST00000032330	16-24	160	21	V/D	missense_variant	6266	7.6517	AIMLFDSTI	8.4464	4.3941	1.4514
renca_362	6	131376089	T	A	0/1	Ybx3	ENSMUSG00000030189	ENSMUST00000032309	206-214	361	214	Q/L	missense_variant	24647	58.0908	GQFSGARNL	17.1827	3.1324	1.4648
renca_363	18	35213371	C	G	0/1	Lrrtm2	ENSMUSG00000071862	ENSMUST00000091636	288-296	515	293	D/H	missense_variant	392	0.501504	KLNSLHSKI	15.7614	13.9508	1.4714
renca_364	14	64210475	C	T	0/1	Msra	ENSMUSG00000054733	ENSMUST00000067927	157-165	233	164	A/T	missense_variant	1080	1.82242	SAVYPTSTV	10.3787	6.9662	1.4743
renca_365	2	131296297	C	A	0/1	Pank2	ENSMUSG00000037514	ENSMUST00000145904	169-177	183	176	L/I	missense_variant	16034	23.6577	YFGAVGAIL	13.1234	2.9715	1.5036
renca_366	3	86417940	G	A	0/1	Lrba	ENSMUSG00000028080	ENSMUST00000107635	1902-1910	2854	1902	E/K	missense_variant	12733	4.77553	KFILSRQRA	64.7351	27.7464	1.54
renca_367	1	10189617	T	G	0/1	Arfgef1	ENSMUSG00000067851	ENSMUST00000088615	538-546	1846	542	K/T	missense_variant	19863	12.7193	SFDHTWMVI	4.894	3.9553	1.5525
renca_368	2	92614341	A	T	0/1	Chst1	ENSMUSG00000027221	ENSMUST00000065797	384-392	411	386	K/M	missense_variant	1298	3.51017	GYMMANSEE	76.7397	39.0141	1.5685
renca_369	8	46593685	A	C	0/1	Primpol	ENSMUSG00000038225	ENSMUST00000040468	192-200	537	192	I/S	missense_variant	6153	6.95584	SLQPALHLI	4.4325	3.9675	1.5723
renca_370	11	69588703	C	T	0/1	Trp53	ENSMUSG00000059552	ENSMUST00000005371	203-211	387	207	R/C	missense_variant	3705	6.63832	RQTFCHSVV	7.893	6.9966	1.5942
renca_371	10	9899196	T	G	0/1	Stxbp5	ENSMUSG00000019790	ENSMUST00000038213	65-73	1152	71	K/T	missense_variant	7909	3.47123	AFDPVQTIL	11.1576	7.07	1.6042
renca_372	18	32265703	G	C	0/1	Ercc3	ENSMUSG00000024382	ENSMUST00000025241	672-680	783	678	Q/H	missense_variant	8542	21.8371	AYSTKRHRF	13.511	7.2126	1.609
renca_373	2	119660276	T	C	0/1	Ndufaf1	ENSMUSG00000027305	ENSMUST00000028768	96-104	330	103	E/G	missense_variant	3292	15.8953	HFRRLKDGI	39.7835	14.6245	1.6357
renca_374	17	24574136	G	C	0/1	Pkd1	ENSMUSG00000032855	ENSMUST00000035565	1592-1600	4293	1599	G/A	missense_variant	3956	1.64635	SYTFRSVAT	45.5354	25.8198	1.6458
renca_375	4	55008367	A	C	0/1	Zfp462	ENSMUSG00000060206	ENSMUST00000098070	106-114	2495	111	K/T	missense_variant	4184	2.83345	KFFQCTFCV	13.0568	5.8126	1.6931
renca_376	2	122068772	G	T	0/1	Spg11	ENSMUSG00000033396	ENSMUST00000036450	1610-1618	2430	1611	L/M	missense_variant	8328	7.50525	QMFVGTEQL	8.8328	2.1458	1.6956
renca_377	18	60821651	A	C	0/1	Tcof1	ENSMUSG00000024613	ENSMUST00000175934	975-983	1356	976	S/A	missense_variant	10593	14.579	AAAQTSSAV	16.8451	6.9934	1.7251
renca_378	16	10560047	A	C	0/1	Clec16a	ENSMUSG00000068663	ENSMUST00000038145	31-39	912	36	N/T	missense_variant	3530	3.05732	HVLTKTTTV	22.3231	7.1094	1.7346
renca_379	10	7798419	T	G	0/1	Ppil4	ENSMUSG00000015757	ENSMUST00000015901	108-116	492	109	L/R	missense_variant	8774	9.85885	FRITTGENL	22.8546	6.7693	1.7435
renca_380	8	4304976	C	G	0/1	Elavl1	ENSMUSG00000040028	ENSMUST00000098950	76-84	326	76	R/T	missense_variant	13677	9.56519	TAISTLNGL	8.4582	2.2076	1.7946
renca_381	4	138237203	T	C	0/1	Hp1bp3	ENSMUSG00000028759	ENSMUST00000030541	343-351	554	346	I/T	missense_variant	17111	14.7056	EYATLSAIA	64.5506	35.7067	1.8053
renca_382	X	102145474	T	G	0/1	Ercc6l	ENSMUSG00000051220	ENSMUST00000056904	475-483	1240	476	Q/H	missense_variant	4765	6.51346	LHDEGHQTL	5.7492	4.2234	1.8342
renca_383	2	91265609	C	G	0/1	Arfgap2	ENSMUSG00000027255	ENSMUST00000028691	35-43	534	37	A/G	missense_variant	12291	21.574	SWGSITYGV	26.6588	9.0961	1.9027
renca_384	3	97583905	A	C	0/1	Chd1l	ENSMUSG00000028089	ENSMUST00000029730	422-430	900	424	L/V	missense_variant	3465	5.82794	MNVTAADTV	7.848	7.4902	1.9386

## Sheet: H-2-Dd_NetMHCpan
			H-2-Dd
Pos	Peptide	ID	core	icore	1-log50k	nM	Rank	Ave	NB
0	TSTSSFDHT	PEPLIST	TSTSSFDHT	TSTSSFDHT	0.0497	29215.6	18.0923	0.0497	0
0	STSSFDHTW	PEPLIST	STSSFDHTW	STSSFDHTW	0.1504	9824.93	1.7279	0.1504	1
0	TSSFDHTWM	PEPLIST	TSSFDHTWM	TSSFDHTWM	0.1003	16895.3	4.7103	0.1003	0
0	SSFDHTWMV	PEPLIST	SSFDHTWMV	SSFDHTWMV	0.1599	8862.24	1.4507	0.1599	1
0	SFDHTWMVI	PEPLIST	SFDHTWMVI	SFDHTWMVI	0.0987	17183.7	4.894	0.0987	0
0	FDHTWMVIQ	PEPLIST	FDHTWMVIQ	FDHTWMVIQ	0.0099	44925.9	82.7489	0.0099	0
0	DHTWMVIQT	PEPLIST	DHTWMVIQT	DHTWMVIQT	0.0213	39695.5	48.8288	0.0213	0
0	HTWMVIQTL	PEPLIST	HTWMVIQTL	HTWMVIQTL	0.0913	18624.7	5.8761	0.0913	0
0	TWMVIQTLT	PEPLIST	TWMVIQTLT	TWMVIQTLT	0.019	40697.9	54.08	0.019	0
0	NQFFFESQH	PEPLIST	NQFFFESQH	NQFFFESQH	0.0131	43400.8	71.4732	0.0131	0
0	QFFFESQHI	PEPLIST	QFFFESQHI	QFFFESQHI	0.0414	31936.5	23.4864	0.0414	0
0	FFFESQHIL	PEPLIST	FFFESQHIL	FFFESQHIL	0.1161	14240.6	3.3265	0.1161	0
0	FFESQHILT	PEPLIST	FFESQHILT	FFESQHILT	0.0184	40965.6	55.5503	0.0184	0
0	FESQHILTG	PEPLIST	FESQHILTG	FESQHILTG	0.0163	41903	61.2173	0.0163	0
0	ESQHILTGG	PEPLIST	ESQHILTGG	ESQHILTGG	0.0173	41458.3	58.4735	0.0173	0
0	SQHILTGGK	PEPLIST	SQHILTGGK	SQHILTGGK	0.0202	40196	51.4286	0.0202	0
0	QHILTGGKD	PEPLIST	QHILTGGKD	QHILTGGKD	0.0073	46202.7	91.5707	0.0073	0
0	HILTGGKDI	PEPLIST	HILTGGKDI	HILTGGKDI	0.0138	43078.5	69.1591	0.0138	0
0	VPPGPVDQT	PEPLIST	VPPGPVDQT	VPPGPVDQT	0.026	37748.5	40.4865	0.026	0
0	PPGPVDQTF	PEPLIST	PPGPVDQTF	PPGPVDQTF	0.0184	40962.1	55.5291	0.0184	0
0	PGPVDQTFQ	PEPLIST	PGPVDQTFQ	PGPVDQTFQ	0.0236	38718.1	44.407	0.0236	0
0	GPVDQTFQS	PEPLIST	GPVDQTFQS	GPVDQTFQS	0.0071	46296.8	92.1289	0.0071	0
0	PVDQTFQSI	PEPLIST	PVDQTFQSI	PVDQTFQSI	0.0403	32321.3	24.3493	0.0403	0
0	VDQTFQSIV	PEPLIST	VDQTFQSIV	VDQTFQSIV	0.0482	29683.3	18.9666	0.0482	0
0	DQTFQSIVI	PEPLIST	DQTFQSIVI	DQTFQSIVI	0.037	33497.6	27.182	0.037	0
0	QTFQSIVIG	PEPLIST	QTFQSIVIG	QTFQSIVIG	0.0275	37120.8	38.112	0.0275	0
0	TFQSIVIGC	PEPLIST	TFQSIVIGC	TFQSIVIGC	0.0155	42287	63.7262	0.0155	0
0	VKQSKMDES	PEPLIST	VKQSKMDES	VKQSKMDES	0.0092	45249.9	85.1694	0.0092	0
0	KQSKMDESQ	PEPLIST	KQSKMDESQ	KQSKMDESQ	0.0101	44833.7	82.0534	0.0101	0
0	QSKMDESQK	PEPLIST	QSKMDESQK	QSKMDESQK	0.0115	44164.9	77.0721	0.0115	0
0	SKMDESQKY	PEPLIST	SKMDESQKY	SKMDESQKY	0.0104	44655	80.7028	0.0104	0
0	KMDESQKYS	PEPLIST	KMDESQKYS	KMDESQKYS	0.0185	40916	55.254	0.0185	0
0	MDESQKYSE	PEPLIST	MDESQKYSE	MDESQKYSE	0.007	46339.4	92.3812	0.007	0
0	DESQKYSEQ	PEPLIST	DESQKYSEQ	DESQKYSEQ	0.0055	47127.7	95.5509	0.0055	0
0	ESQKYSEQY	PEPLIST	ESQKYSEQY	ESQKYSEQY	0.0268	37418.3	39.2302	0.0268	0
0	SQKYSEQYS	PEPLIST	SQKYSEQYS	SQKYSEQYS	0.0113	44225.2	77.5177	0.0113	0
0	DLRYITISE	PEPLIST	DLRYITISE	DLRYITISE	0.0066	46532.8	93.5243	0.0066	0
0	LRYITISEN	PEPLIST	LRYITISEN	LRYITISEN	0.0082	45759.4	88.7483	0.0082	0
0	RYITISENR	PEPLIST	RYITISENR	RYITISENR	0.0187	40830.7	54.7758	0.0187	0
0	YITISENRV	PEPLIST	YITISENRV	YITISENRV	0.0237	38707.3	44.3591	0.0237	0
0	ITISENRVI	PEPLIST	ITISENRVI	ITISENRVI	0.0689	23734	10.3978	0.0689	0
0	TISENRVID	PEPLIST	TISENRVID	TISENRVID	0.0082	45776.8	88.8693	0.0082	0
0	ISENRVIDA	PEPLIST	ISENRVIDA	ISENRVIDA	0.0278	37000.1	37.6852	0.0278	0
0	SENRVIDAA	PEPLIST	SENRVIDAA	SENRVIDAA	0.0154	42318.1	63.9286	0.0154	0
0	ENRVIDAAK	PEPLIST	ENRVIDAAK	ENRVIDAAK	0.0127	43571.2	72.7163	0.0127	0
0	LIPTELRRD	PEPLIST	LIPTELRRD	LIPTELRRD	0.0168	41672	59.7302	0.0168	0
0	IPTELRRDA	PEPLIST	IPTELRRDA	IPTELRRDA	0.0105	44607.2	80.3404	0.0105	0
0	PTELRRDAL	PEPLIST	PTELRRDAL	PTELRRDAL	0.0397	32546.9	24.854	0.0397	0
0	TELRRDALA	PEPLIST	TELRRDALA	TELRRDALA	0.0146	42693.4	66.4748	0.0146	0
0	ELRRDALAL	PEPLIST	ELRRDALAL	ELRRDALAL	0.0313	35634.7	33.1369	0.0313	0
0	LRRDALALQ	PEPLIST	LRRDALALQ	LRRDALALQ	0.007	46350.9	92.4495	0.007	0
0	RRDALALQG	PEPLIST	RRDALALQG	RRDALALQG	0.0151	42461.6	64.8601	0.0151	0
0	RDALALQGS	PEPLIST	RDALALQGS	RDALALQGS	0.0155	42271.4	63.625	0.0155	0
0	DALALQGSL	PEPLIST	DALALQGSL	DALALQGSL	0.0406	32218	24.117	0.0406	0
0	AEEHRGLLI	PEPLIST	AEEHRGLLI	AEEHRGLLI	0.035	34226	29.0669	0.035	0
0	EEHRGLLII	PEPLIST	EEHRGLLII	EEHRGLLII	0.0243	38436.8	43.2163	0.0243	0
0	EHRGLLIIR	PEPLIST	EHRGLLIIR	EHRGLLIIR	0.009	45364.6	85.9786	0.009	0
0	HRGLLIIRY	PEPLIST	HRGLLIIRY	HRGLLIIRY	0.0131	43391.4	71.4045	0.0131	0
0	RGLLIIRYP	PEPLIST	RGLLIIRYP	RGLLIIRYP	0.064	25014.6	11.9042	0.064	0
0	GLLIIRYPM	PEPLIST	GLLIIRYPM	GLLIIRYPM	0.0354	34081.5	28.6766	0.0354	0
0	LLIIRYPME	PEPLIST	LLIIRYPME	LLIIRYPME	0.0193	40593.7	53.5321	0.0193	0
0	LIIRYPMEH	PEPLIST	LIIRYPMEH	LIIRYPMEH	0.0132	43350.2	71.1023	0.0132	0
0	IIRYPMEHG	PEPLIST	IIRYPMEHG	IIRYPMEHG	0.0141	42910.5	67.9916	0.0141	0
0	PRVFRGSAV	PEPLIST	PRVFRGSAV	PRVFRGSAV	0.015	42515.9	65.2296	0.015	0
0	RVFRGSAVG	PEPLIST	RVFRGSAVG	RVFRGSAVG	0.0425	31570.2	22.6777	0.0425	0
0	VFRGSAVGT	PEPLIST	VFRGSAVGT	VFRGSAVGT	0.009	45357.2	85.9267	0.009	0
0	FRGSAVGTH	PEPLIST	FRGSAVGTH	FRGSAVGTH	0.0082	45740.6	88.6169	0.0082	0
0	RGSAVGTHS	PEPLIST	RGSAVGTHS	RGSAVGTHS	0.037	33486.8	27.1552	0.037	0
0	GSAVGTHSV	PEPLIST	GSAVGTHSV	GSAVGTHSV	0.0561	27236.2	14.8748	0.0561	0
0	SAVGTHSVE	PEPLIST	SAVGTHSVE	SAVGTHSVE	0.0168	41675.1	59.7487	0.0168	0
0	AVGTHSVEY	PEPLIST	AVGTHSVEY	AVGTHSVEY	0.0233	38875.1	45.0944	0.0233	0
0	VGTHSVEYF	PEPLIST	VGTHSVEYF	VGTHSVEYF	0.2611	2964.6	0.2833	0.2611	1
0	PGQEGARRM	PEPLIST	PGQEGARRM	PGQEGARRM	0.0329	35031.9	31.3345	0.0329	0
0	GQEGARRMF	PEPLIST	GQEGARRMF	GQEGARRMF	0.0278	37020.5	37.7559	0.0278	0
0	QEGARRMFT	PEPLIST	QEGARRMFT	QEGARRMFT	0.0103	44704.3	81.0761	0.0103	0
0	EGARRMFTW	PEPLIST	EGARRMFTW	EGARRMFTW	0.2694	2709.38	0.2491	0.2694	1
0	GARRMFTWK	PEPLIST	GARRMFTWK	GARRMFTWK	0.0479	29764.7	19.1163	0.0479	0
0	ARRMFTWKK	PEPLIST	ARRMFTWKK	ARRMFTWKK	0.018	41166.9	56.7487	0.018	0
0	RRMFTWKKR	PEPLIST	RRMFTWKKR	RRMFTWKKR	0.014	42951.4	68.2762	0.014	0
0	TIQPVEDEY	PEPLIST	TIQPVEDEY	TIQPVEDEY	0.0164	41873.1	61.0208	0.0164	0
0	IQPVEDEYG	PEPLIST	IQPVEDEYG	IQPVEDEYG	0.0384	32987.3	25.9033	0.0384	0
0	QPVEDEYGN	PEPLIST	QPVEDEYGN	QPVEDEYGN	0.0033	48236.3	97.2994	0.0033	0
0	PVEDEYGNV	PEPLIST	PVEDEYGNV	PVEDEYGNV	0.0111	44335.9	78.3345	0.0111	0
0	VEDEYGNVF	PEPLIST	VEDEYGNVF	VEDEYGNVF	0.0487	29516.5	18.6563	0.0487	0
0	EDEYGNVFL	PEPLIST	EDEYGNVFL	EDEYGNVFL	0.0278	36997.6	37.6768	0.0278	0
0	DEYGNVFLW	PEPLIST	DEYGNVFLW	DEYGNVFLW	0.0595	26267.5	13.502	0.0595	0
0	EYGNVFLWN	PEPLIST	EYGNVFLWN	EYGNVFLWN	0.0093	45206.3	84.8536	0.0093	0
0	YGNVFLWNG	PEPLIST	YGNVFLWNG	YGNVFLWNG	0.085	19924.8	6.8709	0.085	0
0	KMAMDGYRH	PEPLIST	KMAMDGYRH	KMAMDGYRH	0.0139	42997	68.5931	0.0139	0
0	MAMDGYRHI	PEPLIST	MAMDGYRHI	MAMDGYRHI	0.096	17690.6	5.2355	0.096	0
0	AMDGYRHIL	PEPLIST	AMDGYRHIL	AMDGYRHIL	0.1075	15617.6	3.9715	0.1075	0
0	MDGYRHILN	PEPLIST	MDGYRHILN	MDGYRHILN	0.0178	41257.4	57.2857	0.0178	0
0	DGYRHILNL	PEPLIST	DGYRHILNL	DGYRHILNL	0.2108	5110.07	0.5937	0.2108	1
0	GYRHILNLL	PEPLIST	GYRHILNLL	GYRHILNLL	0.0418	31813	23.2087	0.0418	0
0	YRHILNLLS	PEPLIST	YRHILNLLS	YRHILNLLS	0.0136	43180.2	69.8642	0.0136	0
0	RHILNLLSP	PEPLIST	RHILNLLSP	RHILNLLSP	0.0359	33900.5	28.1871	0.0359	0
0	HILNLLSPS	PEPLIST	HILNLLSPS	HILNLLSPS	0.0158	42128	62.6905	0.0158	0
0	FKEDSSLEH	PEPLIST	FKEDSSLEH	FKEDSSLEH	0.0053	47235.4	95.7225	0.0053	0
0	KEDSSLEHF	PEPLIST	KEDSSLEHF	KEDSSLEHF	0.0357	33975.8	28.391	0.0357	0
0	EDSSLEHFL	PEPLIST	EDSSLEHFL	EDSSLEHFL	0.0355	34045.3	28.5791	0.0355	0
0	DSSLEHFLL	PEPLIST	DSSLEHFLL	DSSLEHFLL	0.1595	8901.16	1.4625	0.1595	1
0	SSLEHFLLI	PEPLIST	SSLEHFLLI	SSLEHFLLI	0.3803	816.898	0.0553	0.3803	1
0	SLEHFLLIH	PEPLIST	SLEHFLLIH	SLEHFLLIH	0.0111	44330.6	78.2956	0.0111	0
0	LEHFLLIHN	PEPLIST	LEHFLLIHN	LEHFLLIHN	0.0065	46583.7	93.8242	0.0065	0
0	EHFLLIHNL	PEPLIST	EHFLLIHNL	EHFLLIHNL	0.0729	22717.9	9.335	0.0729	0
0	HFLLIHNLD	PEPLIST	HFLLIHNLD	HFLLIHNLD	0.0119	43980.9	75.7072	0.0119	0
0	KSVSPTVNQ	PEPLIST	KSVSPTVNQ	KSVSPTVNQ	0.0204	40095.6	50.8946	0.0204	0
0	SVSPTVNQM	PEPLIST	SVSPTVNQM	SVSPTVNQM	0.0392	32707.2	25.2293	0.0392	0
0	VSPTVNQMS	PEPLIST	VSPTVNQMS	VSPTVNQMS	0.0636	25125	12.0371	0.0636	0
0	SPTVNQMST	PEPLIST	SPTVNQMST	SPTVNQMST	0.0135	43186.3	69.9062	0.0135	0
0	PTVNQMSTA	PEPLIST	PTVNQMSTA	PTVNQMSTA	0.0112	44287.4	77.9774	0.0112	0
0	TVNQMSTAM	PEPLIST	TVNQMSTAM	TVNQMSTAM	0.0446	30860	21.207	0.0446	0
0	VNQMSTAMQ	PEPLIST	VNQMSTAMQ	VNQMSTAMQ	0.022	39402.8	47.4317	0.022	0
0	NQMSTAMQN	PEPLIST	NQMSTAMQN	NQMSTAMQN	0.0107	44514.7	79.6499	0.0107	0
0	QMSTAMQNE	PEPLIST	QMSTAMQNE	QMSTAMQNE	0.0115	44167.8	77.0934	0.0115	0
0	LESWRRFTR	PEPLIST	LESWRRFTR	LESWRRFTR	0.0224	39249.2	46.7297	0.0224	0
0	ESWRRFTRR	PEPLIST	ESWRRFTRR	ESWRRFTRR	0.0411	32044.5	23.7285	0.0411	0
0	SWRRFTRRC	PEPLIST	SWRRFTRRC	SWRRFTRRC	0.0381	33099.9	26.1833	0.0381	0
0	WRRFTRRCC	PEPLIST	WRRFTRRCC	WRRFTRRCC	0.0126	43607.9	72.9842	0.0126	0
0	RRFTRRCCC	PEPLIST	RRFTRRCCC	RRFTRRCCC	0.0395	32625.2	25.0308	0.0395	0
0	RFTRRCCCS	PEPLIST	RFTRRCCCS	RFTRRCCCS	0.0288	36625.6	36.3831	0.0288	0
0	FTRRCCCSS	PEPLIST	FTRRCCCSS	FTRRCCCSS	0.0477	29828.2	19.2326	0.0477	0
0	TRRCCCSSR	PEPLIST	TRRCCCSSR	TRRCCCSSR	0.0152	42433.6	64.6786	0.0152	0
0	RRCCCSSRR	PEPLIST	RRCCCSSRR	RRCCCSSRR	0.0157	42184.1	63.0565	0.0157	0
0	SPWQARGGM	PEPLIST	SPWQARGGM	SPWQARGGM	0.0332	34914.2	30.9787	0.0332	0
0	PWQARGGMS	PEPLIST	PWQARGGMS	PWQARGGMS	0.0065	46606.4	93.9578	0.0065	0
0	WQARGGMSG	PEPLIST	WQARGGMSG	WQARGGMSG	0.0184	40953.2	55.4762	0.0184	0
0	QARGGMSGA	PEPLIST	QARGGMSGA	QARGGMSGA	0.0128	43554.7	72.5962	0.0128	0
0	ARGGMSGAA	PEPLIST	ARGGMSGAA	ARGGMSGAA	0.0094	45157.9	84.4912	0.0094	0
0	RGGMSGAAF	PEPLIST	RGGMSGAAF	RGGMSGAAF	0.2273	4274.21	0.4607	0.2273	1
0	GGMSGAAFY	PEPLIST	GGMSGAAFY	GGMSGAAFY	0.0668	24272.3	11.009	0.0668	0
0	GMSGAAFYA	PEPLIST	GMSGAAFYA	GMSGAAFYA	0.0287	36645.9	36.4537	0.0287	0
0	MSGAAFYAT	PEPLIST	MSGAAFYAT	MSGAAFYAT	0.0739	22473.4	9.0915	0.0739	0
0	KPMAVAGAS	PEPLIST	KPMAVAGAS	KPMAVAGAS	0.0162	41981.5	61.7321	0.0162	0
0	PMAVAGASQ	PEPLIST	PMAVAGASQ	PMAVAGASQ	0.0067	46521.8	93.459	0.0067	0
0	MAVAGASQY	PEPLIST	MAVAGASQY	MAVAGASQY	0.0266	37495.3	39.5198	0.0266	0
0	AVAGASQYT	PEPLIST	AVAGASQYT	AVAGASQYT	0.017	41602.1	59.3201	0.017	0
0	VAGASQYTF	PEPLIST	VAGASQYTF	VAGASQYTF	0.1952	6052.34	0.7722	0.1952	1
0	AGASQYTFH	PEPLIST	AGASQYTFH	AGASQYTFH	0.0502	29045.4	17.7913	0.0502	0
0	GASQYTFHL	PEPLIST	GASQYTFHL	GASQYTFHL	0.1197	13692.6	3.0798	0.1197	0
0	ASQYTFHLE	PEPLIST	ASQYTFHLE	ASQYTFHLE	0.0666	24321.8	11.0695	0.0666	0
0	SQYTFHLEA	PEPLIST	SQYTFHLEA	SQYTFHLEA	0.0741	22438.7	9.0567	0.0741	0
0	LSSSSSWLR	PEPLIST	LSSSSSWLR	LSSSSSWLR	0.0477	29828.2	19.2326	0.0477	0
0	SSSSSWLRN	PEPLIST	SSSSSWLRN	SSSSSWLRN	0.0393	32677.1	25.1565	0.0393	0
0	SSSSWLRNQ	PEPLIST	SSSSWLRNQ	SSSSWLRNQ	0.0207	39946.7	50.0994	0.0207	0
0	SSSWLRNQK	PEPLIST	SSSWLRNQK	SSSWLRNQK	0.0587	26486.4	13.8025	0.0587	0
0	SSWLRNQKH	PEPLIST	SSWLRNQKH	SSWLRNQKH	0.0203	40130.8	51.0818	0.0203	0
0	SWLRNQKHS	PEPLIST	SWLRNQKHS	SWLRNQKHS	0.0105	44628	80.4978	0.0105	0
0	WLRNQKHSK	PEPLIST	WLRNQKHSK	WLRNQKHSK	0.0114	44208.9	77.3975	0.0114	0
0	LRNQKHSKK	PEPLIST	LRNQKHSKK	LRNQKHSKK	0.0098	44980.4	83.1589	0.0098	0
0	RNQKHSKKR	PEPLIST	RNQKHSKKR	RNQKHSKKR	0.0159	42093.9	62.4673	0.0159	0
0	MAQFETEYQ	PEPLIST	MAQFETEYQ	MAQFETEYQ	0.0244	38416.9	43.1332	0.0244	0
0	AQFETEYQR	PEPLIST	AQFETEYQR	AQFETEYQR	0.0149	42571.6	65.621	0.0149	0
0	QFETEYQRL	PEPLIST	QFETEYQRL	QFETEYQRL	0.0371	33464.7	27.1008	0.0371	0
0	FETEYQRLE	PEPLIST	FETEYQRLE	FETEYQRLE	0.0105	44607.2	80.3404	0.0105	0
0	ETEYQRLEA	PEPLIST	ETEYQRLEA	ETEYQRLEA	0.0135	43215.7	70.1168	0.0135	0
0	LRLMDLLSR	PEPLIST	LRLMDLLSR	LRLMDLLSR	0.0097	45003.8	83.3345	0.0097	0
0	RLMDLLSRK	PEPLIST	RLMDLLSRK	RLMDLLSRK	0.0294	36386.7	35.5519	0.0294	0
0	LMDLLSRKH	PEPLIST	LMDLLSRKH	LMDLLSRKH	0.011	44397.3	78.7871	0.011	0
0	MDLLSRKHP	PEPLIST	MDLLSRKHP	MDLLSRKHP	0.0097	45022.8	83.4773	0.0097	0
0	DLLSRKHPL	PEPLIST	DLLSRKHPL	DLLSRKHPL	0.0474	29944.3	19.4445	0.0474	0
0	LLSRKHPLD	PEPLIST	LLSRKHPLD	LLSRKHPLD	0.018	41147.3	56.6323	0.018	0
0	LSRKHPLDT	PEPLIST	LSRKHPLDT	LSRKHPLDT	0.0193	40586.2	53.4928	0.0193	0
0	SRKHPLDTL	PEPLIST	SRKHPLDTL	SRKHPLDTL	0.0387	32901.7	25.698	0.0387	0
0	RKHPLDTLF	PEPLIST	RKHPLDTLF	RKHPLDTLF	0.0383	33038	26.0263	0.0383	0
0	NIDPNLSRG	PEPLIST	NIDPNLSRG	NIDPNLSRG	0.014	42986.8	68.522	0.014	0
0	IDPNLSRGL	PEPLIST	IDPNLSRGL	IDPNLSRGL	0.0814	20716.4	7.491	0.0814	0
0	DPNLSRGLV	PEPLIST	DPNLSRGLV	DPNLSRGLV	0.0231	38924.4	45.3067	0.0231	0
0	PNLSRGLVV	PEPLIST	PNLSRGLVV	PNLSRGLVV	0.0367	33627.6	27.5013	0.0367	0
0	NLSRGLVVI	PEPLIST	NLSRGLVVI	NLSRGLVVI	0.0422	31686.9	22.928	0.0422	0
0	LSRGLVVIW	PEPLIST	LSRGLVVIW	LSRGLVVIW	0.068	23969.3	10.6664	0.068	0
0	SRGLVVIWV	PEPLIST	SRGLVVIWV	SRGLVVIWV	0.0211	39813.3	49.4192	0.0211	0
0	RGLVVIWVL	PEPLIST	RGLVVIWVL	RGLVVIWVL	0.2018	5629.97	0.6908	0.2018	1
0	GLVVIWVLV	PEPLIST	GLVVIWVLV	GLVVIWVLV	0.0199	40300	51.981	0.0199	0
0	SKRQVHKST	PEPLIST	SKRQVHKST	SKRQVHKST	0.0069	46413.7	92.8207	0.0069	0
0	KRQVHKSTP	PEPLIST	KRQVHKSTP	KRQVHKSTP	0.0121	43860.2	74.8146	0.0121	0
0	RQVHKSTPA	PEPLIST	RQVHKSTPA	RQVHKSTPA	0.0301	36096.9	34.5849	0.0301	0
0	QVHKSTPAW	PEPLIST	QVHKSTPAW	QVHKSTPAW	0.055	27588.8	15.4094	0.055	0
0	VHKSTPAWK	PEPLIST	VHKSTPAWK	VHKSTPAWK	0.0166	41770.4	60.3452	0.0166	0
0	HKSTPAWKE	PEPLIST	HKSTPAWKE	HKSTPAWKE	0.0057	47023.8	95.3849	0.0057	0
0	KSTPAWKEL	PEPLIST	KSTPAWKEL	KSTPAWKEL	0.1495	9917.21	1.7562	0.1495	1
0	STPAWKELQ	PEPLIST	STPAWKELQ	STPAWKELQ	0.0471	30030.9	19.6021	0.0471	0
0	TPAWKELQM	PEPLIST	TPAWKELQM	TPAWKELQM	0.044	31061.7	21.6116	0.044	0
0	NVFAISYIT	PEPLIST	NVFAISYIT	NVFAISYIT	0.0182	41079.7	56.2302	0.0182	0
0	VFAISYITG	PEPLIST	VFAISYITG	VFAISYITG	0.03	36127.4	34.6815	0.03	0
0	FAISYITGF	PEPLIST	FAISYITGF	FAISYITGF	0.1228	13244.1	2.9026	0.1228	0
0	AISYITGFL	PEPLIST	AISYITGFL	AISYITGFL	0.0613	25767	12.8308	0.0613	0
0	ISYITGFLF	PEPLIST	ISYITGFLF	ISYITGFLF	0.2903	2161.31	0.1851	0.2903	1
0	SYITGFLFA	PEPLIST	SYITGFLFA	SYITGFLFA	0.04	32426.7	24.5856	0.04	0
0	YITGFLFAV	PEPLIST	YITGFLFAV	YITGFLFAV	0.0527	28273.6	16.4875	0.0527	0
0	ITGFLFAVN	PEPLIST	ITGFLFAVN	ITGFLFAVN	0.0372	33435	27.0277	0.0372	0
0	TGFLFAVNG	PEPLIST	TGFLFAVNG	TGFLFAVNG	0.1014	16699.1	4.5834	0.1014	0
0	WGVSHTRVA	PEPLIST	WGVSHTRVA	WGVSHTRVA	0.0489	29443.1	18.5194	0.0489	0
0	GVSHTRVAT	PEPLIST	GVSHTRVAT	GVSHTRVAT	0.0086	45563.8	87.379	0.0086	0
0	VSHTRVATE	PEPLIST	VSHTRVATE	VSHTRVATE	0.0512	28724.1	17.2341	0.0512	0
0	SHTRVATES	PEPLIST	SHTRVATES	SHTRVATES	0.0191	40675	53.9598	0.0191	0
0	HTRVATESR	PEPLIST	HTRVATESR	HTRVATESR	0.0209	39899.6	49.8559	0.0209	0
0	TRVATESRP	PEPLIST	TRVATESRP	TRVATESRP	0.0058	46943.5	95.2563	0.0058	0
0	RVATESRPG	PEPLIST	RVATESRPG	RVATESRPG	0.0194	40518.6	53.1368	0.0194	0
0	VATESRPGH	PEPLIST	VATESRPGH	VATESRPGH	0.0104	44663.2	80.765	0.0104	0
0	ATESRPGHV	PEPLIST	ATESRPGHV	ATESRPGHV	0.0279	36952.4	37.5201	0.0279	0
0	KQSPRLKST	PEPLIST	KQSPRLKST	KQSPRLKST	0.0176	41332	57.7275	0.0176	0
0	QSPRLKSTC	PEPLIST	QSPRLKSTC	QSPRLKSTC	0.1273	12619	2.6742	0.1273	0
0	SPRLKSTCM	PEPLIST	SPRLKSTCM	SPRLKSTCM	0.0373	33411.8	26.9701	0.0373	0
0	PRLKSTCME	PEPLIST	PRLKSTCME	PRLKSTCME	0.0041	47816.4	96.642	0.0041	0
0	RLKSTCMER	PEPLIST	RLKSTCMER	RLKSTCMER	0.0178	41228	57.1111	0.0178	0
0	LKSTCMERL	PEPLIST	LKSTCMERL	LKSTCMERL	0.0335	34798	30.6511	0.0335	0
0	KSTCMERLQ	PEPLIST	KSTCMERLQ	KSTCMERLQ	0.0243	38439.7	43.2284	0.0243	0
0	STCMERLQP	PEPLIST	STCMERLQP	STCMERLQP	0.0202	40197.7	51.4378	0.0202	0
0	TCMERLQPP	PEPLIST	TCMERLQPP	TCMERLQPP	0.0186	40865.6	54.9584	0.0186	0
0	PEGRPAALA	PEPLIST	PEGRPAALA	PEGRPAALA	0.0075	46120.3	91.0808	0.0075	0
0	EGRPAALAF	PEPLIST	EGRPAALAF	EGRPAALAF	0.1062	15842.4	4.0937	0.1062	0
0	GRPAALAFA	PEPLIST	GRPAALAFA	GRPAALAFA	0.0298	36232.7	35.0164	0.0298	0
0	RPAALAFAV	PEPLIST	RPAALAFAV	RPAALAFAV	0.0718	22983.9	9.5988	0.0718	0
0	PAALAFAVA	PEPLIST	PAALAFAVA	PAALAFAVA	0.032	35366.2	32.3382	0.032	0
0	AALAFAVAL	PEPLIST	AALAFAVAL	AALAFAVAL	0.1216	13410.9	2.9618	0.1216	0
0	ALAFAVALV	PEPLIST	ALAFAVALV	ALAFAVALV	0.0525	28340.7	16.5966	0.0525	0
0	LAFAVALVM	PEPLIST	LAFAVALVM	LAFAVALVM	0.075	22213.5	8.8379	0.075	0
0	AFAVALVMM	PEPLIST	AFAVALVMM	AFAVALVMM	0.0347	34344.3	29.3905	0.0347	0
0	ICQAFPAVV	PEPLIST	ICQAFPAVV	ICQAFPAVV	0.0435	31221	21.9294	0.0435	0
0	CQAFPAVVQ	PEPLIST	CQAFPAVVQ	CQAFPAVVQ	0.0154	42304.8	63.8423	0.0154	0
0	QAFPAVVQC	PEPLIST	QAFPAVVQC	QAFPAVVQC	0.0338	34678.9	30.3138	0.0338	0
0	AFPAVVQCT	PEPLIST	AFPAVVQCT	AFPAVVQCT	0.0231	38938.3	45.3666	0.0231	0
0	FPAVVQCTL	PEPLIST	FPAVVQCTL	FPAVVQCTL	0.092	18481.4	5.7785	0.092	0
0	PAVVQCTLH	PEPLIST	PAVVQCTLH	PAVVQCTLH	0.0086	45548.5	87.2718	0.0086	0
0	AVVQCTLHT	PEPLIST	AVVQCTLHT	AVVQCTLHT	0.0137	43089.2	69.2335	0.0137	0
0	VVQCTLHTD	PEPLIST	VVQCTLHTD	VVQCTLHTD	0.0206	40017.6	50.4785	0.0206	0
0	VQCTLHTDD	PEPLIST	VQCTLHTDD	VQCTLHTDD	0.0081	45804	89.0595	0.0081	0
0	MEPEEVEVP	PEPLIST	MEPEEVEVP	MEPEEVEVP	0.0128	43520.8	72.3489	0.0128	0
0	EPEEVEVPA	PEPLIST	EPEEVEVPA	EPEEVEVPA	0.0074	46164.2	91.342	0.0074	0
0	PEEVEVPAT	PEPLIST	PEEVEVPAT	PEEVEVPAT	0.0037	48062.3	97.0277	0.0037	0
0	EEVEVPATE	PEPLIST	EEVEVPATE	EEVEVPATE	0.0046	47562.1	96.2408	0.0046	0
0	EVEVPATEL	PEPLIST	EVEVPATEL	EVEVPATEL	0.0227	39097	46.051	0.0227	0
0	VEVPATELL	PEPLIST	VEVPATELL	VEVPATELL	0.0469	30095.7	19.7196	0.0469	0
0	EVPATELLK	PEPLIST	EVPATELLK	EVPATELLK	0.0244	38411	43.109	0.0244	0
0	VPATELLKQ	PEPLIST	VPATELLKQ	VPATELLKQ	0.0087	45505.7	86.971	0.0087	0
0	PATELLKQE	PEPLIST	PATELLKQE	PATELLKQE	0.0046	47550.7	96.2229	0.0046	0
0	KIAELQHKR	PEPLIST	KIAELQHKR	KIAELQHKR	0.0175	41388.4	58.0608	0.0175	0
0	IAELQHKRE	PEPLIST	IAELQHKRE	IAELQHKRE	0.0124	43700.1	73.6538	0.0124	0
0	AELQHKREN	PEPLIST	AELQHKREN	AELQHKREN	0.005	47382.3	95.9561	0.005	0
[truncated: 4,758 more rows]

## Sheet: H-2-Ld_NetMHCpan
			H-2-Ld
[truncated: 4,999 more rows]

[truncated: 1 more sheets: H-2-Kd_NetMHCpan]
